# Supplementary material
Source: ML conference proceedings conference paper supplement (https://openaccess.thecvf.com/content/ACCV2020/html/Guo_Low-light_Color_Imaging_ACCV_2020_paper.html)
Supplement: Supplementary file 1 [file Guo_Low-light_Color_Imaging_ACCV_2020_supplemental.zip]

$\tilde{I}_{v_2, S_L, l_H}^{YUV}$

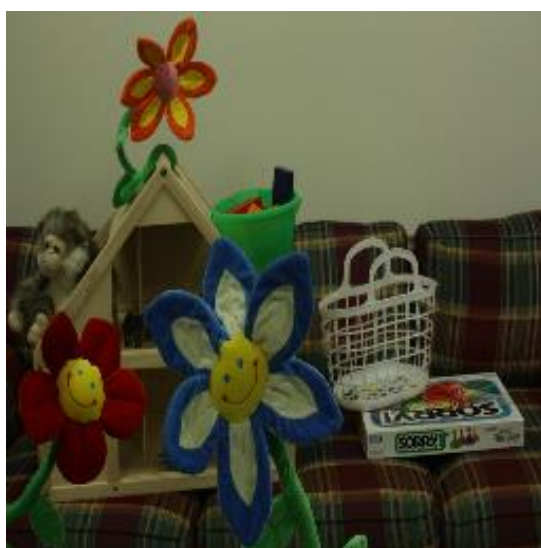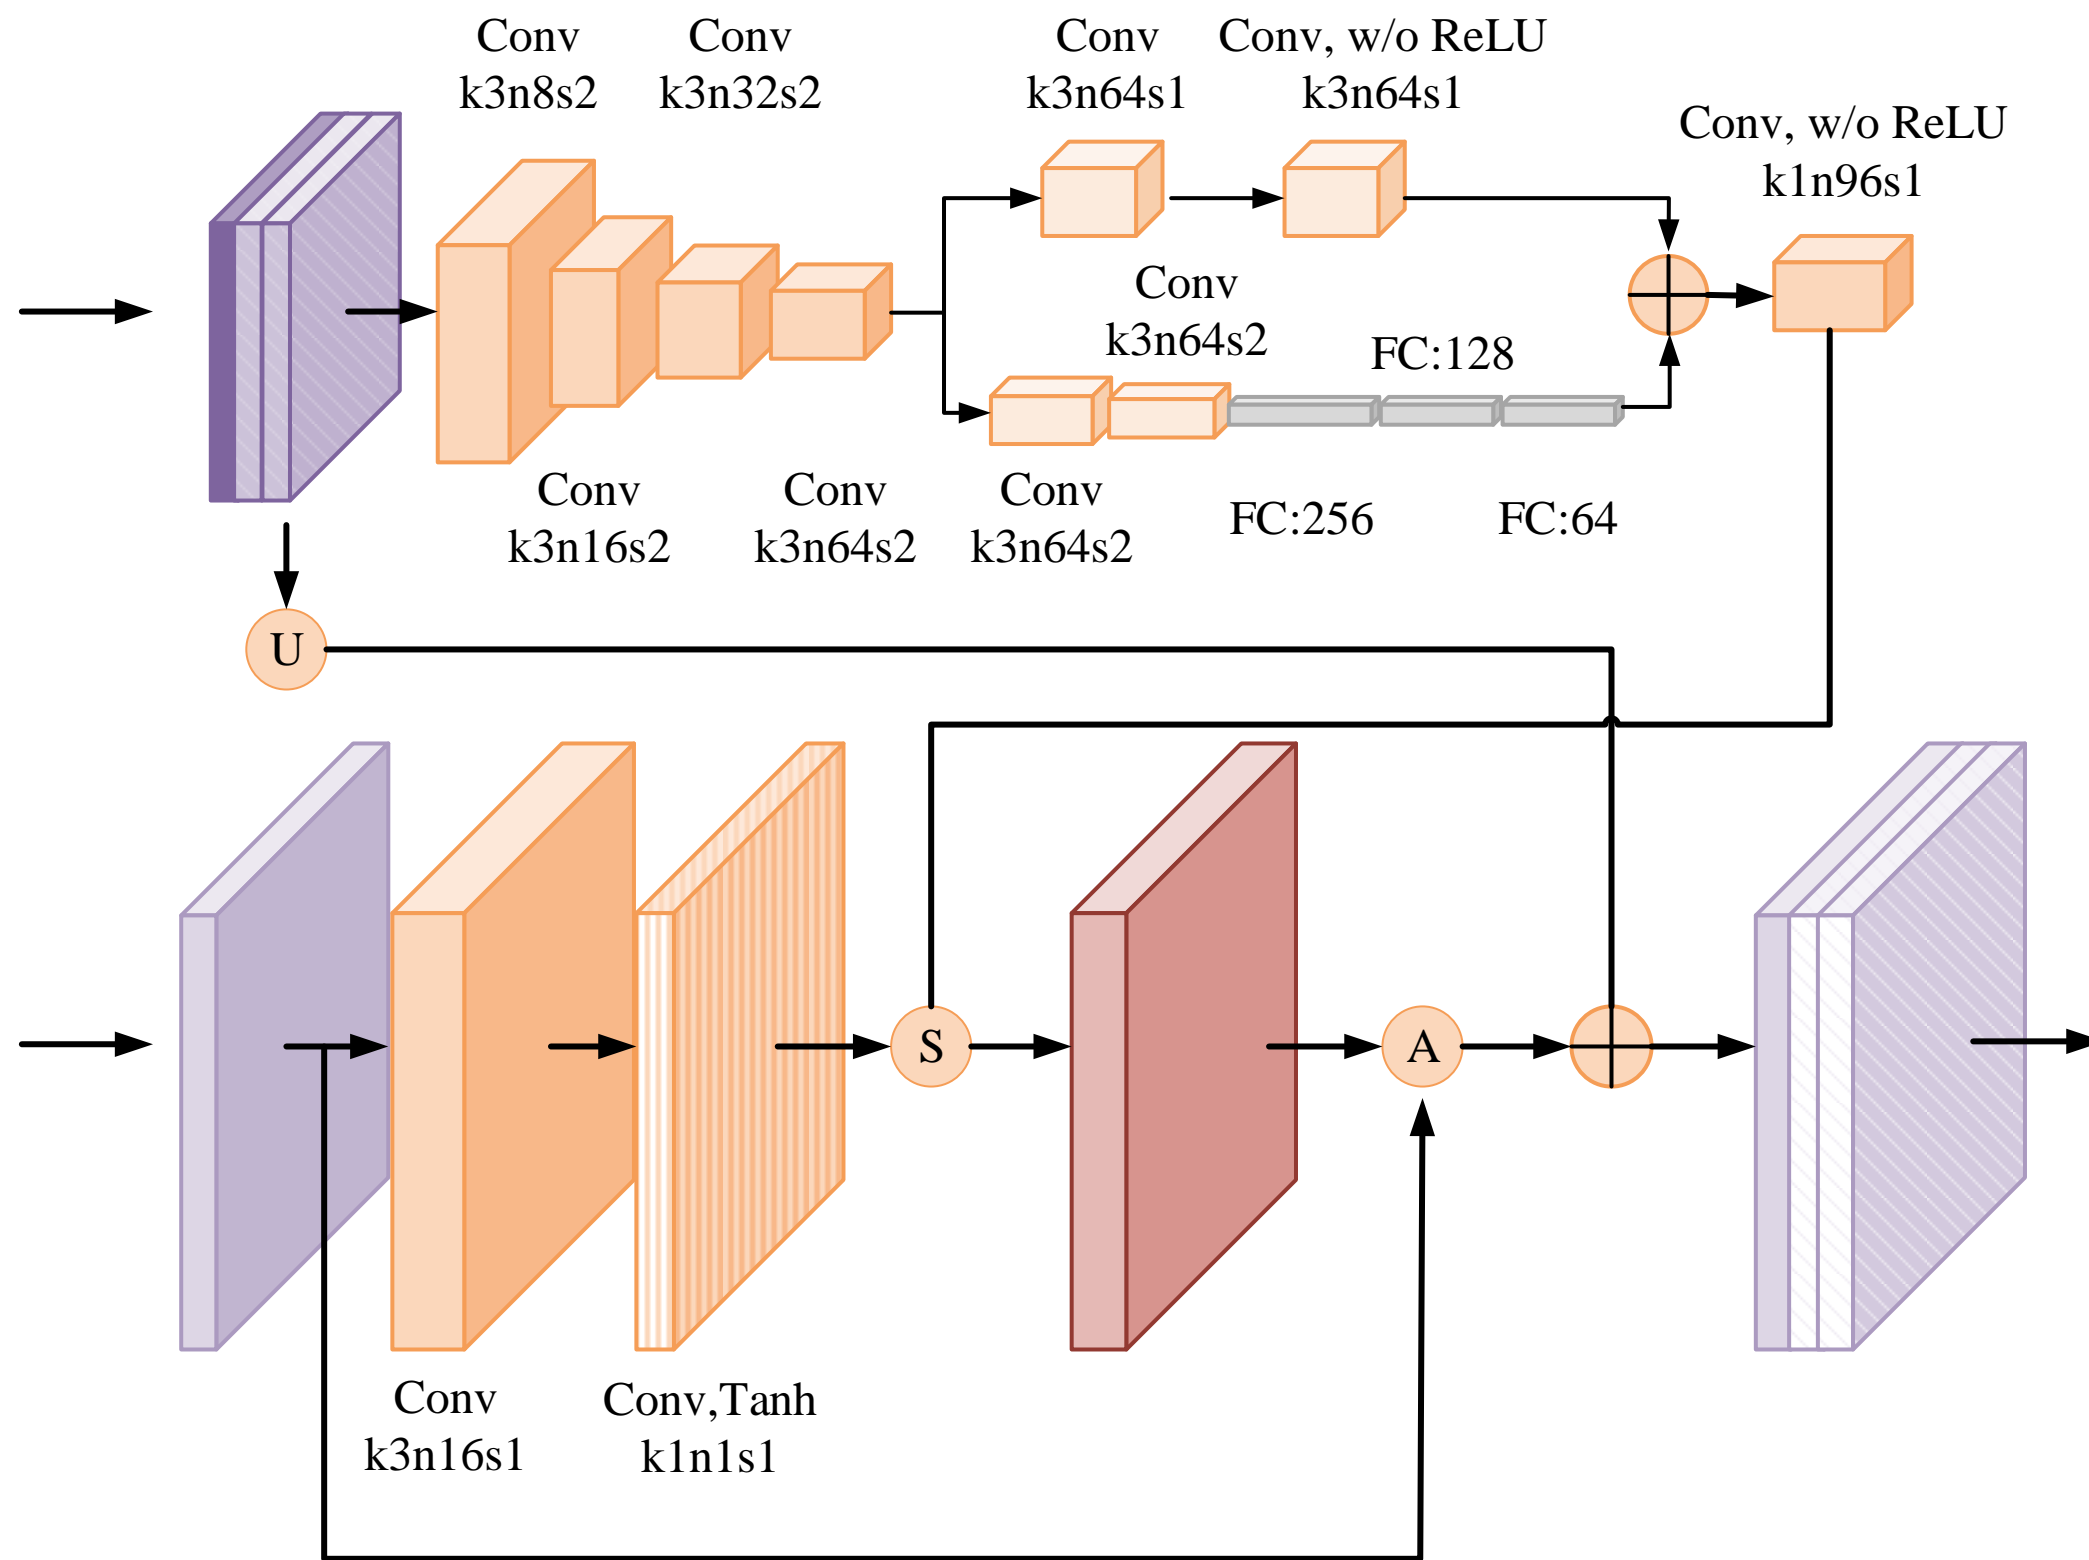

Final image:  $\tilde{I}_{v_2, S_H, l_H}^{YUV}$

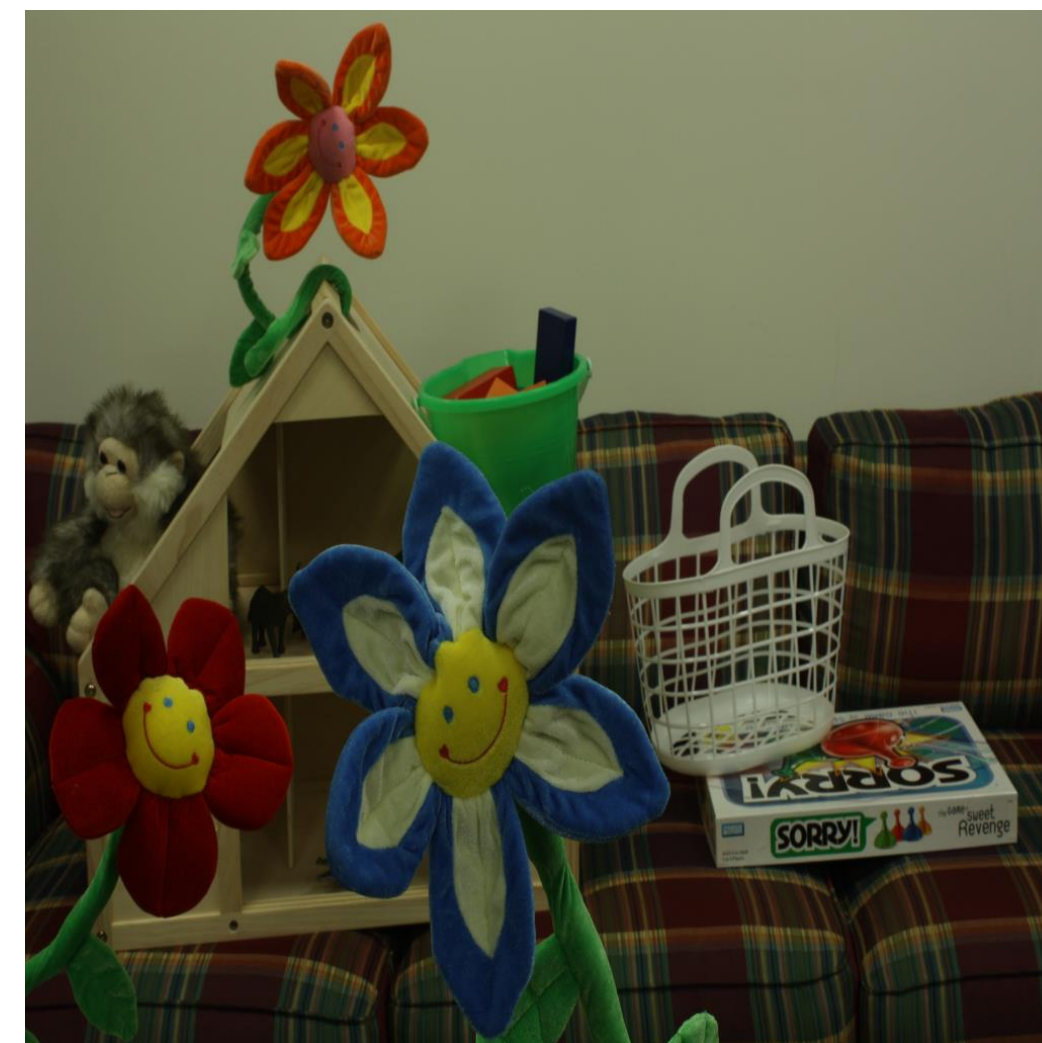

Input monochrome image:  $I_{v_2, S_H, l_H}^Y$

U Upsampling      S Slicing layer      A Applying coefficients layer
