# Supplementary material
Source: ML conference proceedings conference paper supplement (https://openaccess.thecvf.com/content/ACCV2020/html/Guo_Low-light_Color_Imaging_ACCV_2020_paper.html)
Supplement: Supplementary file 13 [file Guo_Low-light_Color_Imaging_ACCV_2020_supplemental.zip]

Input color image:  $I_{v_1, s_L, l_L}^{YUV}$

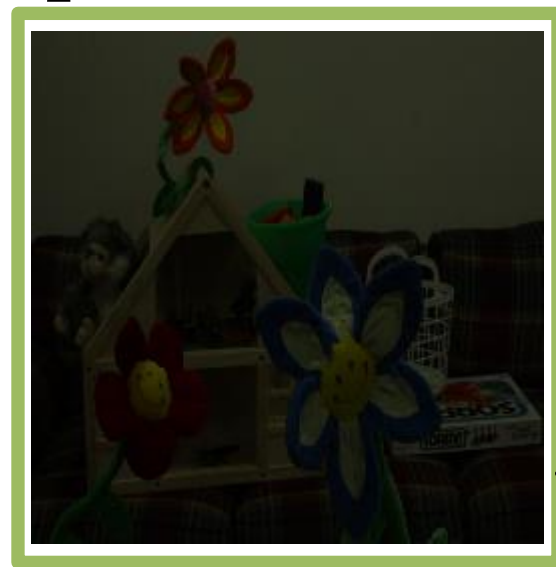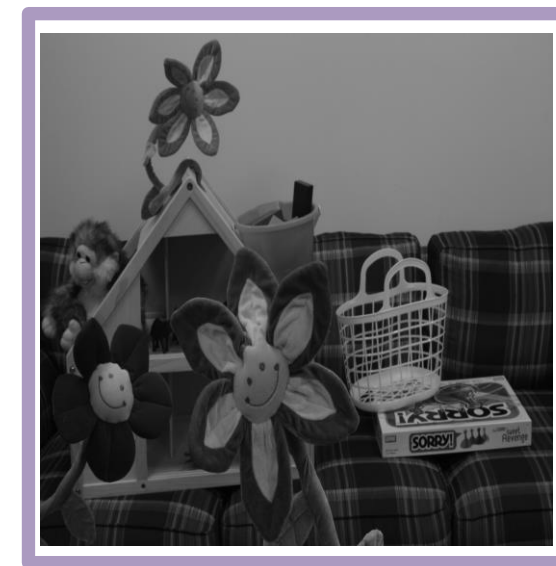

Concatenate

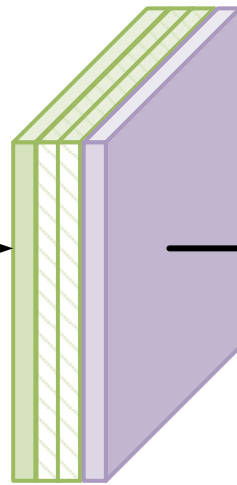

Conv  
k9n64

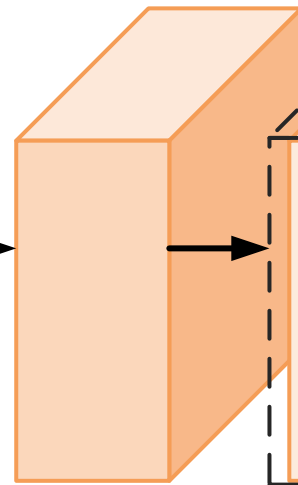

Conv+ReLU  
(k3n64) x 5

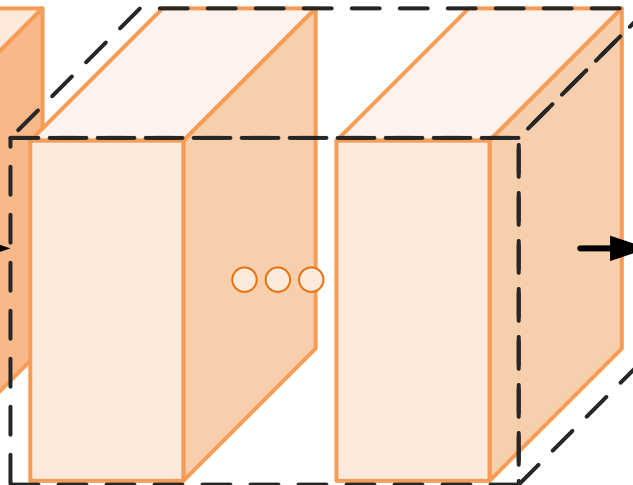

Conv  
k3n3

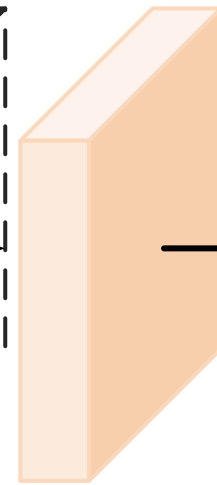

Sigmoid  
+Bias

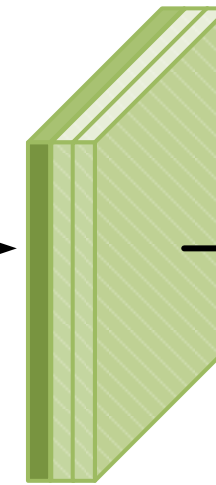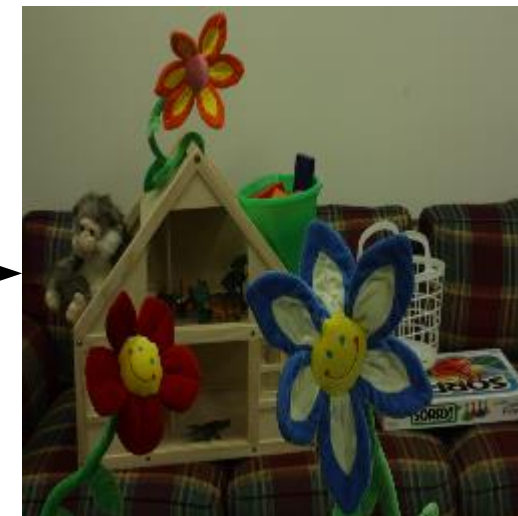

$\tilde{I}_{v_1, s_L, l_H}^{YUV}$

Downsampled monochrome image  $\tilde{I}_{v_2, s_L, l_H}^Y$
