# Supplementary material
Source: ML conference proceedings conference paper supplement (https://openaccess.thecvf.com/content/ACCV2020/html/Guo_Low-light_Color_Imaging_ACCV_2020_paper.html)
Supplement: Supplementary file 16 [file Guo_Low-light_Color_Imaging_ACCV_2020_supplemental.zip]

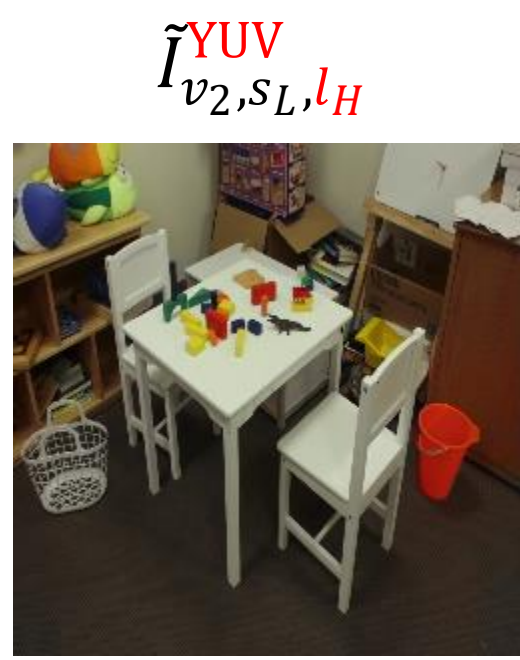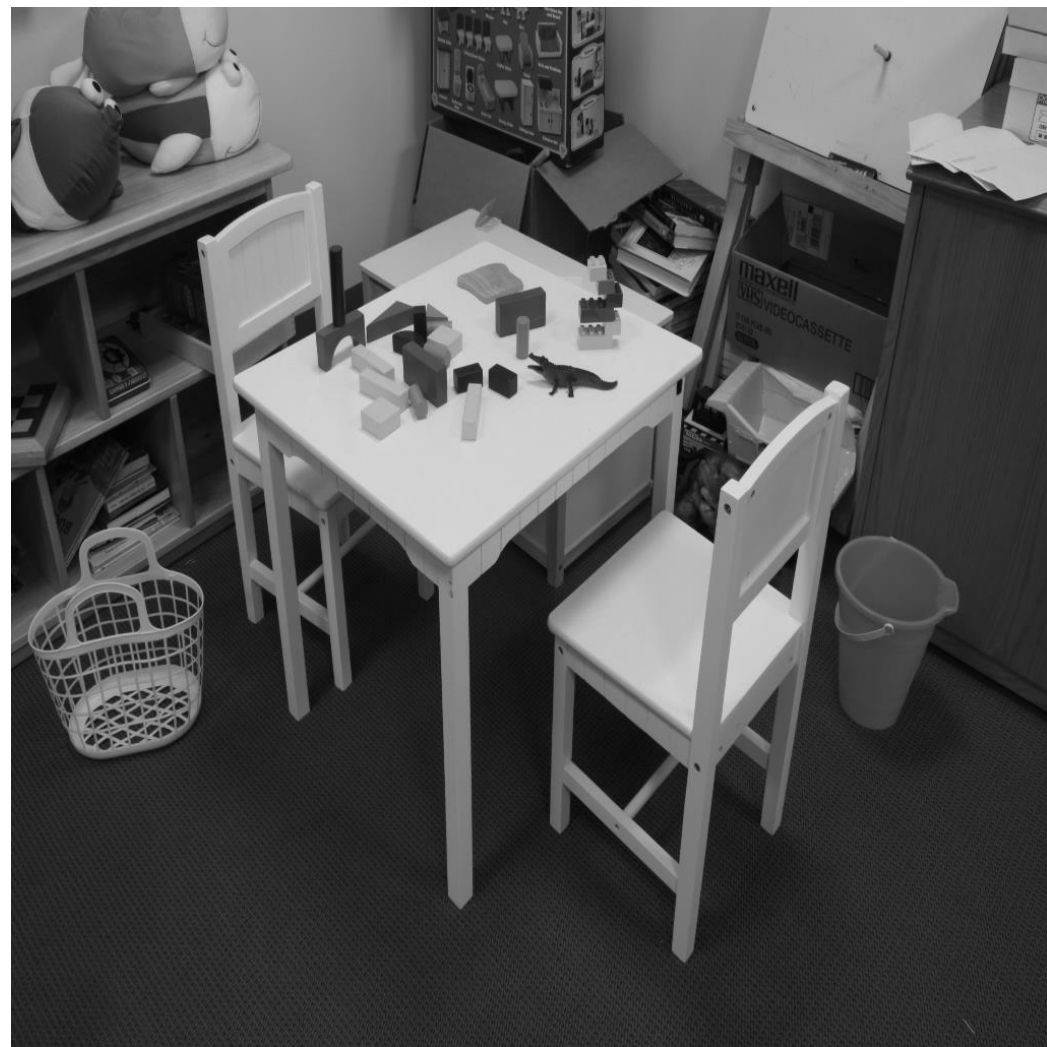

Input monochrome image:  $I_{v_2, S_H, l_H}^Y$

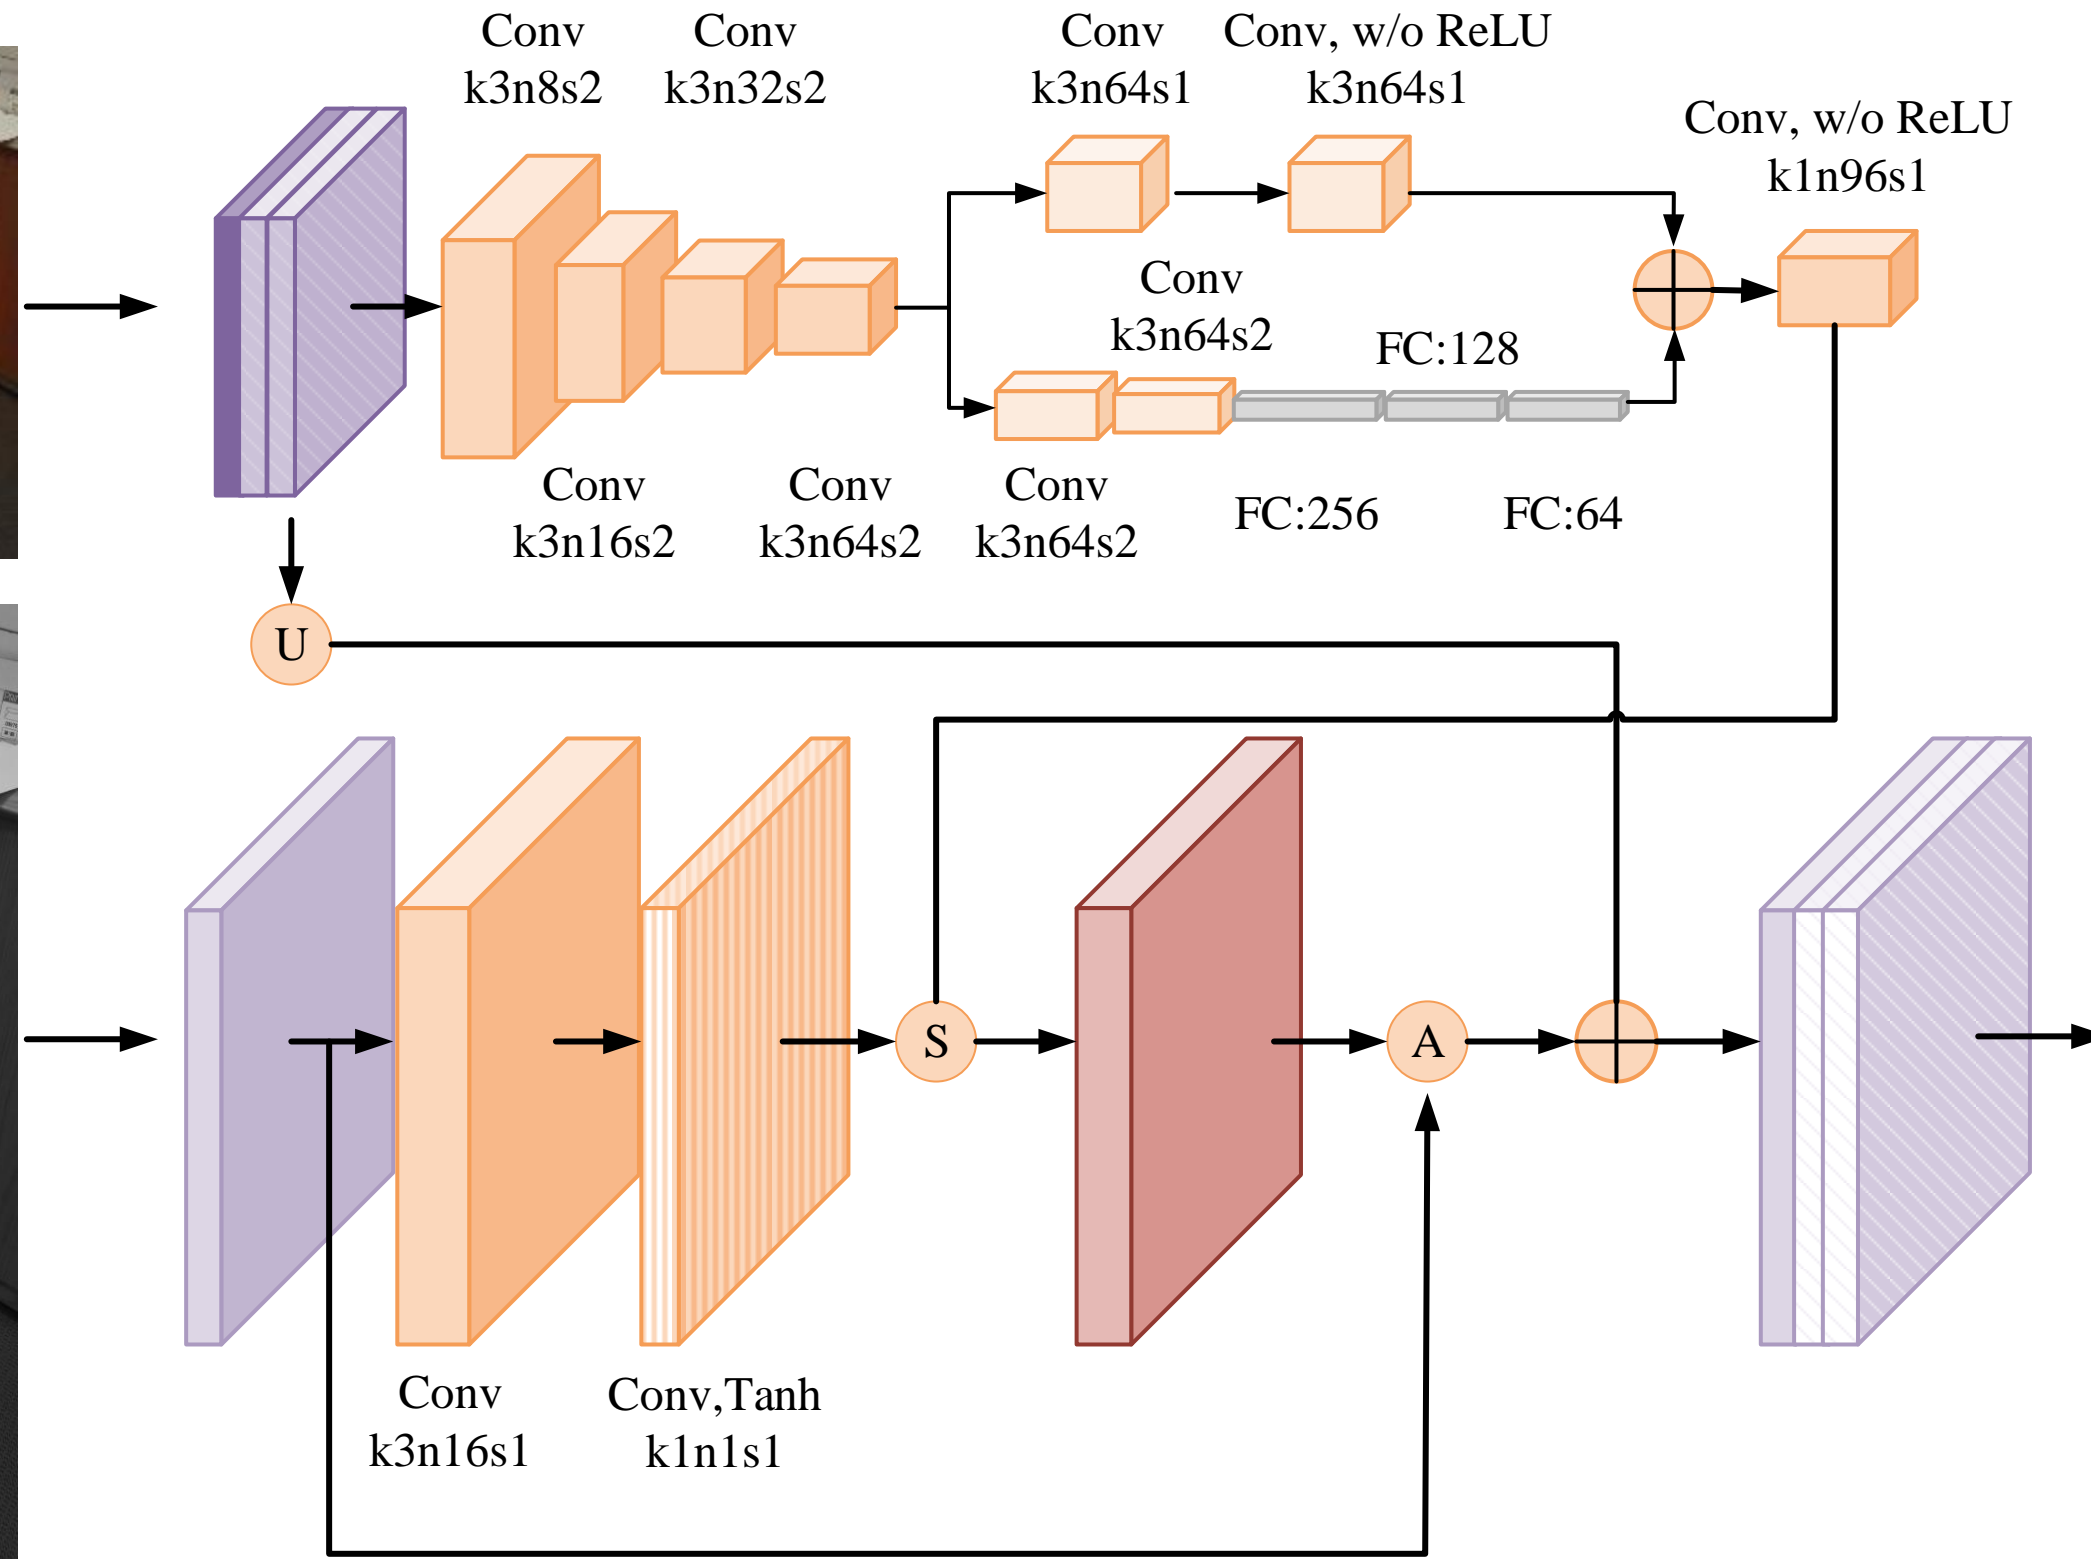

(U) Upsampling      (S) Slicing layer      (A) Applying coefficients layer

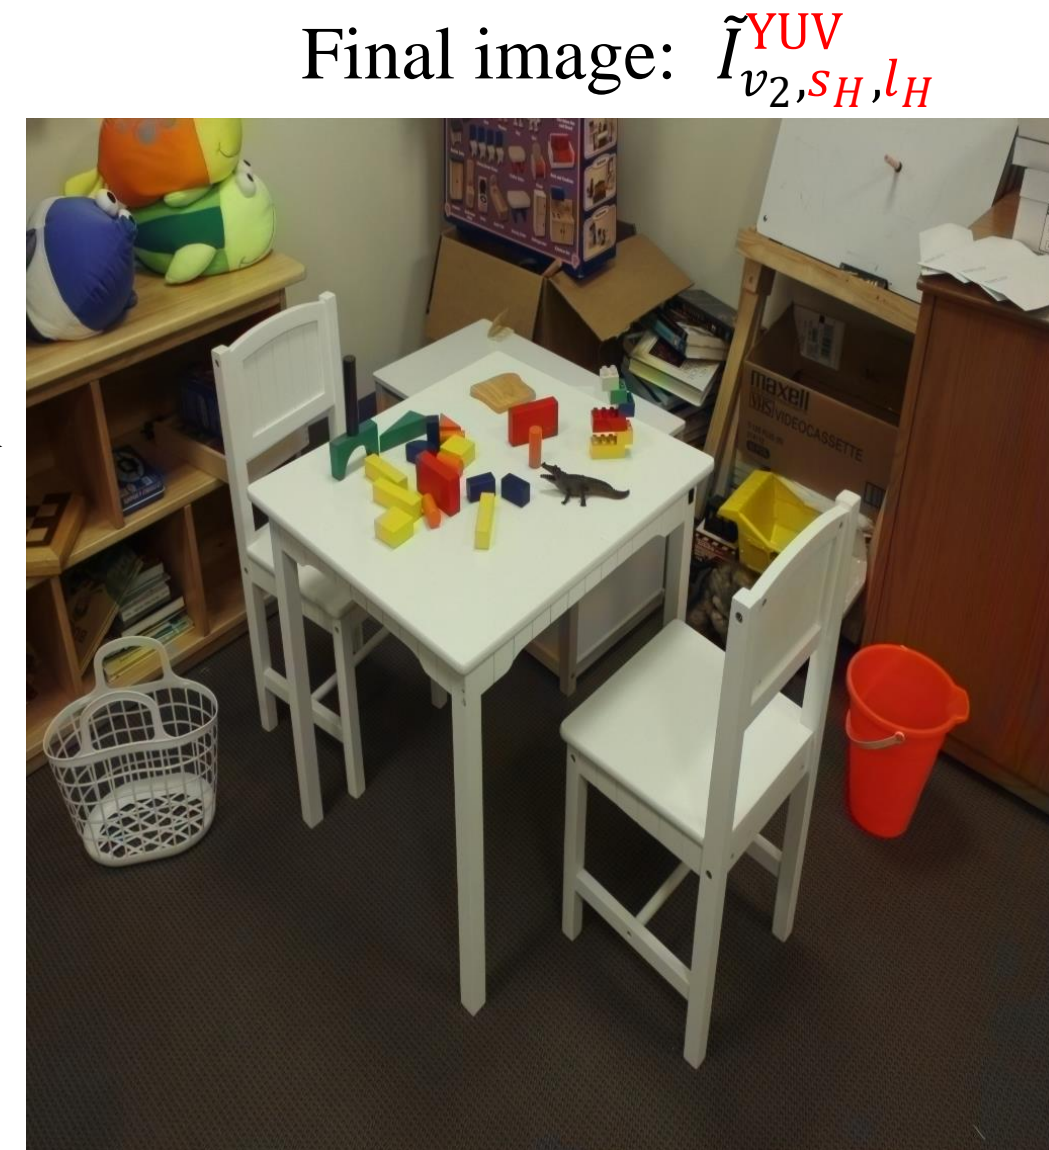

Final image:  $\tilde{I}_{v_2, S_H, l_H}^{YUV}$
