# Supplementary material
Source: ML conference proceedings conference paper supplement (https://openaccess.thecvf.com/content/ACCV2020/html/Guo_Low-light_Color_Imaging_ACCV_2020_paper.html)
Supplement: Supplementary file 23 [file Guo_Low-light_Color_Imaging_ACCV_2020_supplemental.zip]

Input color image:  $I_{v_1, s_L, l_L}^{YUV}$

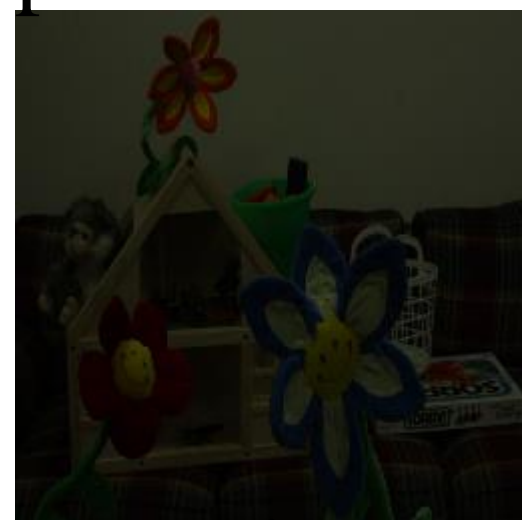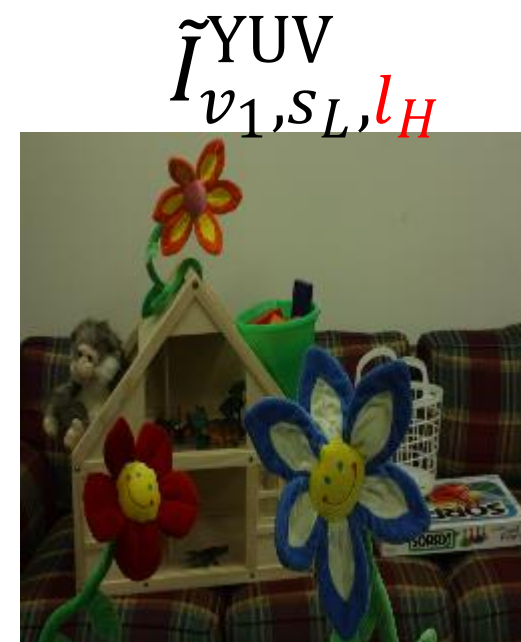

Concatenate

Ref-exposure-  
compensation  
Module

Ref-colorization  
Module

Ref-super-resolu-  
tion Module

Downsampling

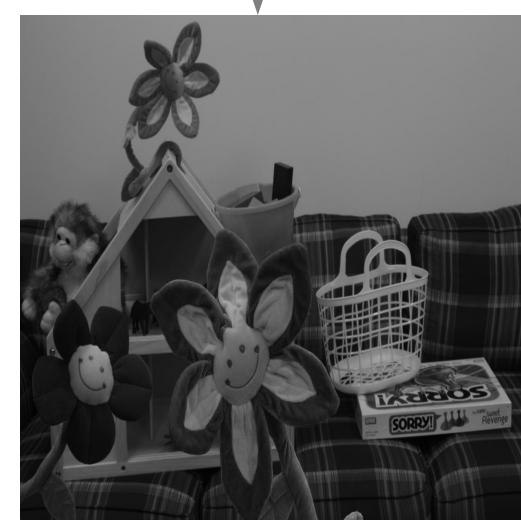

$\tilde{I}_{v_2, s_L, l_H}^Y$

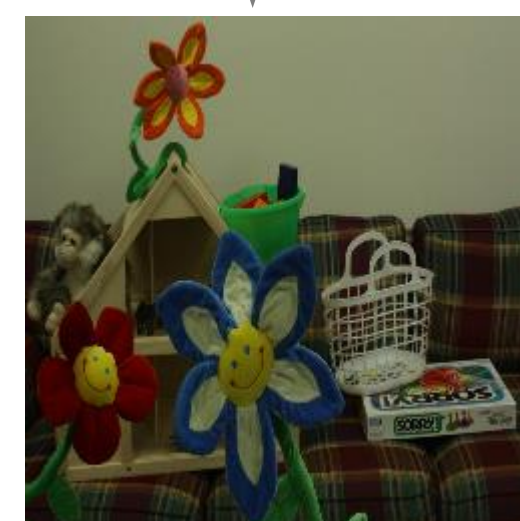

$\tilde{I}_{v_2, s_L, l_H}^{YUV}$

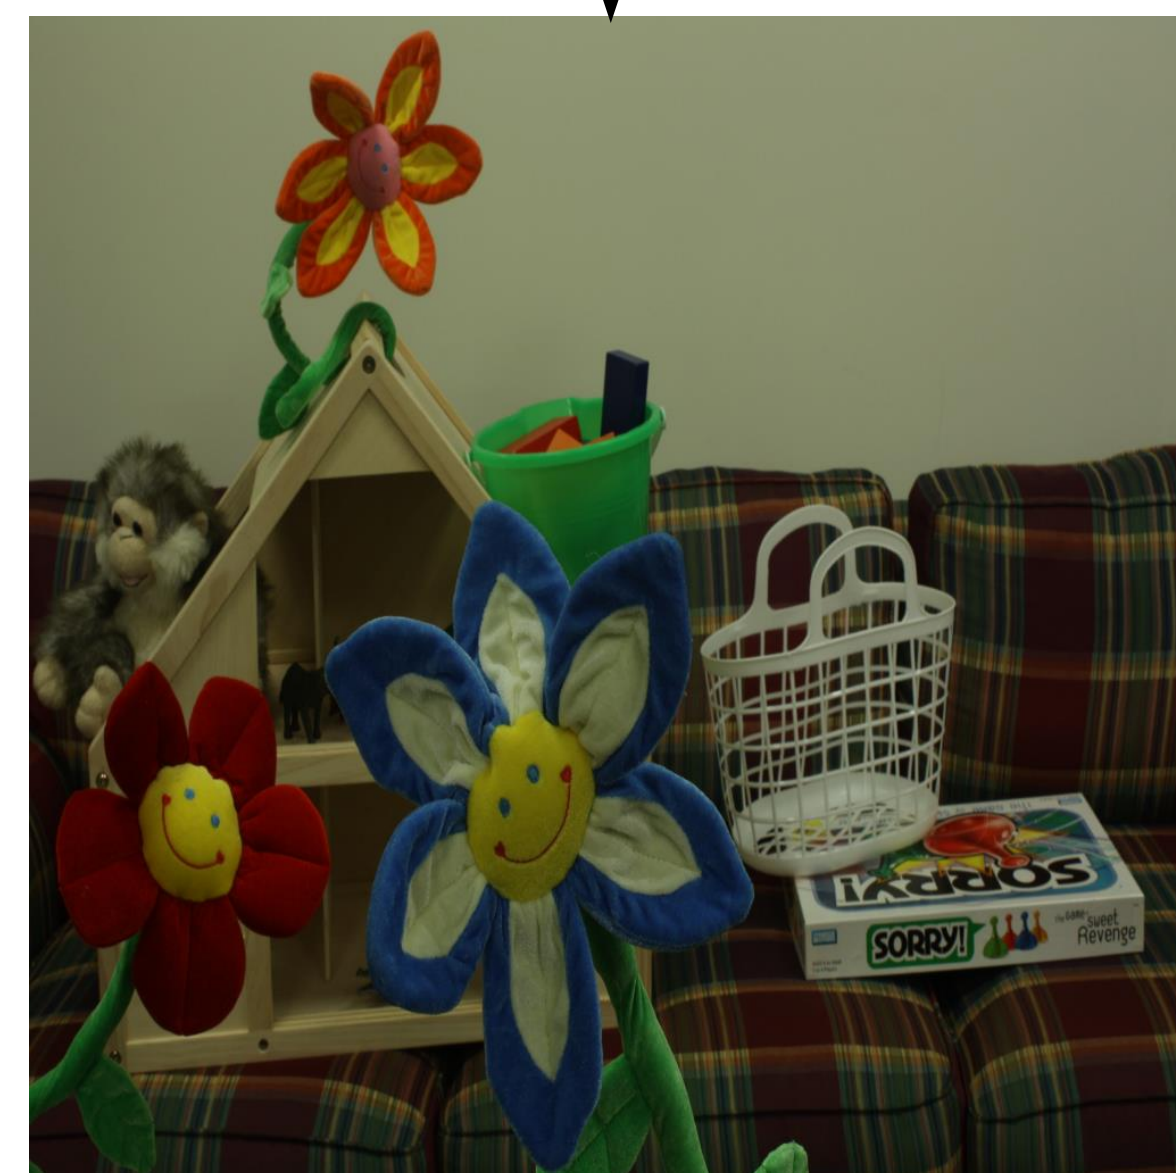

Final image:  $\tilde{I}_{v_2, s_H, l_H}^{YUV}$

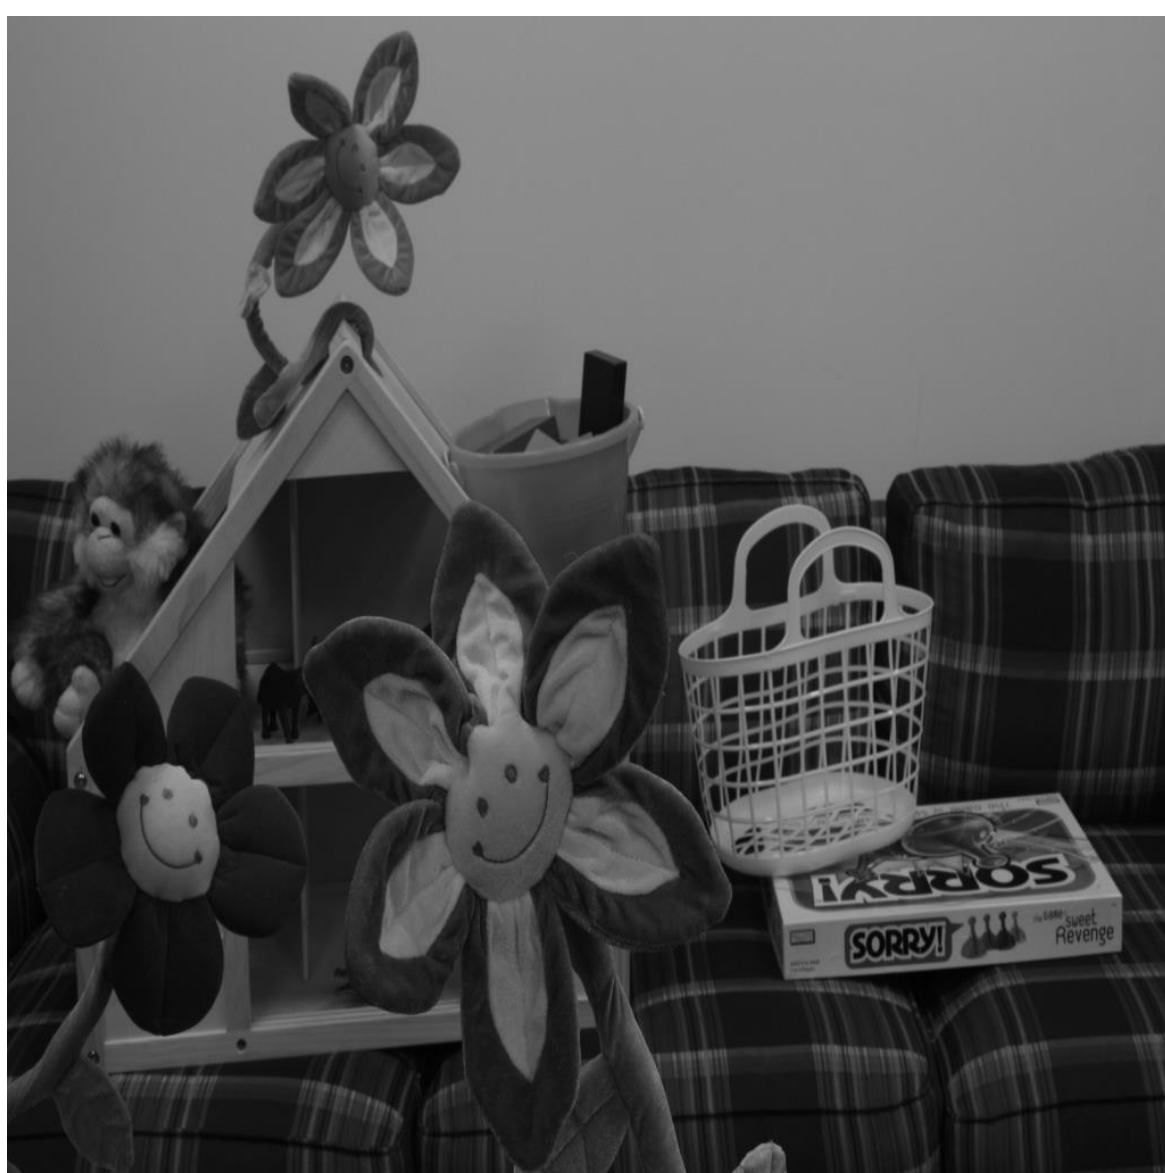

Input monochrome image:  $I_{v_2, s_H, l_H}^Y$
