# Supplementary material
Source: ML conference proceedings conference paper supplement (https://openaccess.thecvf.com/content/ACCV2020/html/Guo_Low-light_Color_Imaging_ACCV_2020_paper.html)

Vote-For-Best: #RefEC

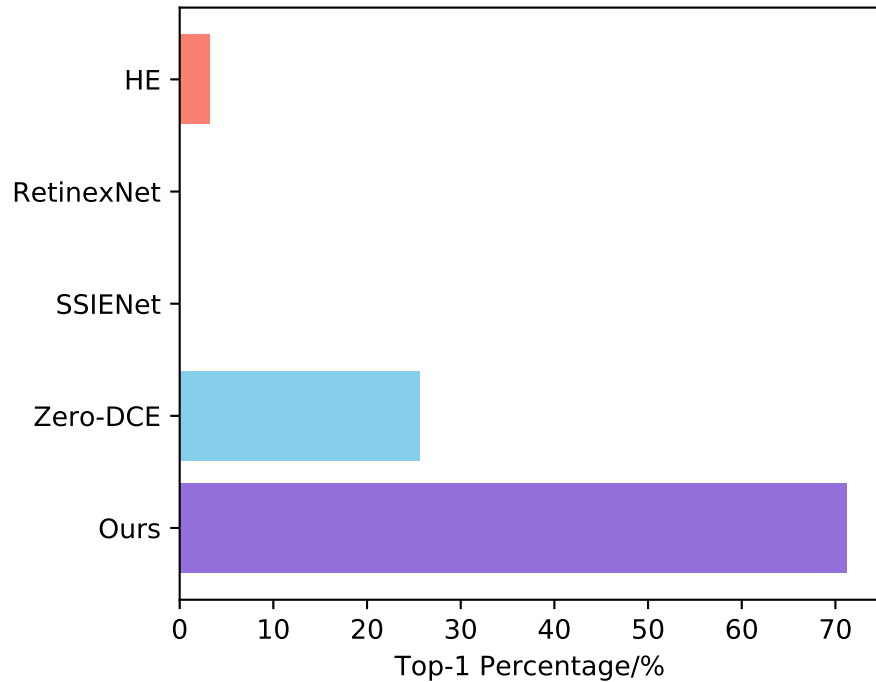

Vote-For-Best: #RefColor

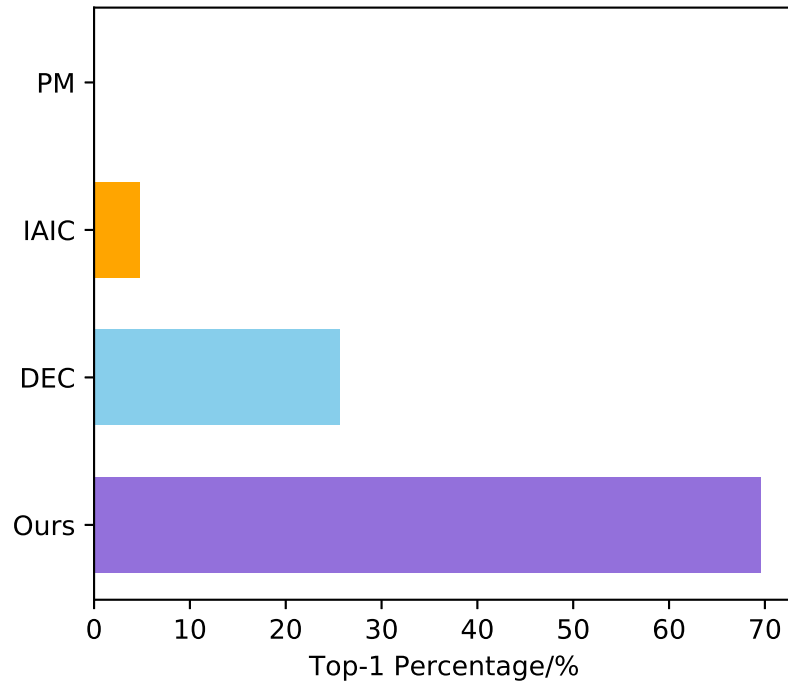

Vote-For-Best: #RefSR

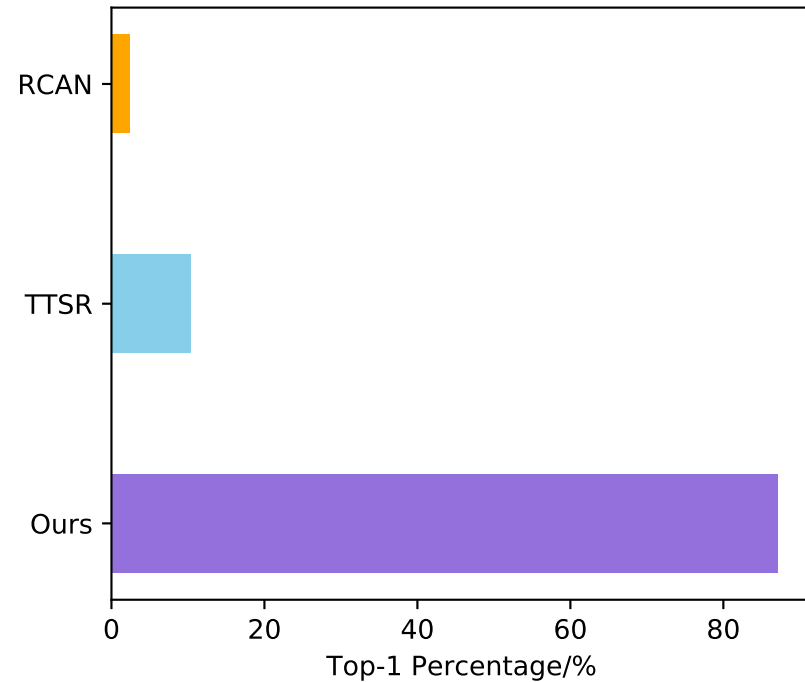

Supplement: Supplementary file 2 [file Guo_Low-light_Color_Imaging_ACCV_2020_supplemental.zip]

Overlap

Input-color(x4)

Input-mono

w/o RefColor

w/o RefEC

Overall

GT

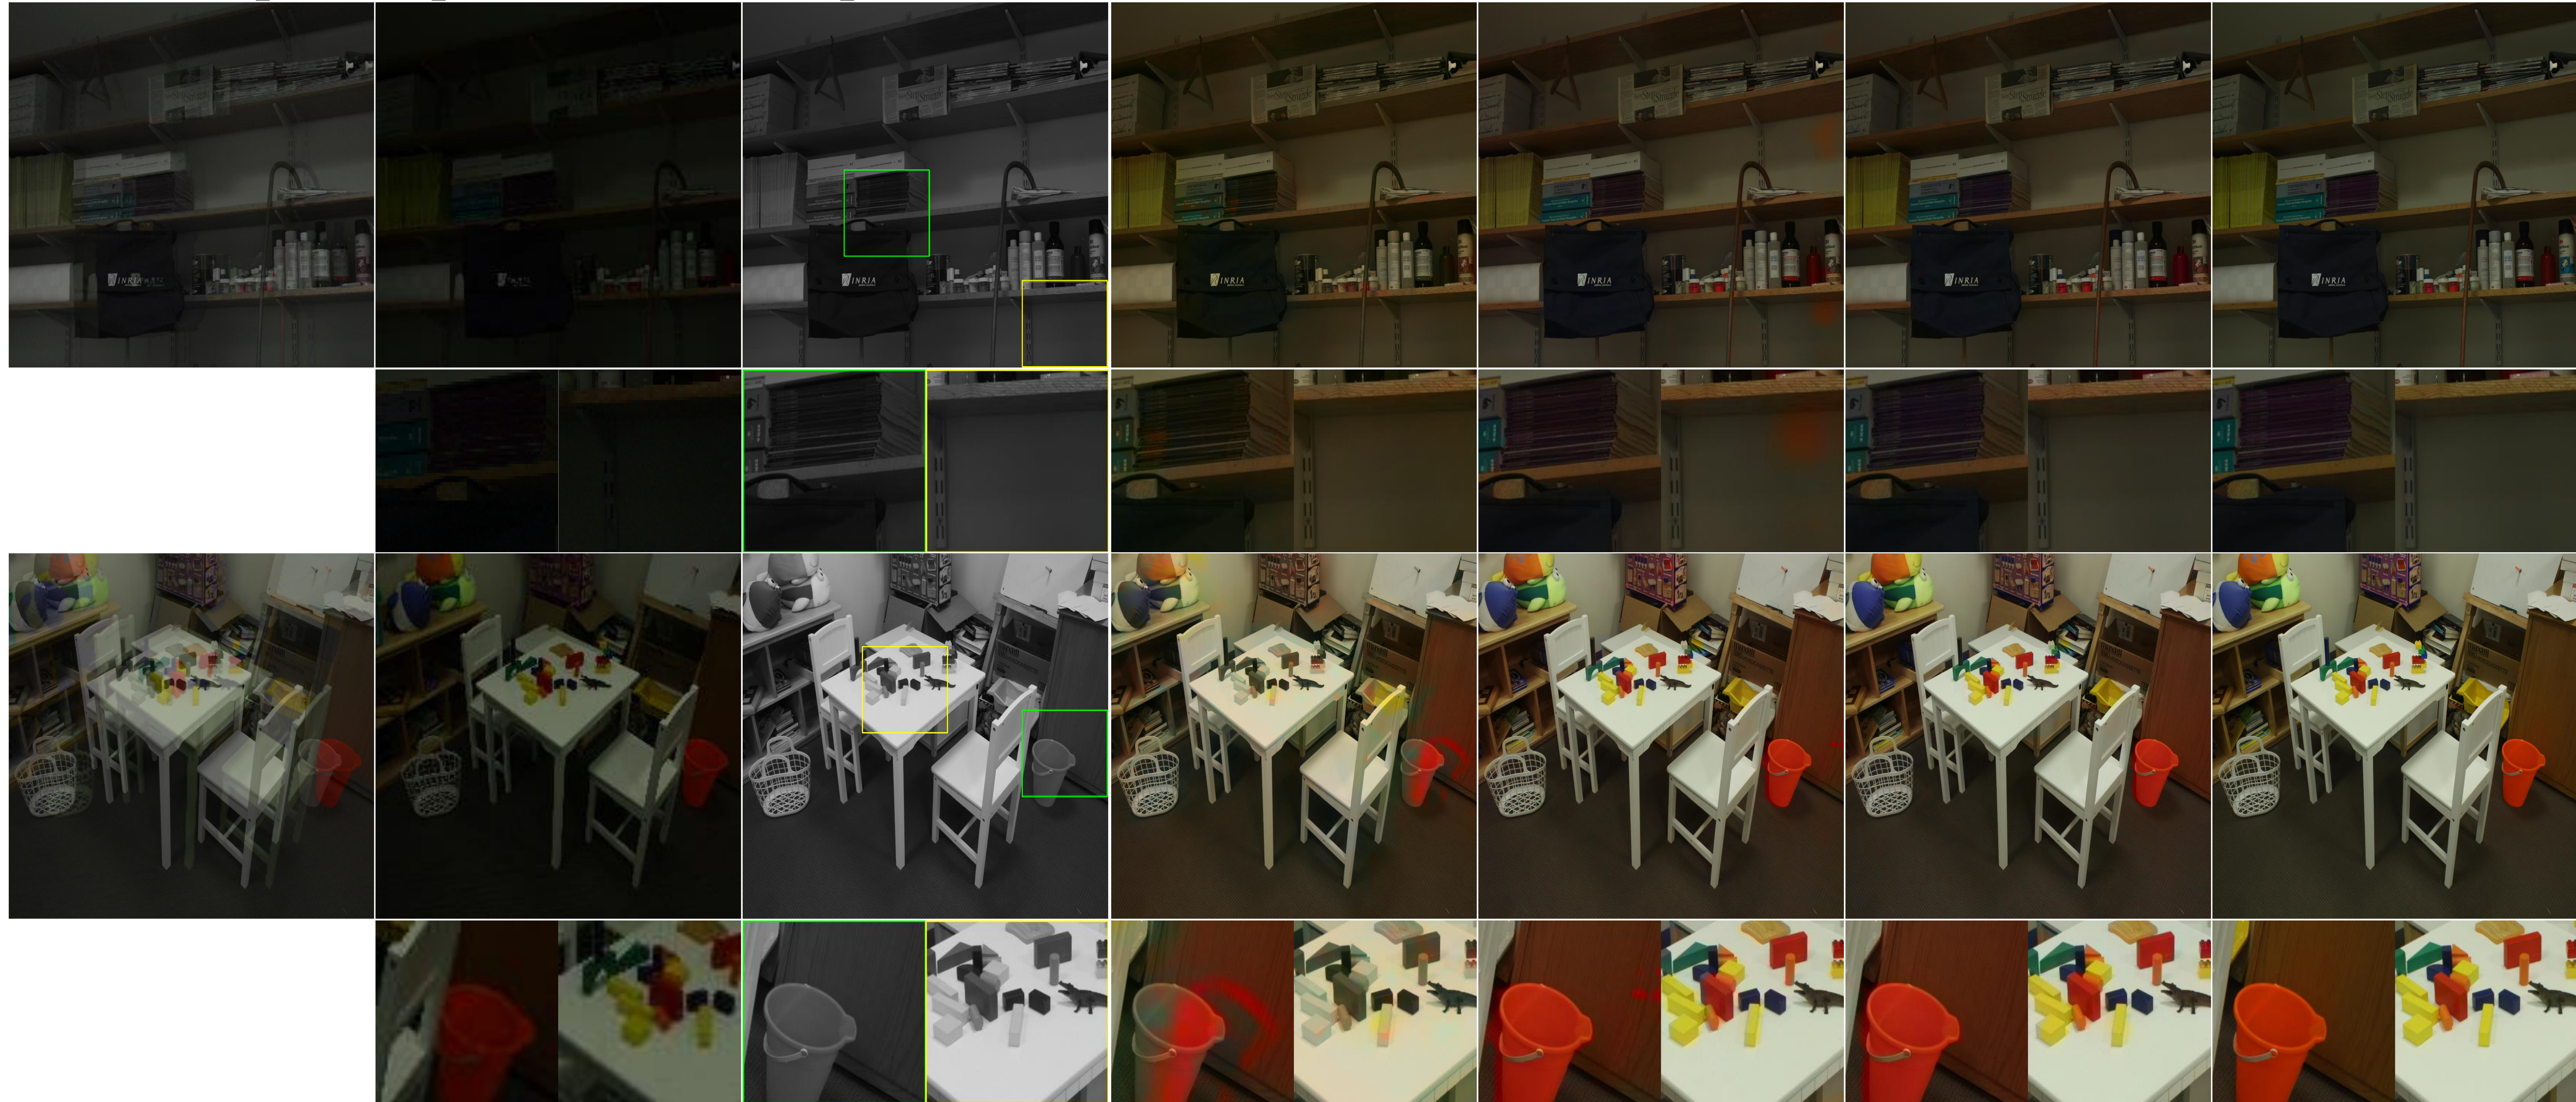

Supplement: Supplementary file 3 [file Guo_Low-light_Color_Imaging_ACCV_2020_supplemental.zip]

(a)

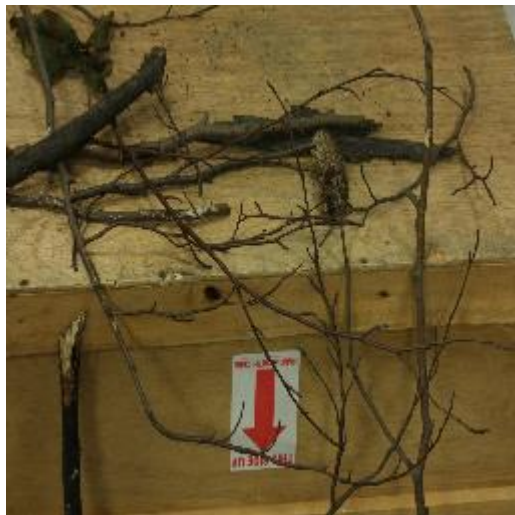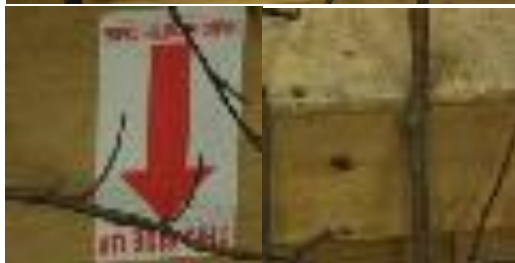

(b)

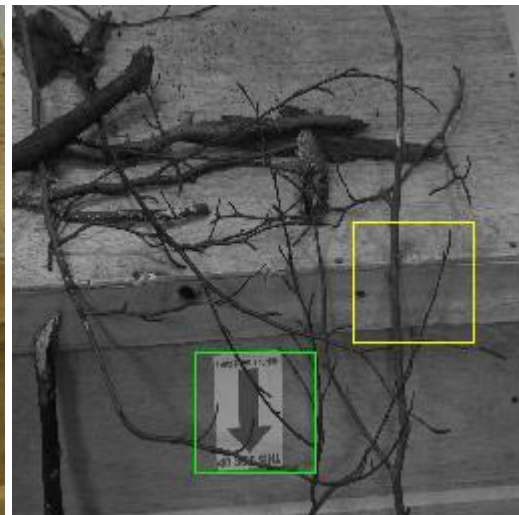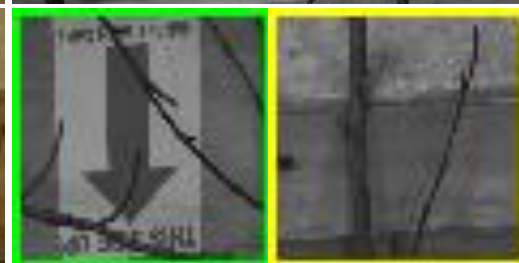

(c)

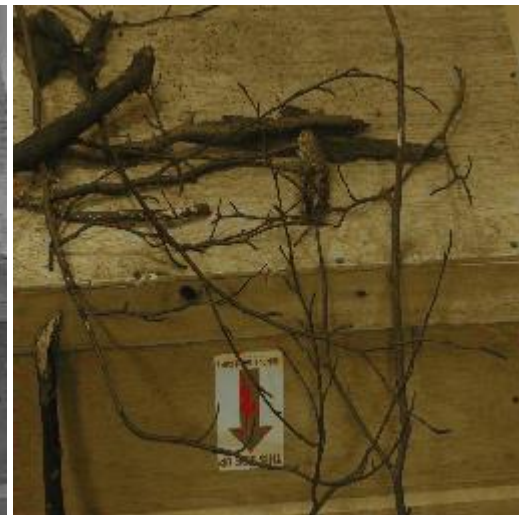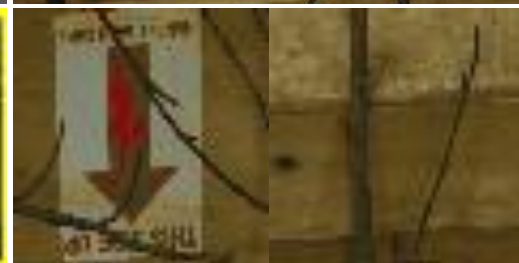

(d)

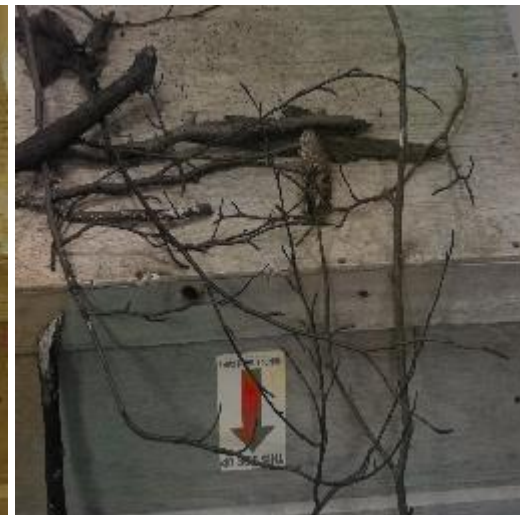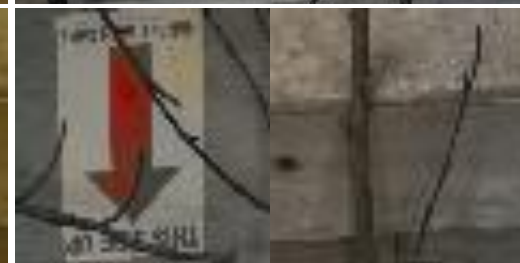

(e)

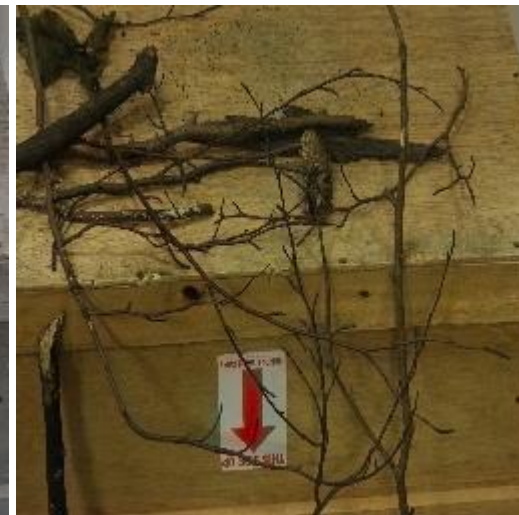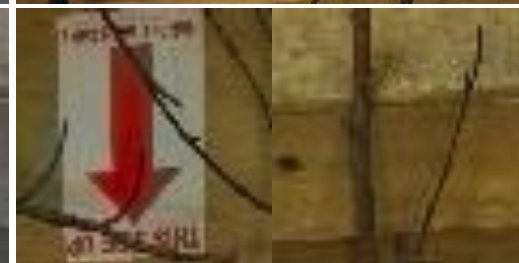

(f)

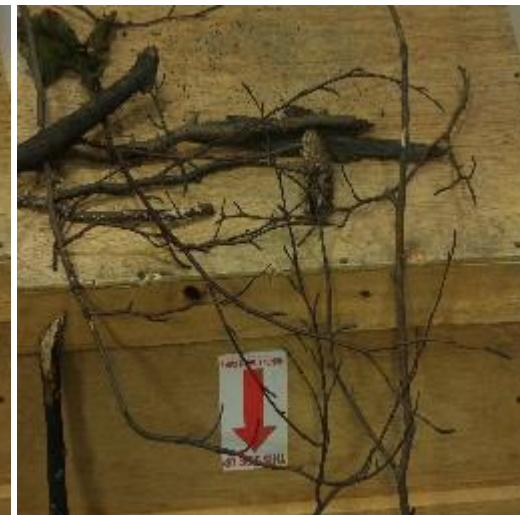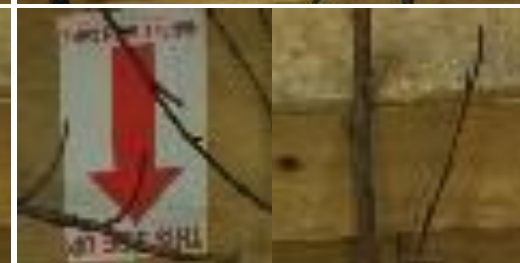

(g)

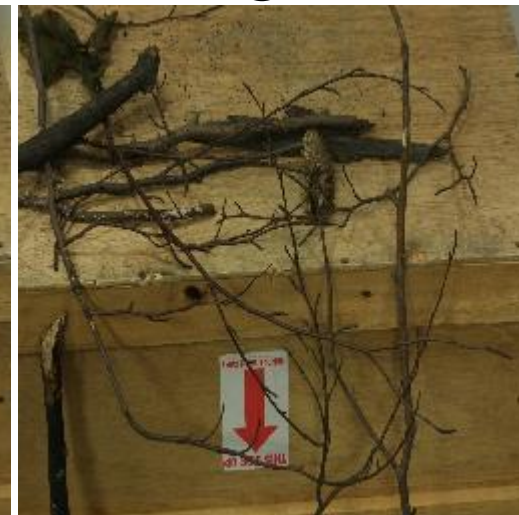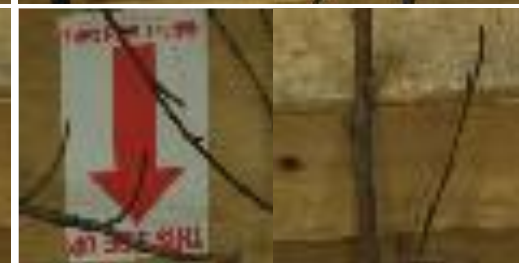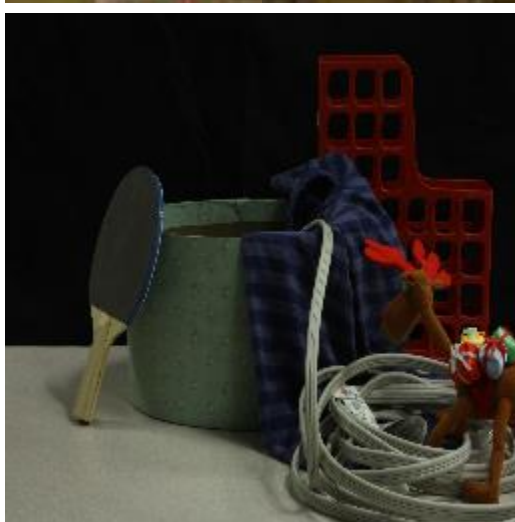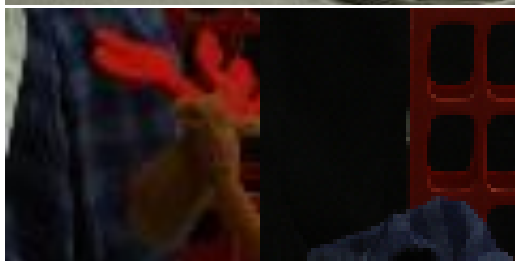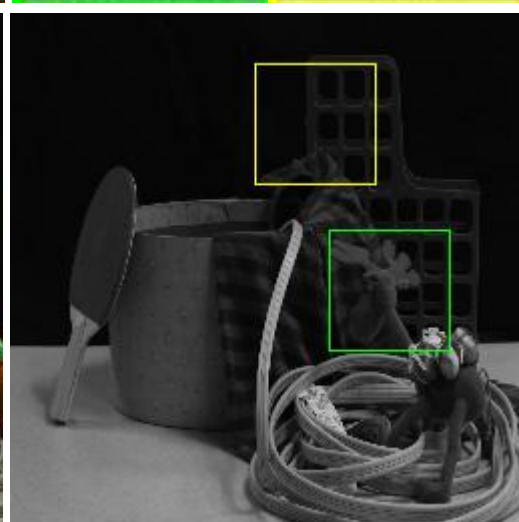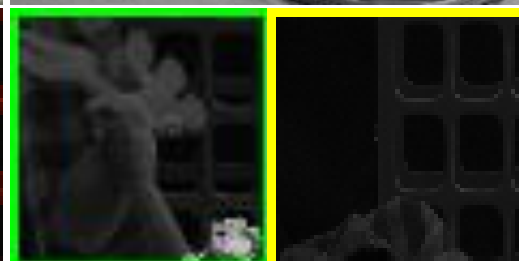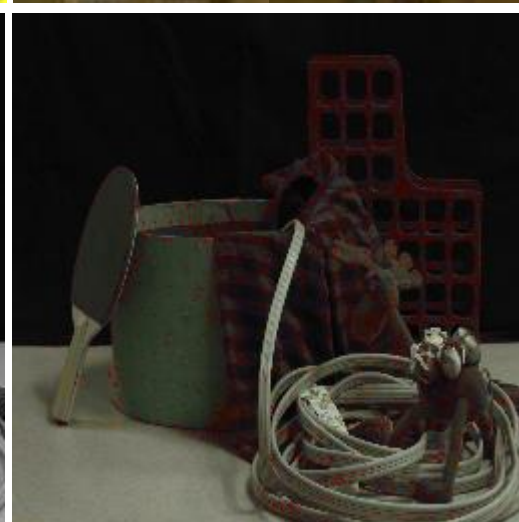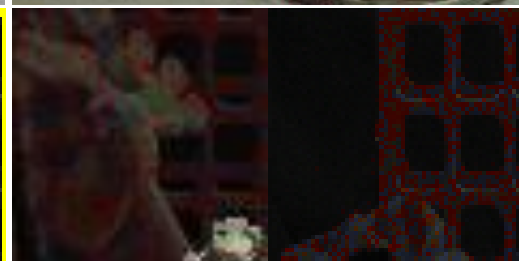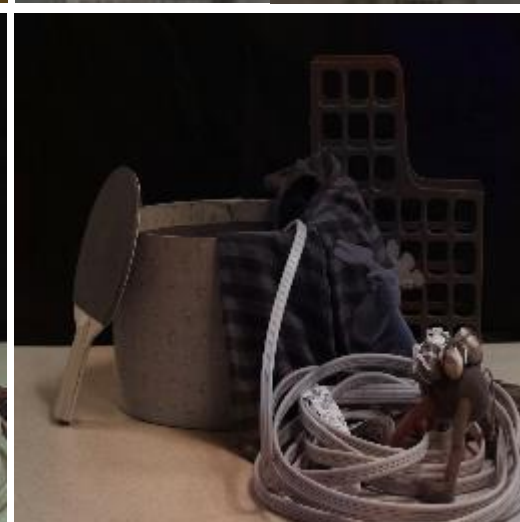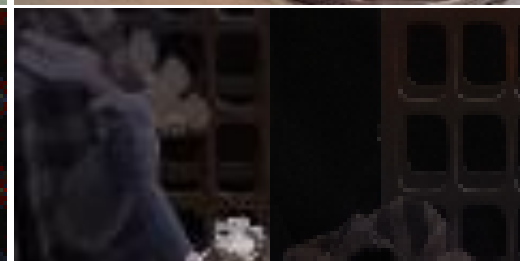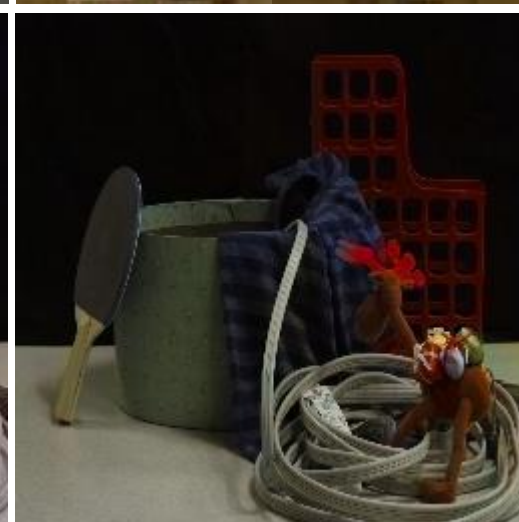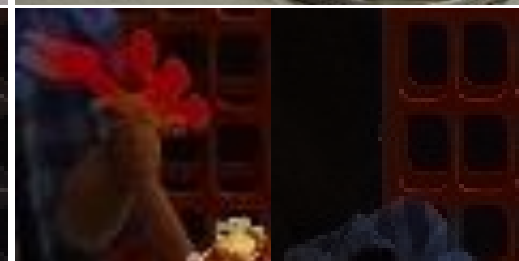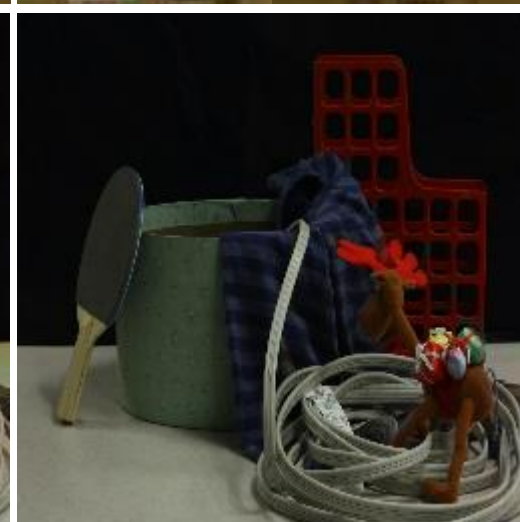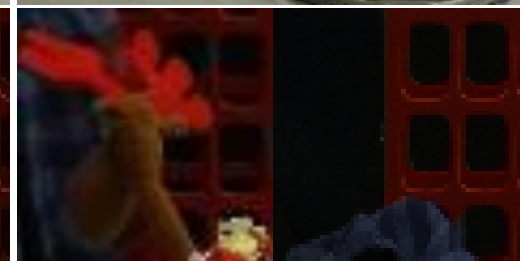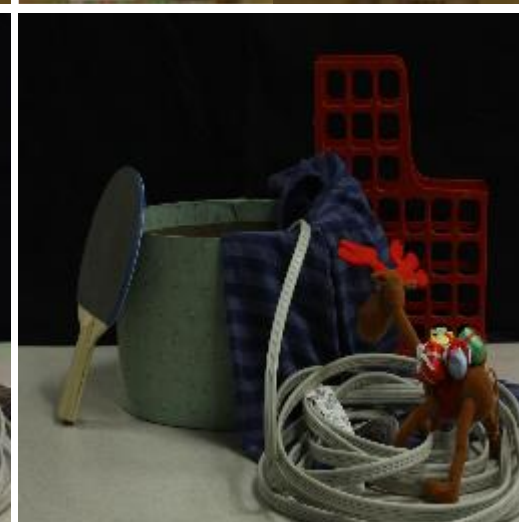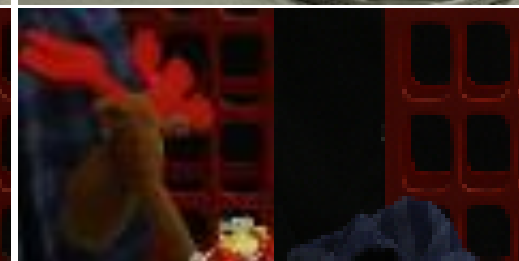

Supplement: Supplementary file 4 [file Guo_Low-light_Color_Imaging_ACCV_2020_supplemental.zip]

(a) Dual input pair

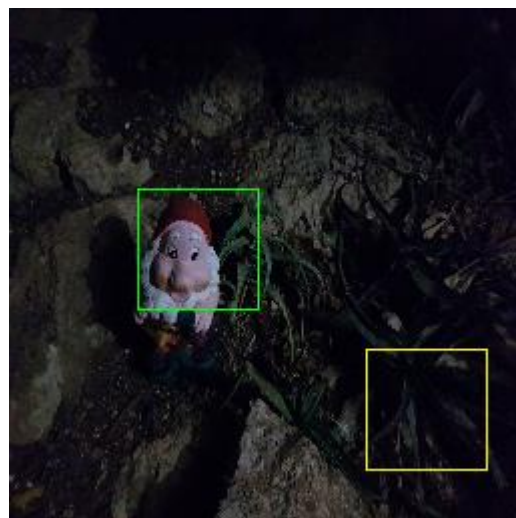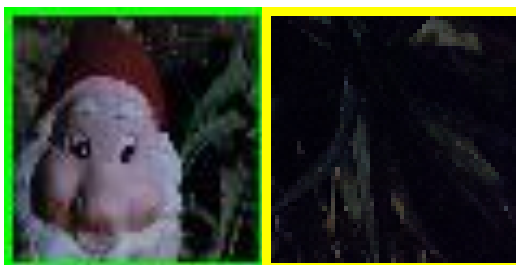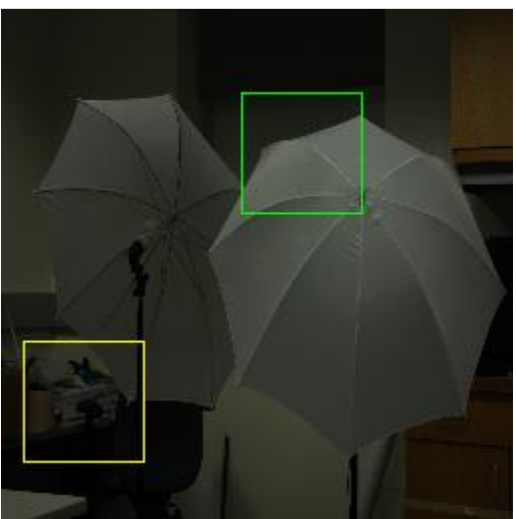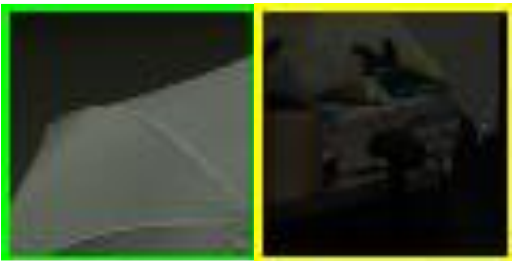

(b) HE

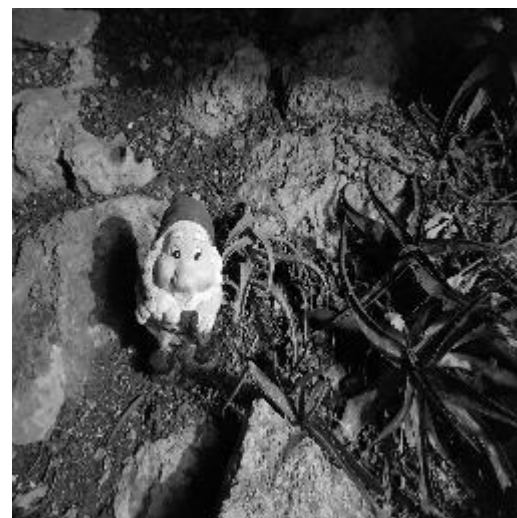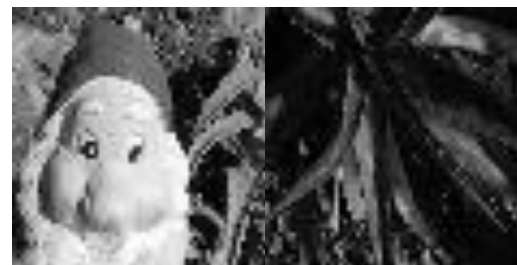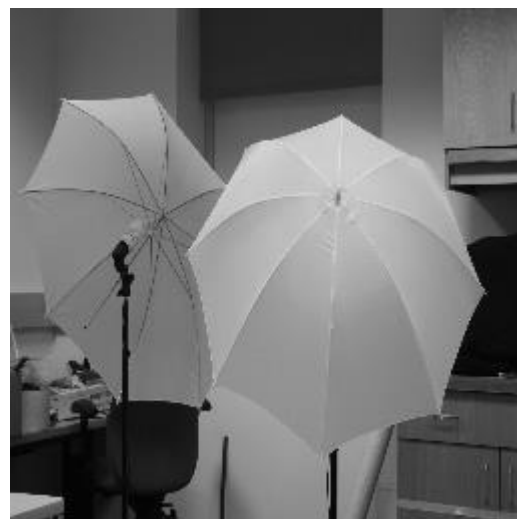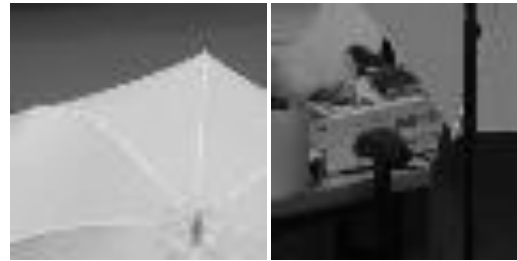

(c) RetinexNet

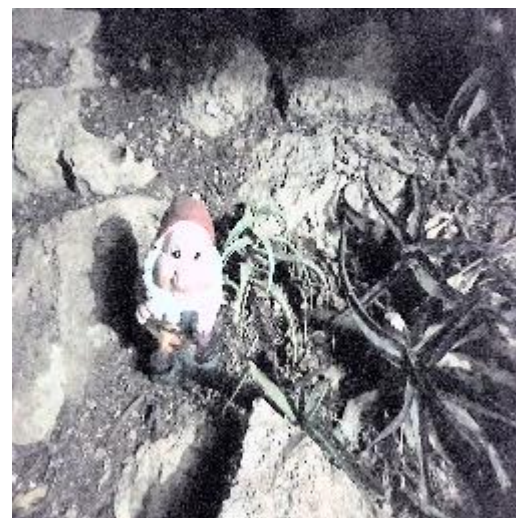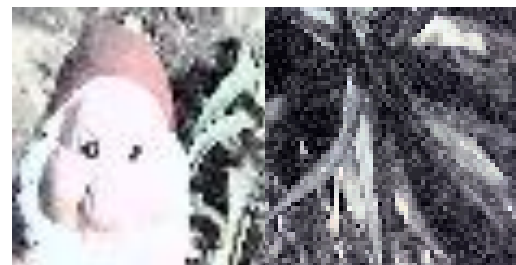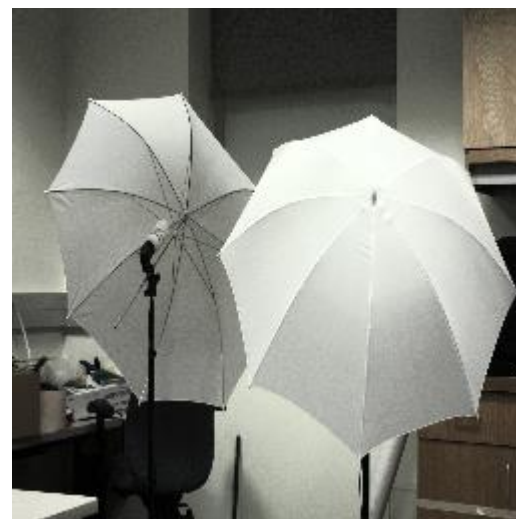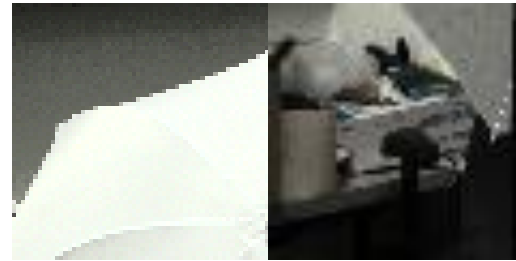

(d) SSIENet

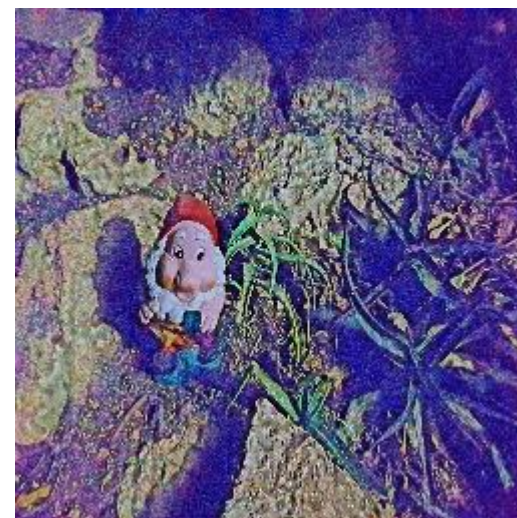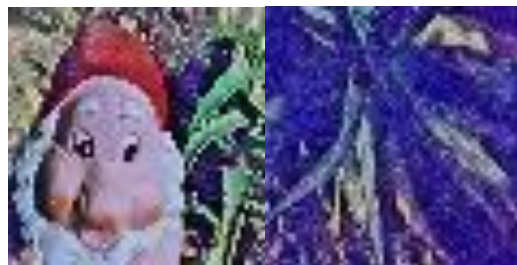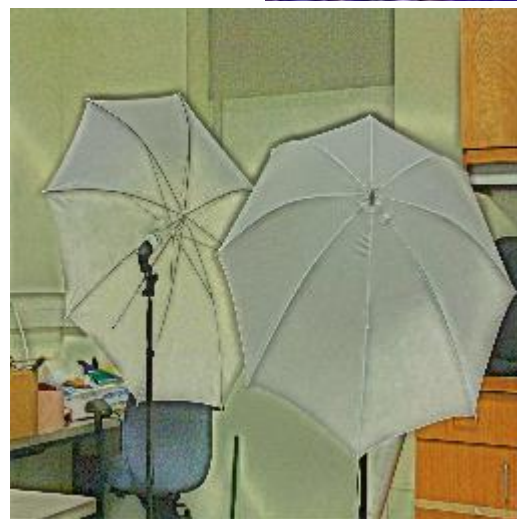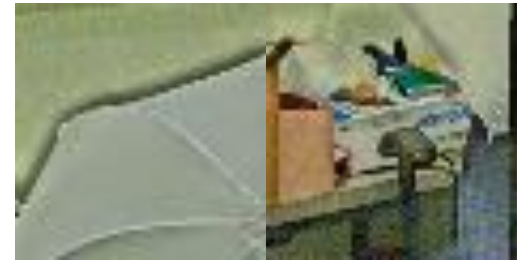

(e) Zero-DCE

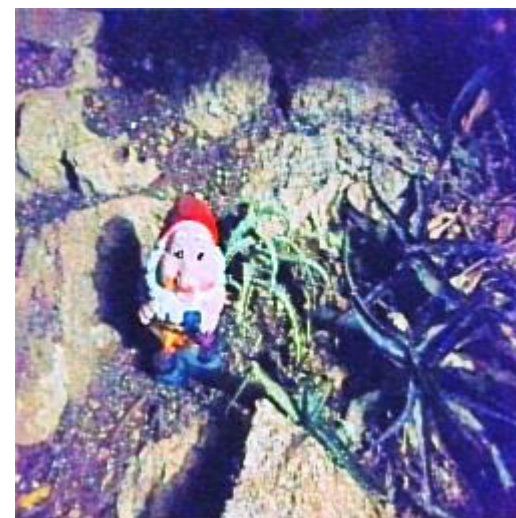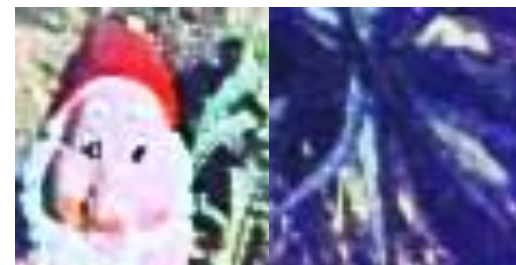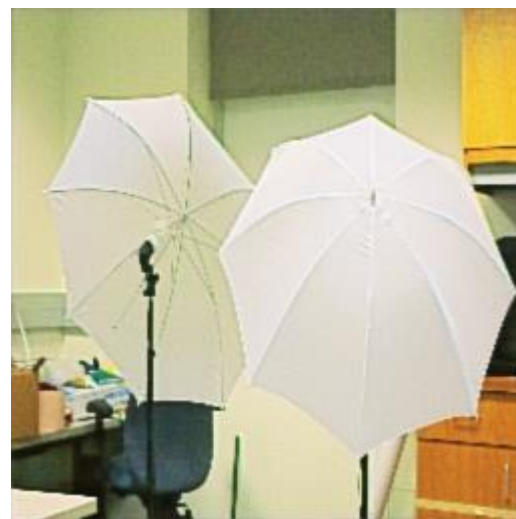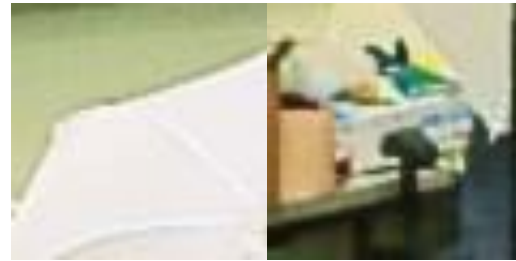

(f) Ours

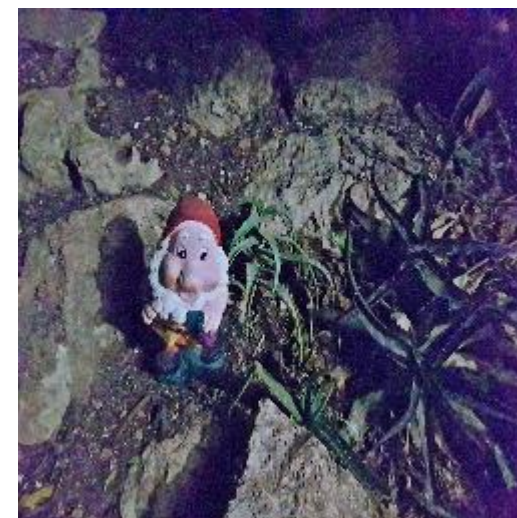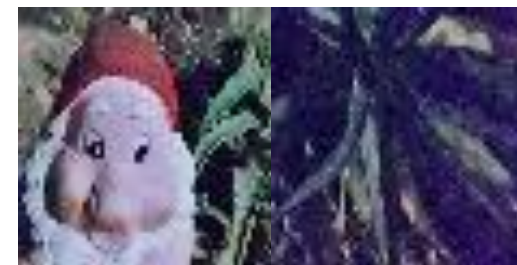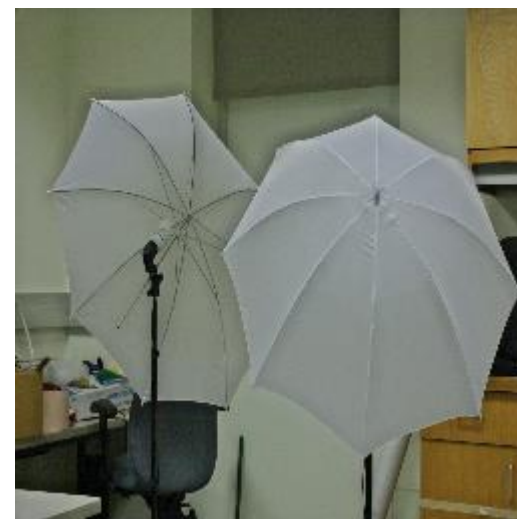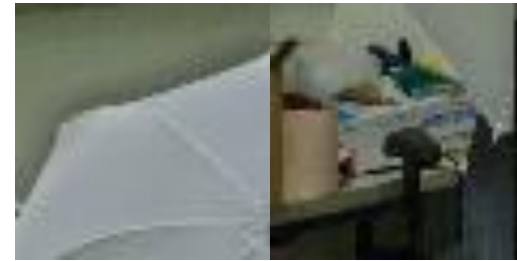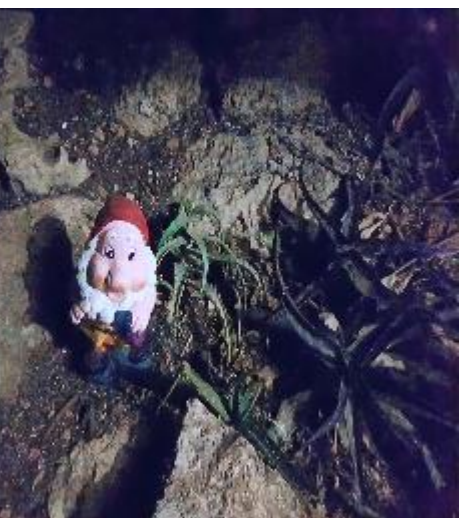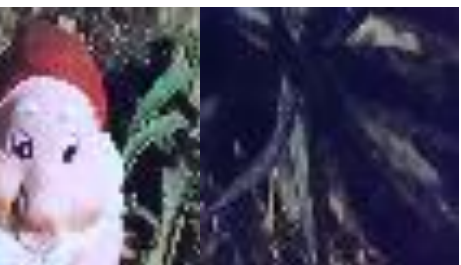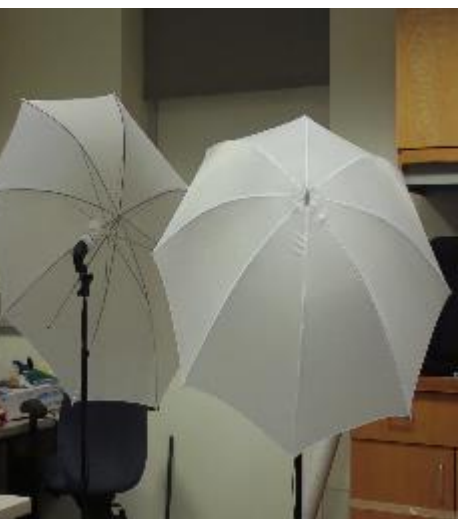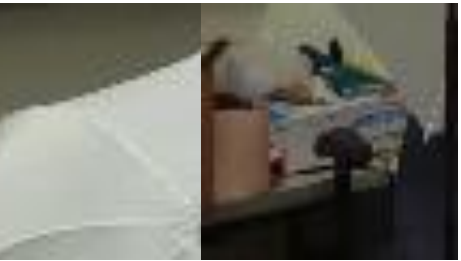

(g) GT

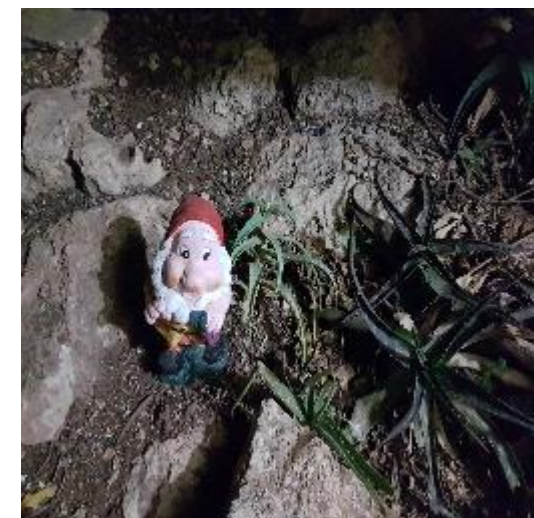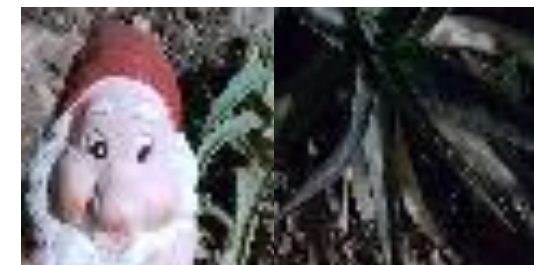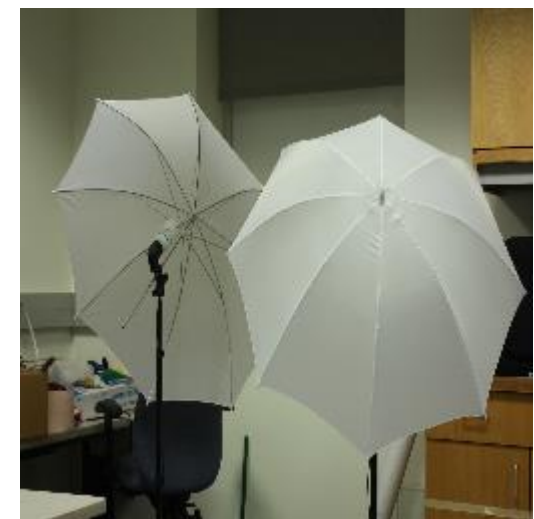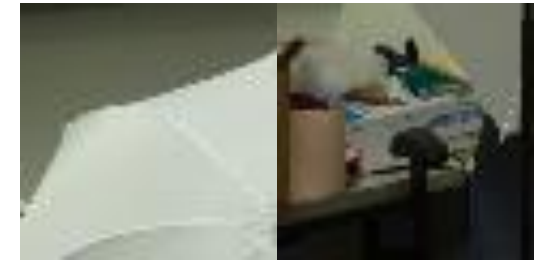

Supplement: Supplementary file 6 [file Guo_Low-light_Color_Imaging_ACCV_2020_supplemental.zip]

(a)

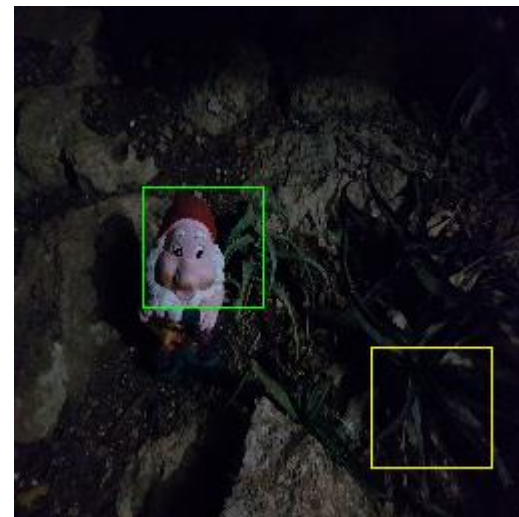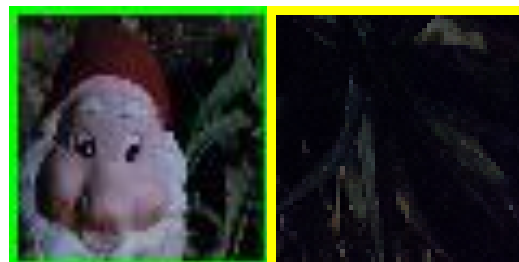

(b)

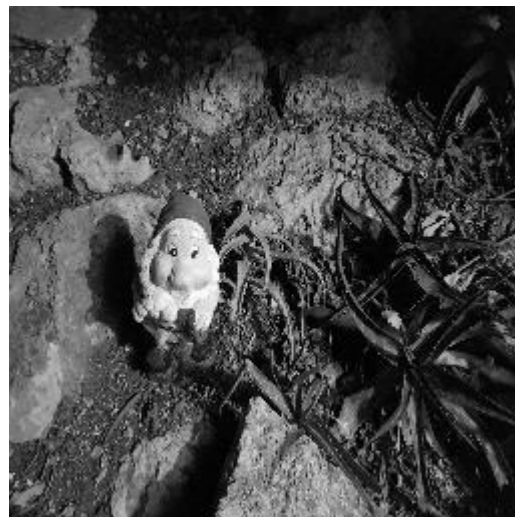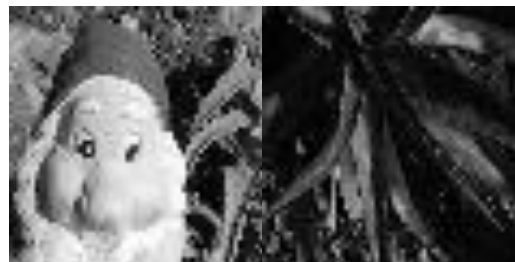

(c)

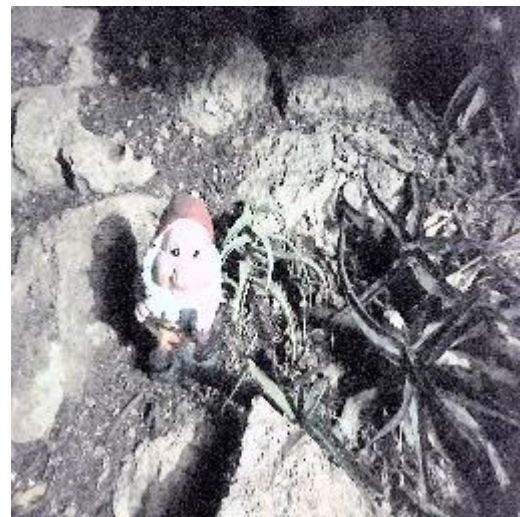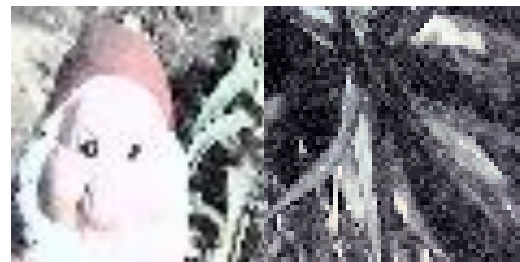

(d)

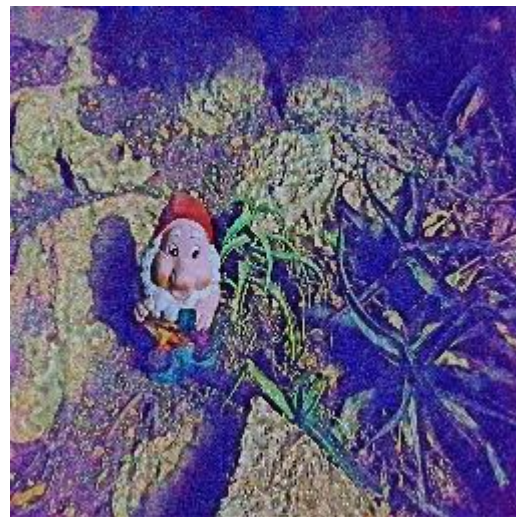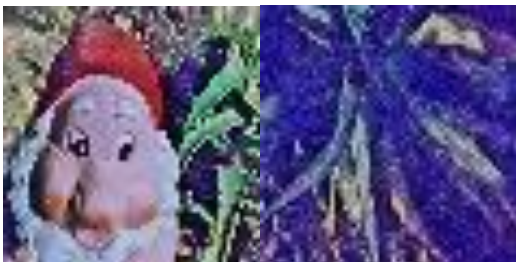

(e)

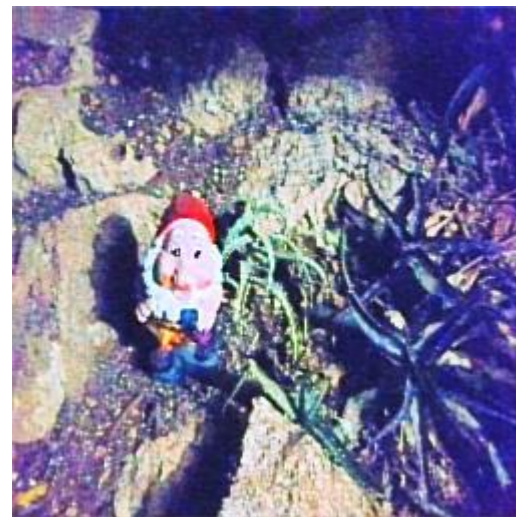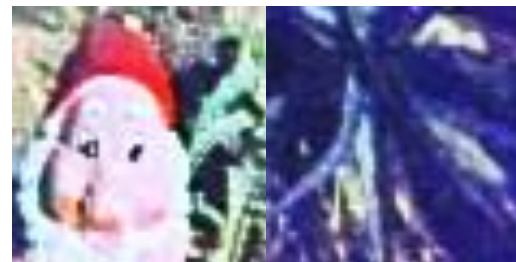

(f)

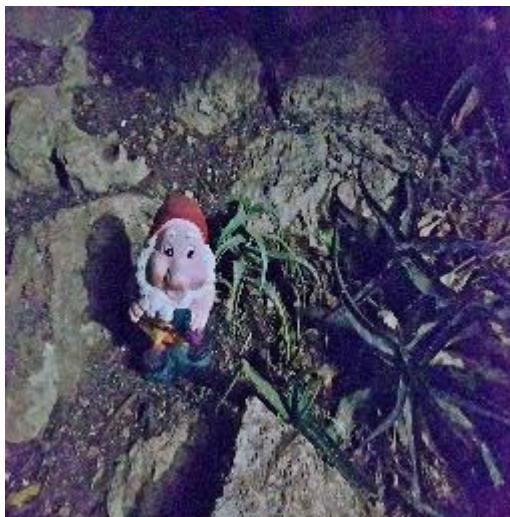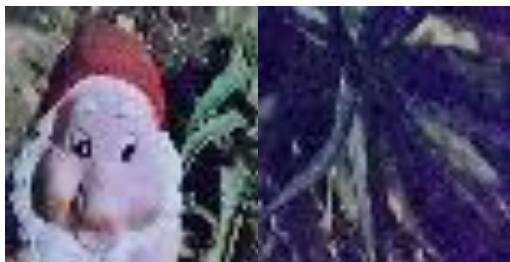

(g)

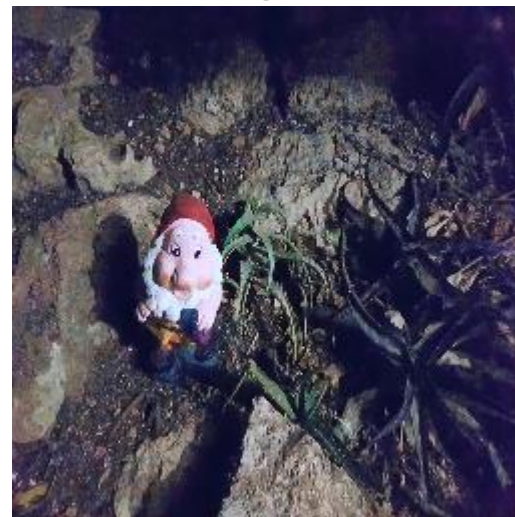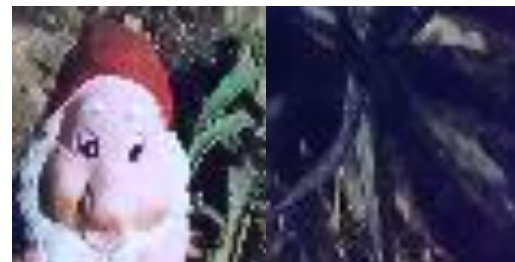

(h)

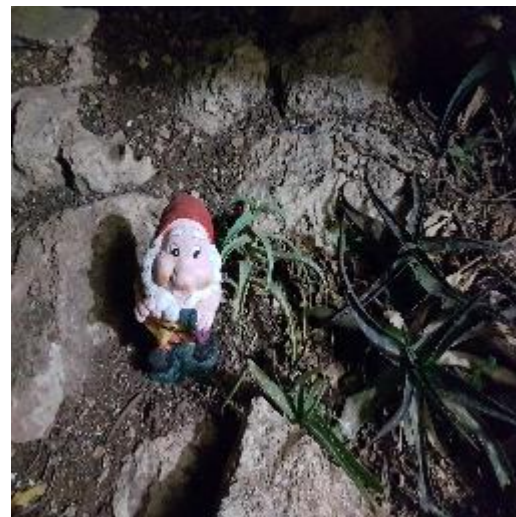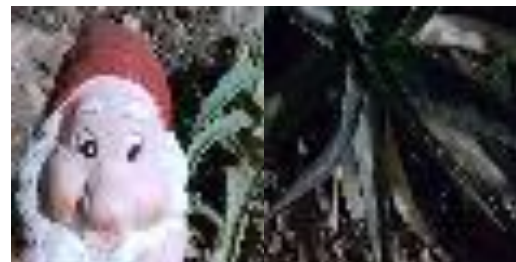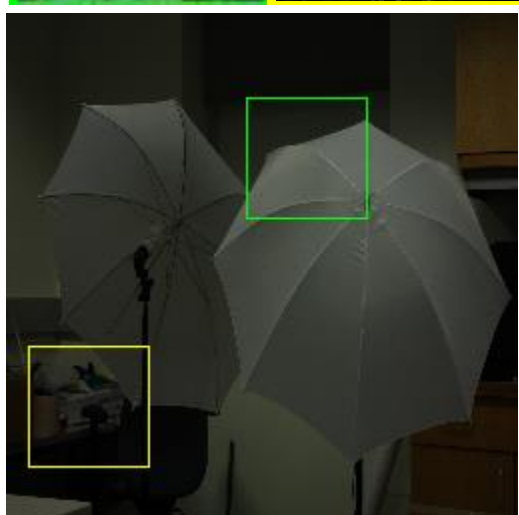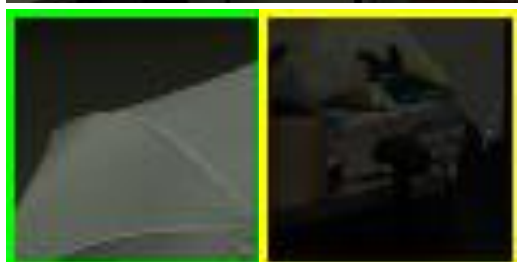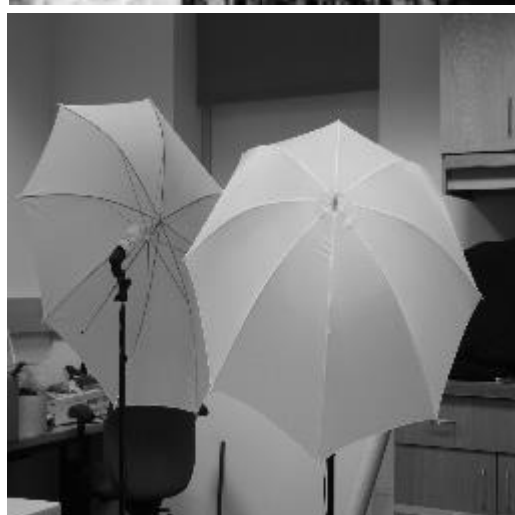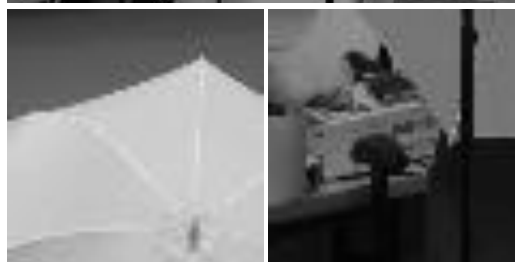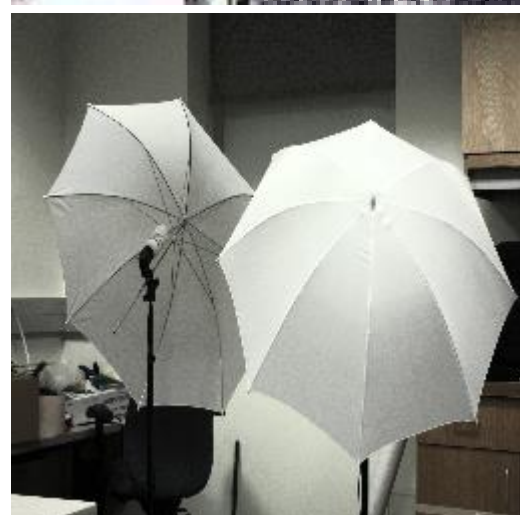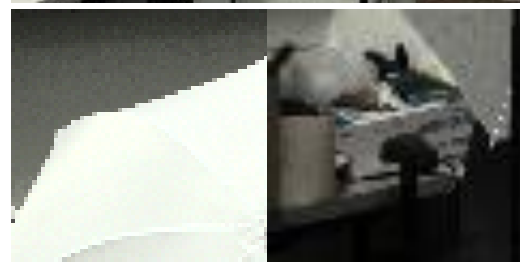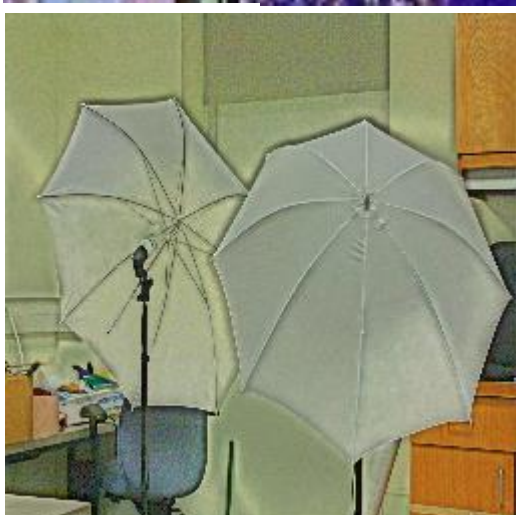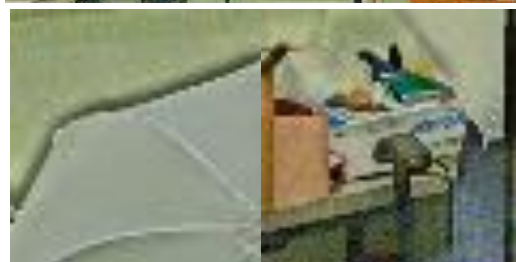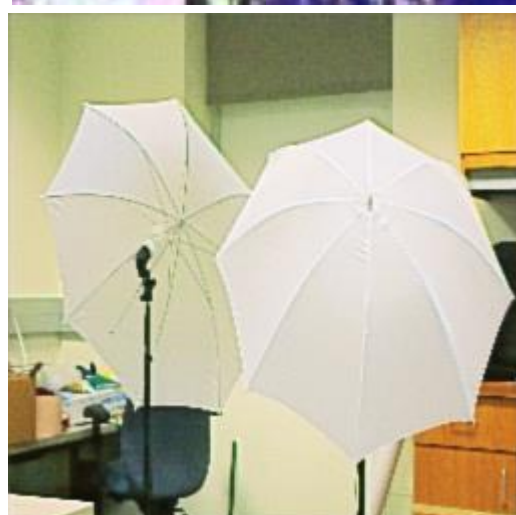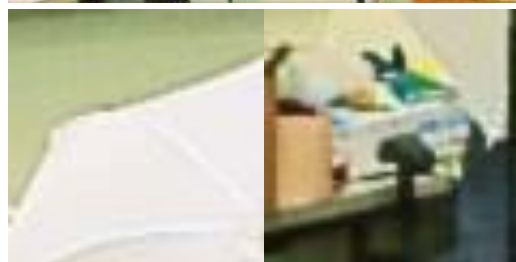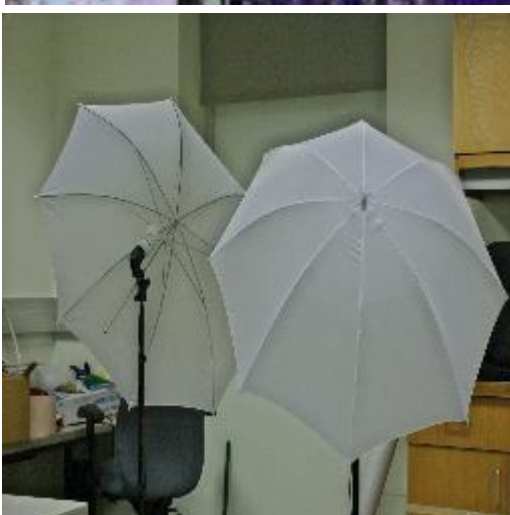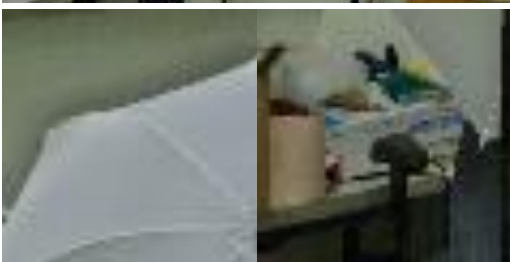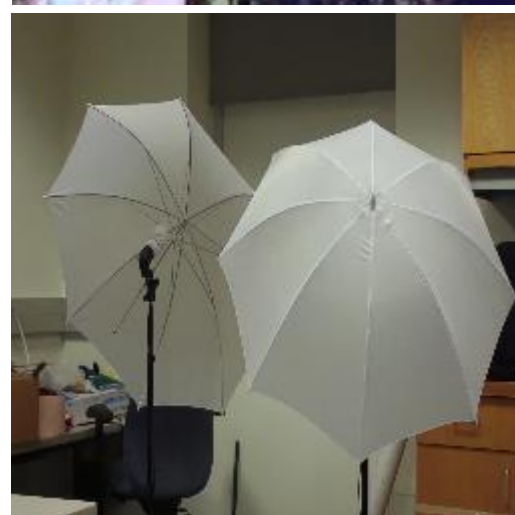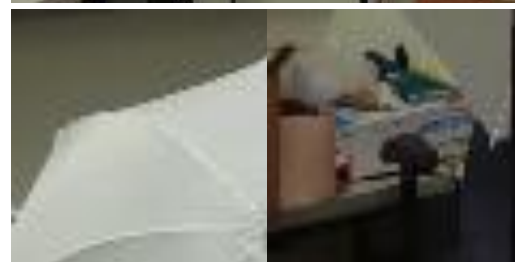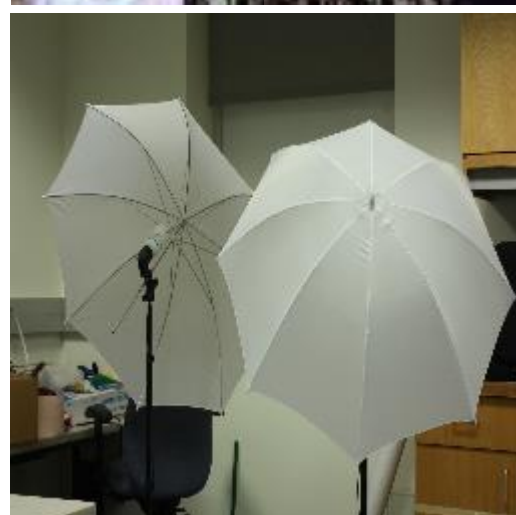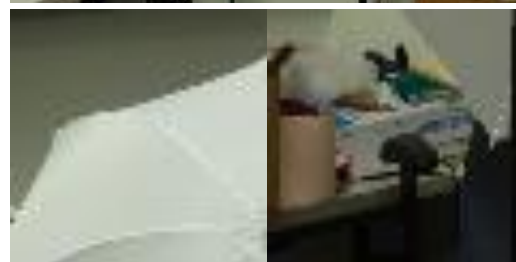

Supplement: Supplementary file 7 [file Guo_Low-light_Color_Imaging_ACCV_2020_supplemental.zip]

(a)

(b)

(c)

(d)

(e)

(f)

(g)

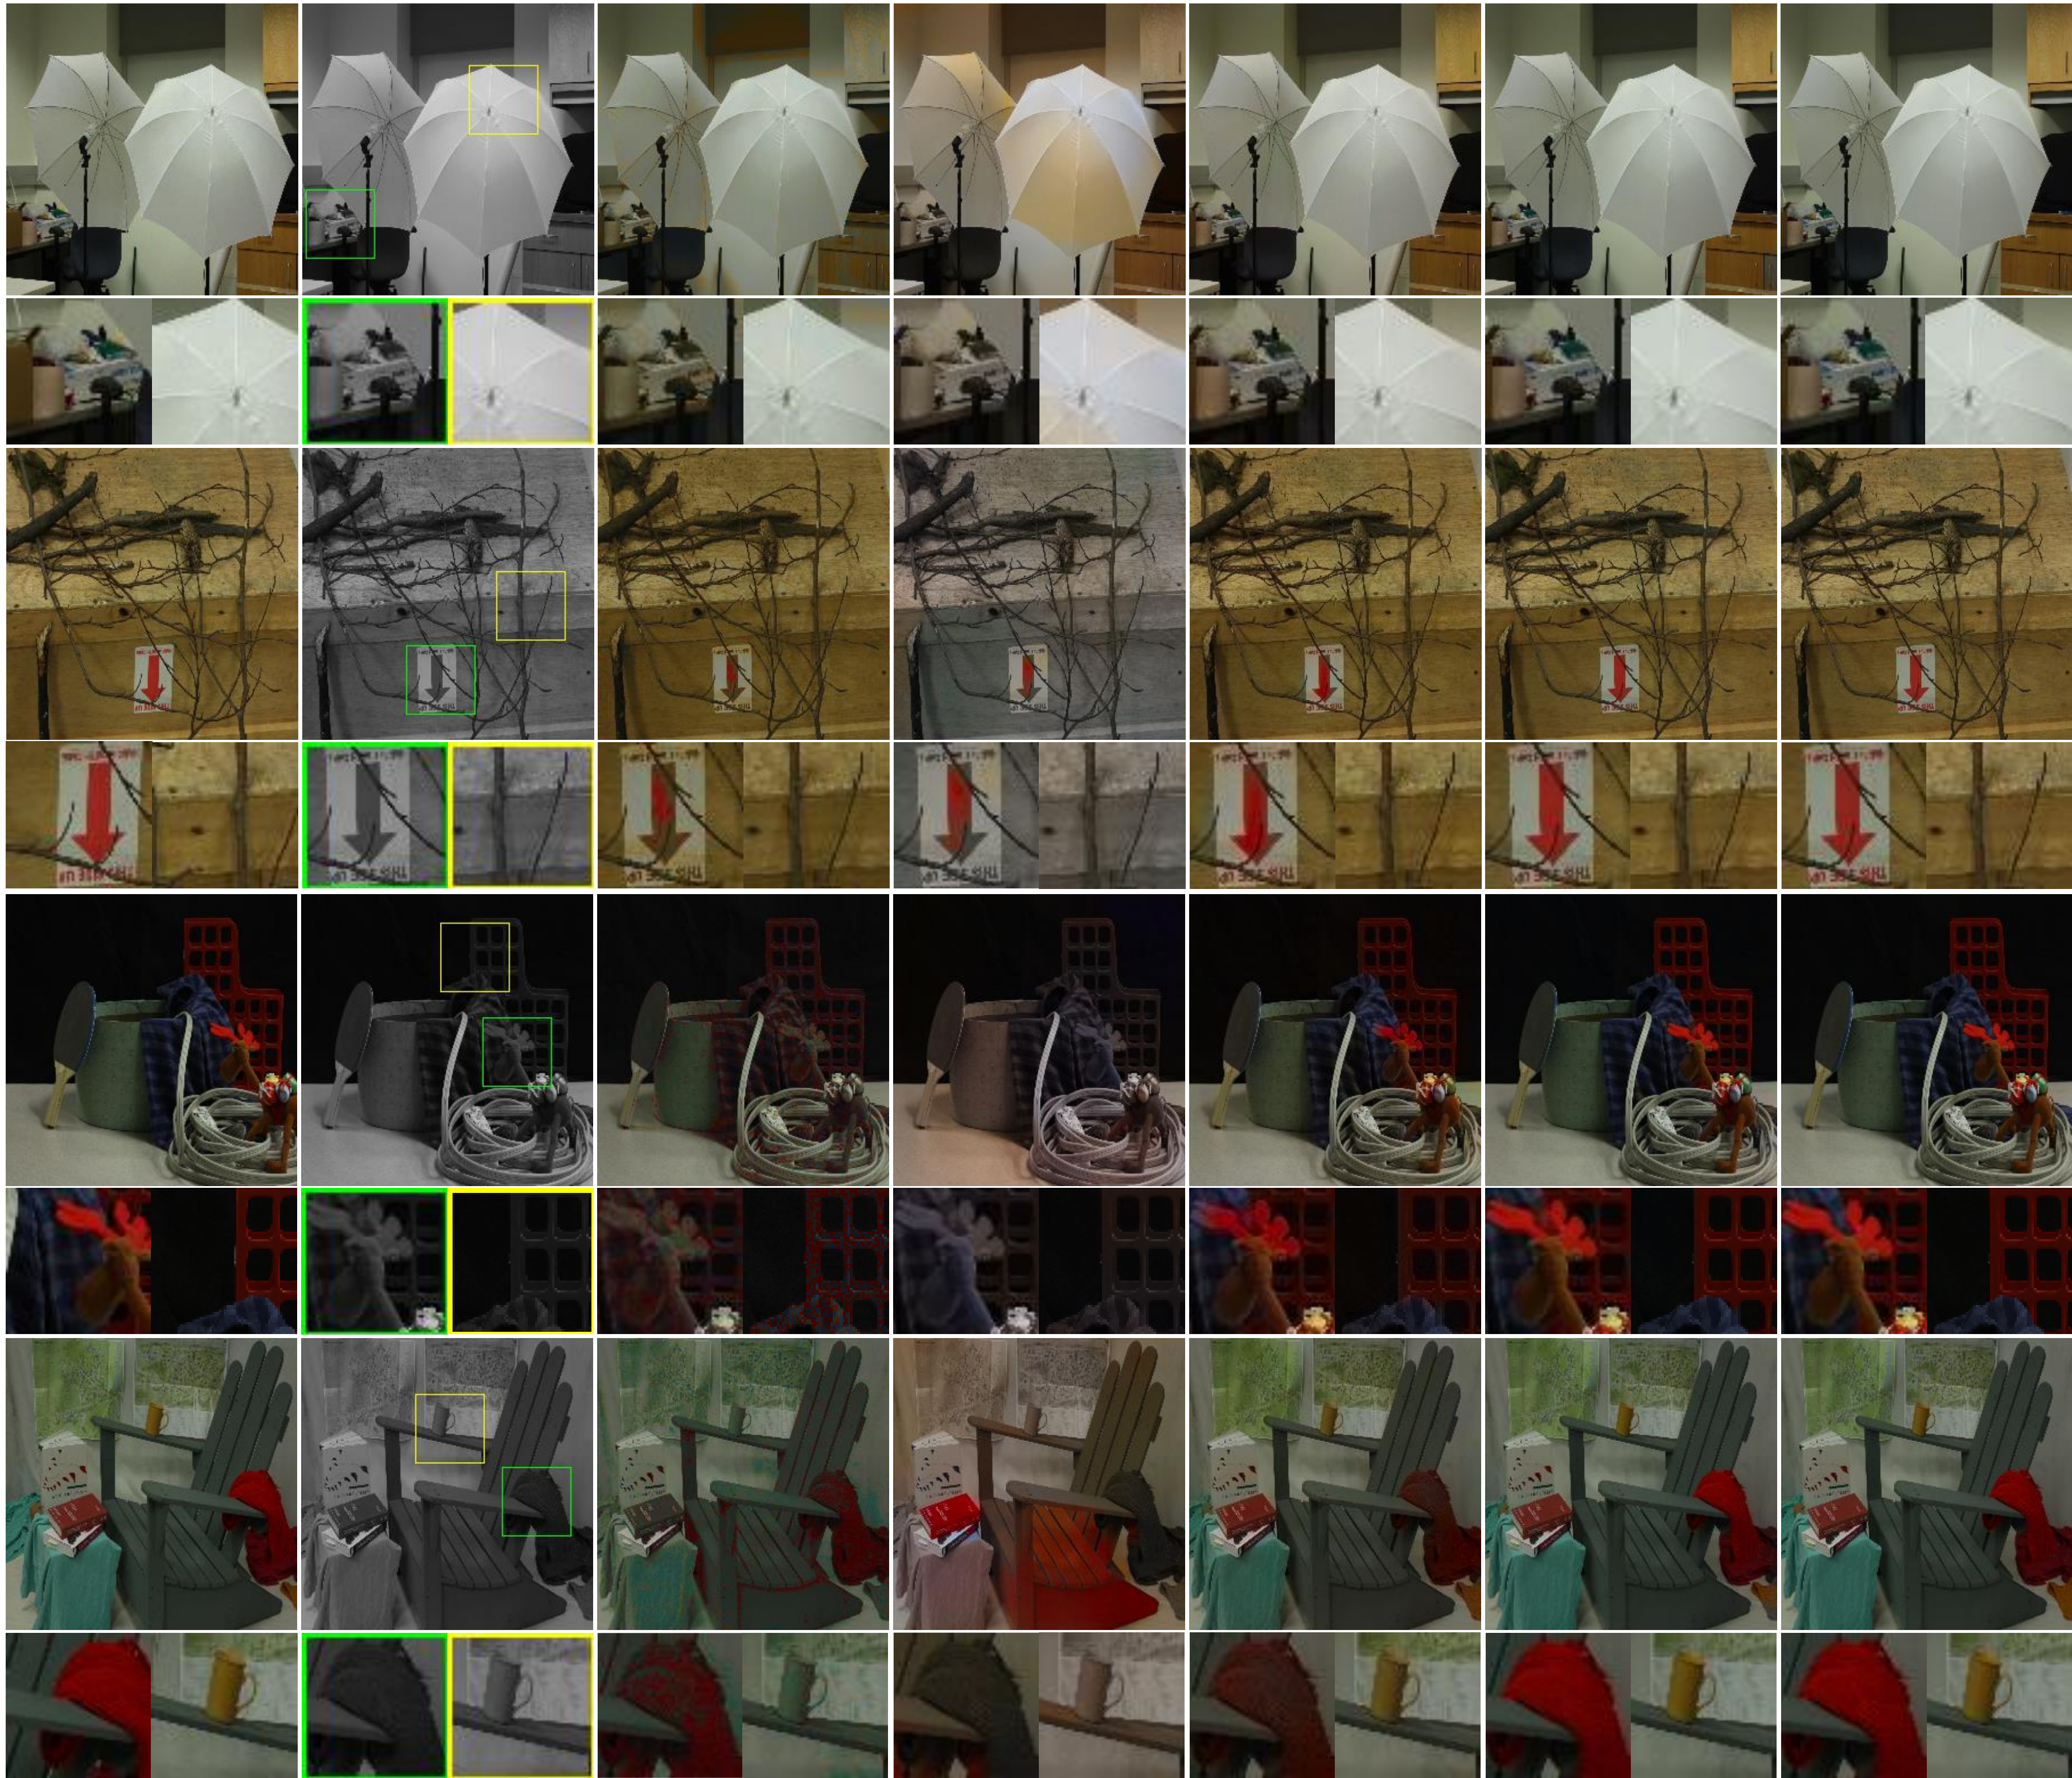

Supplement: Supplementary file 8 [file Guo_Low-light_Color_Imaging_ACCV_2020_supplemental.zip]

LSR Color

RefEC

RefColor

RefSR( $\times 1/4$ )

Detail

Separative

Overall

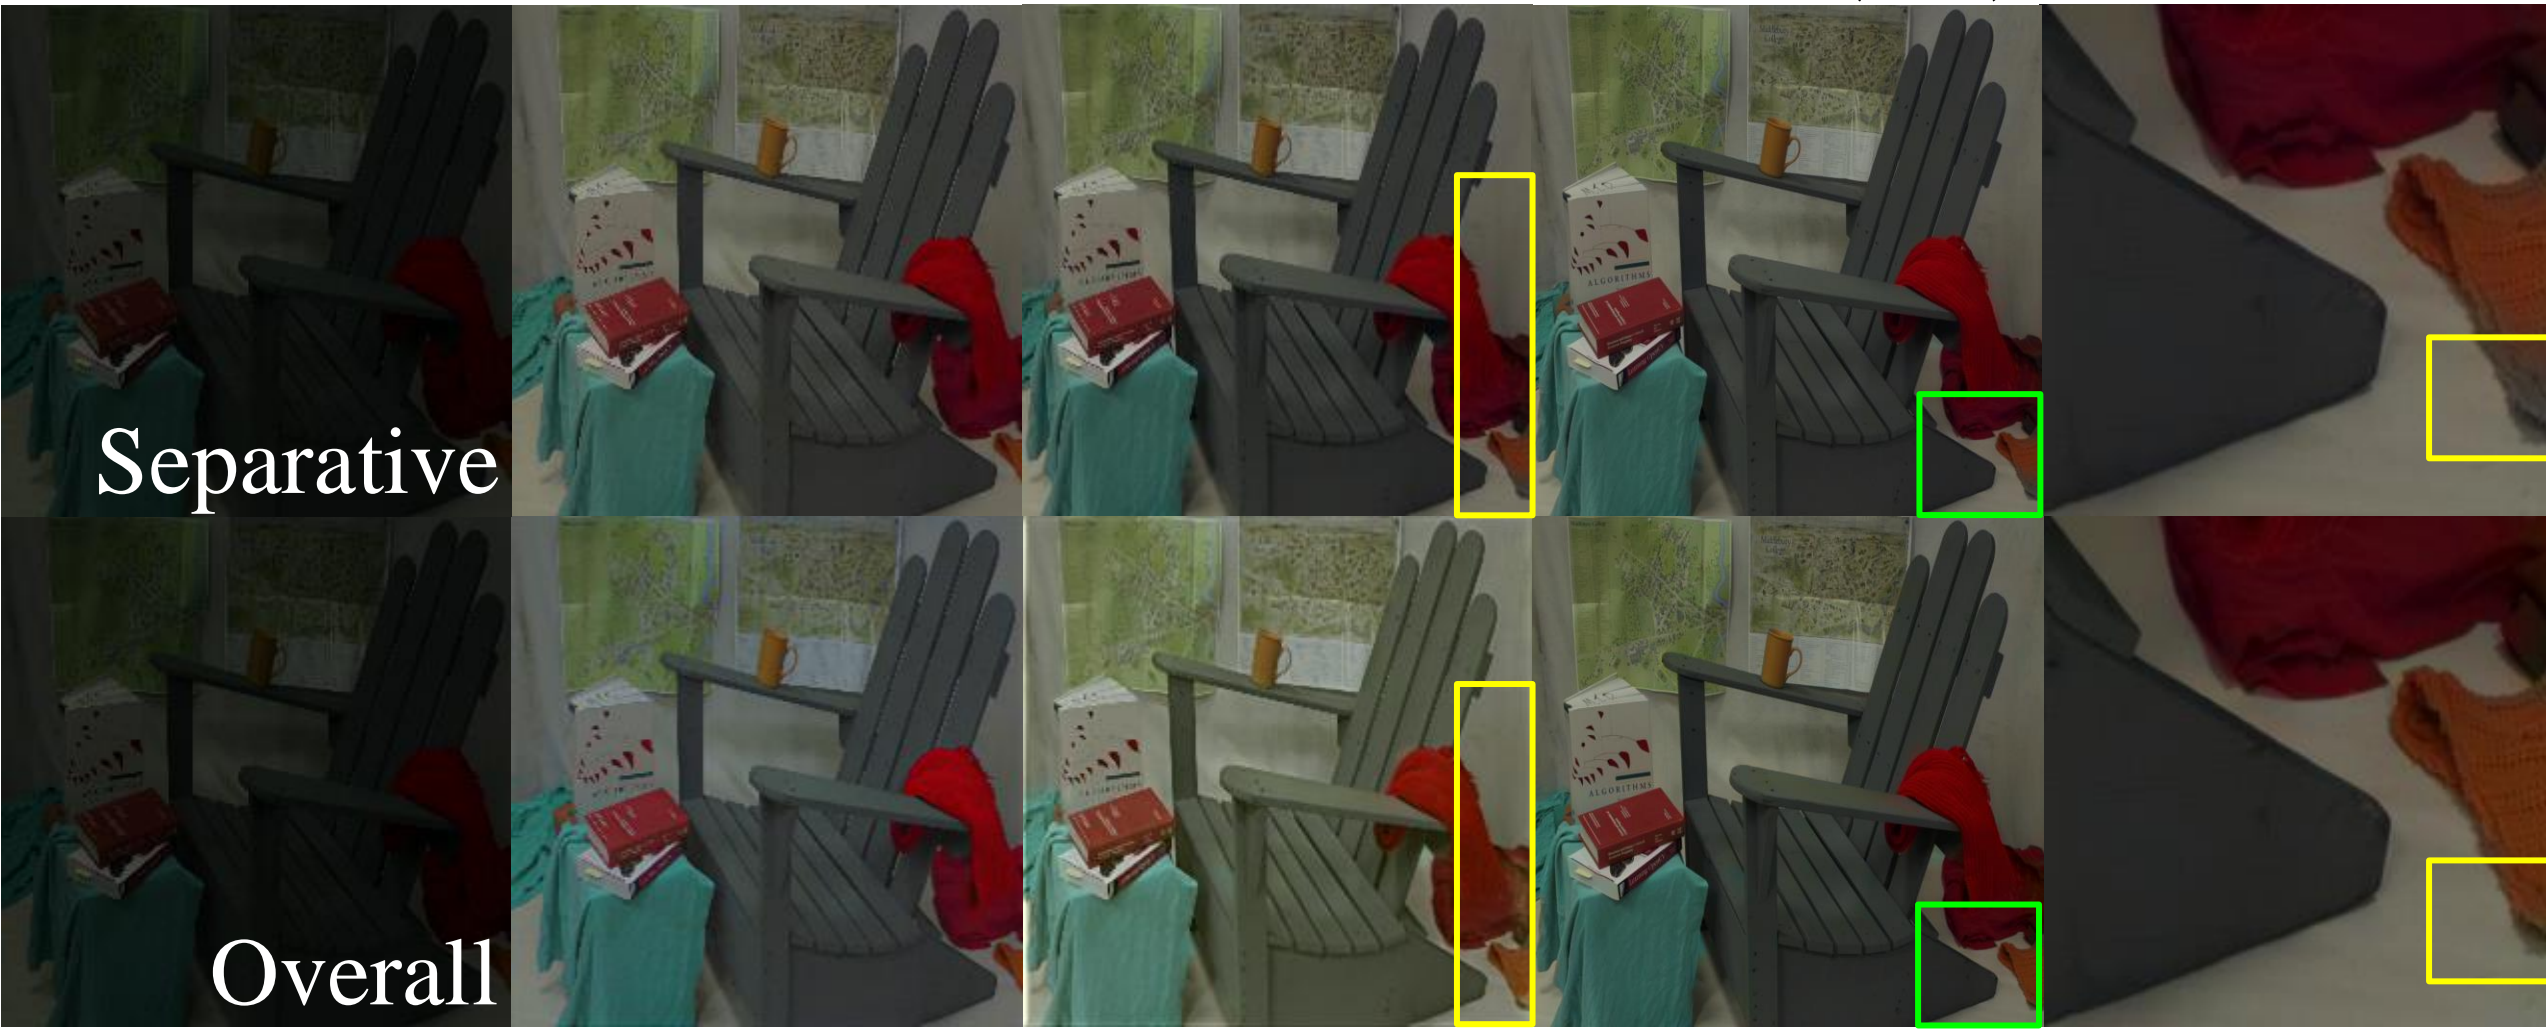

Supplement: Supplementary file 9 [file Guo_Low-light_Color_Imaging_ACCV_2020_supplemental.zip]

(a)

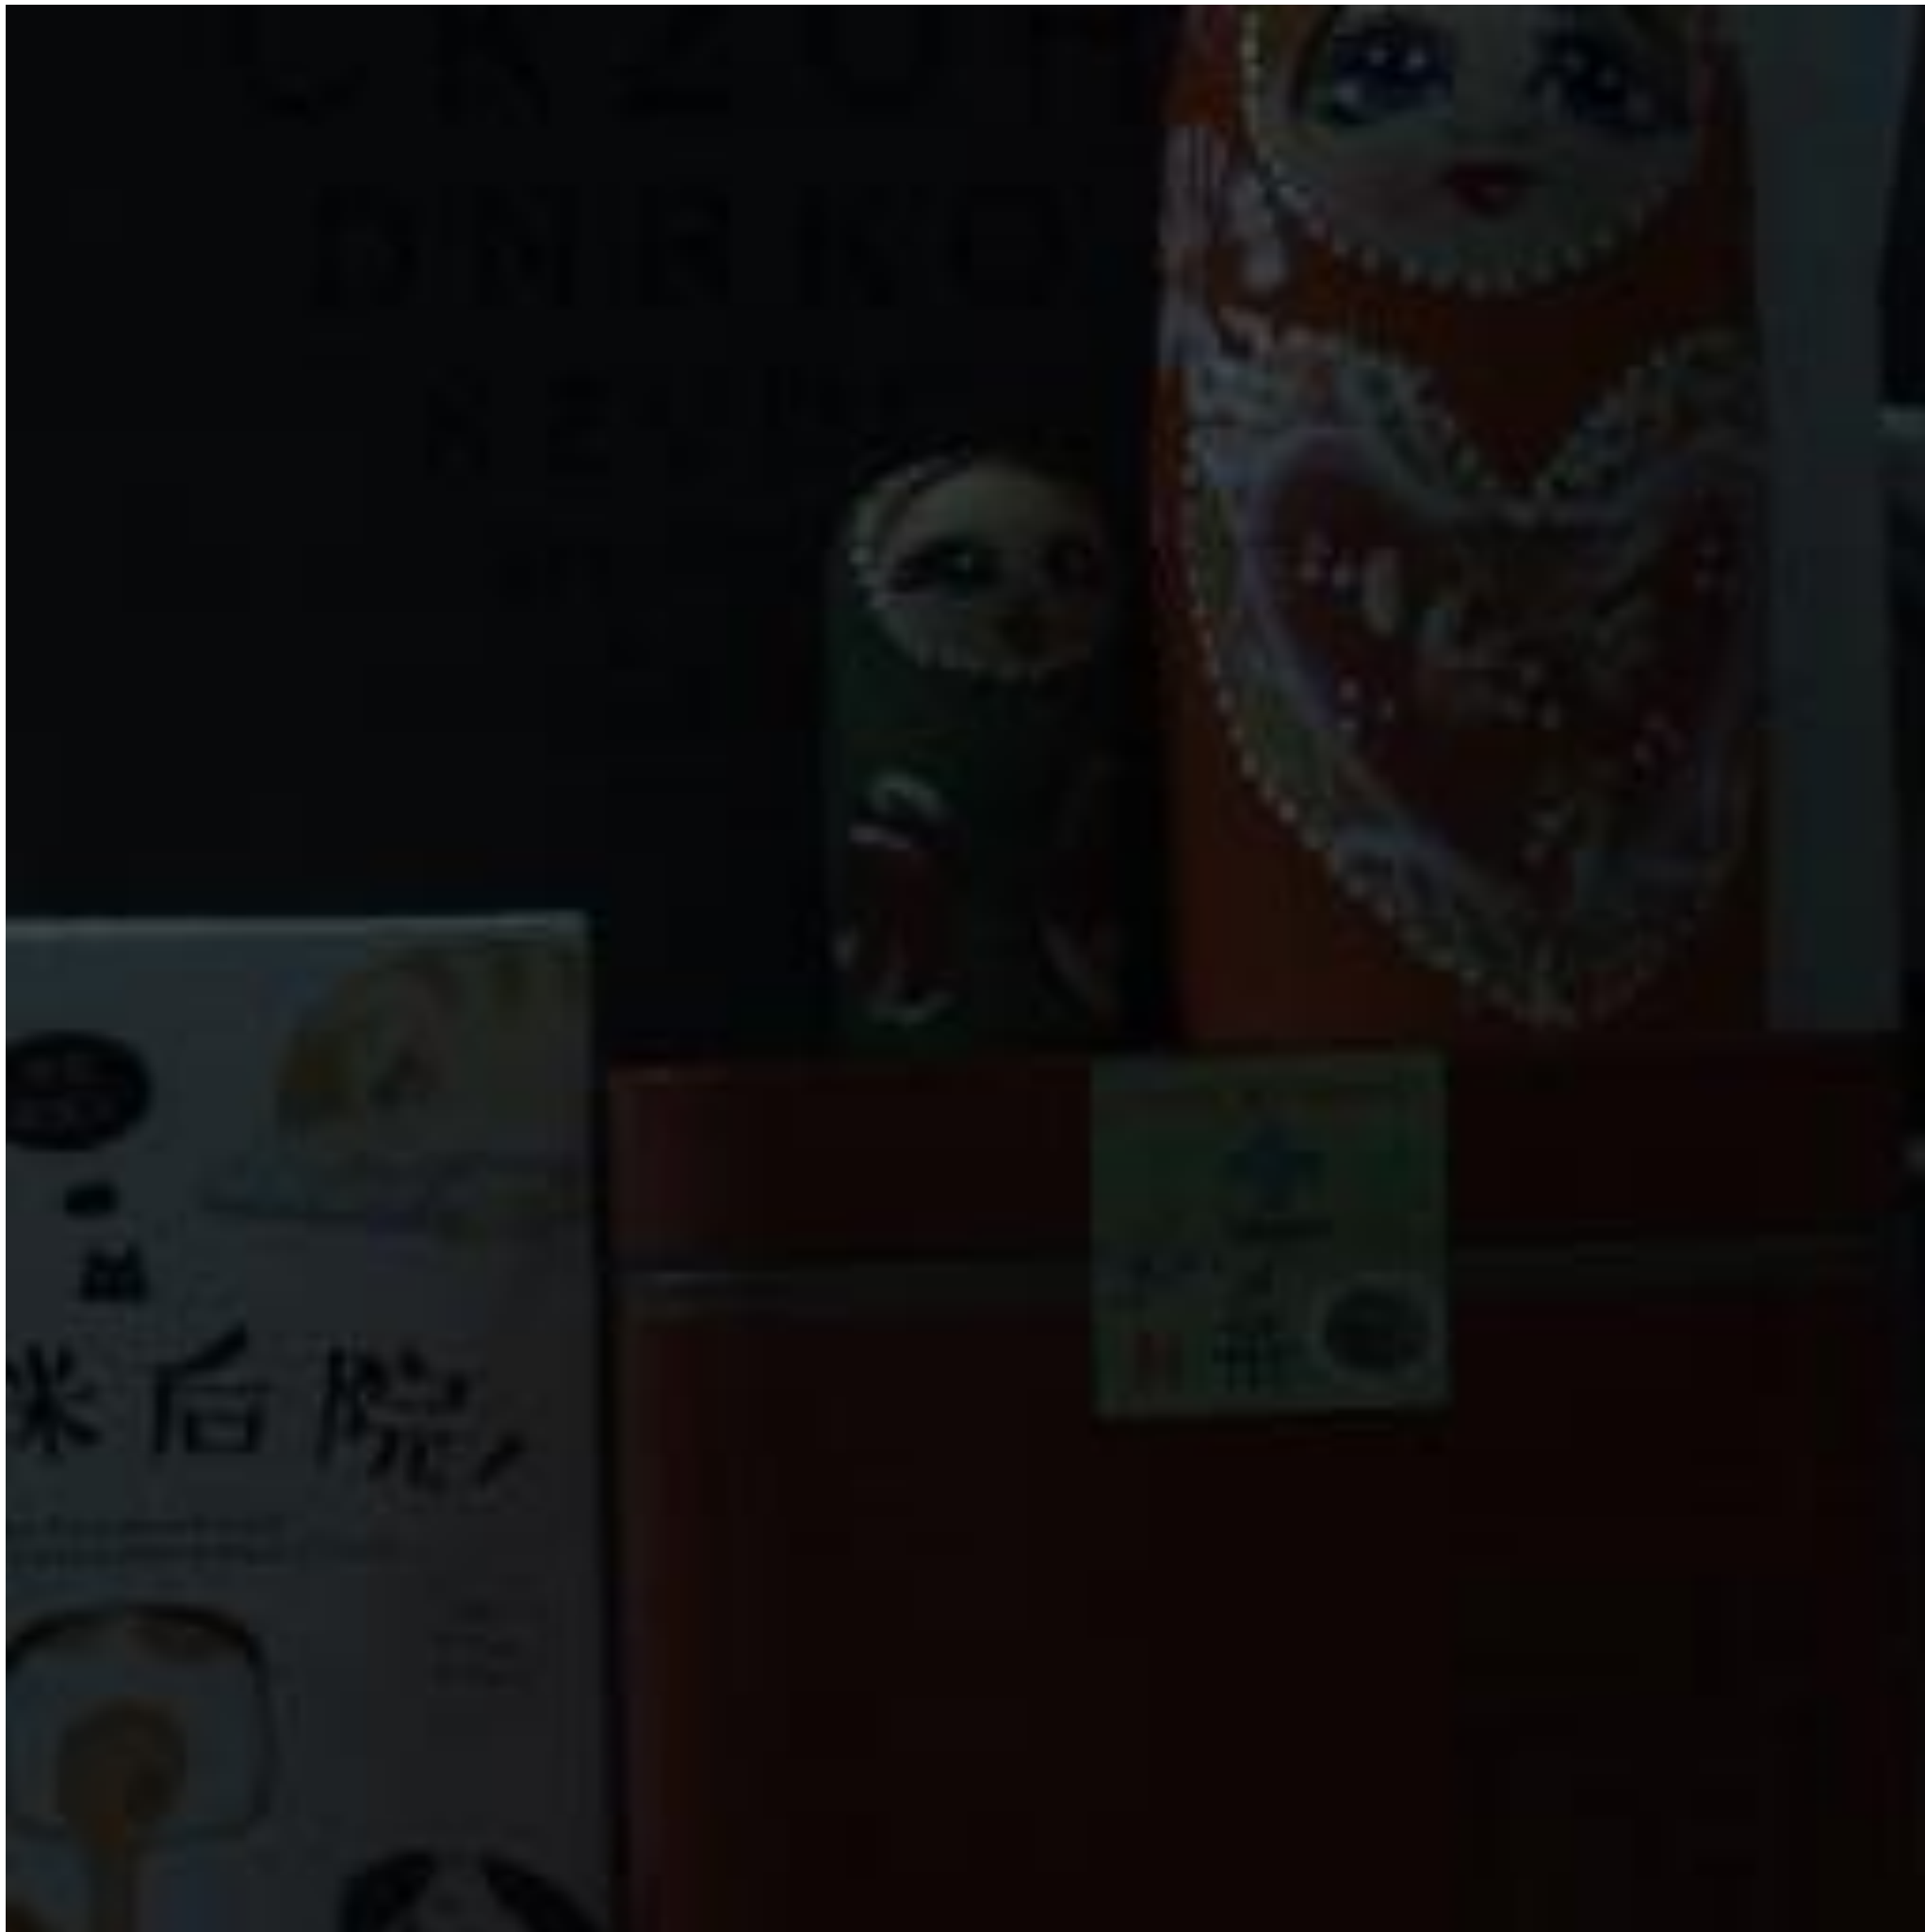

(b)

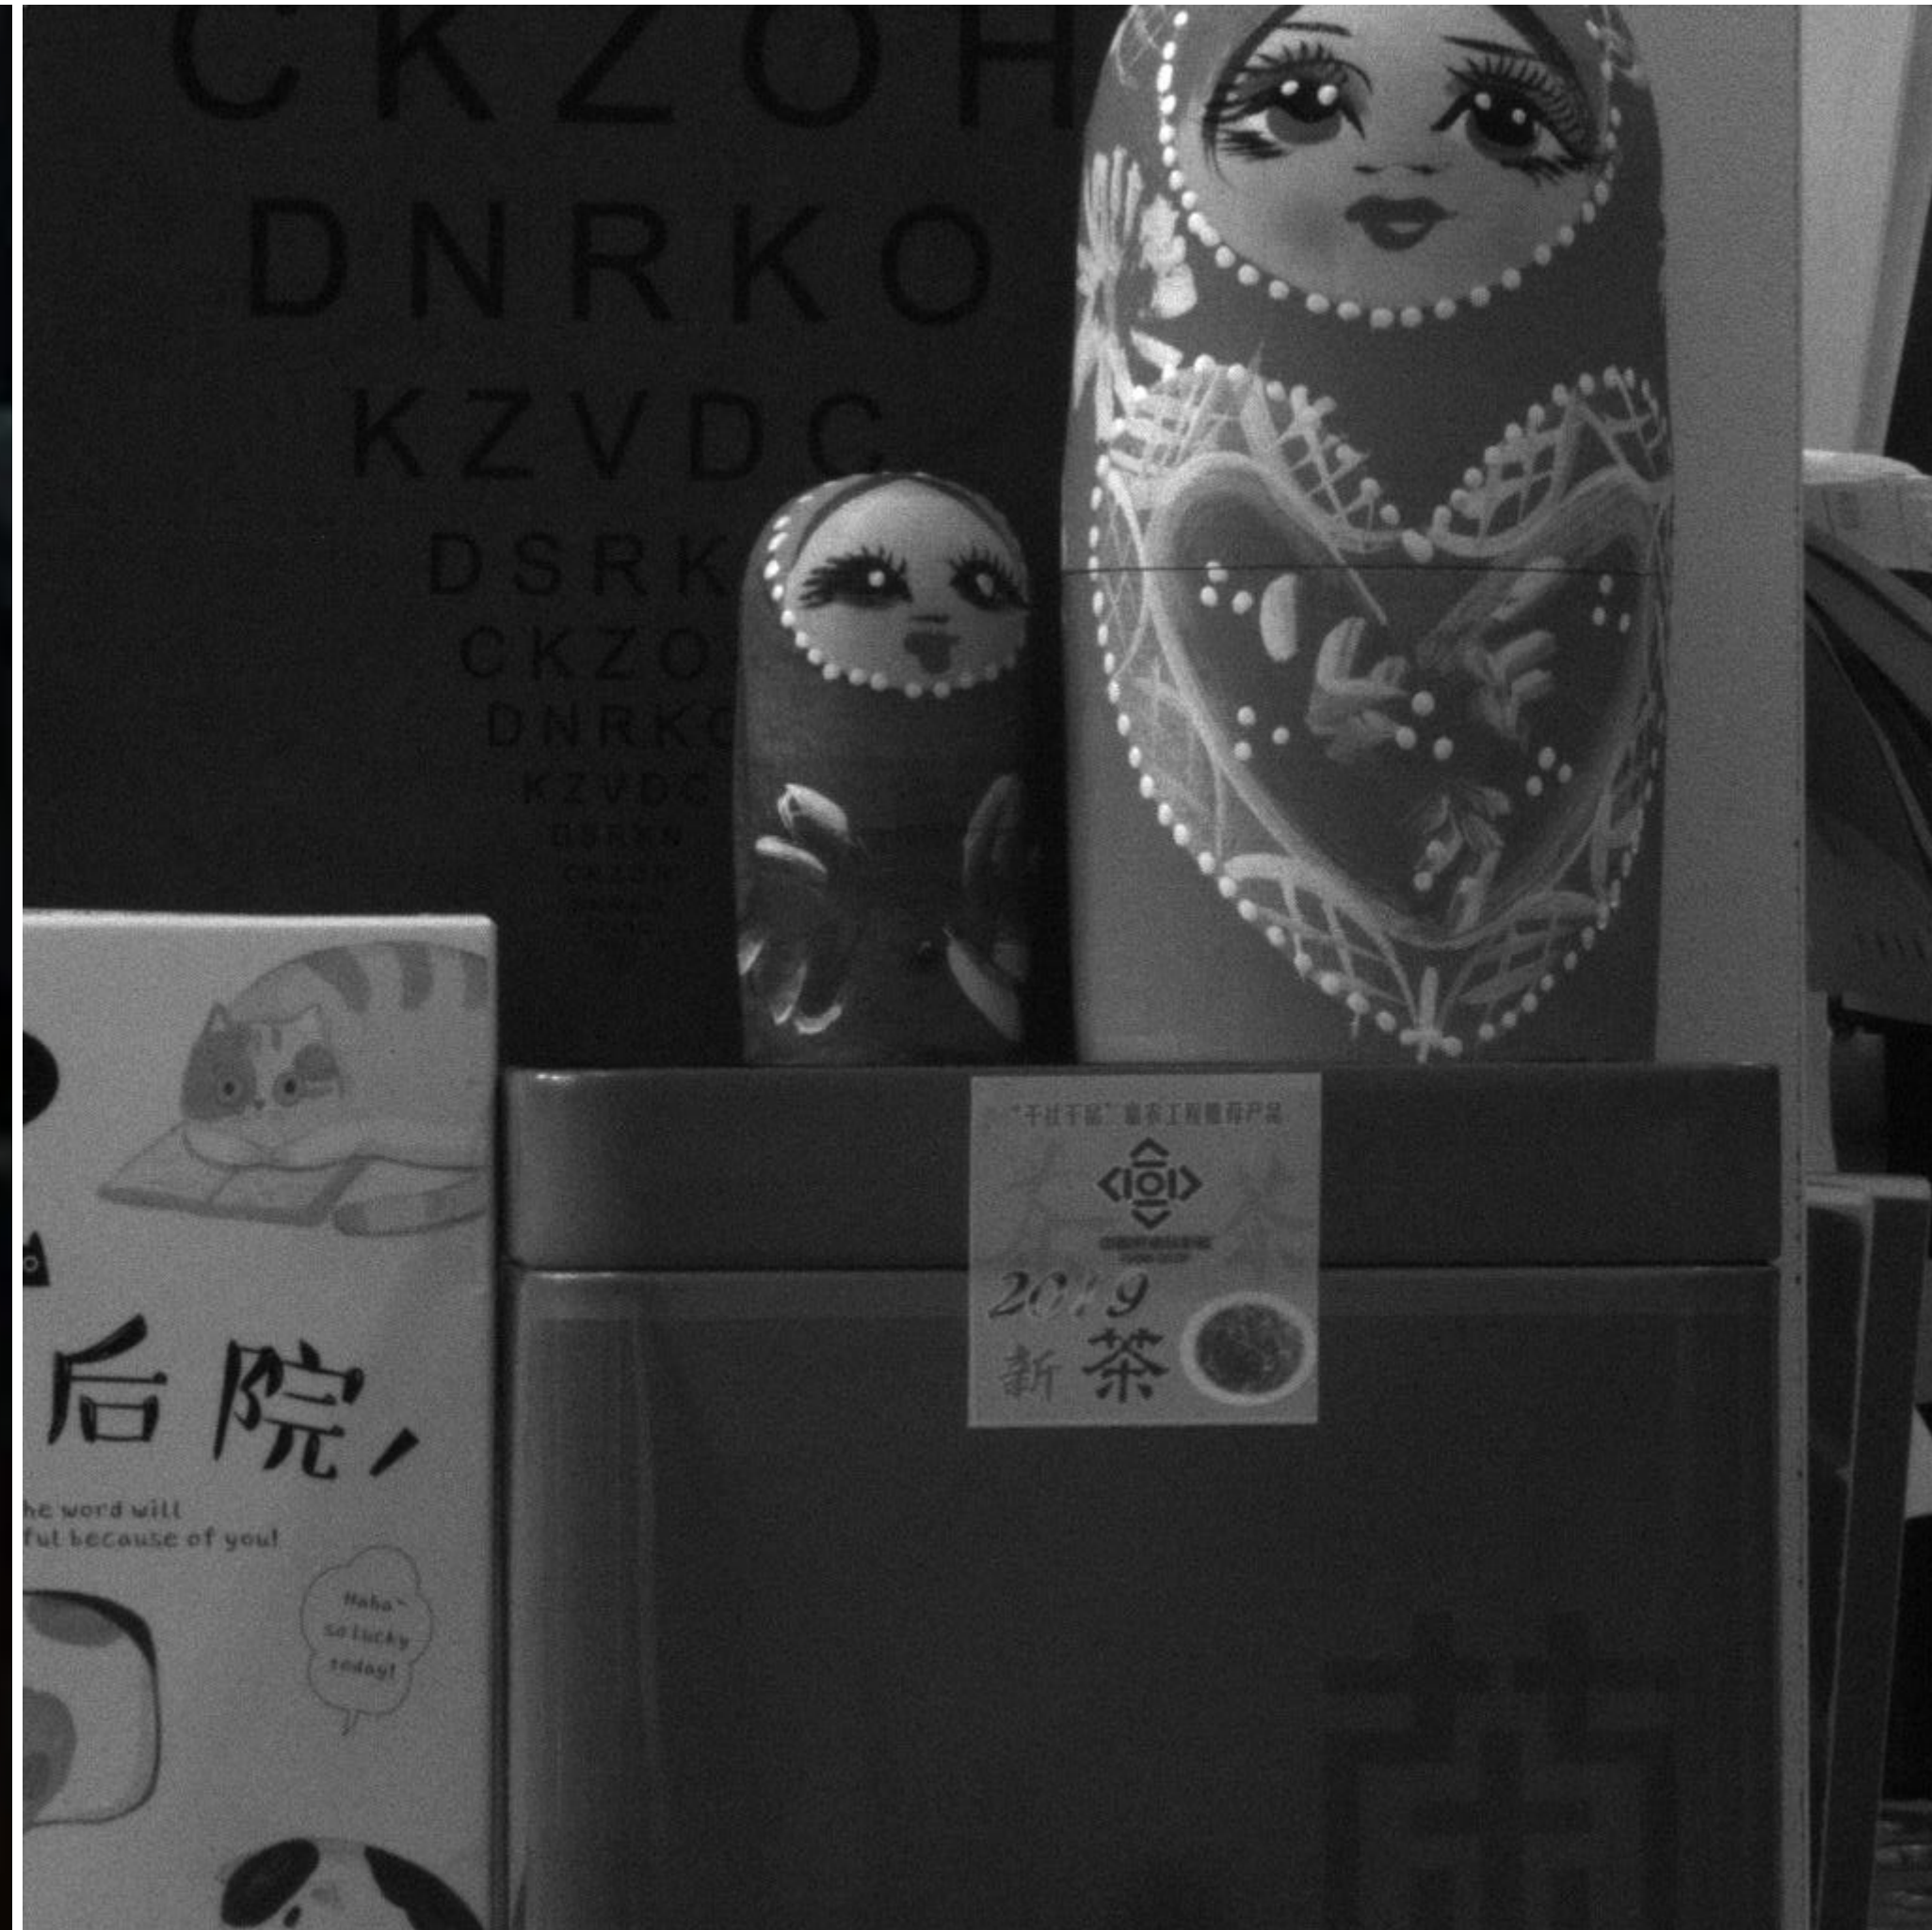

(c)

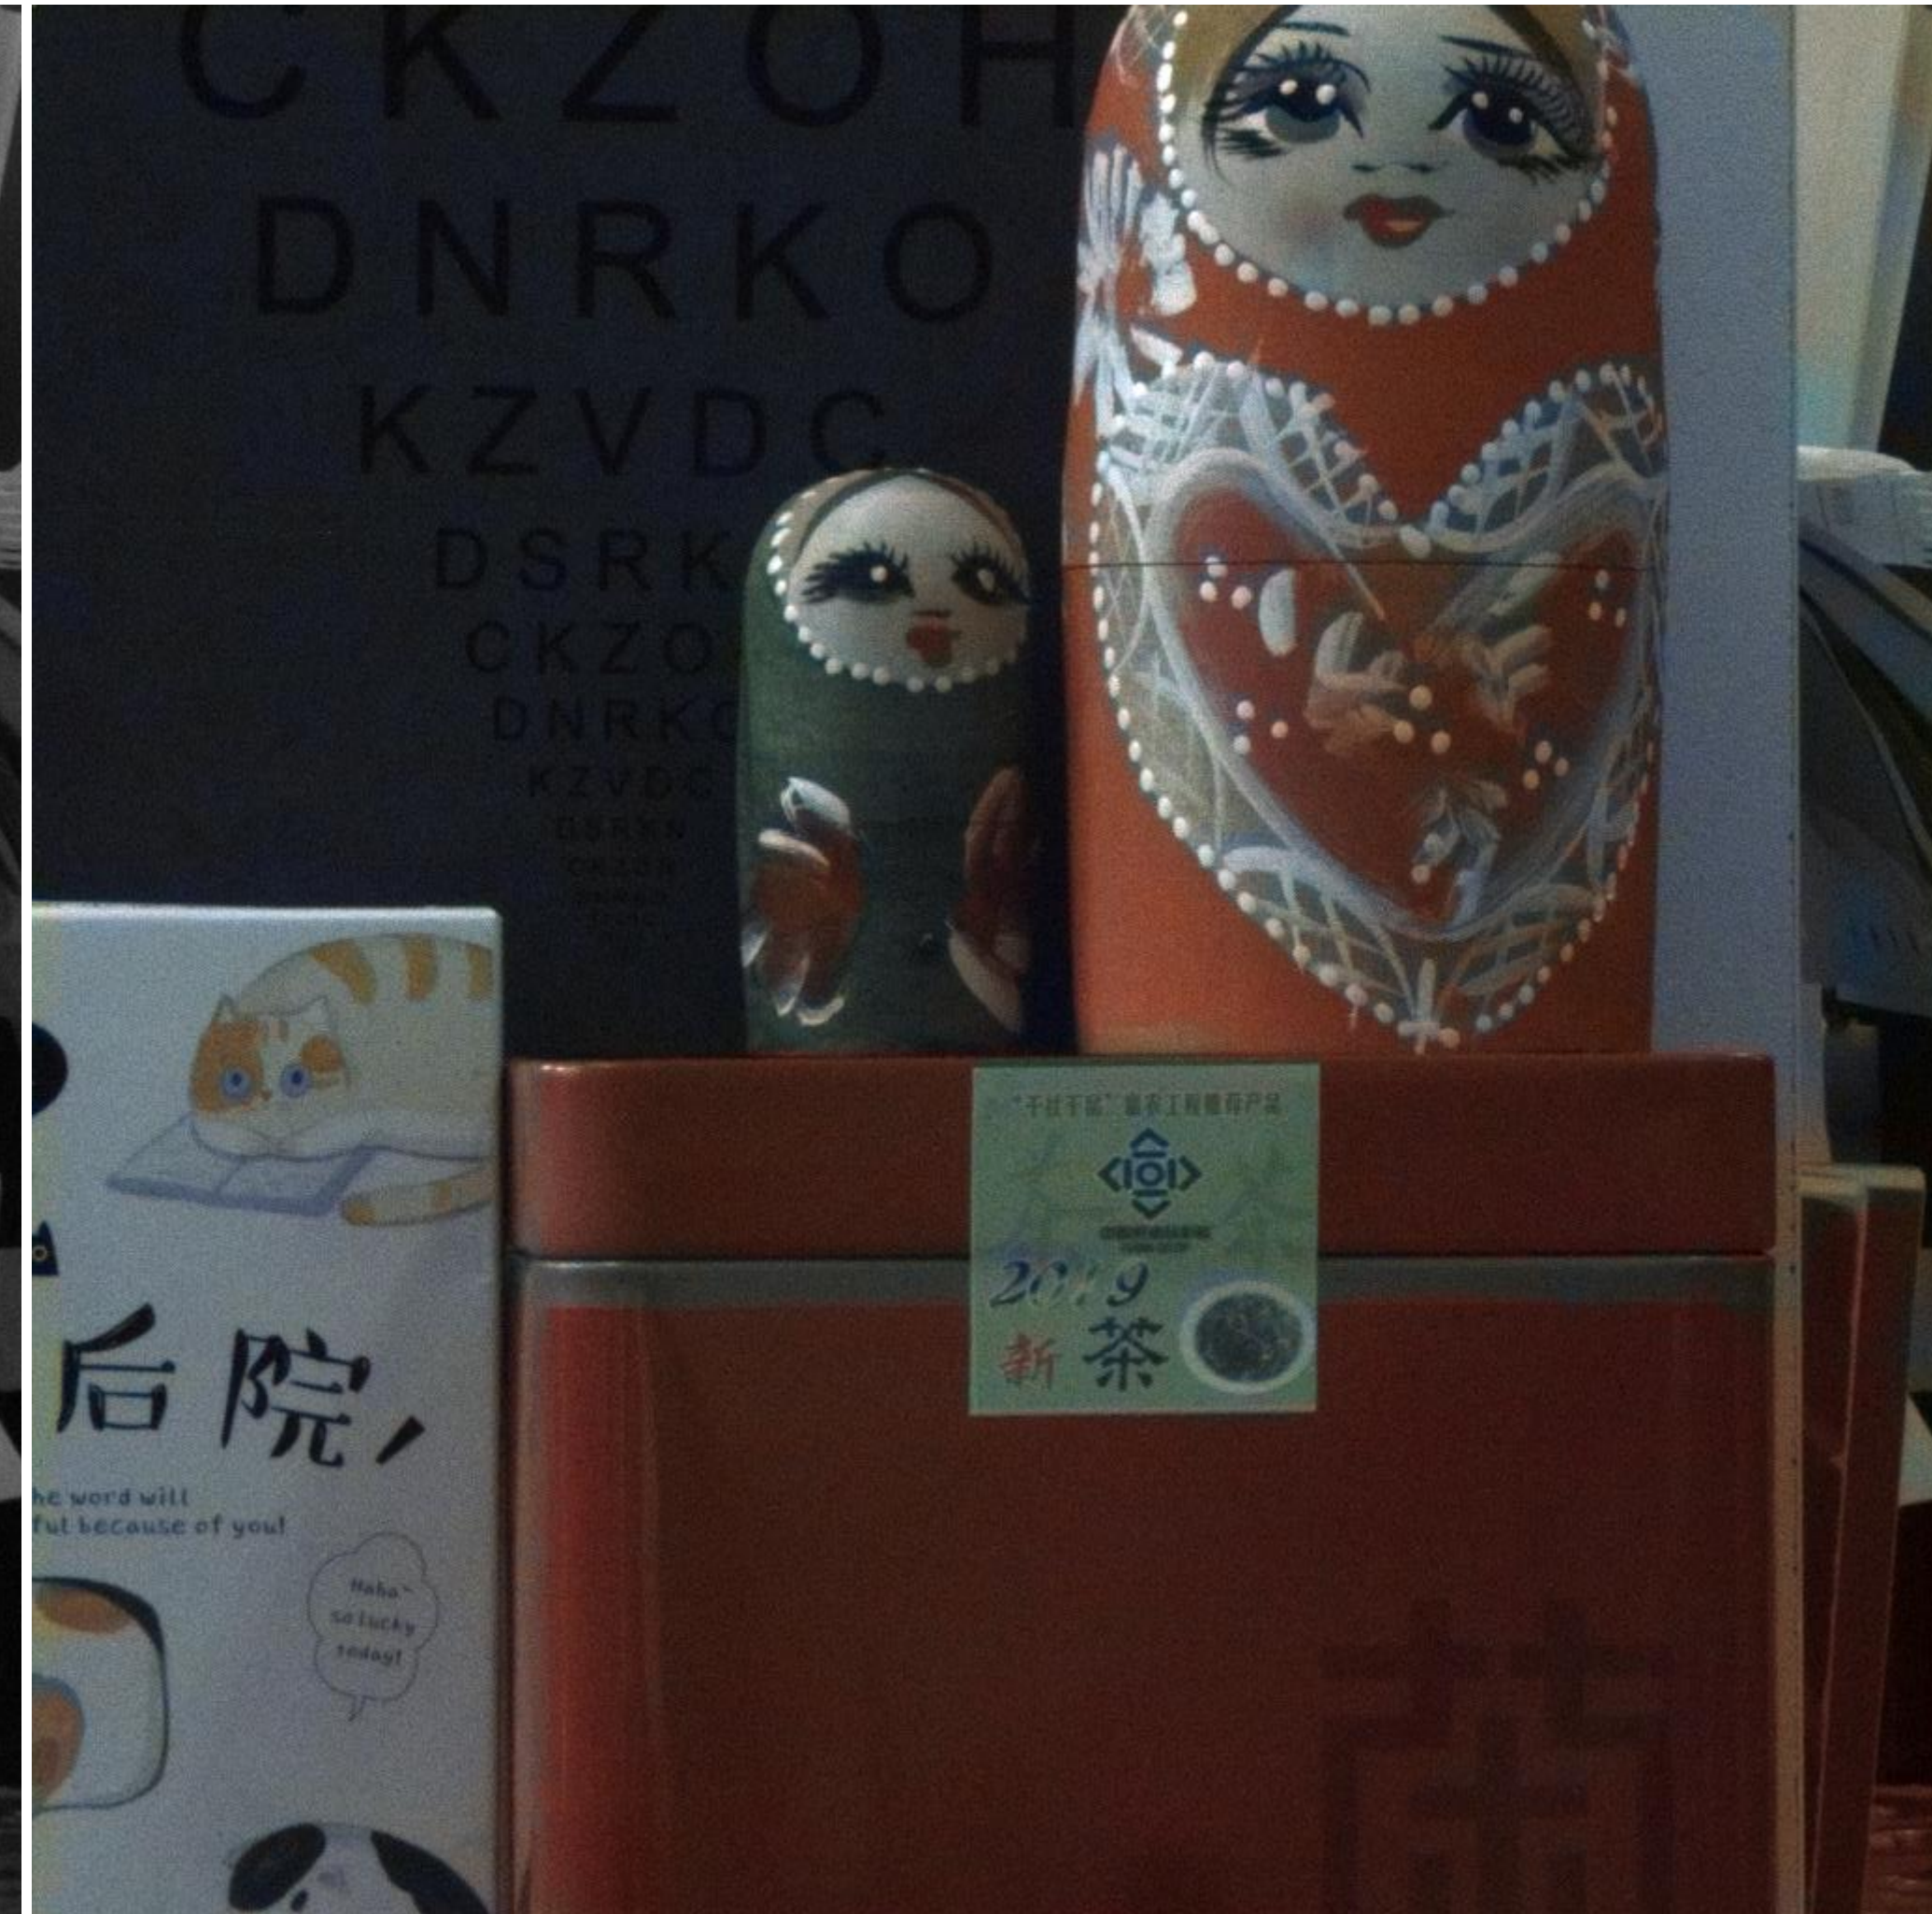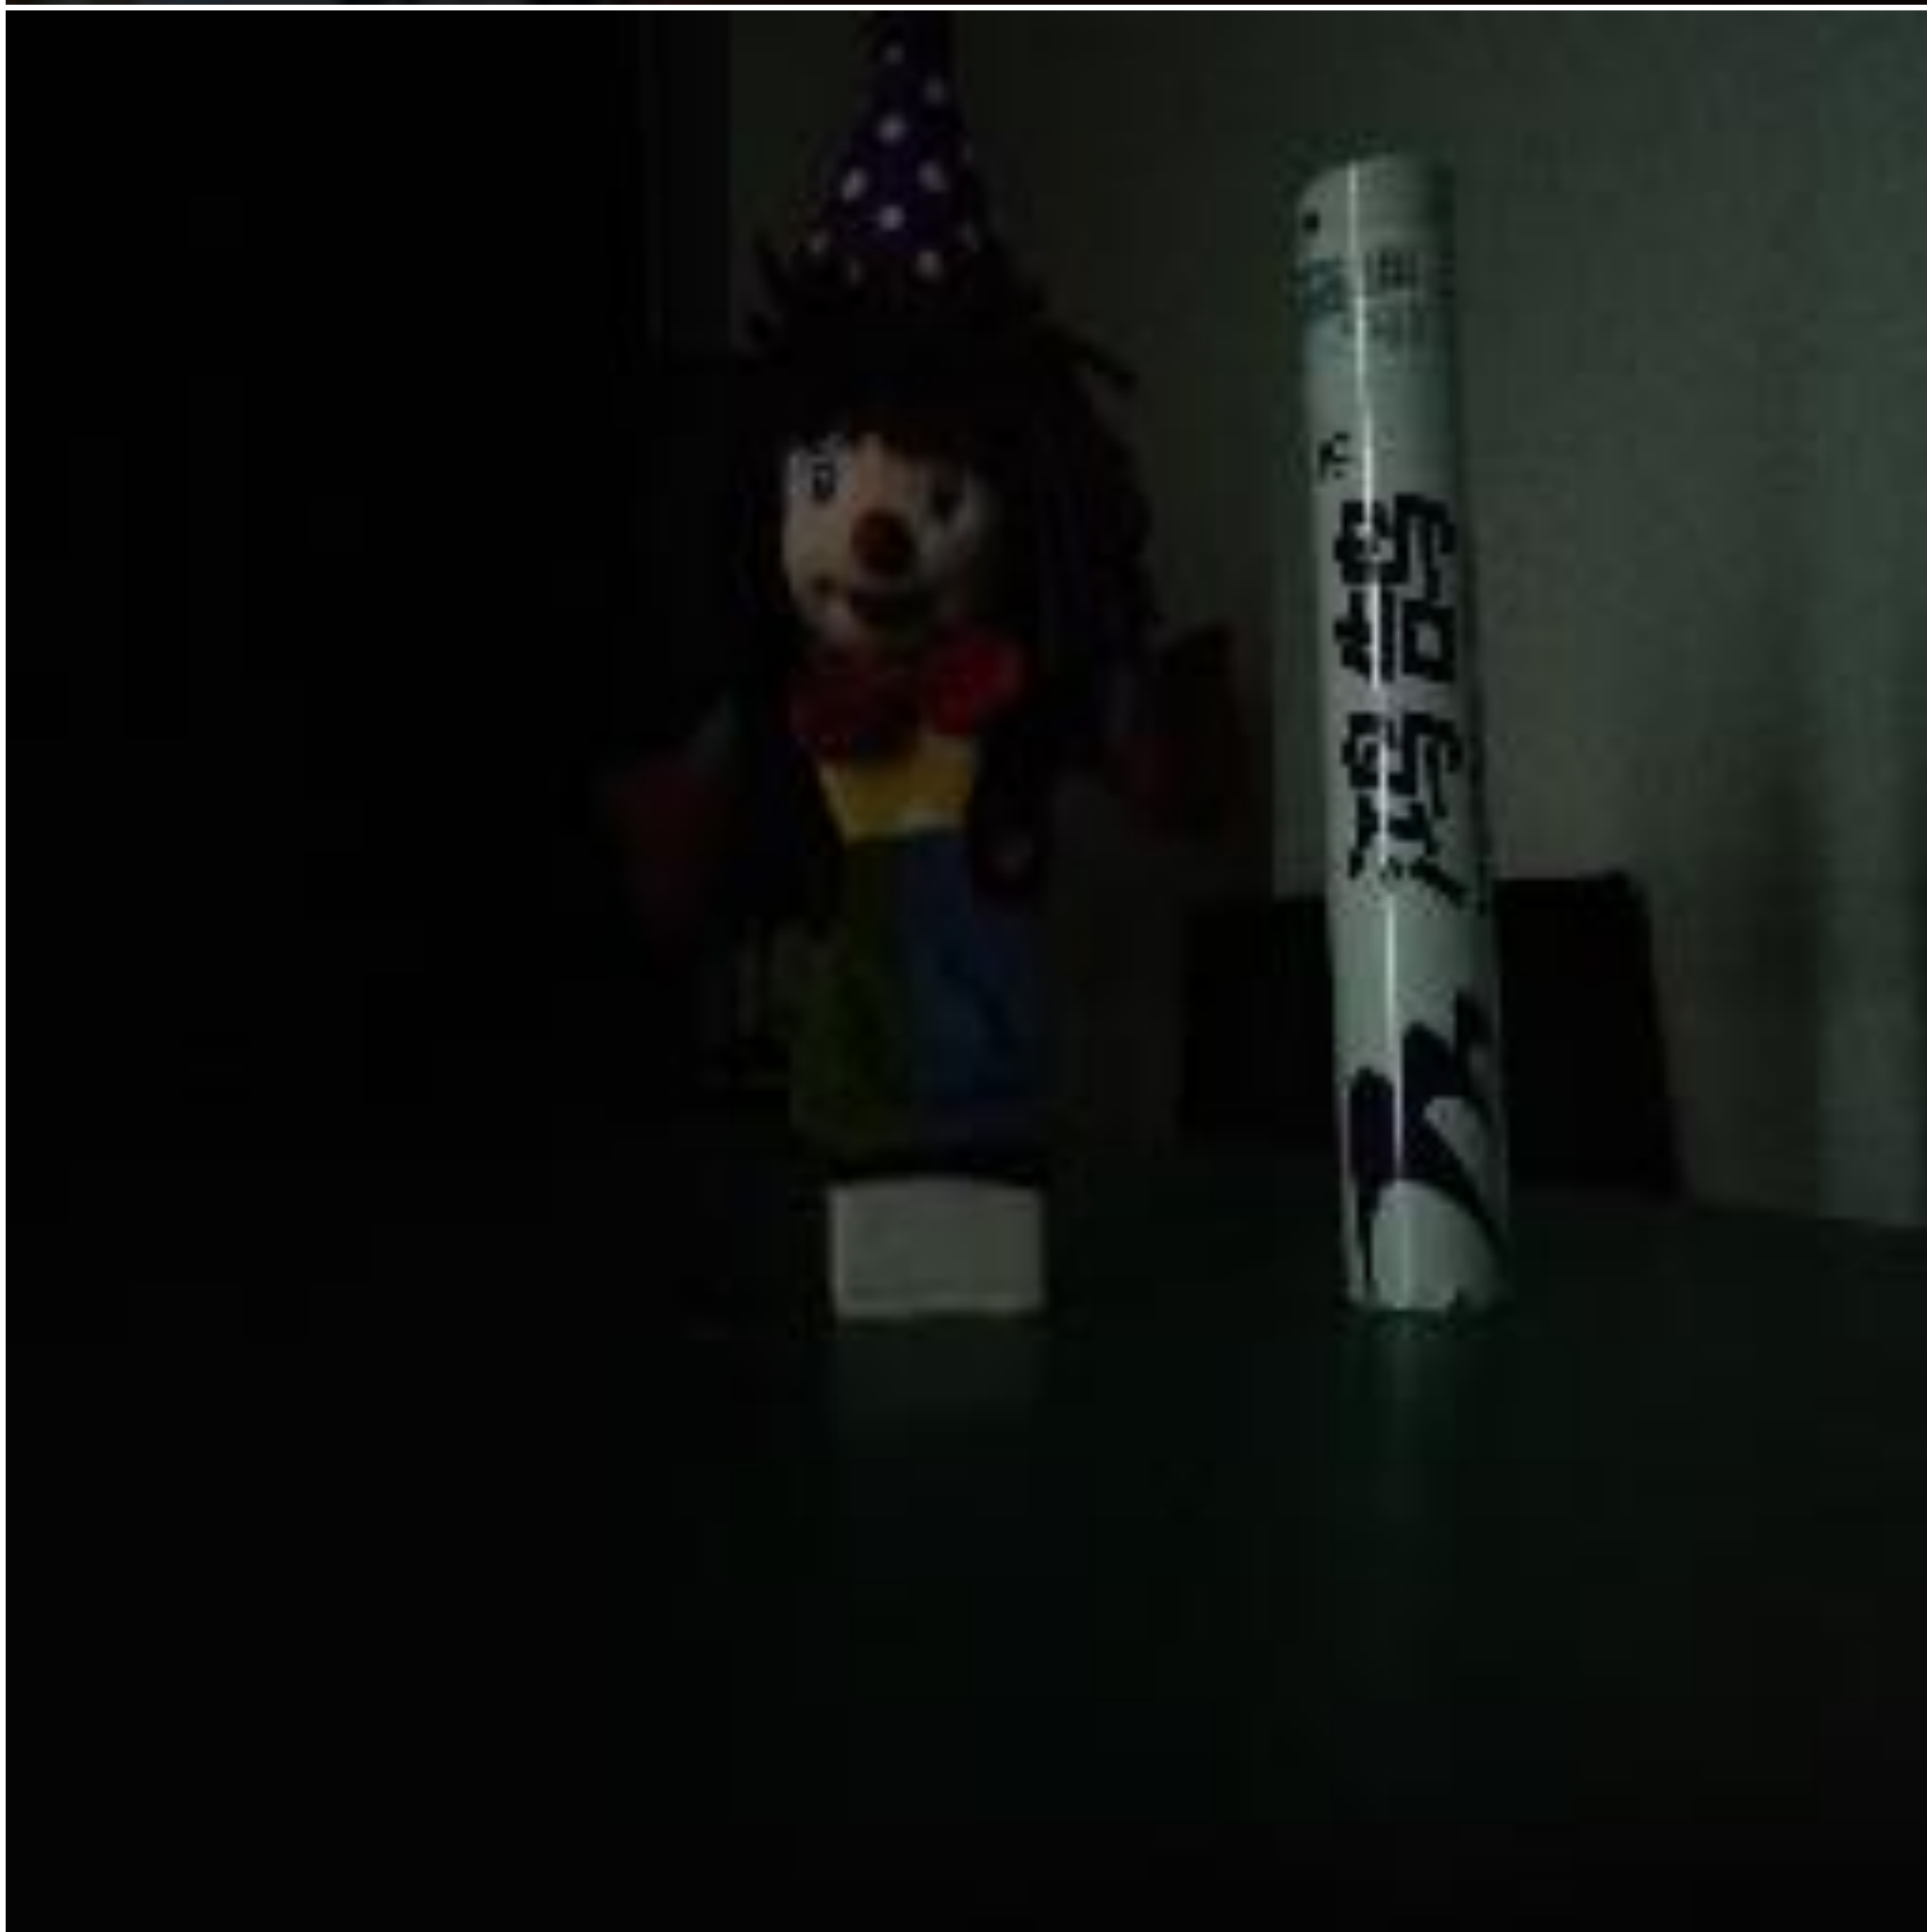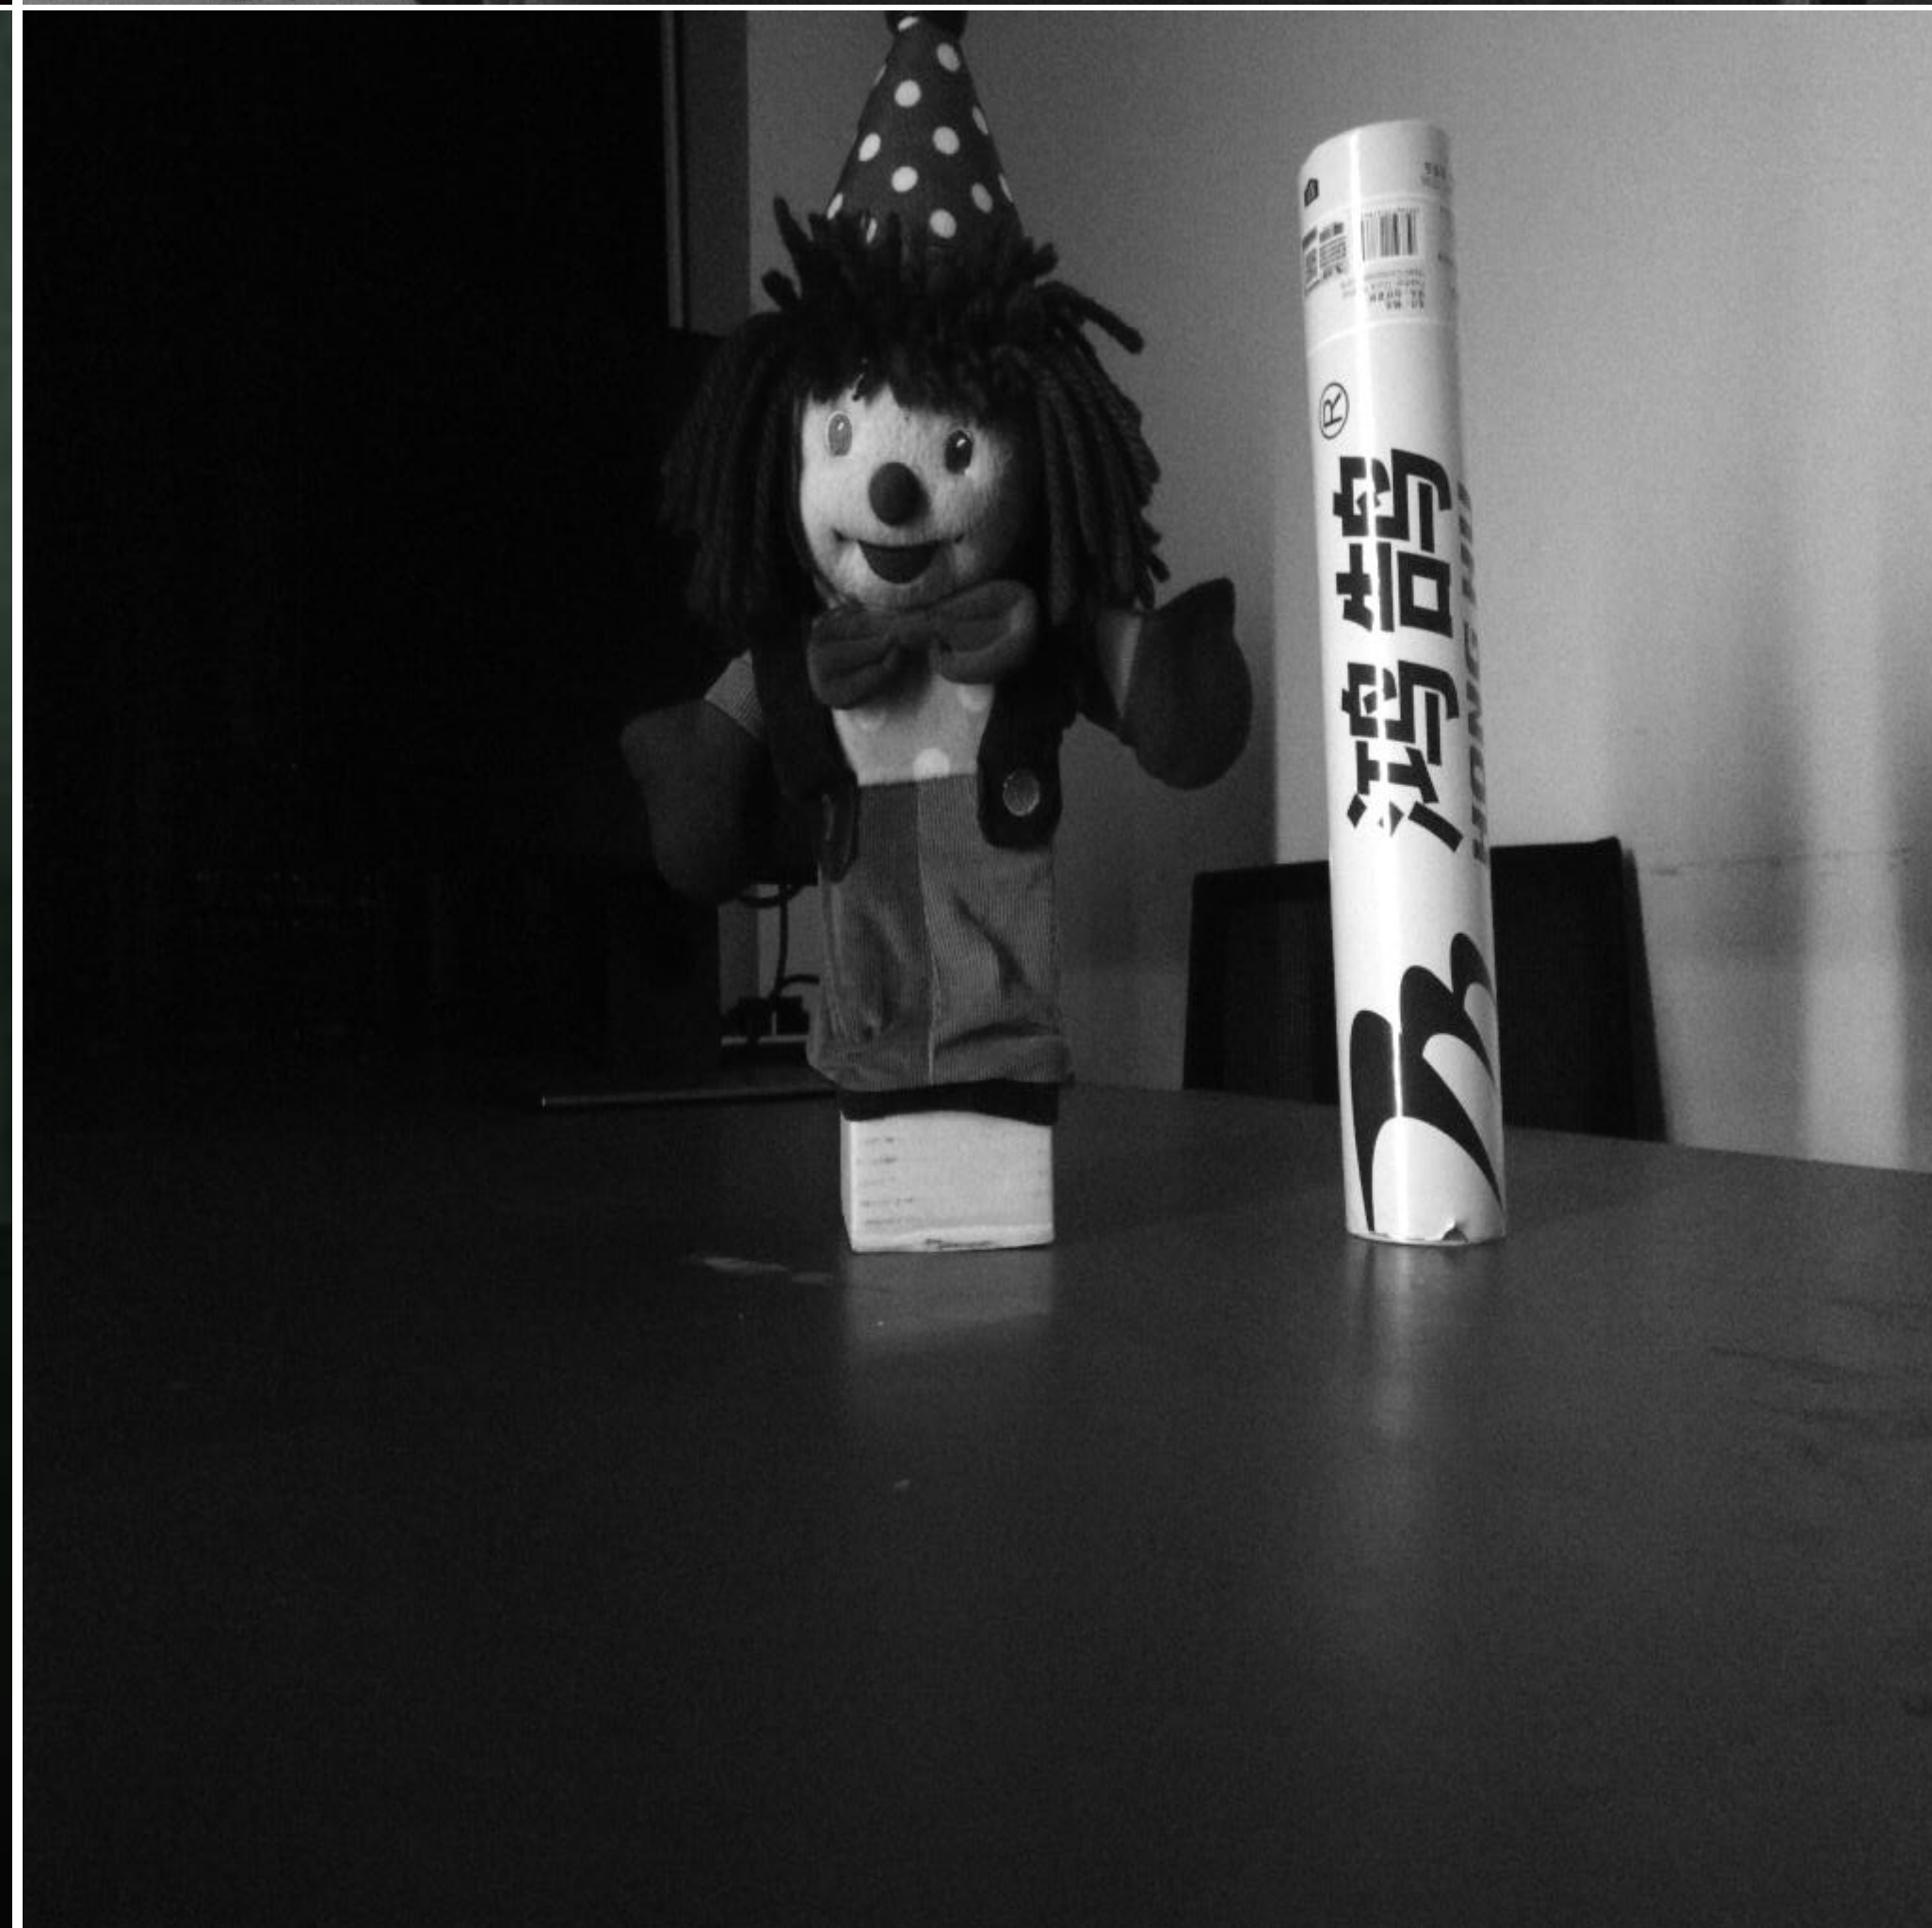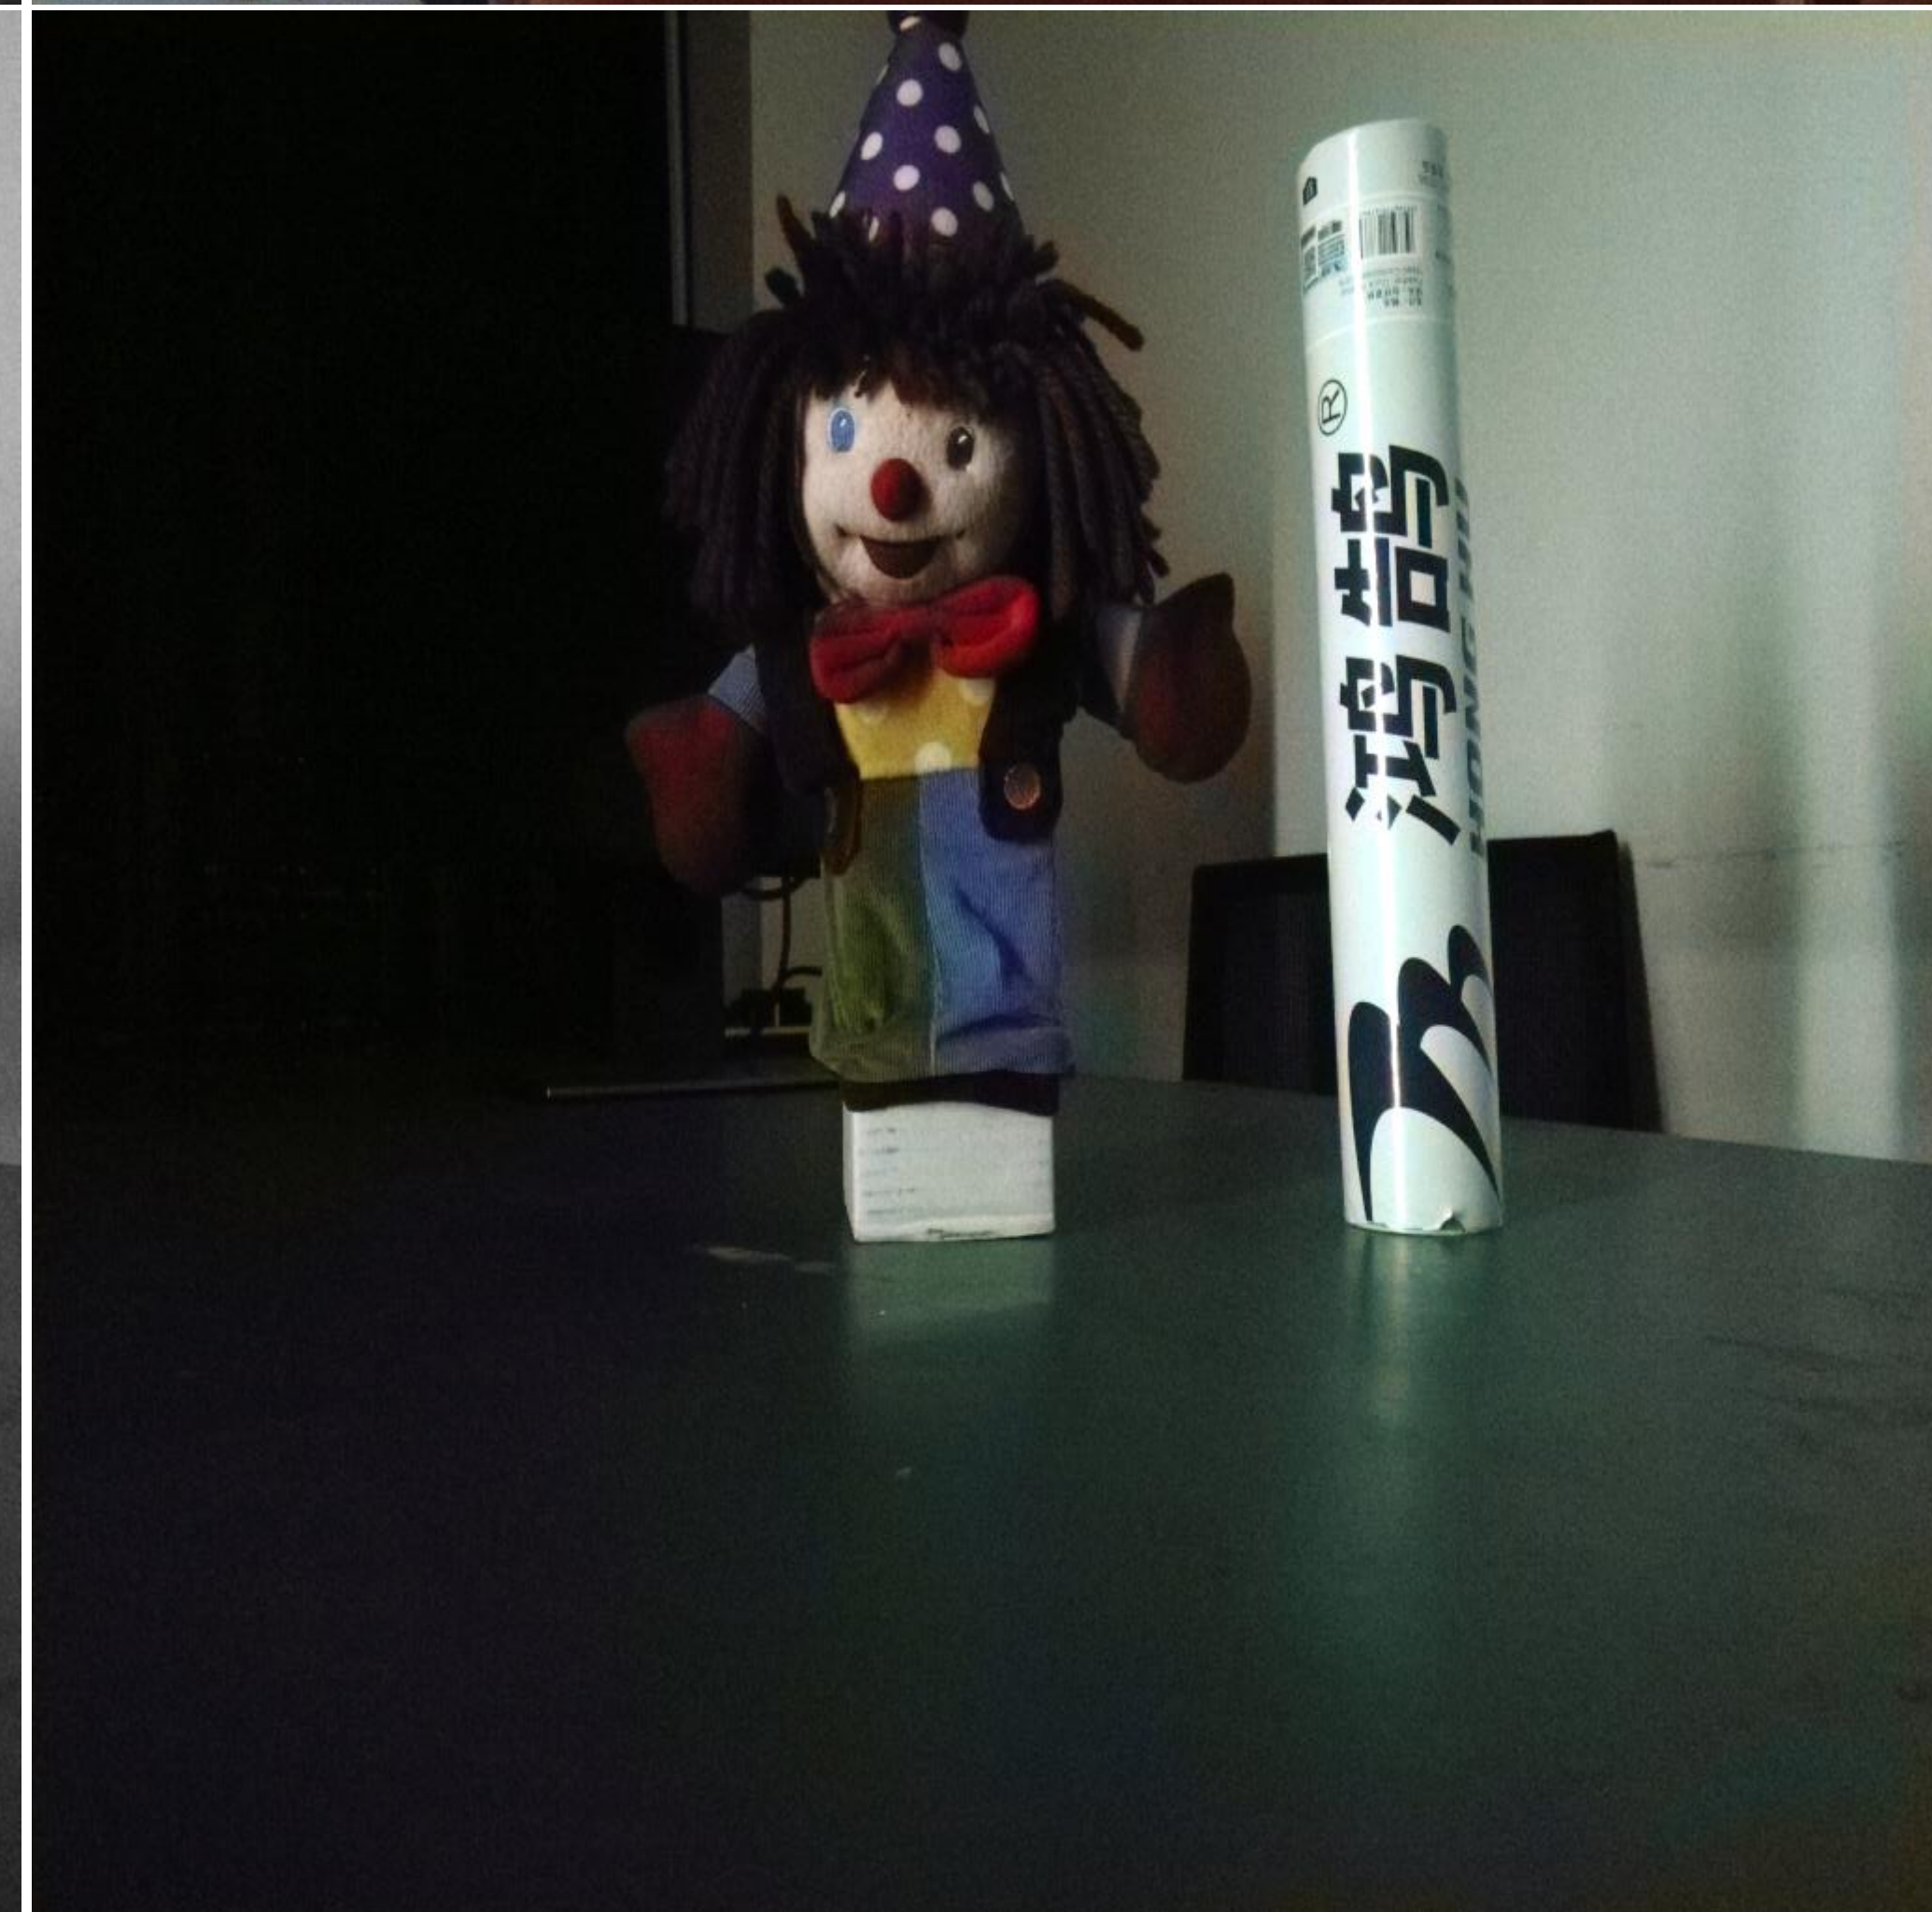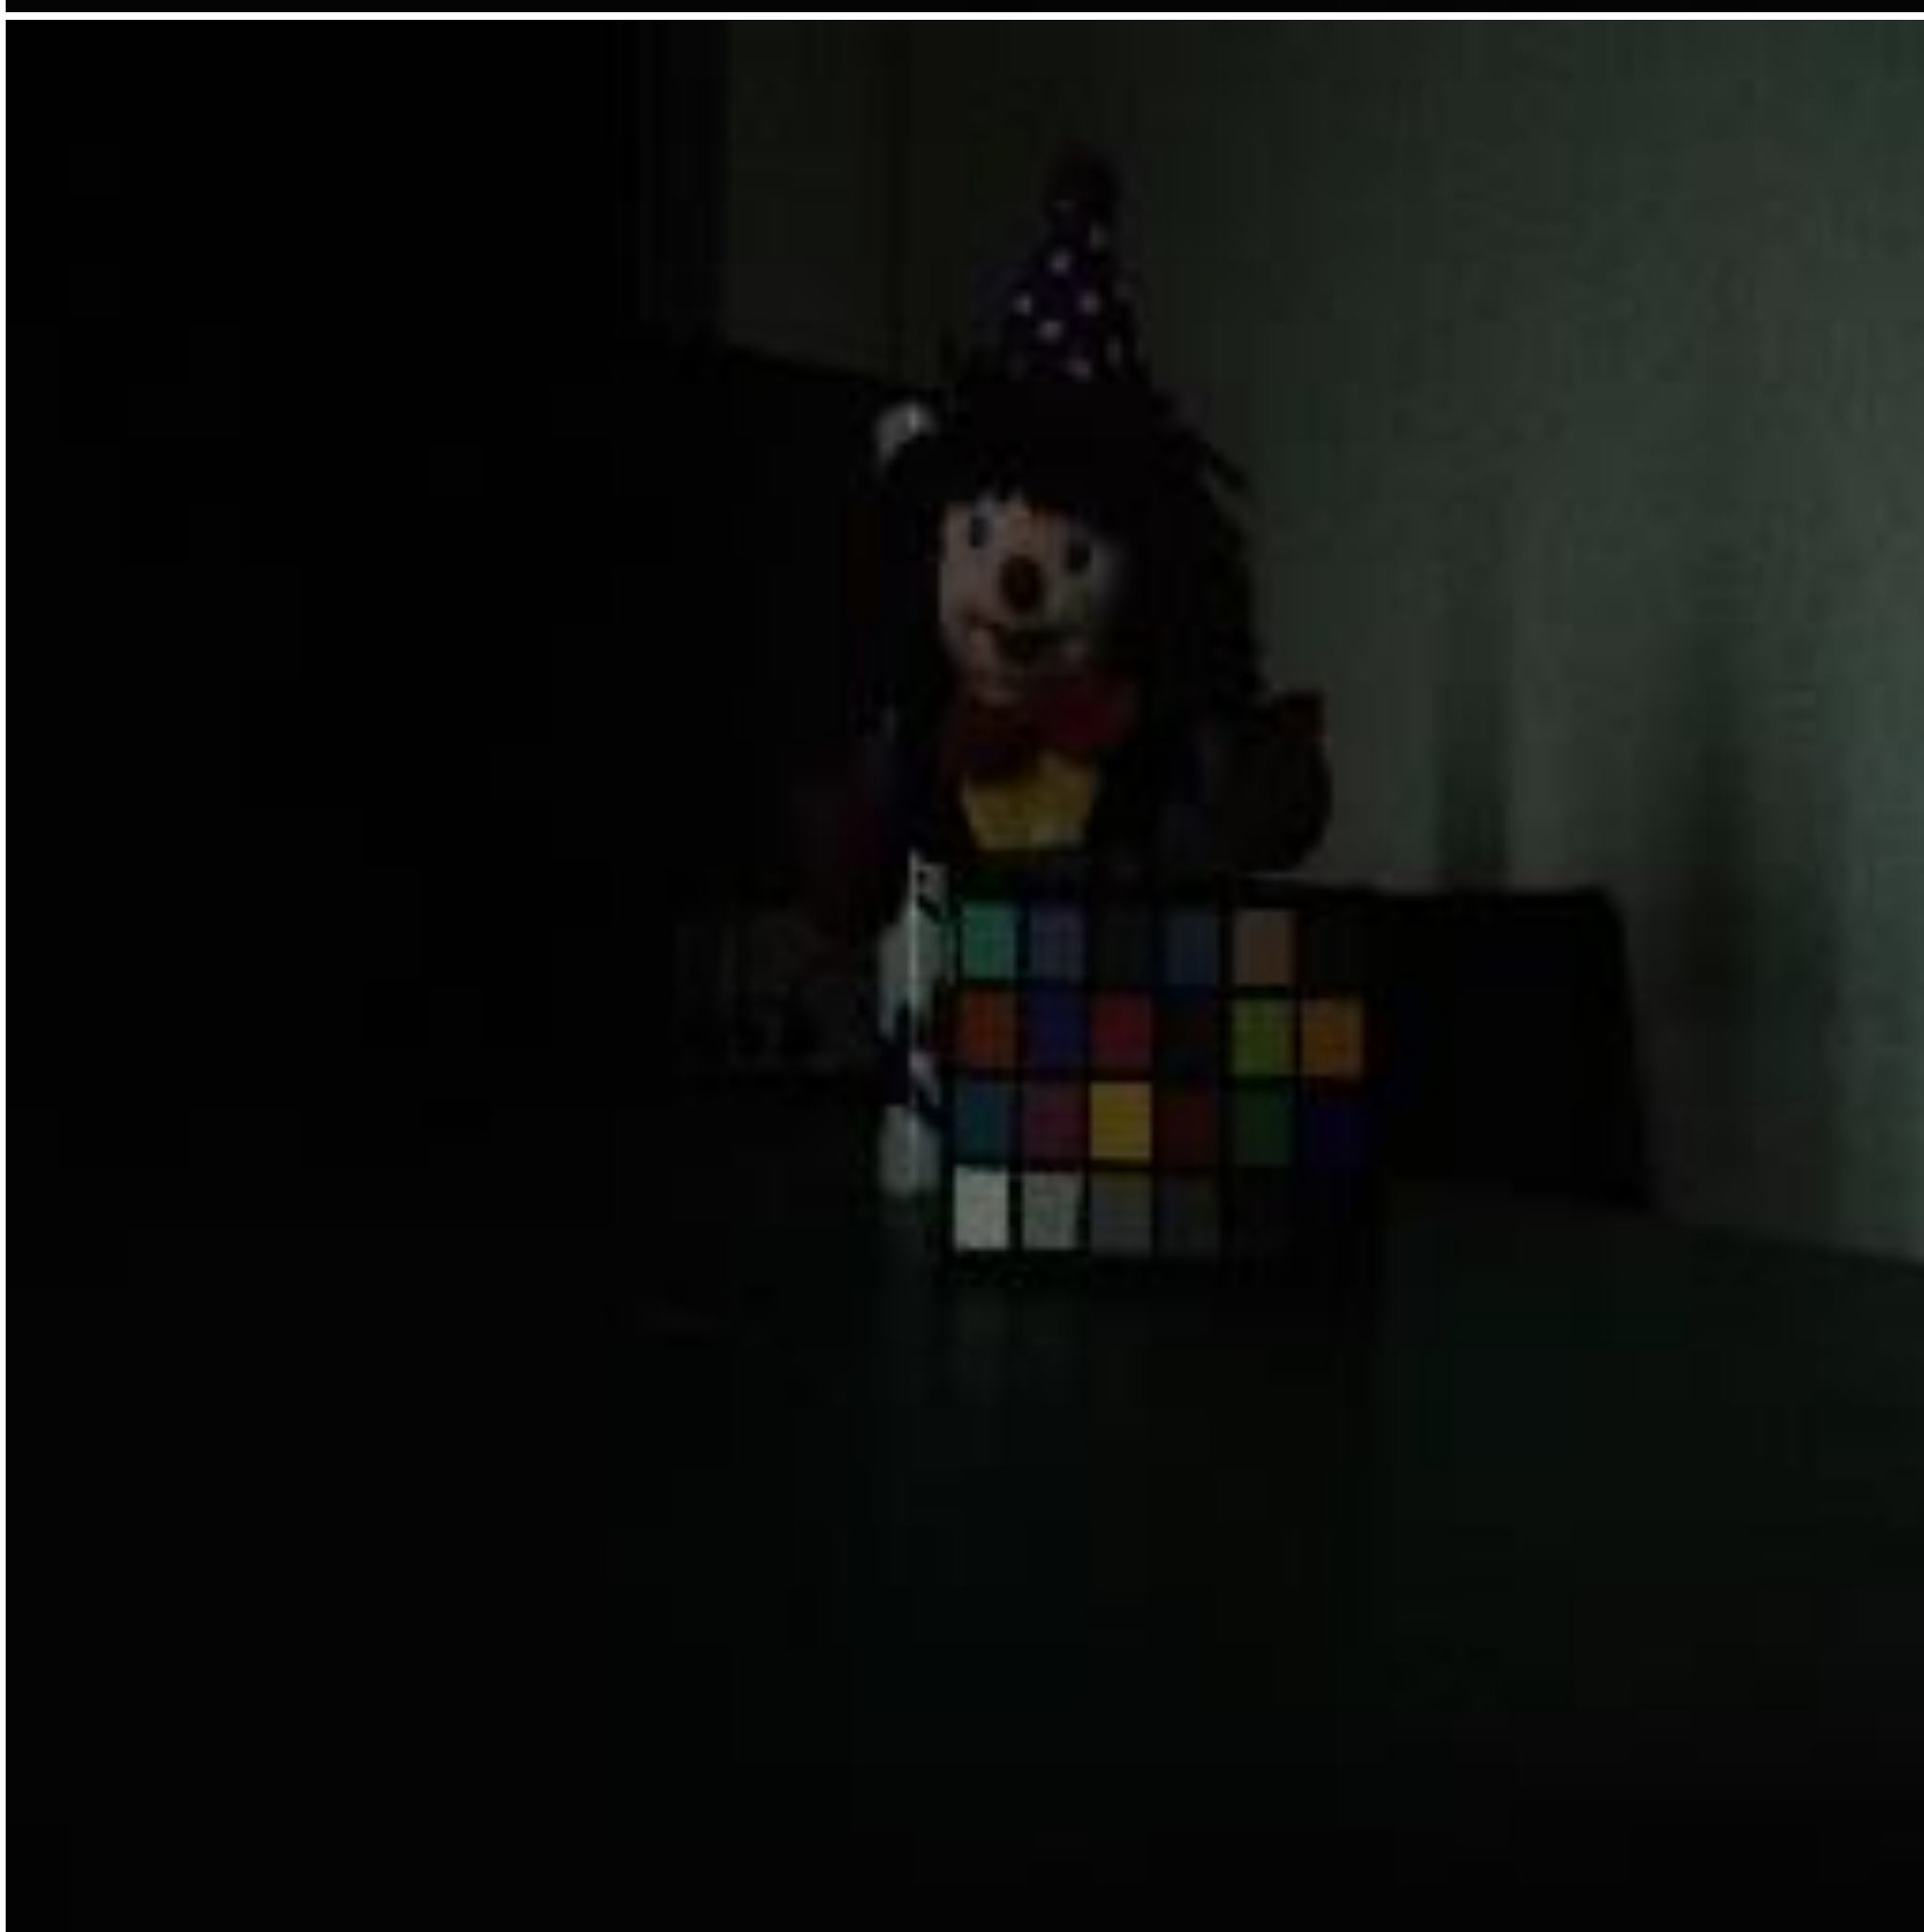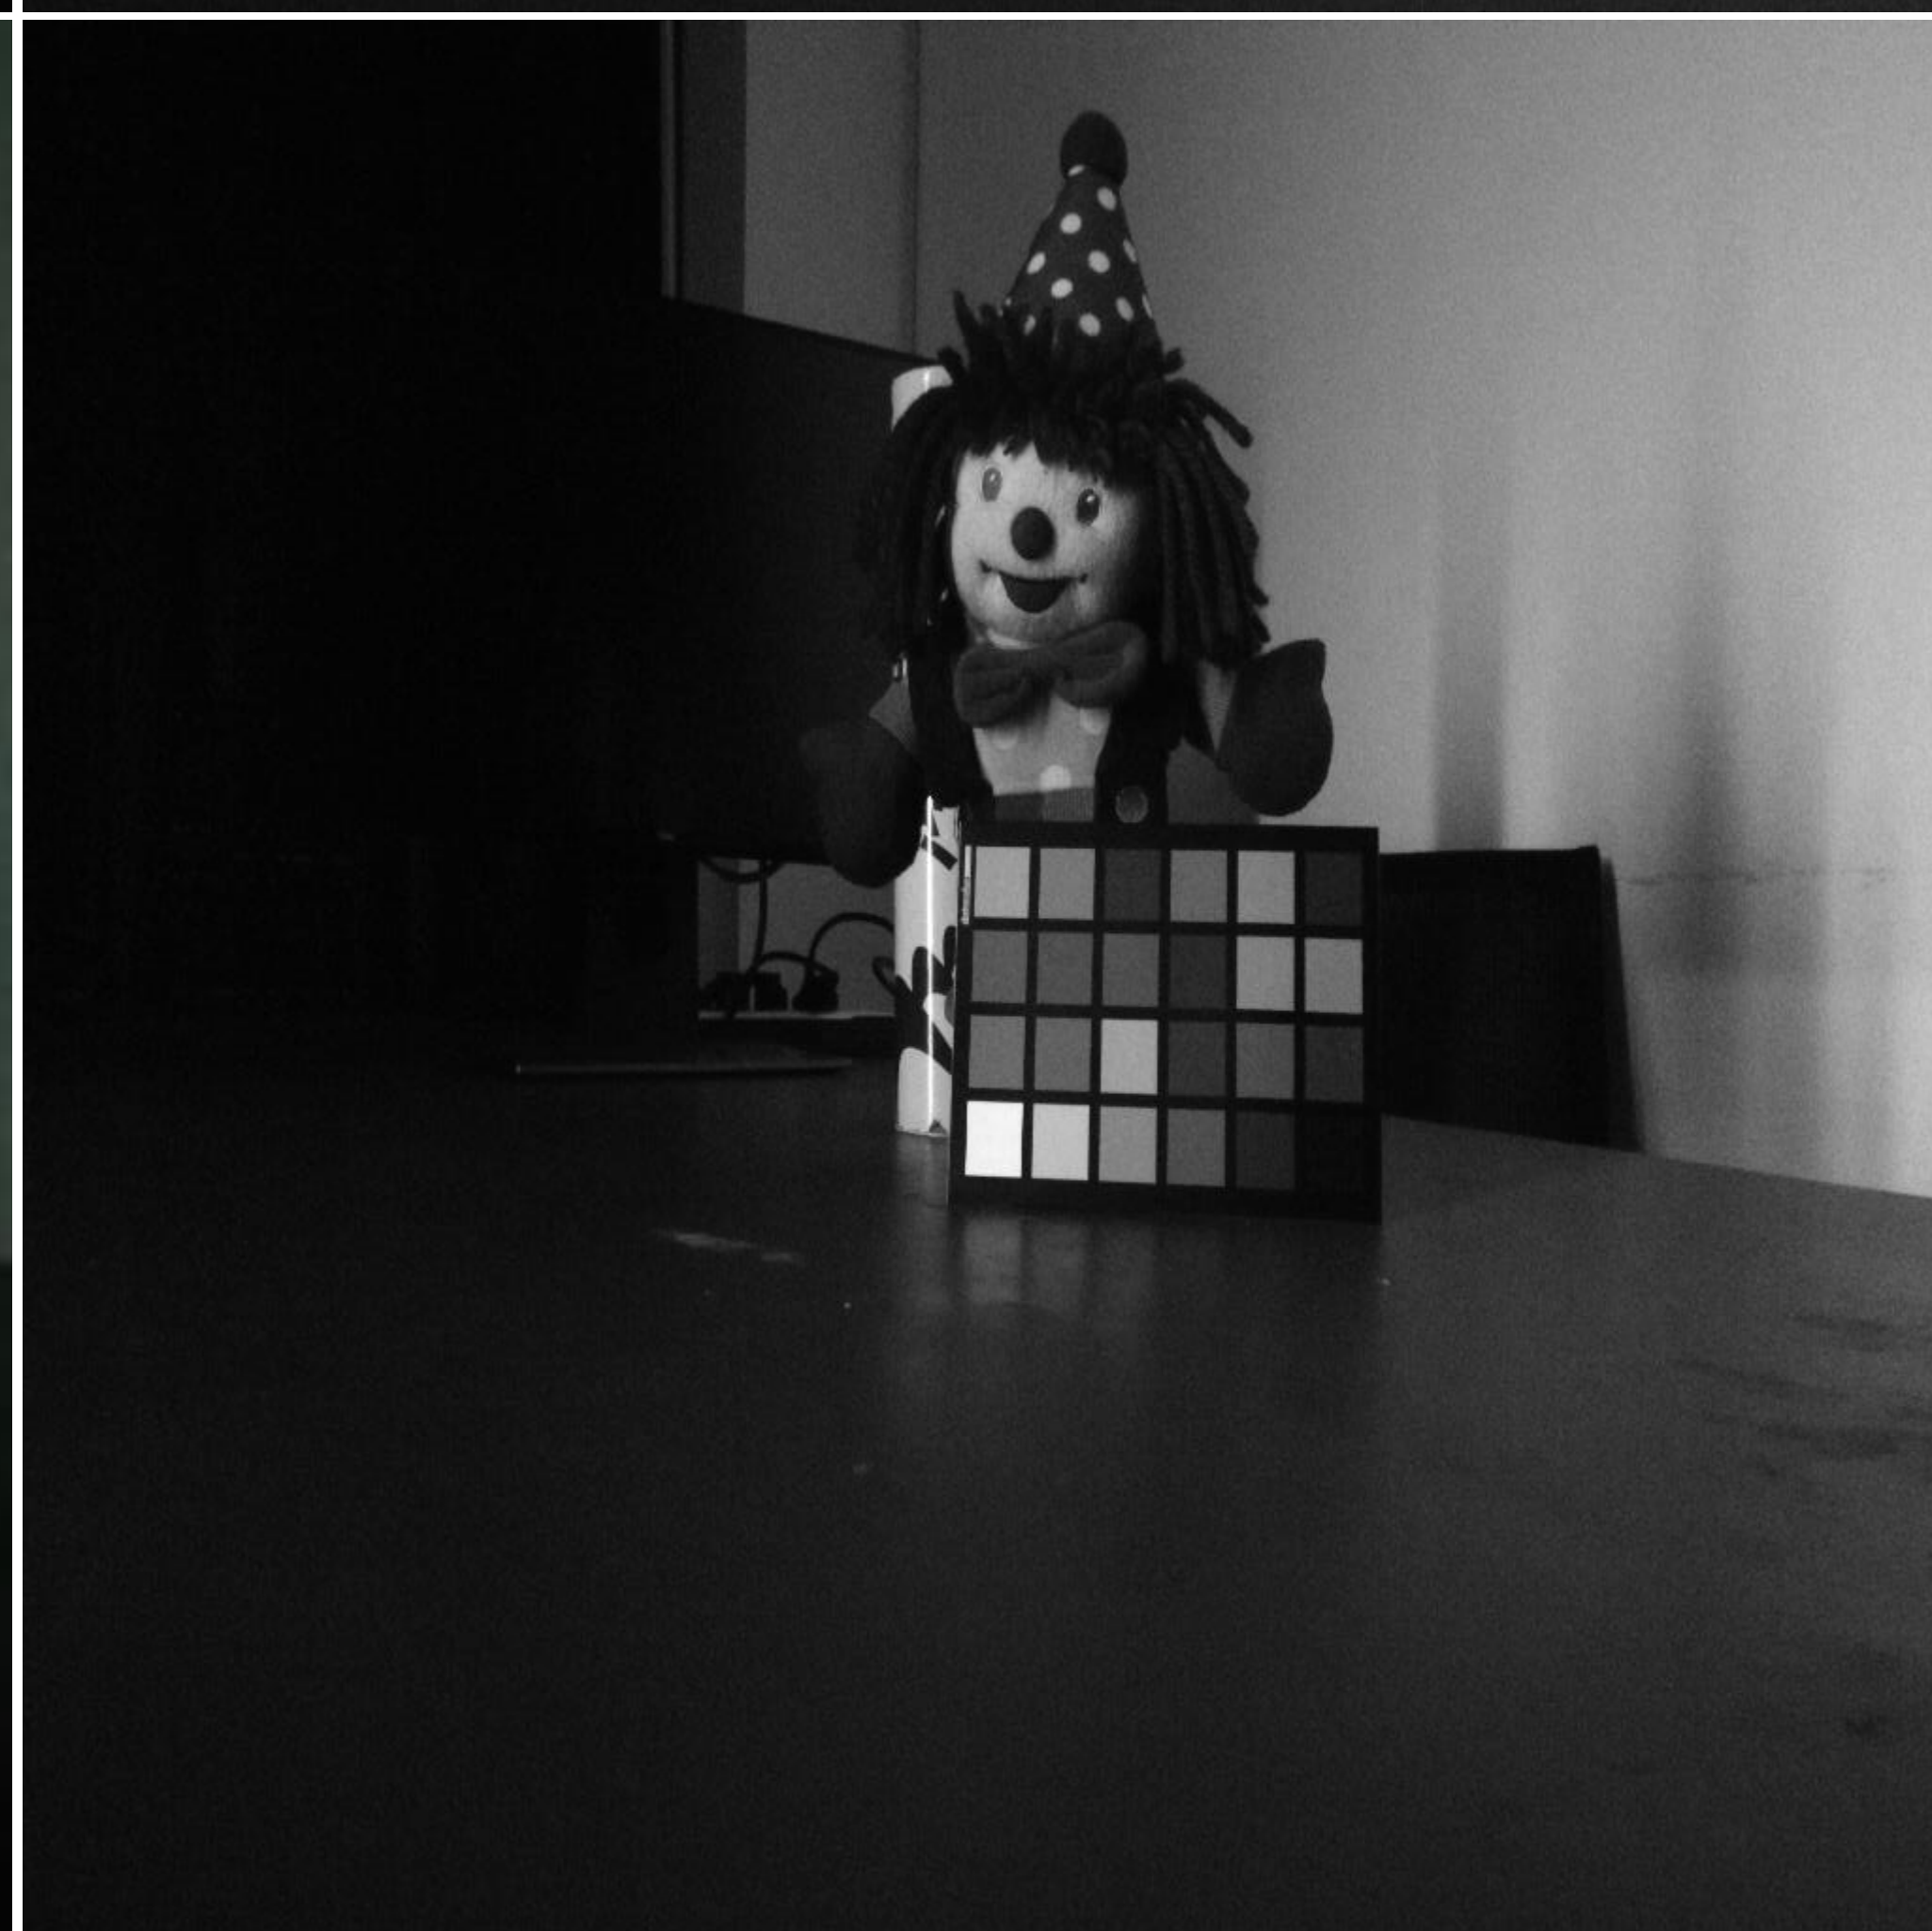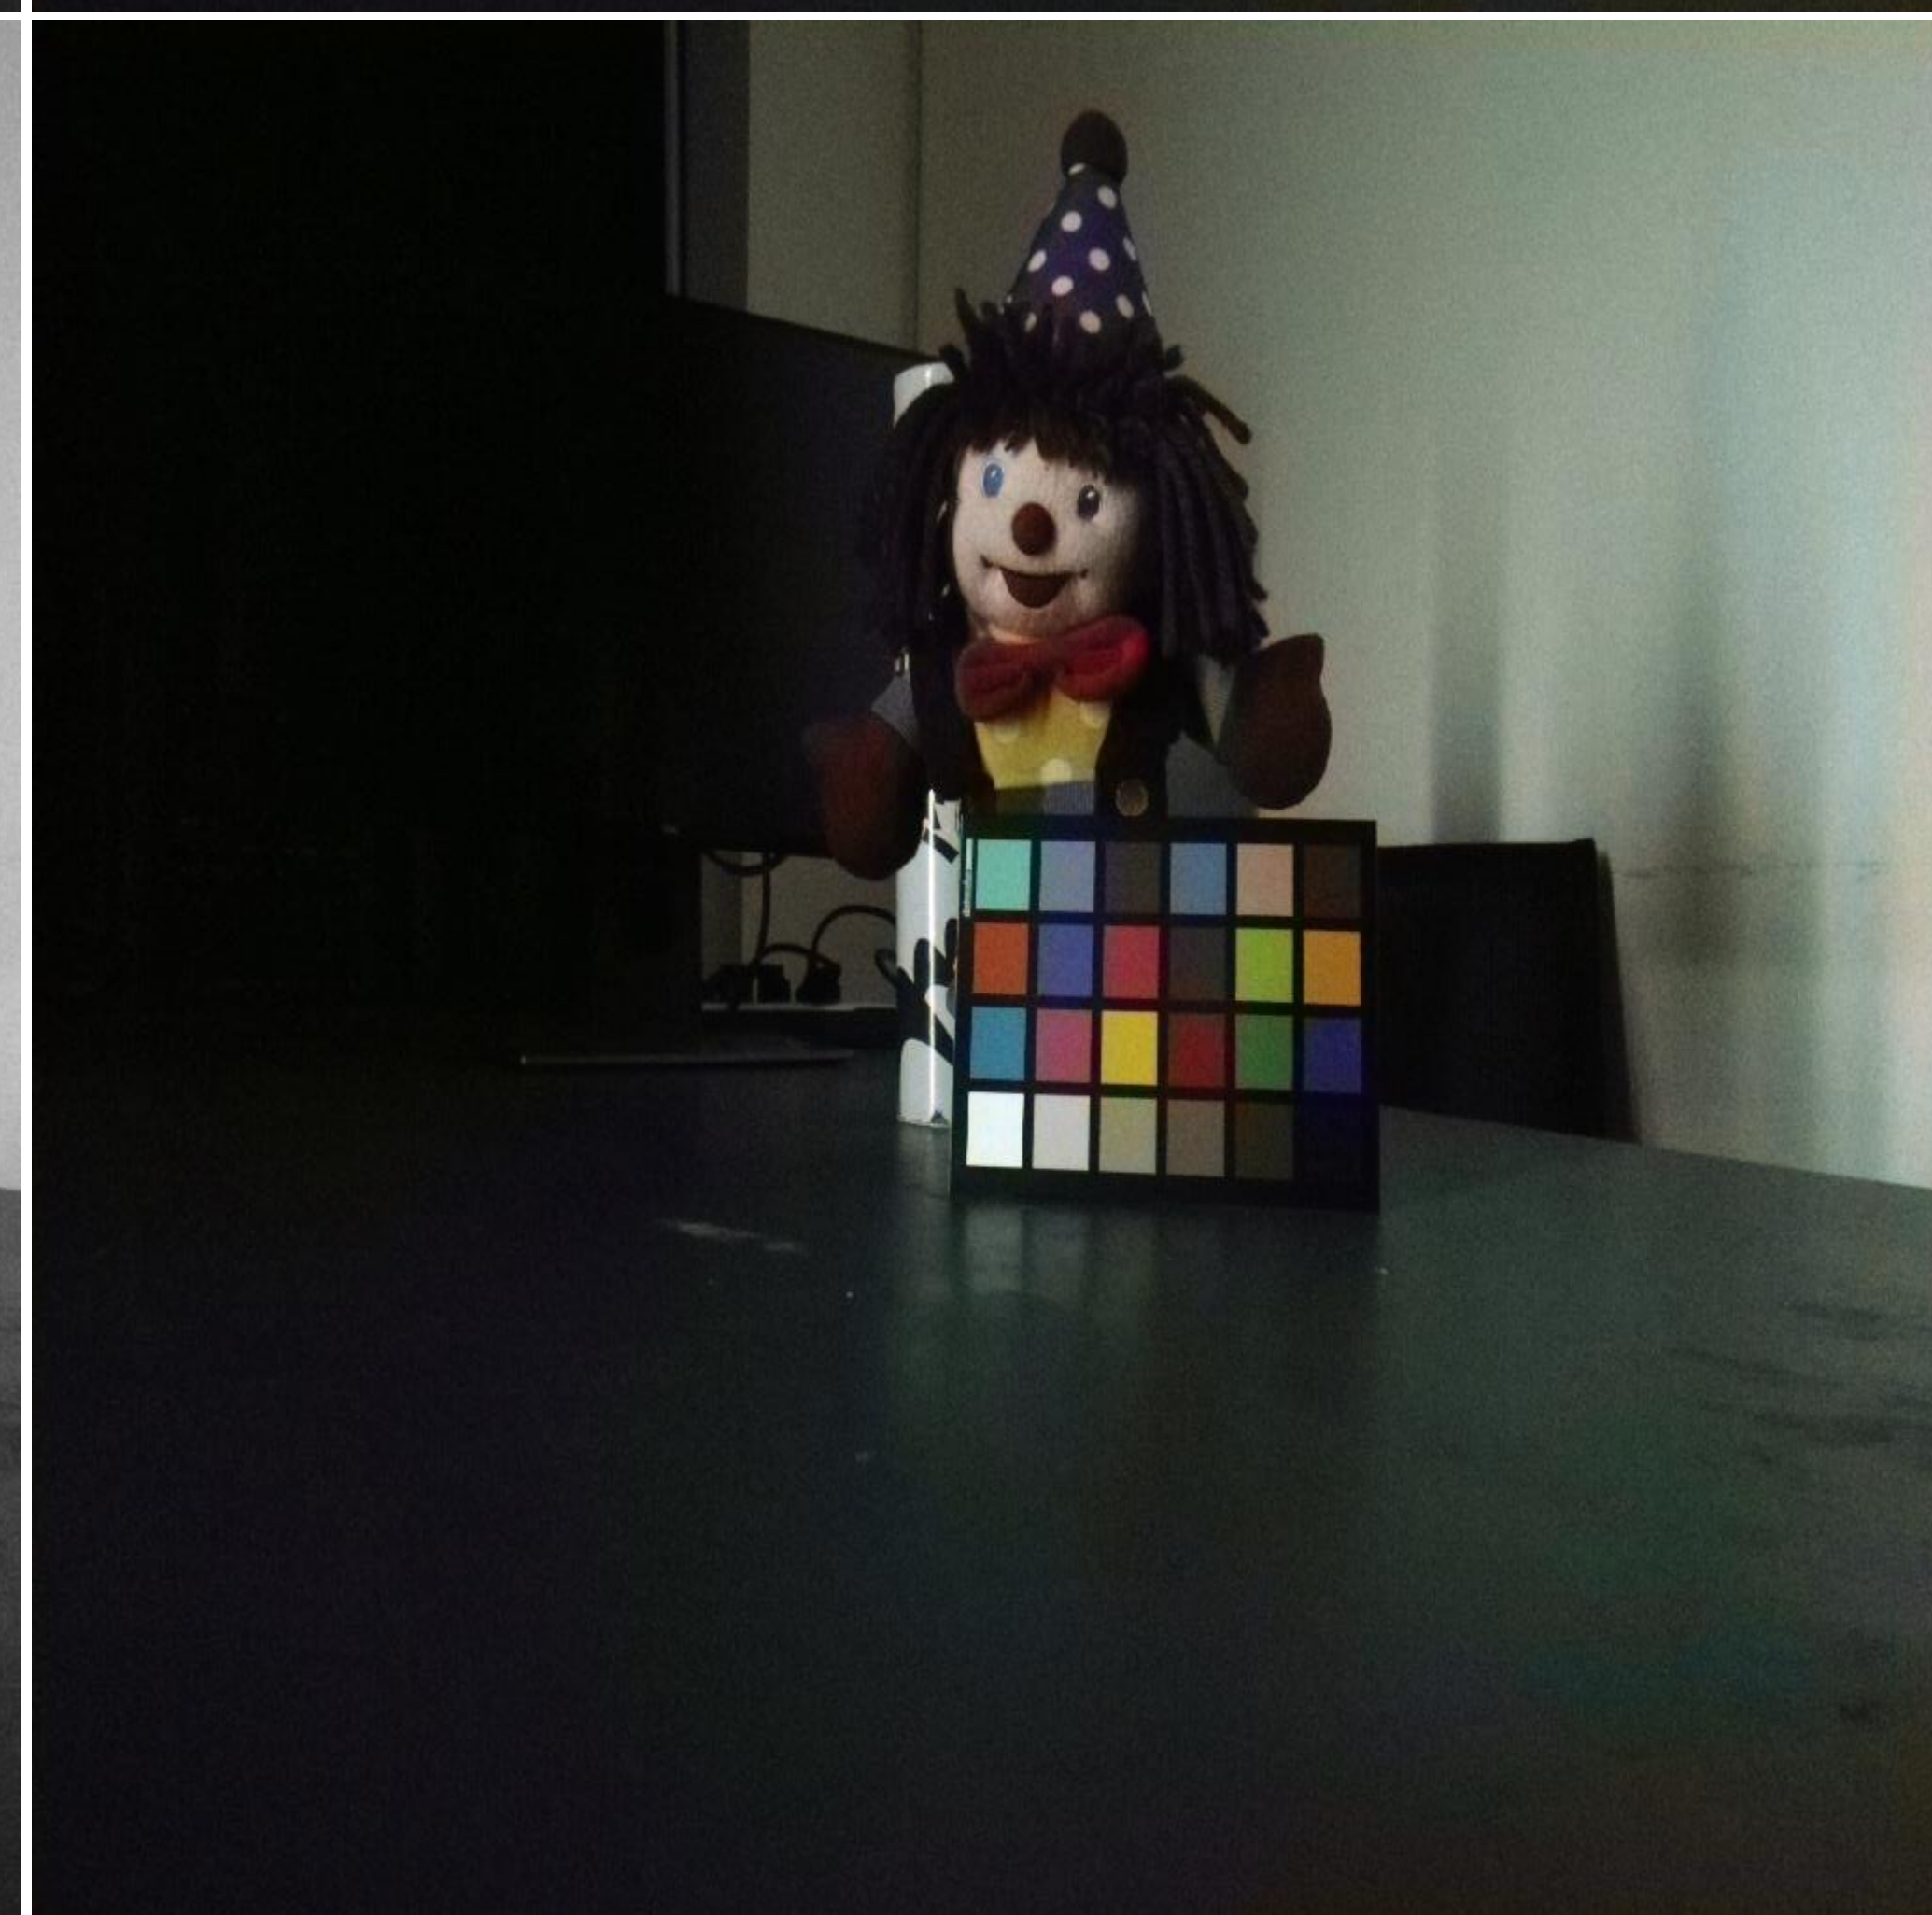

Supplement: Supplementary file 11 [file Guo_Low-light_Color_Imaging_ACCV_2020_supplemental.zip]

(a)

(b)

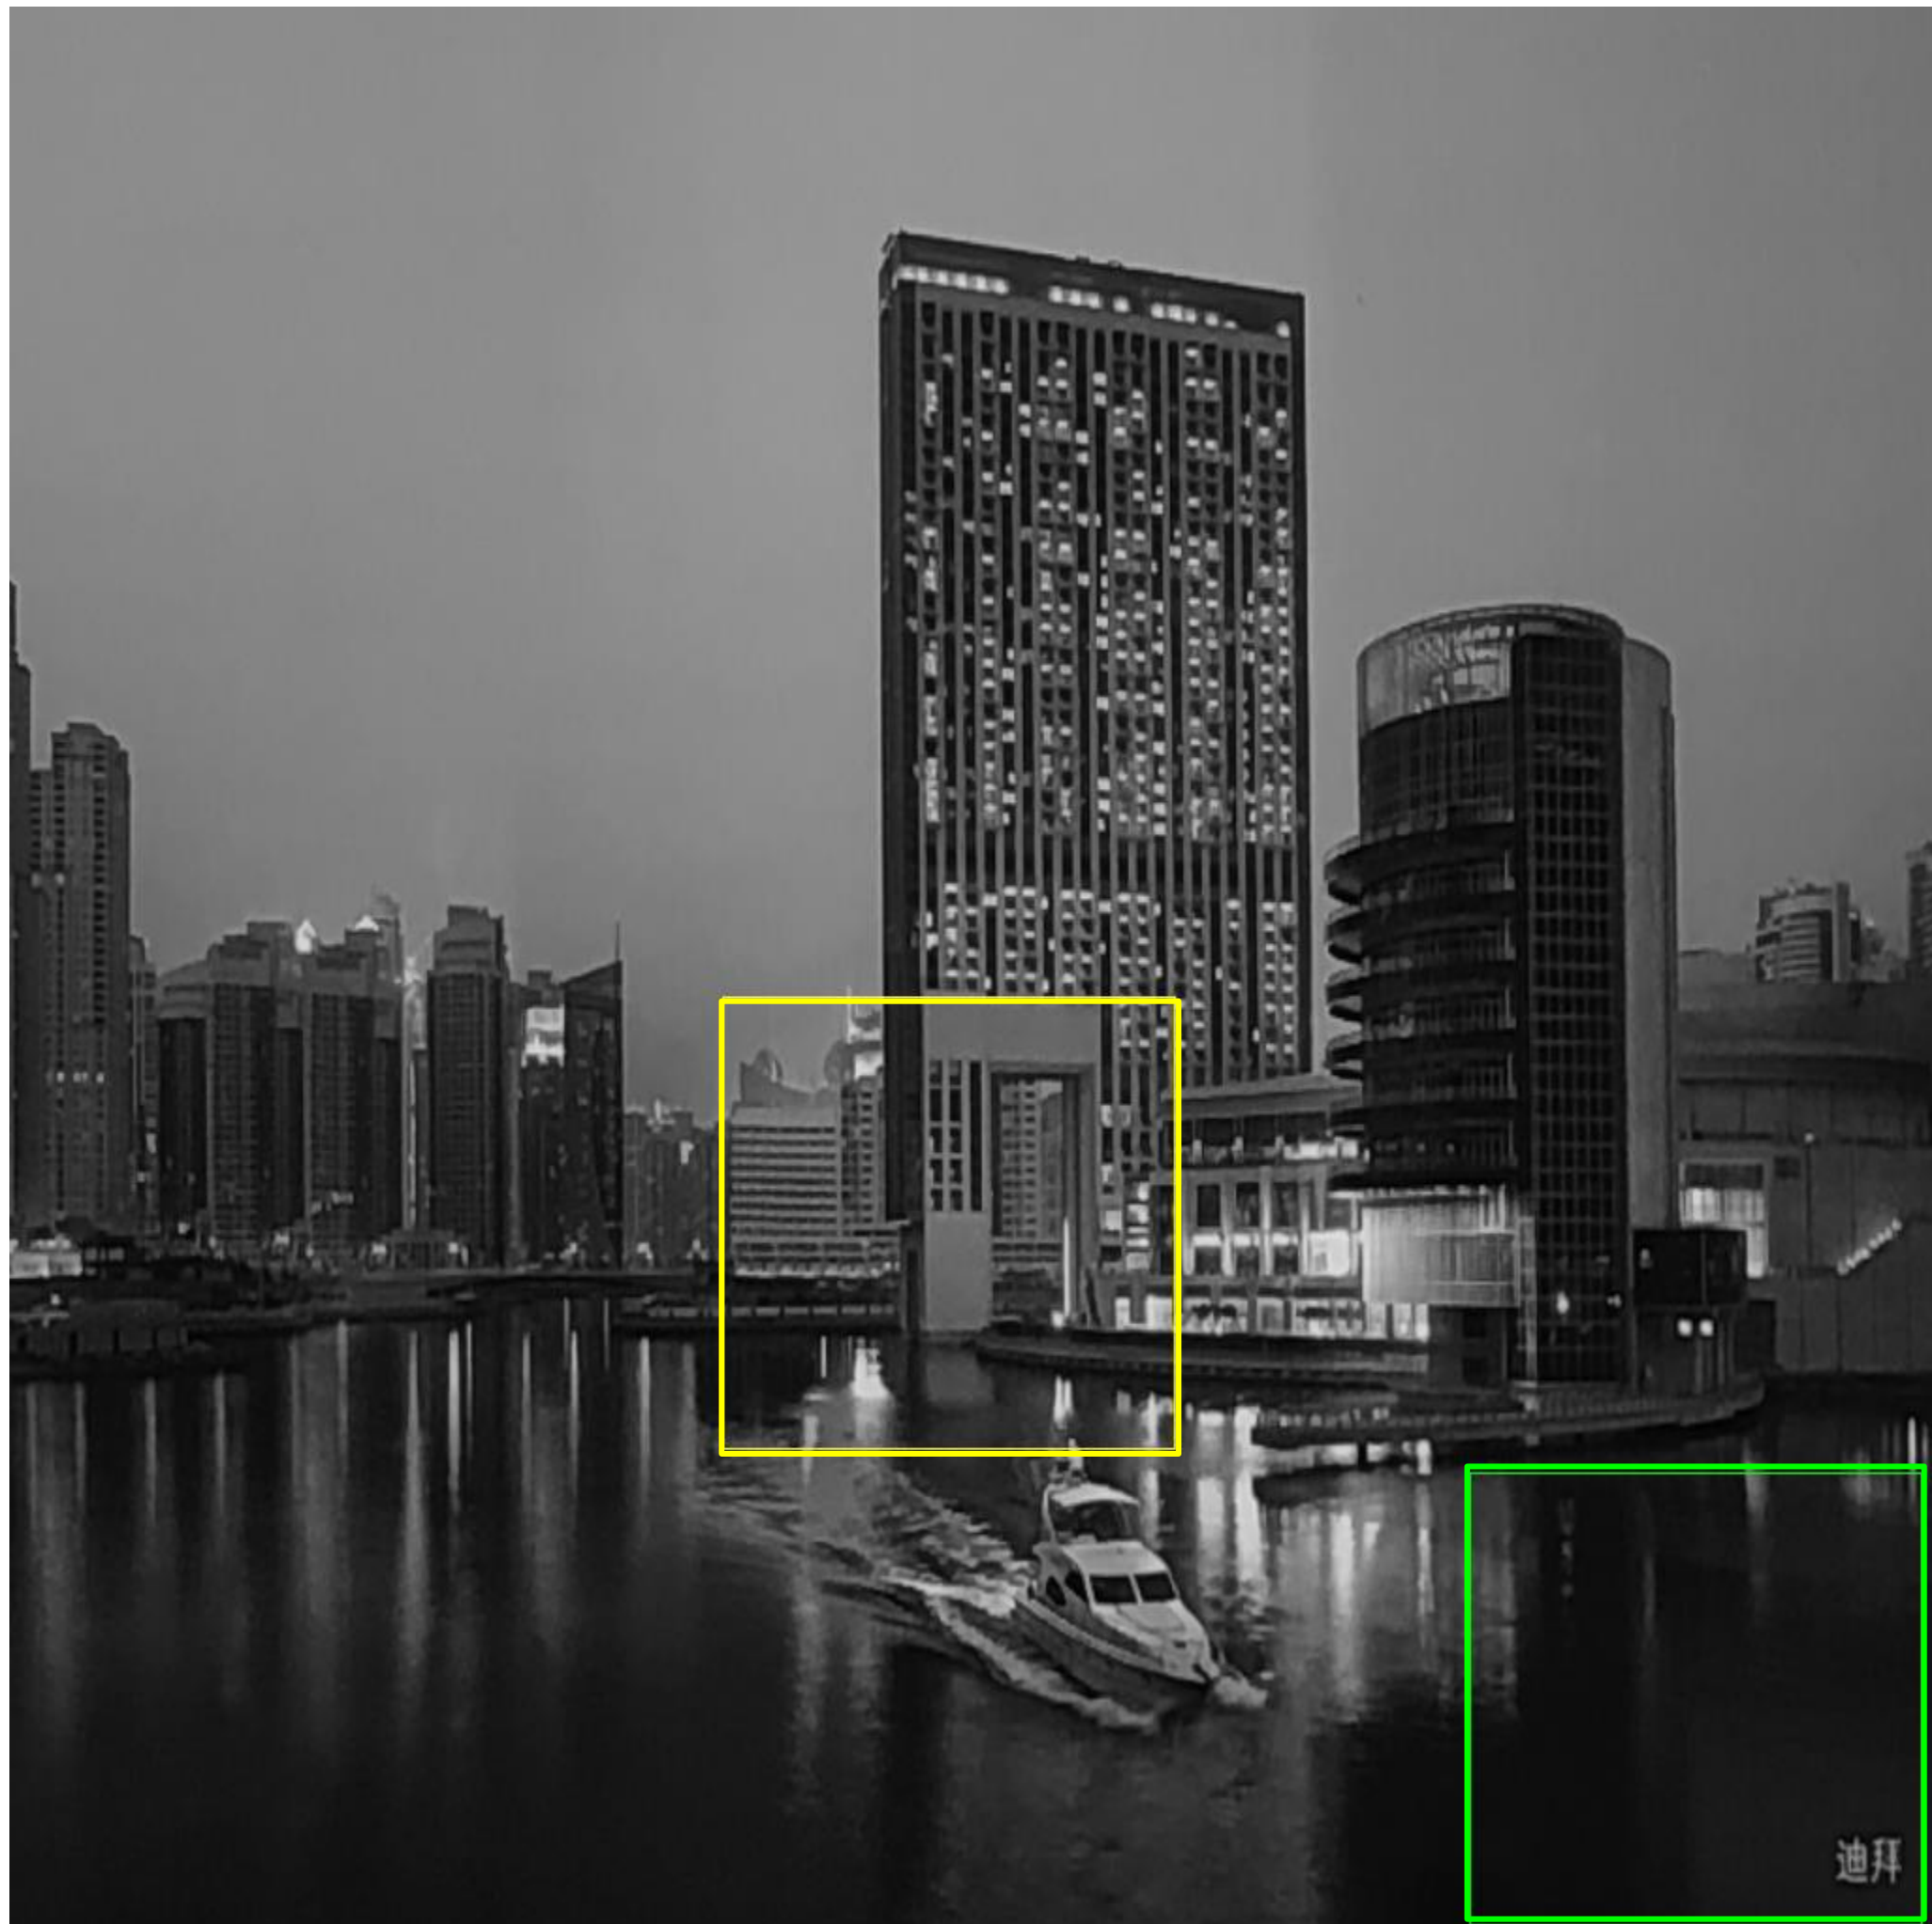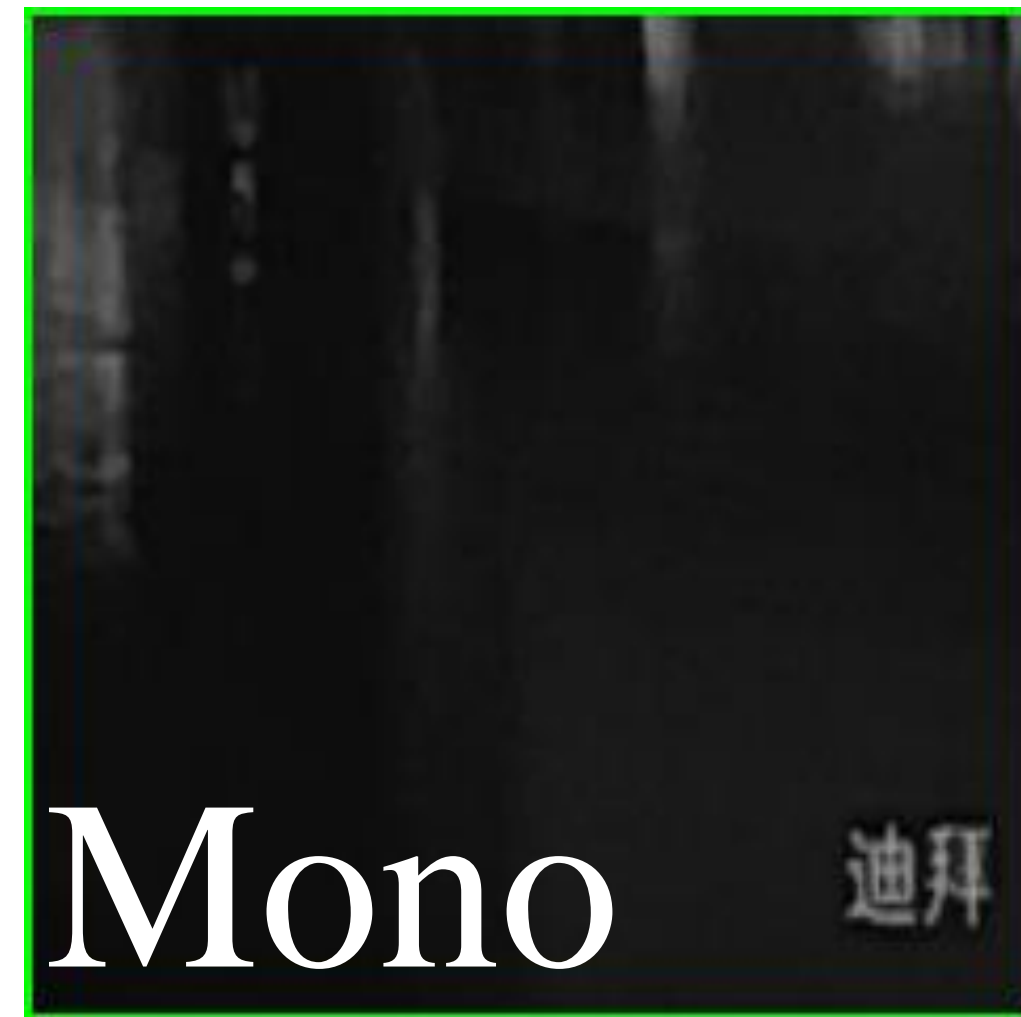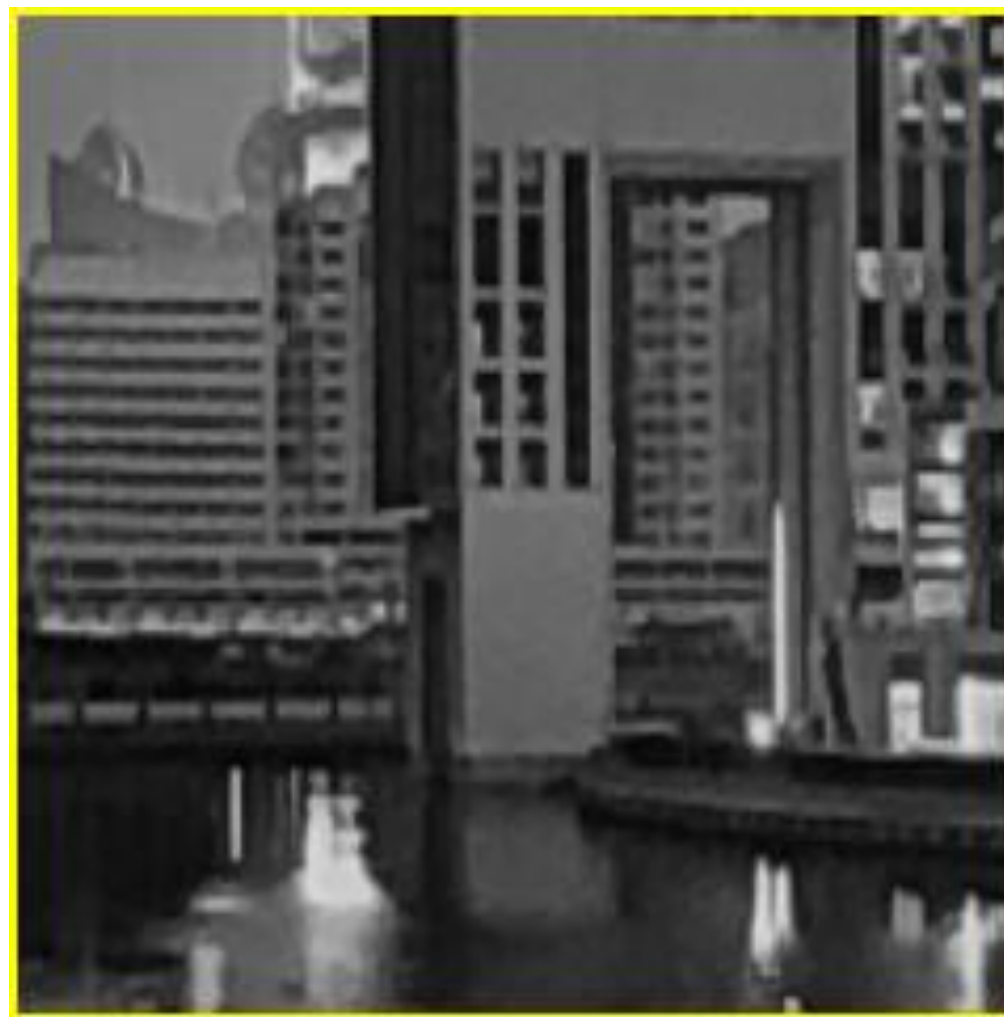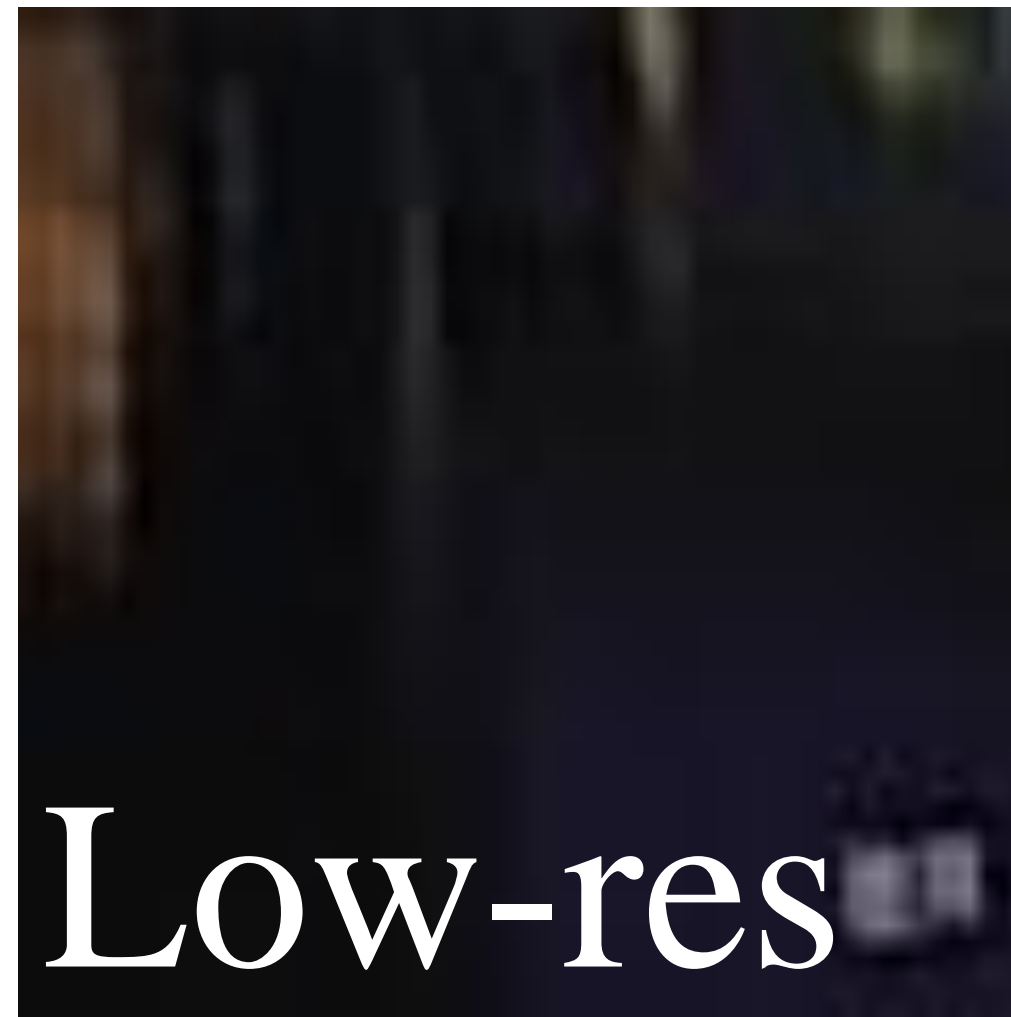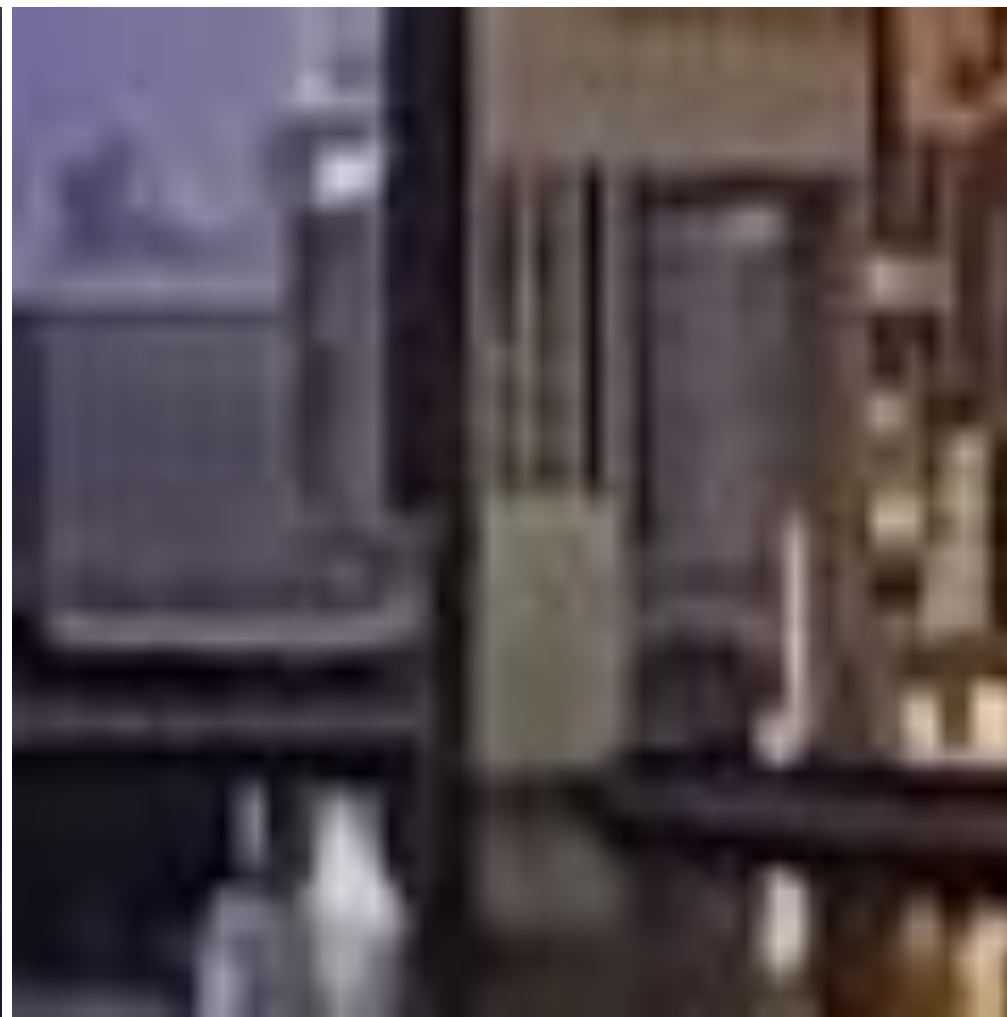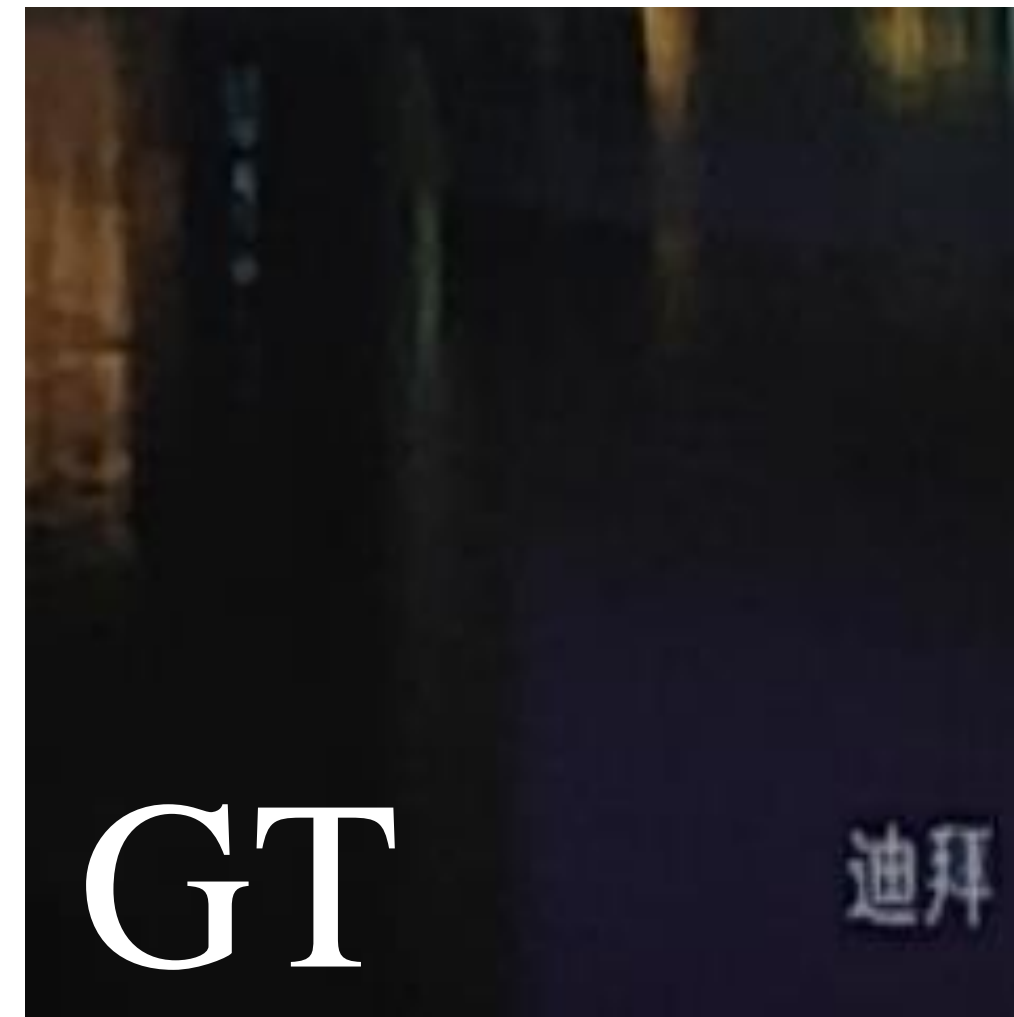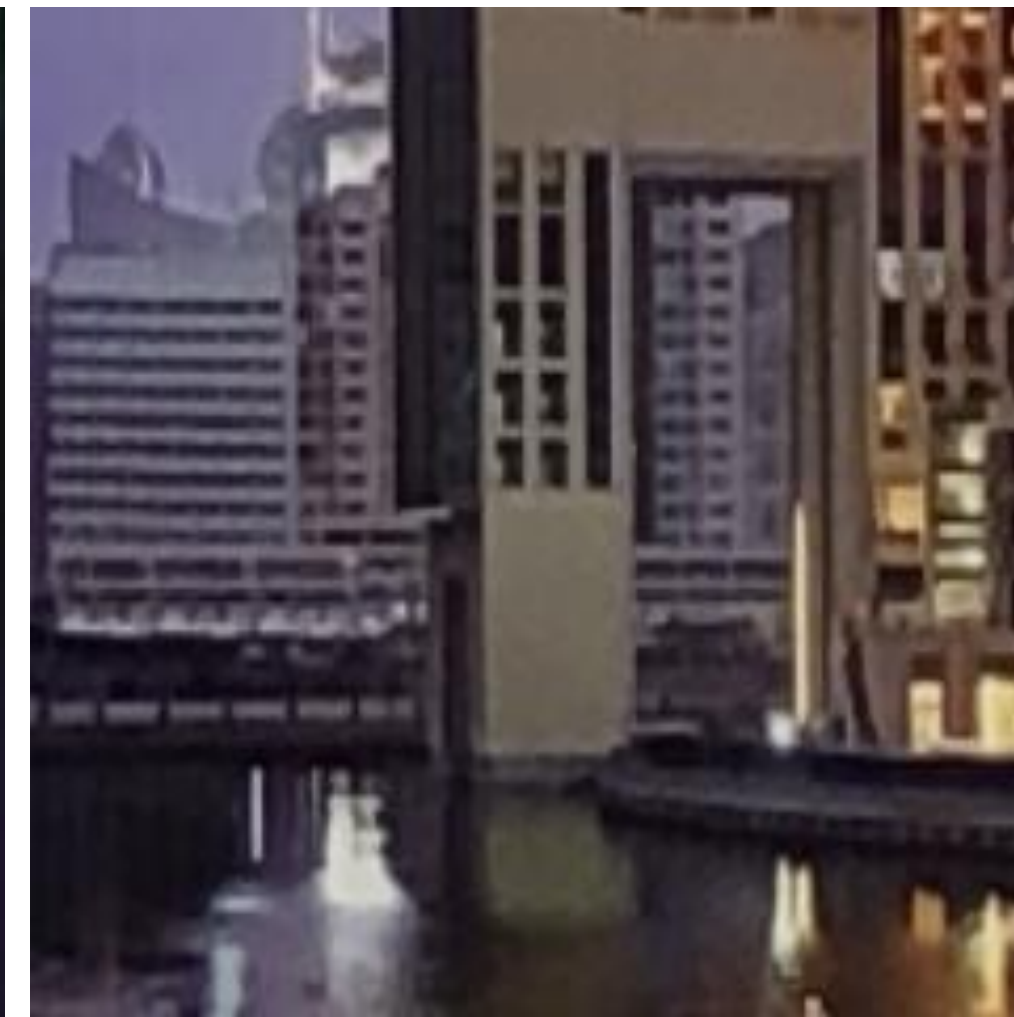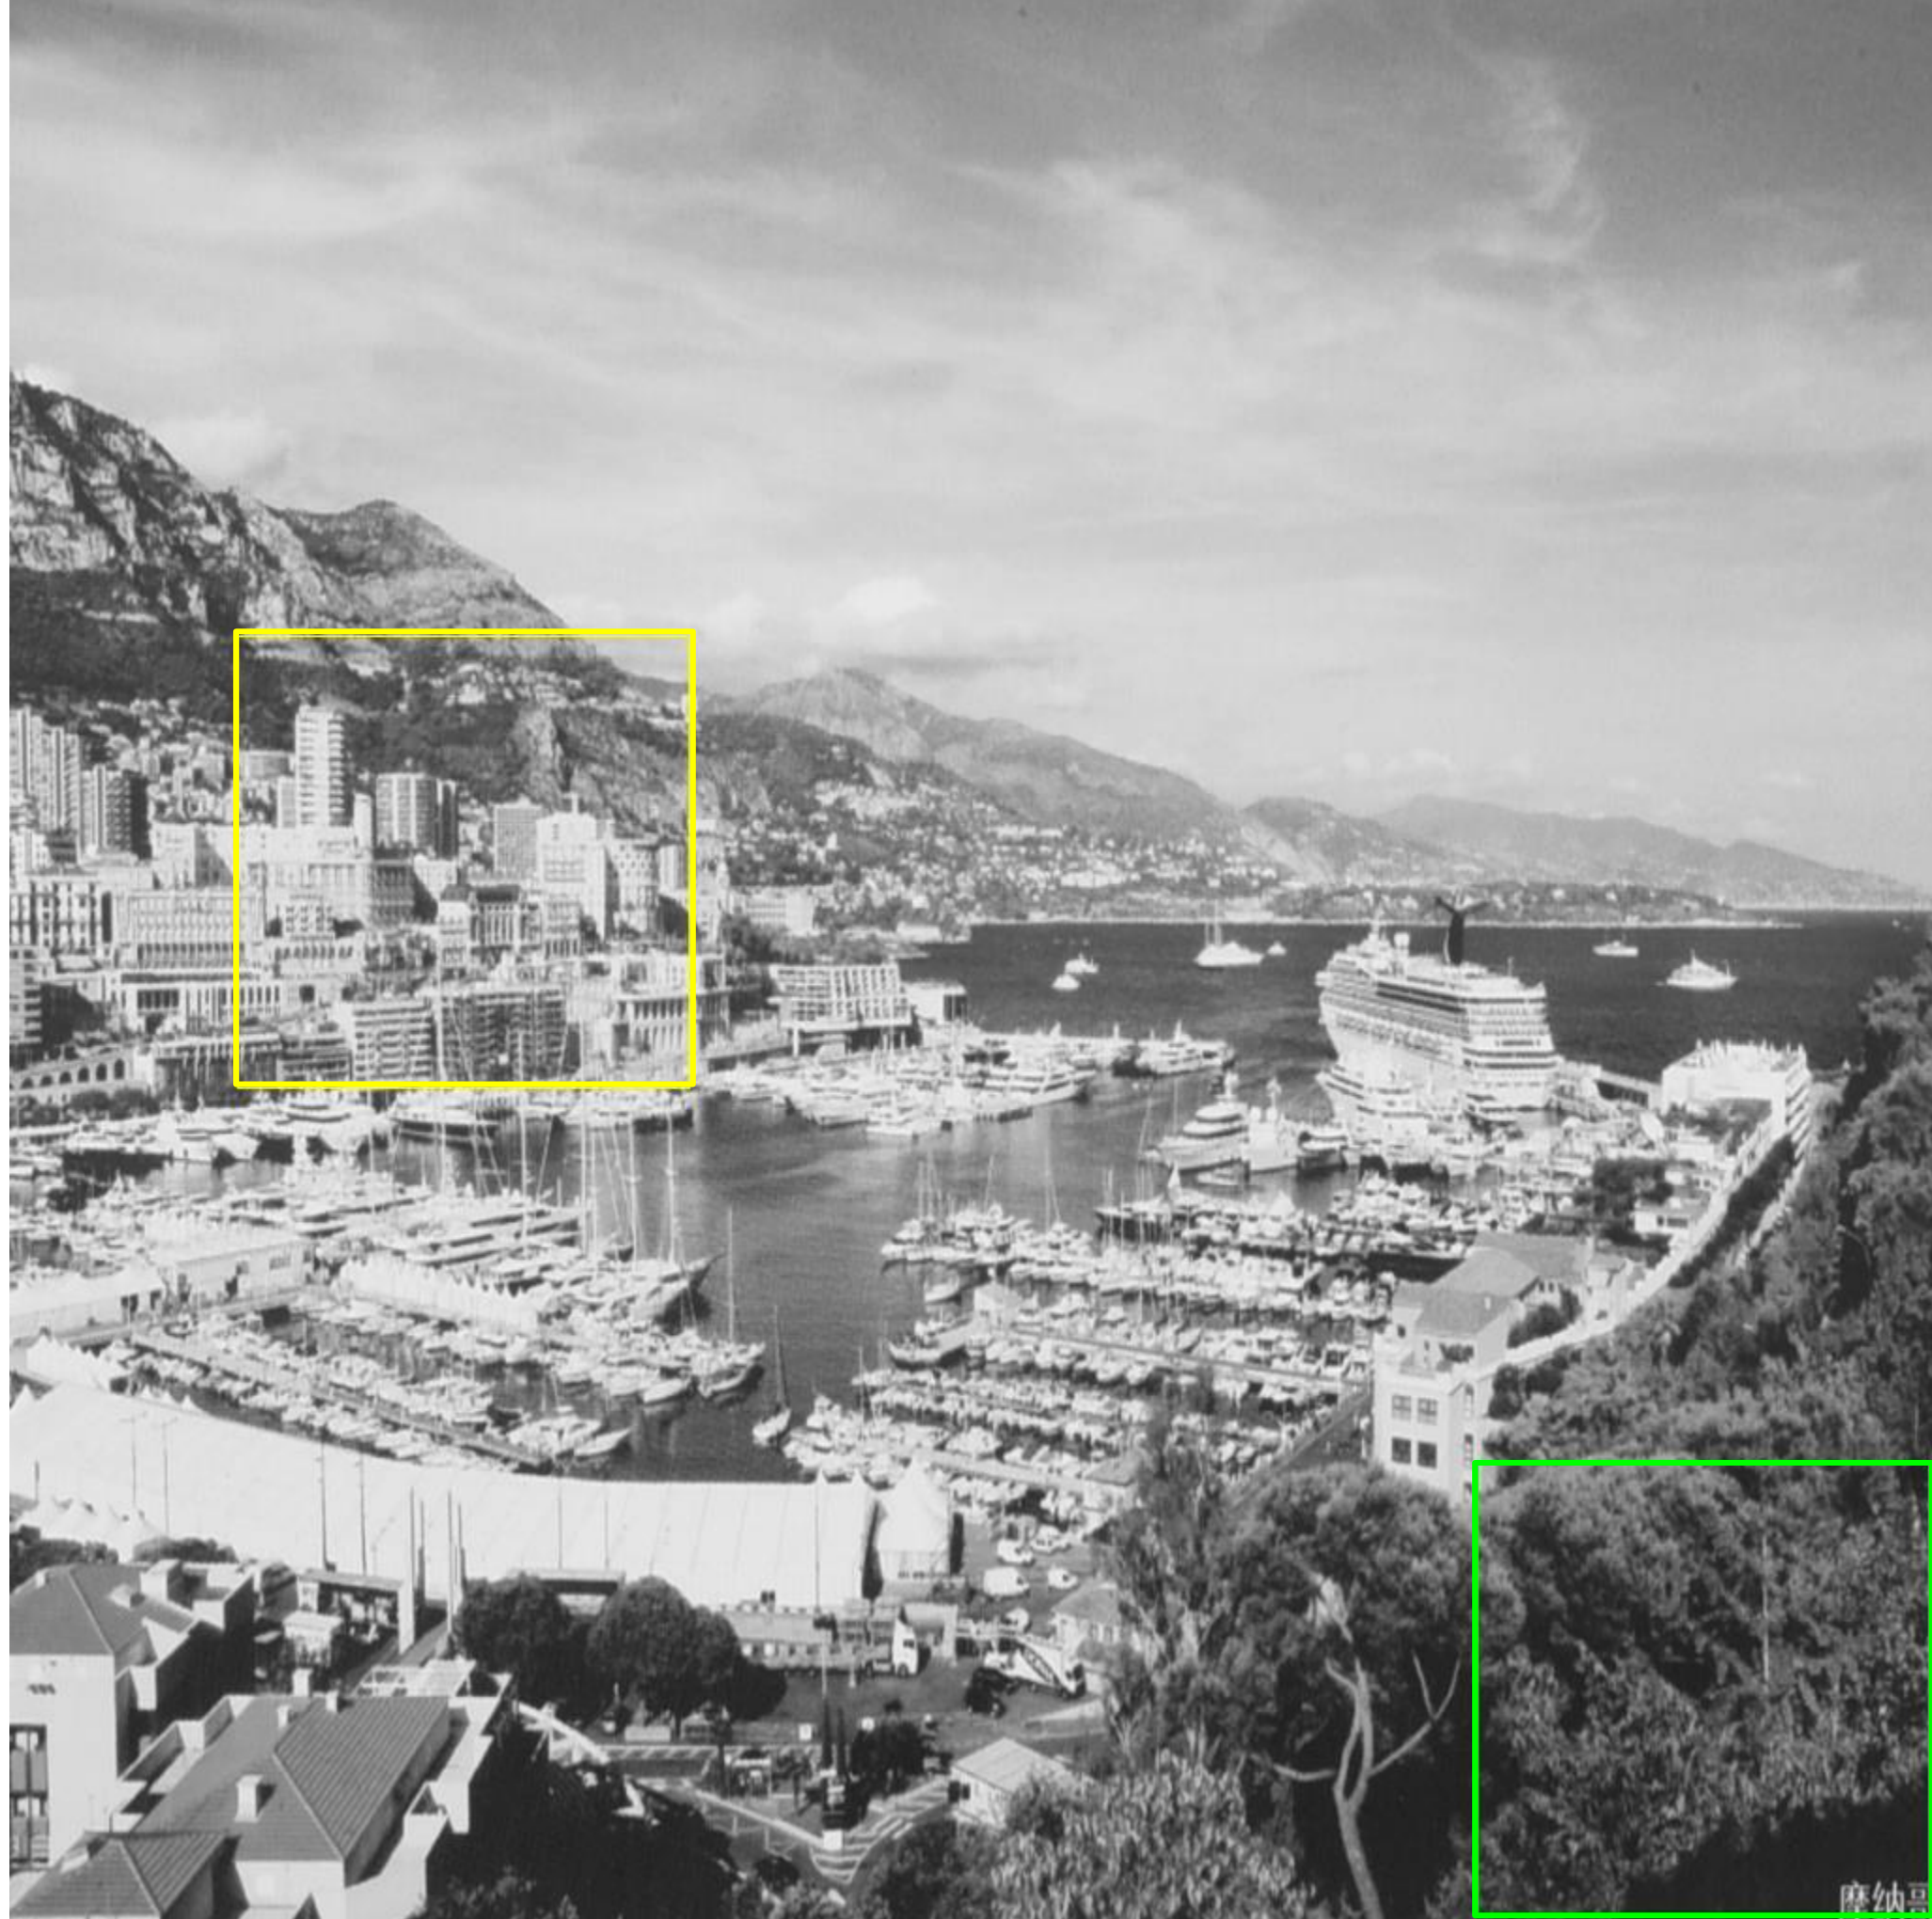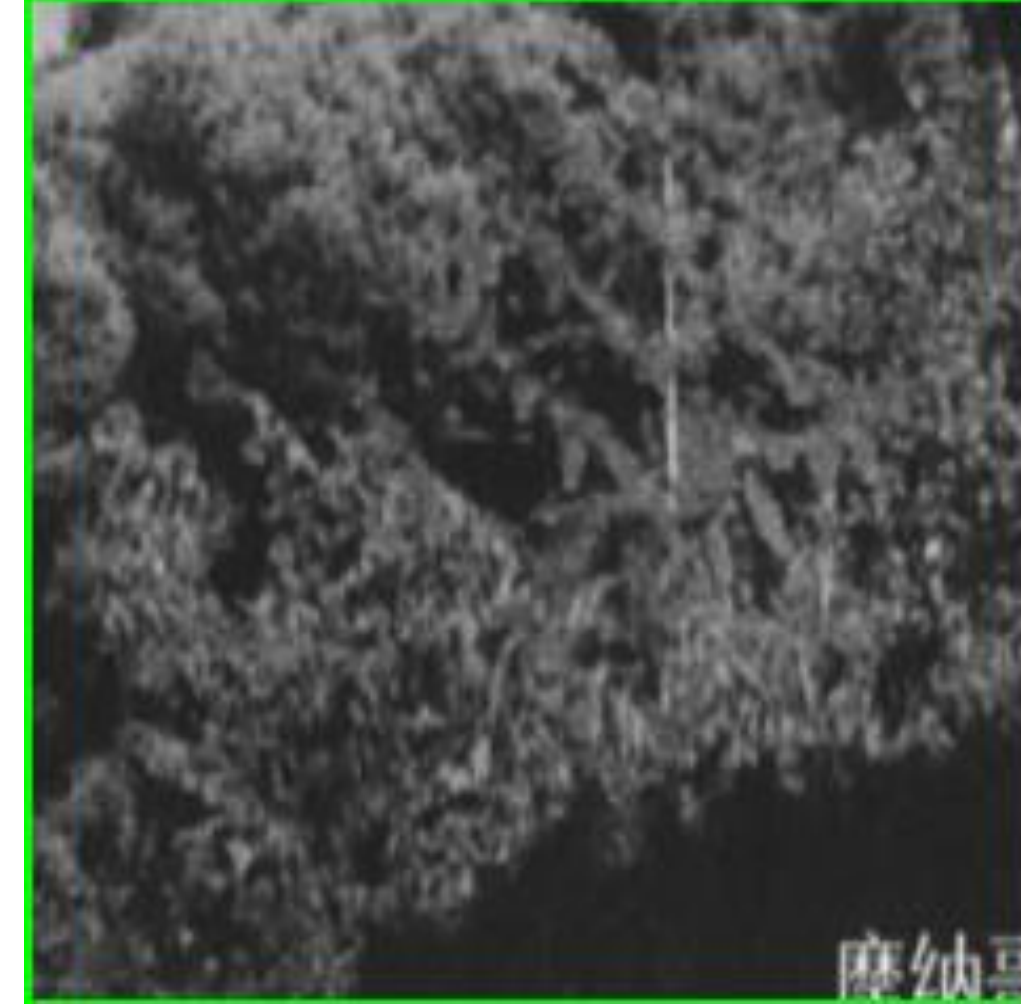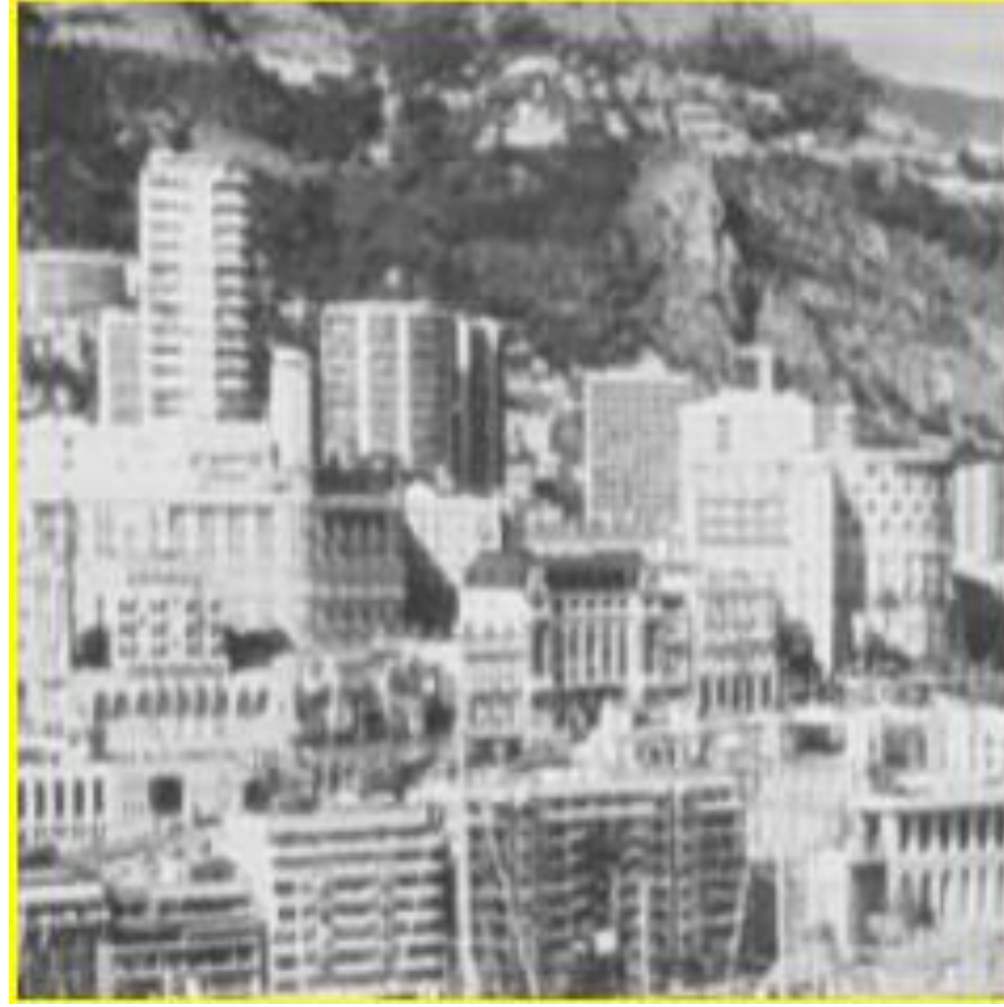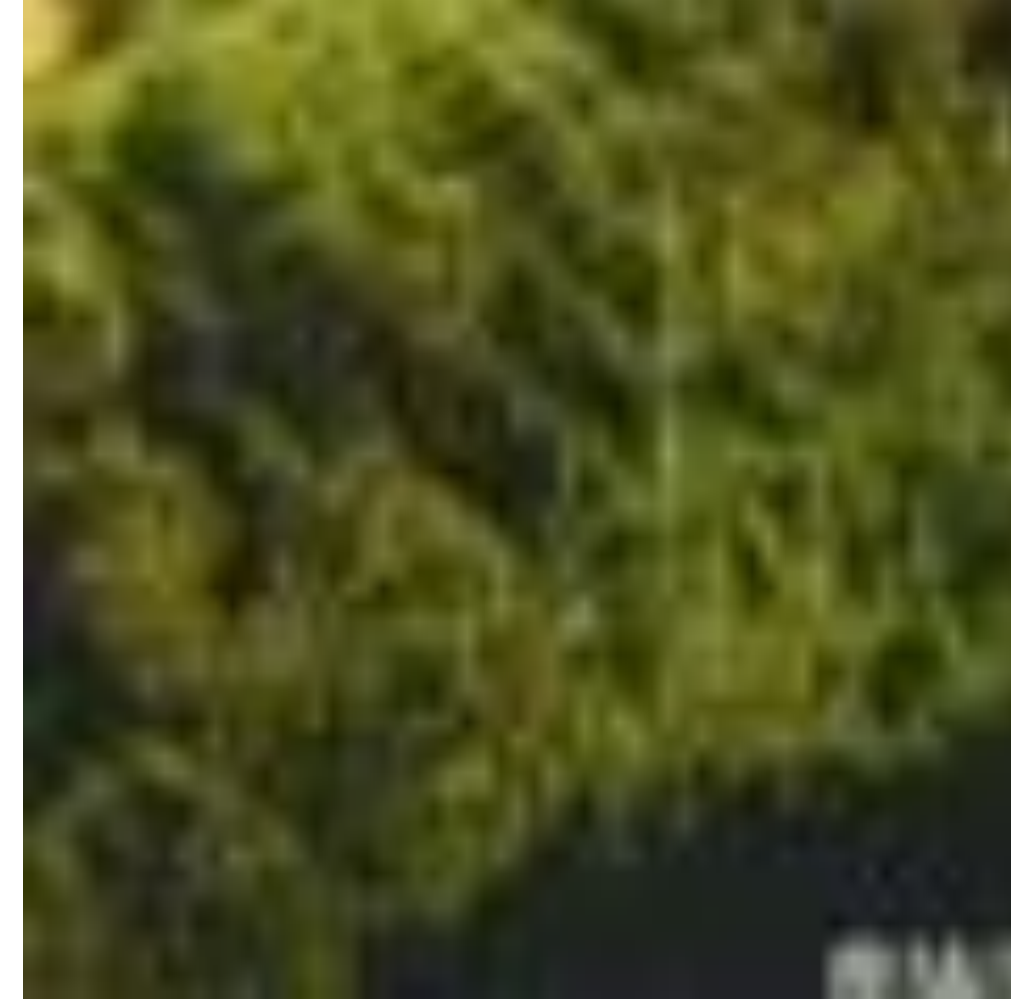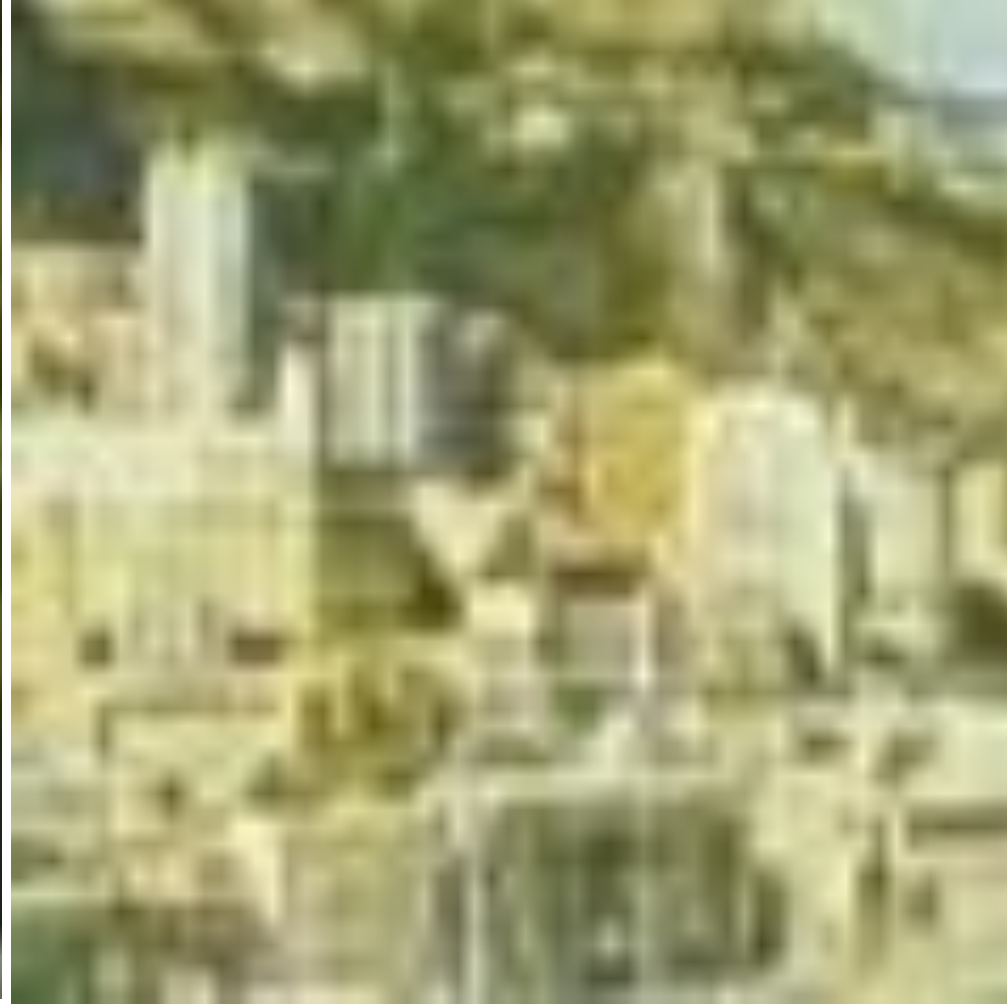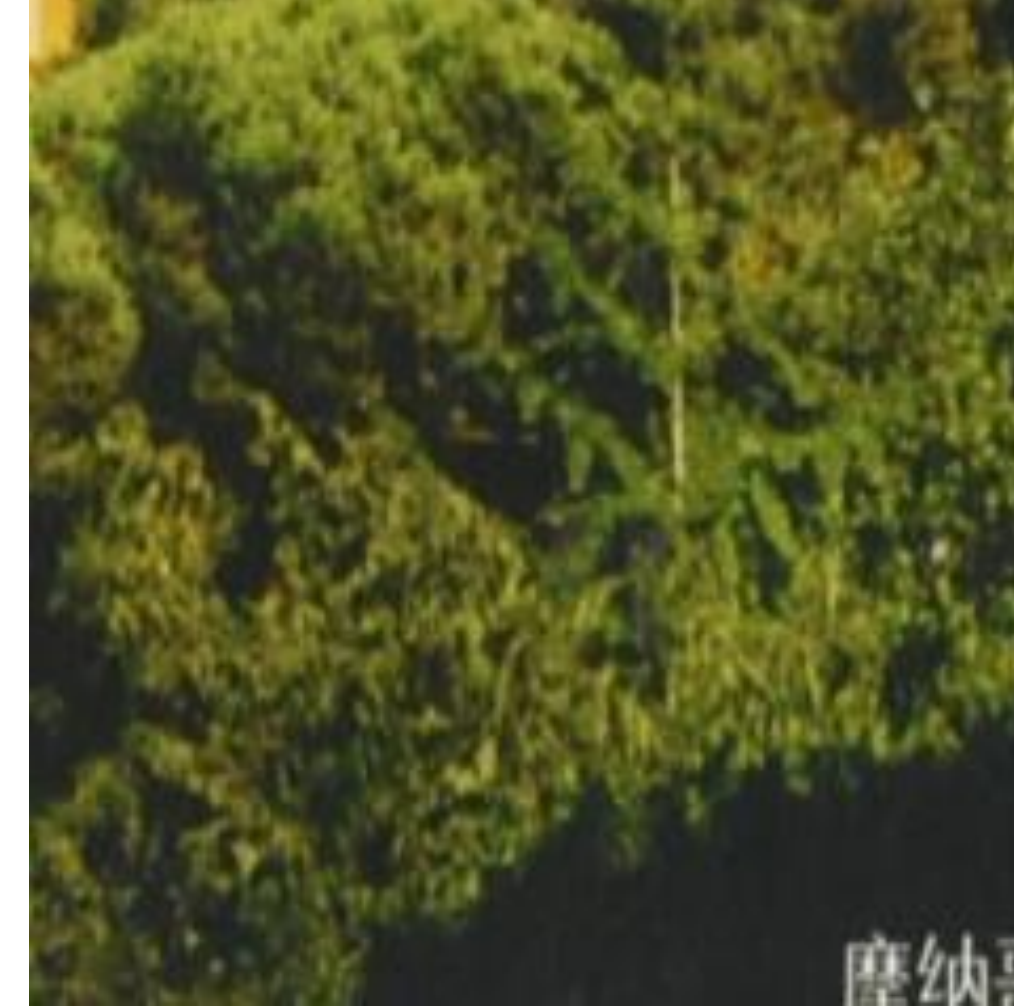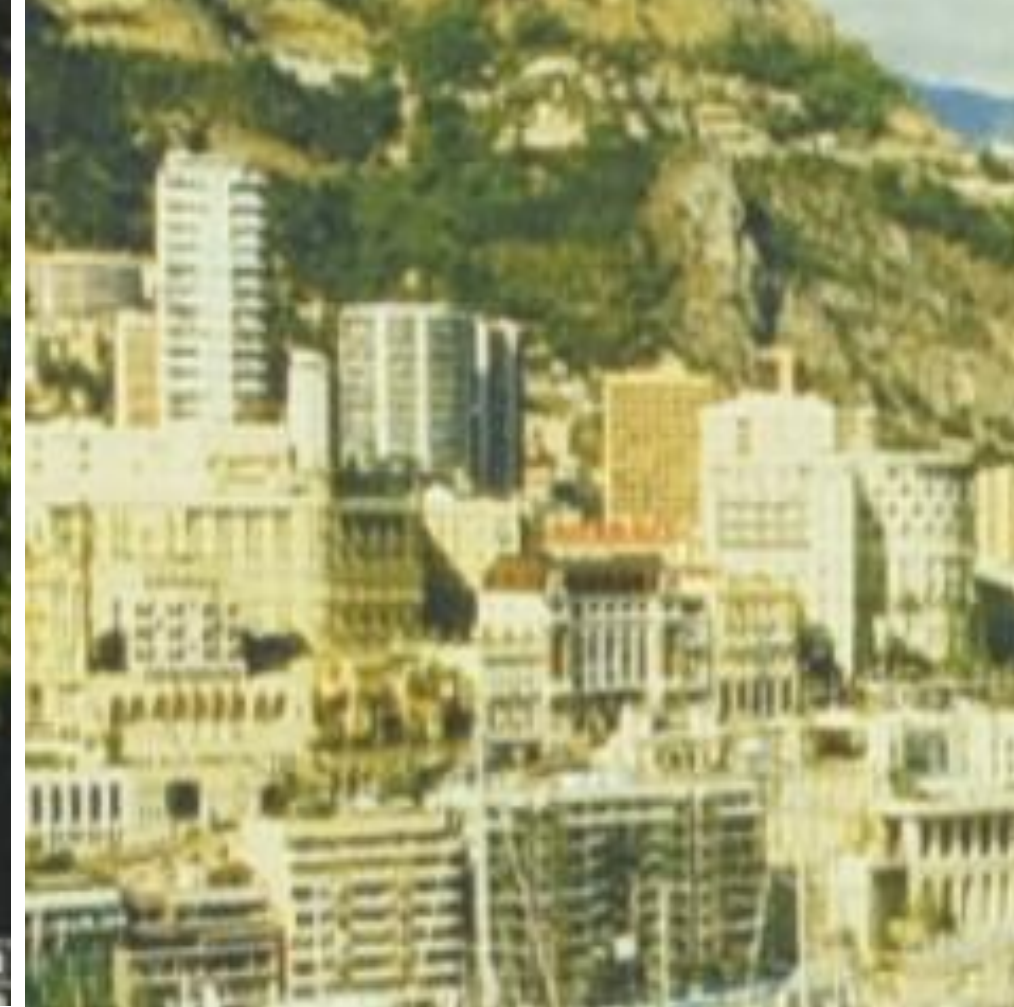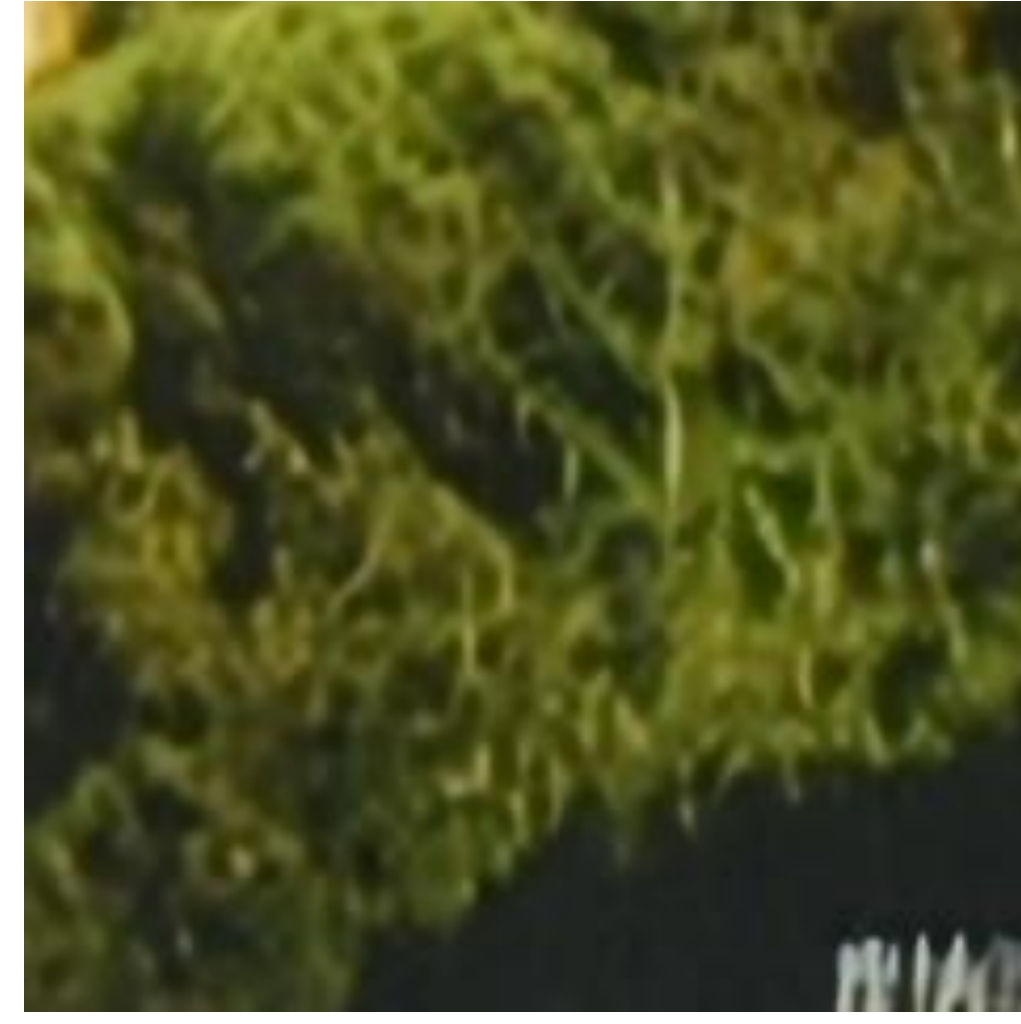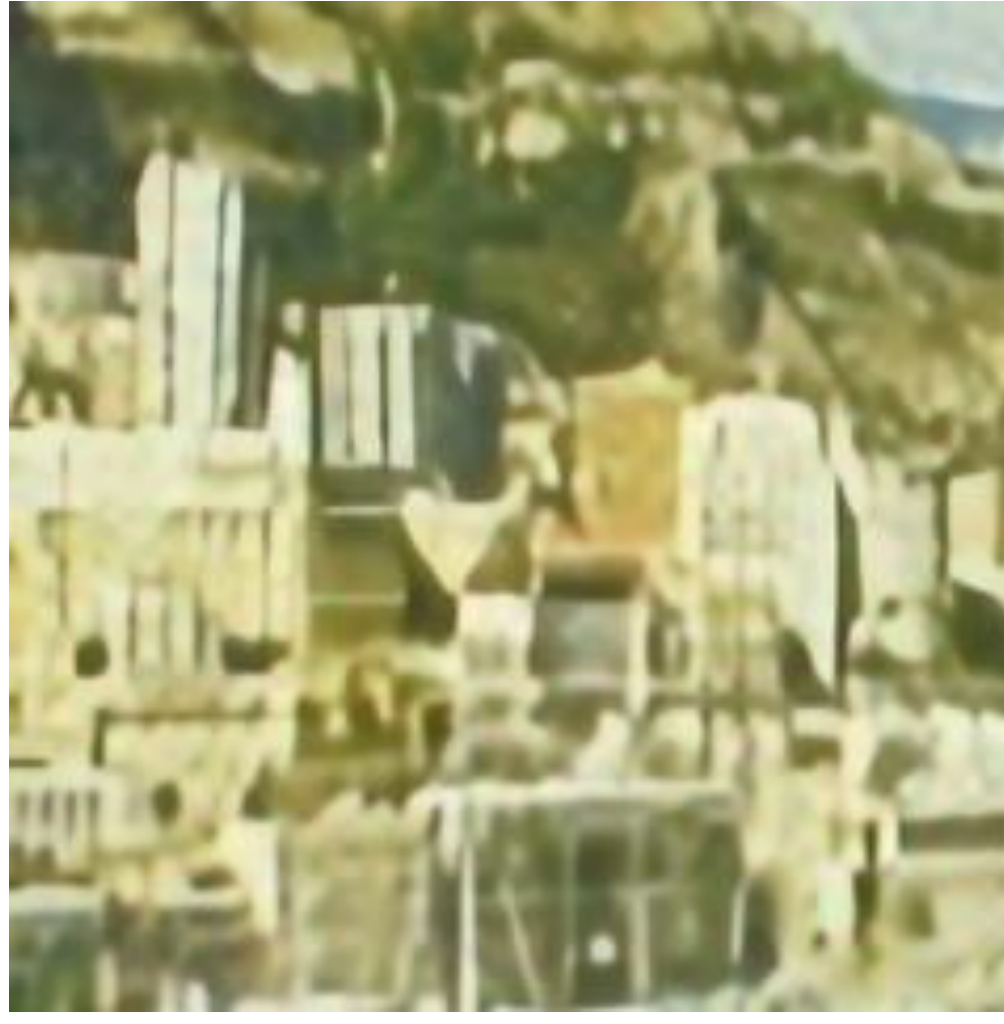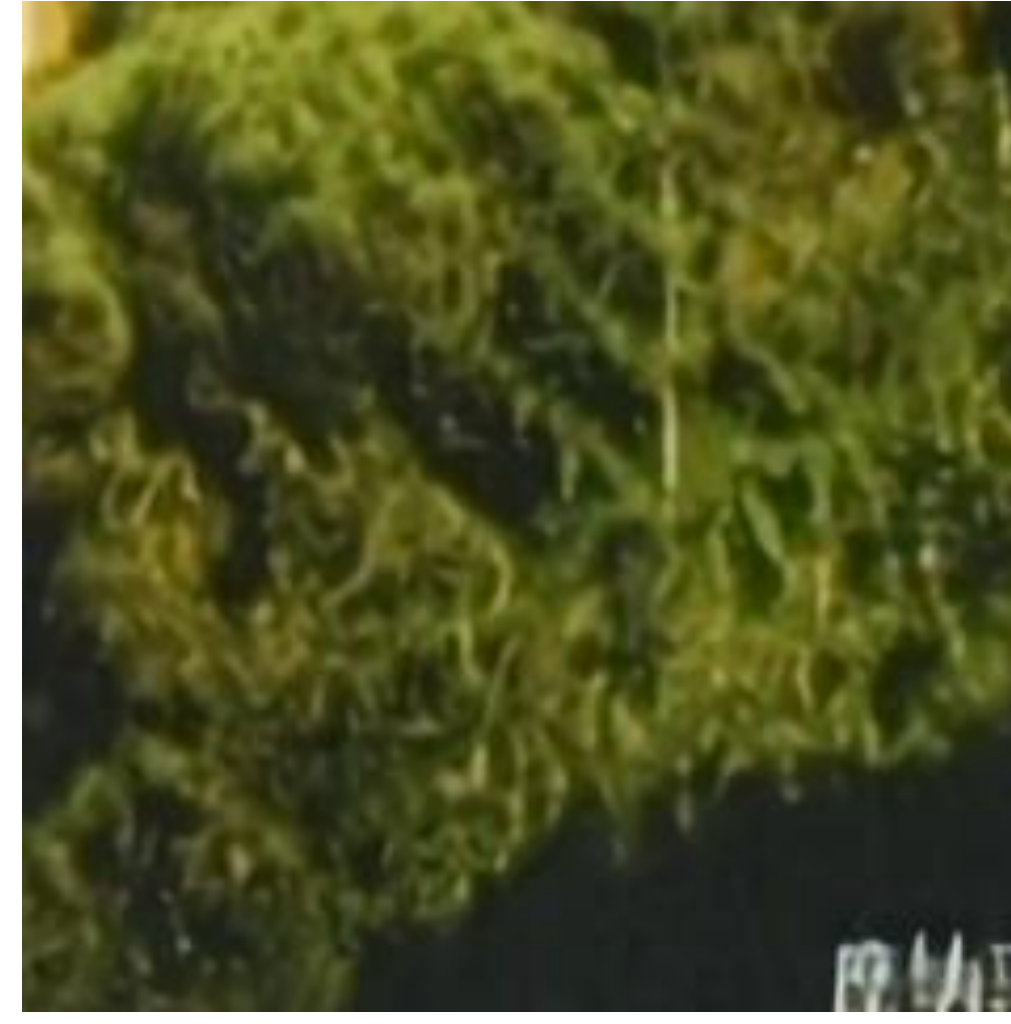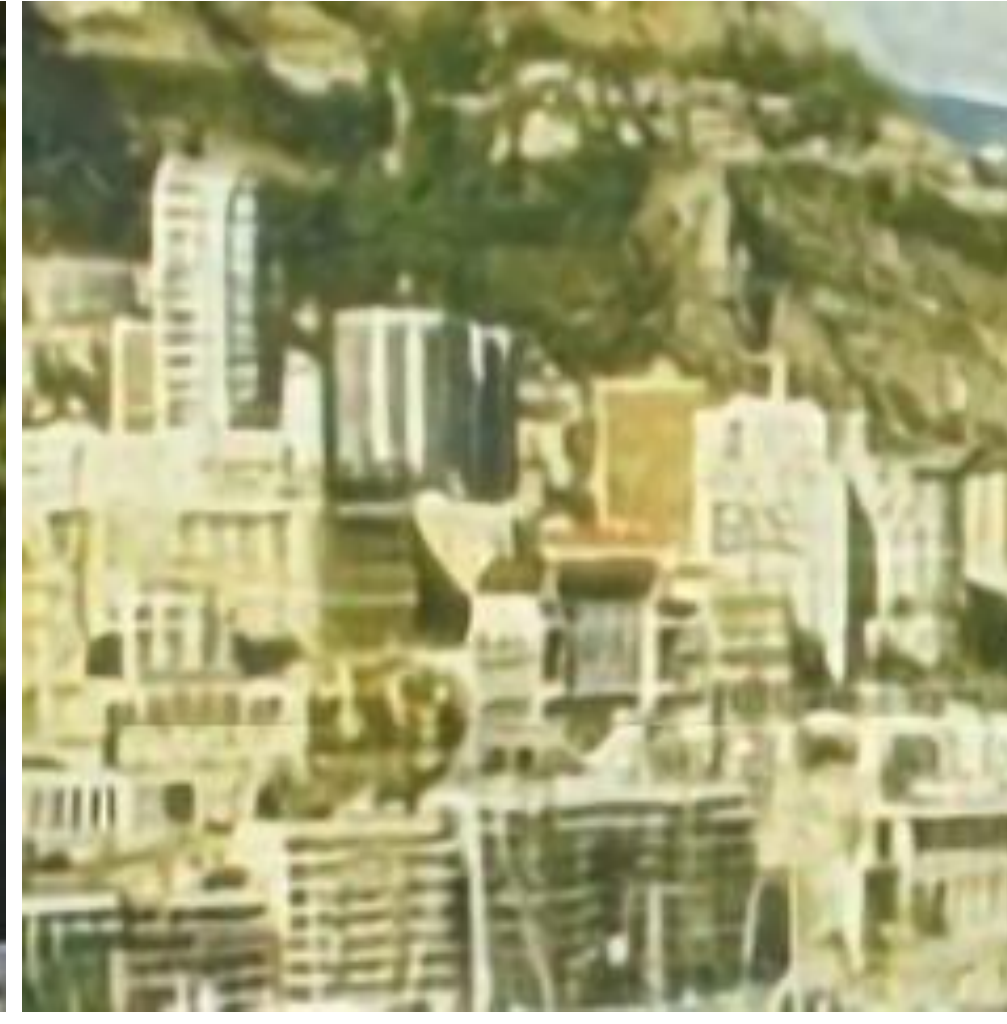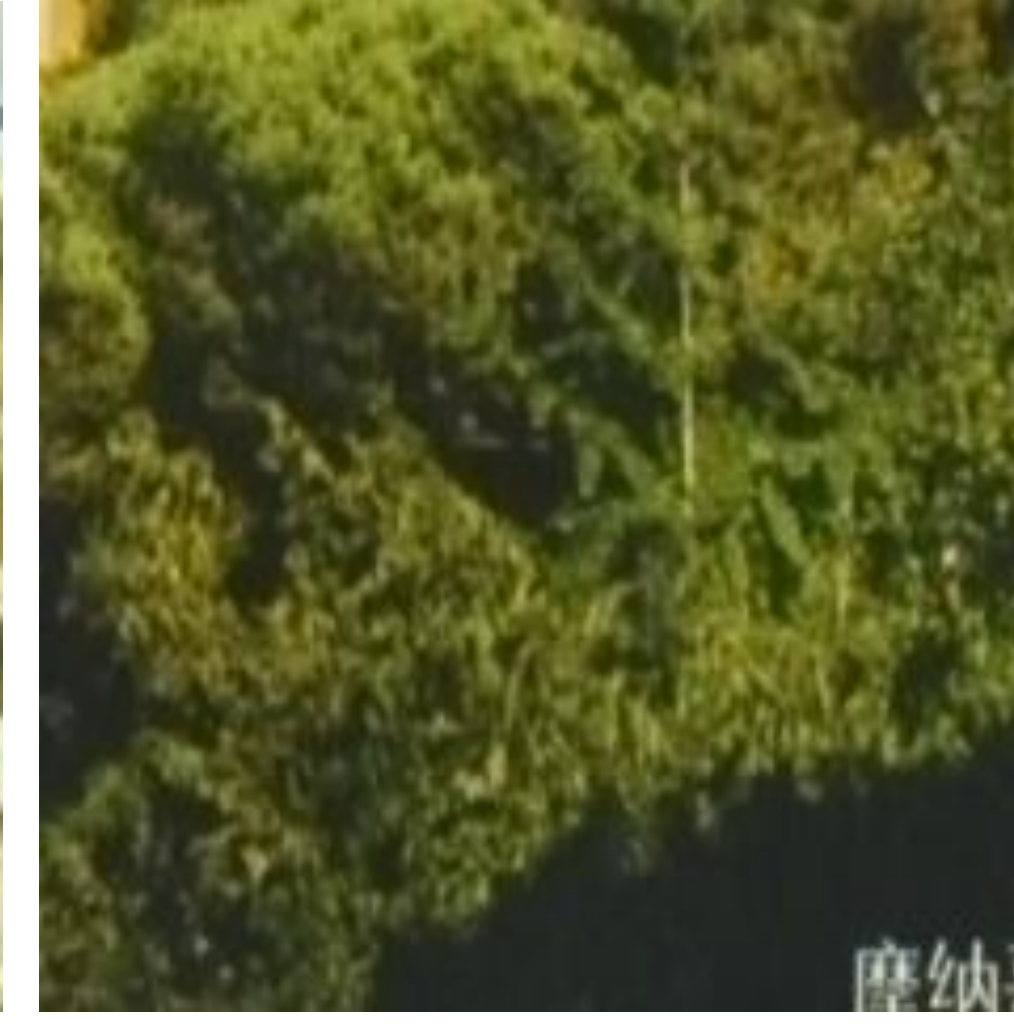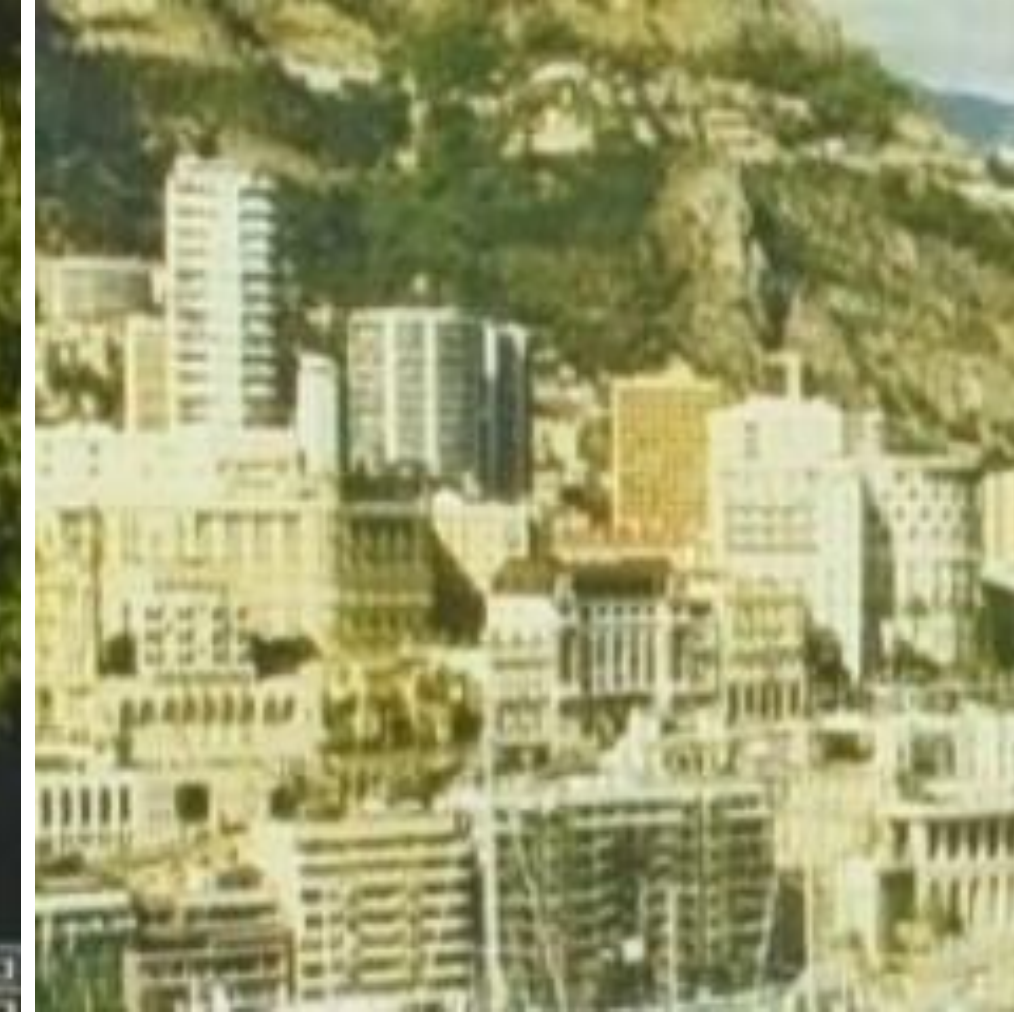

Supplement: Supplementary file 12 [file Guo_Low-light_Color_Imaging_ACCV_2020_supplemental.zip]

(a) Dual input pair

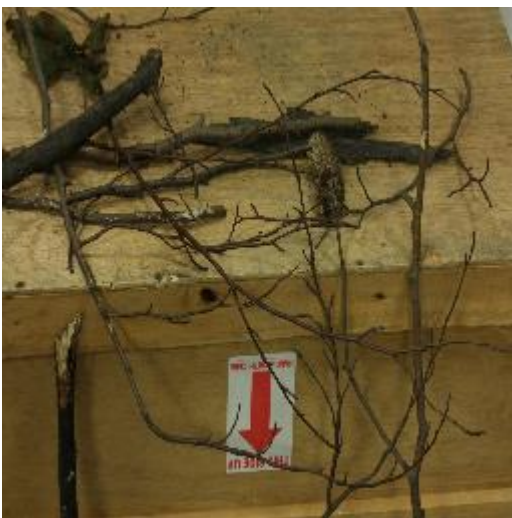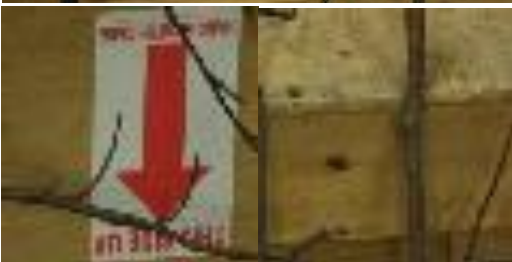

(b) PM

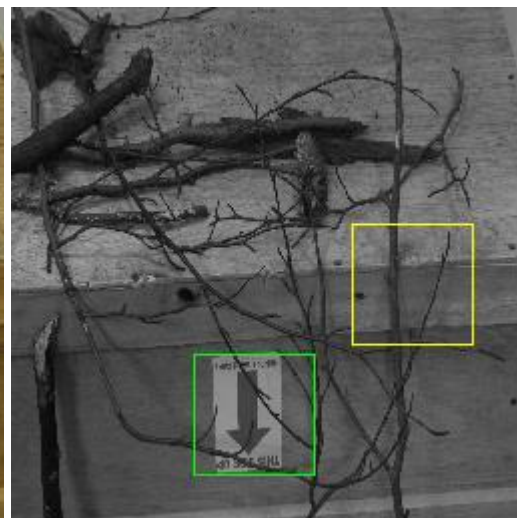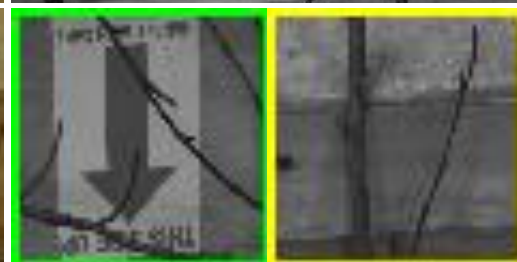

(c) ICIA

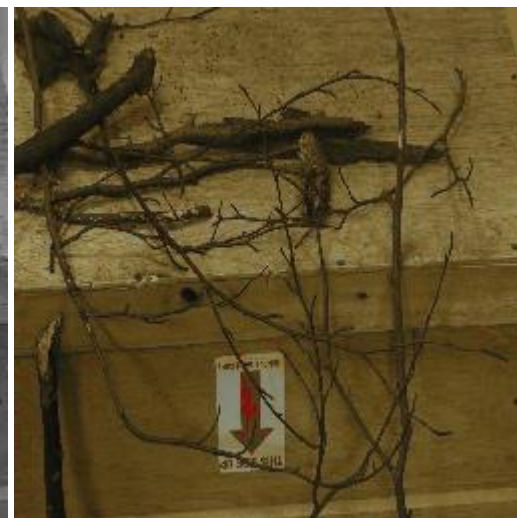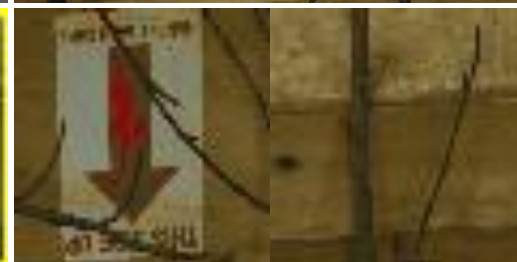

(d) DEC

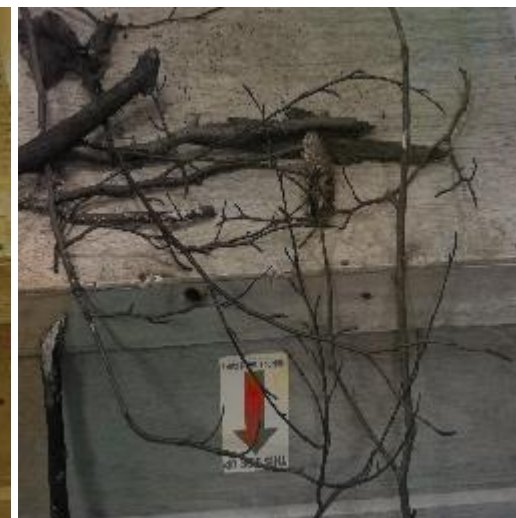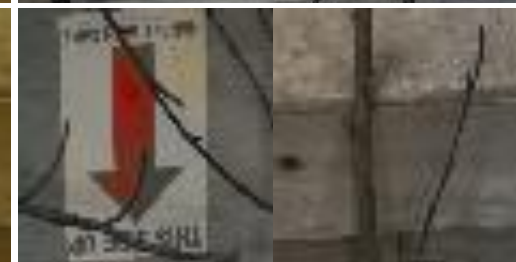

(e) Ours

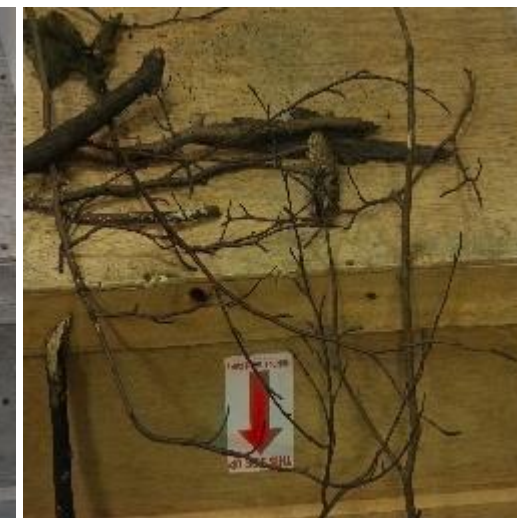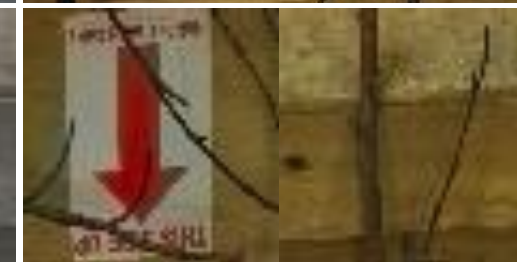

(f) GT

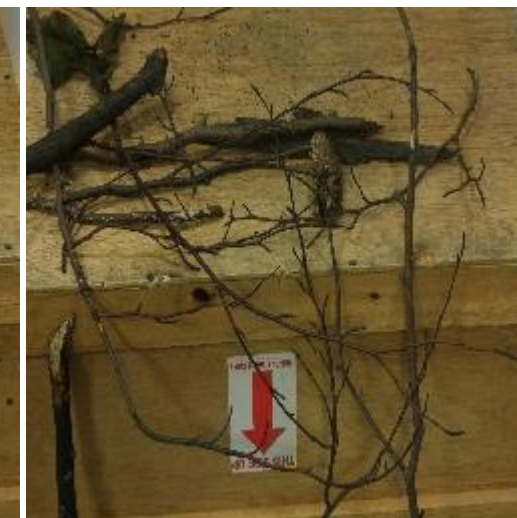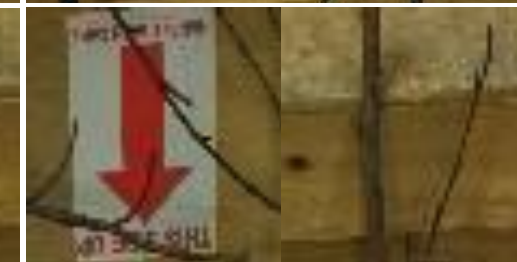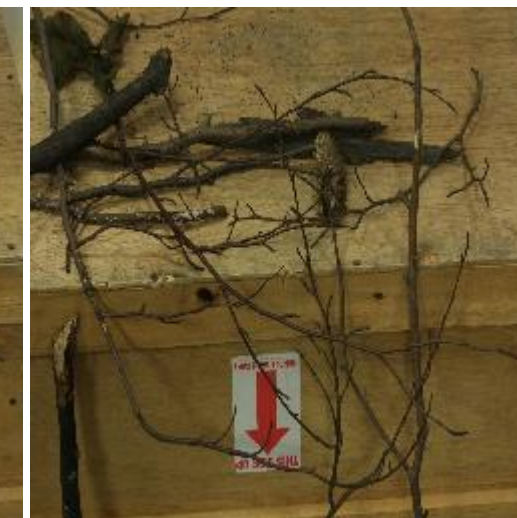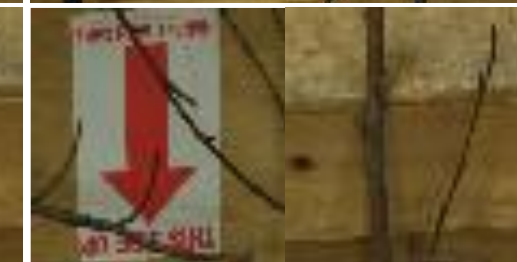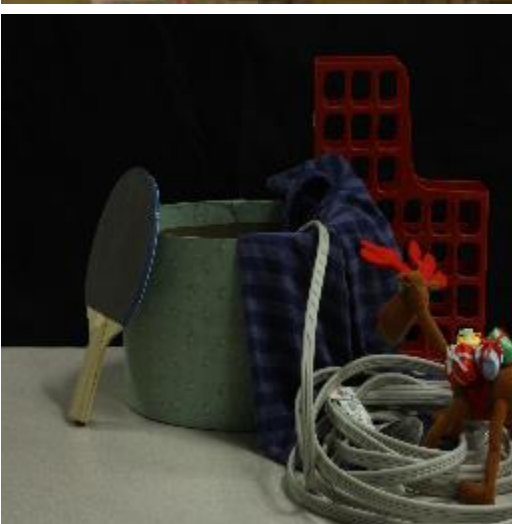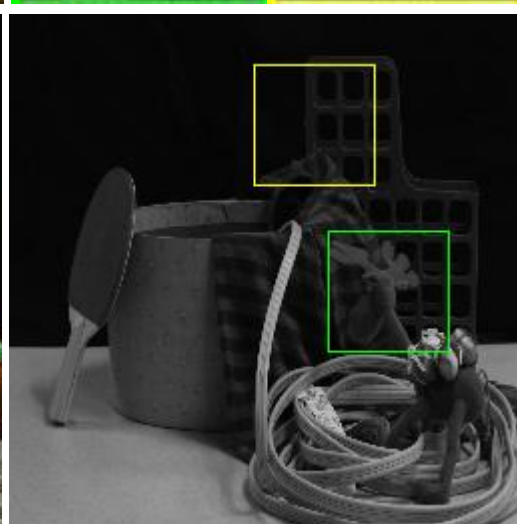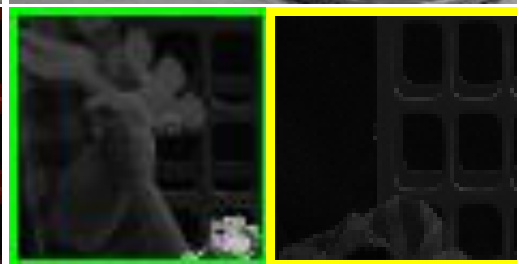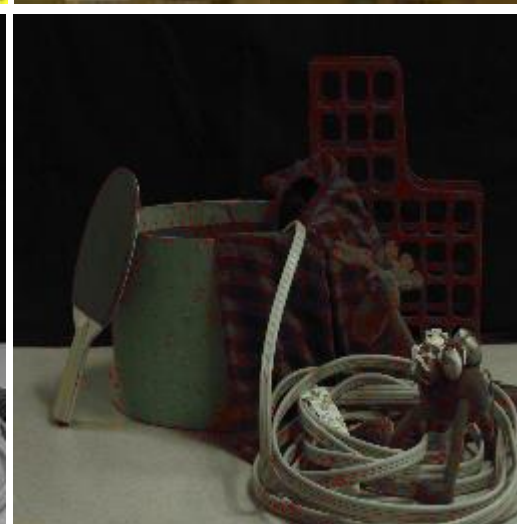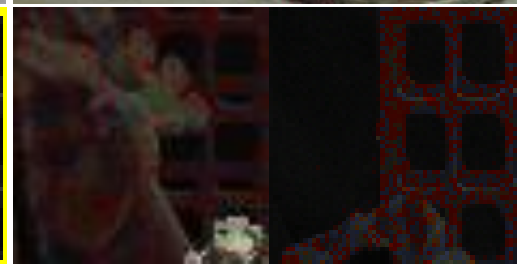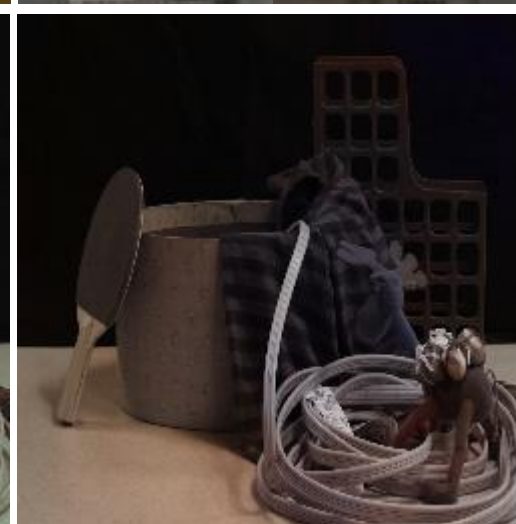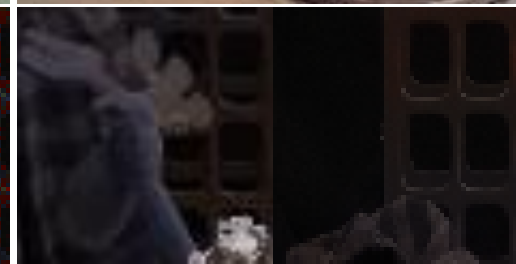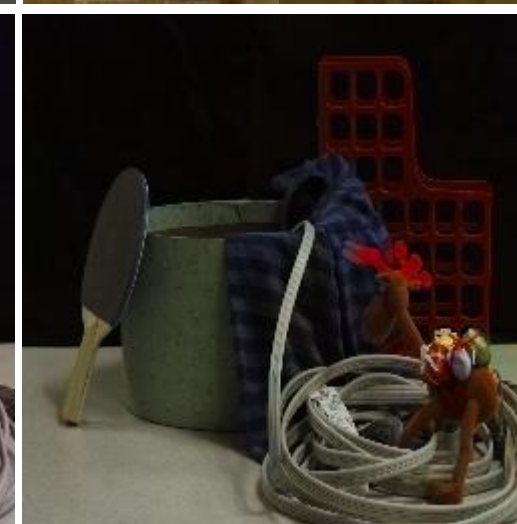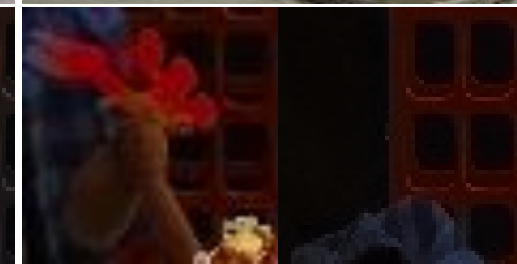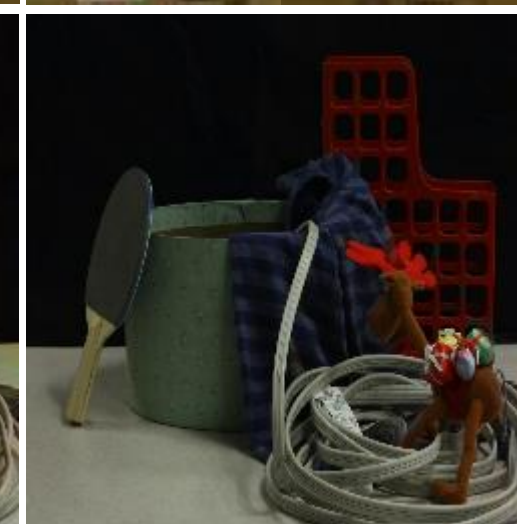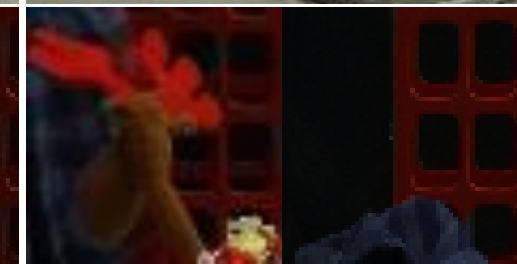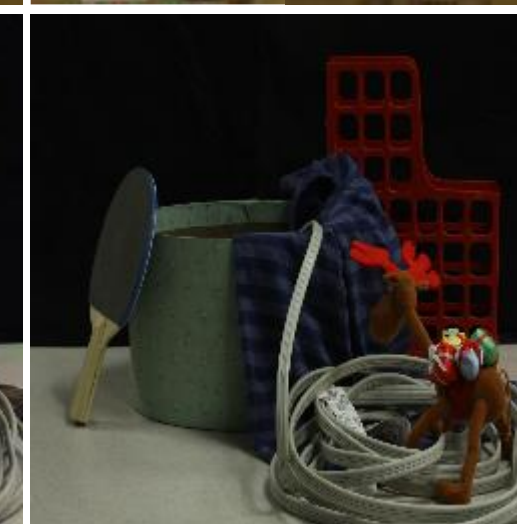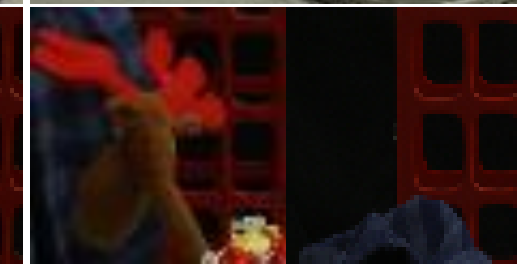

Supplement: Supplementary file 14 [file Guo_Low-light_Color_Imaging_ACCV_2020_supplemental.zip]

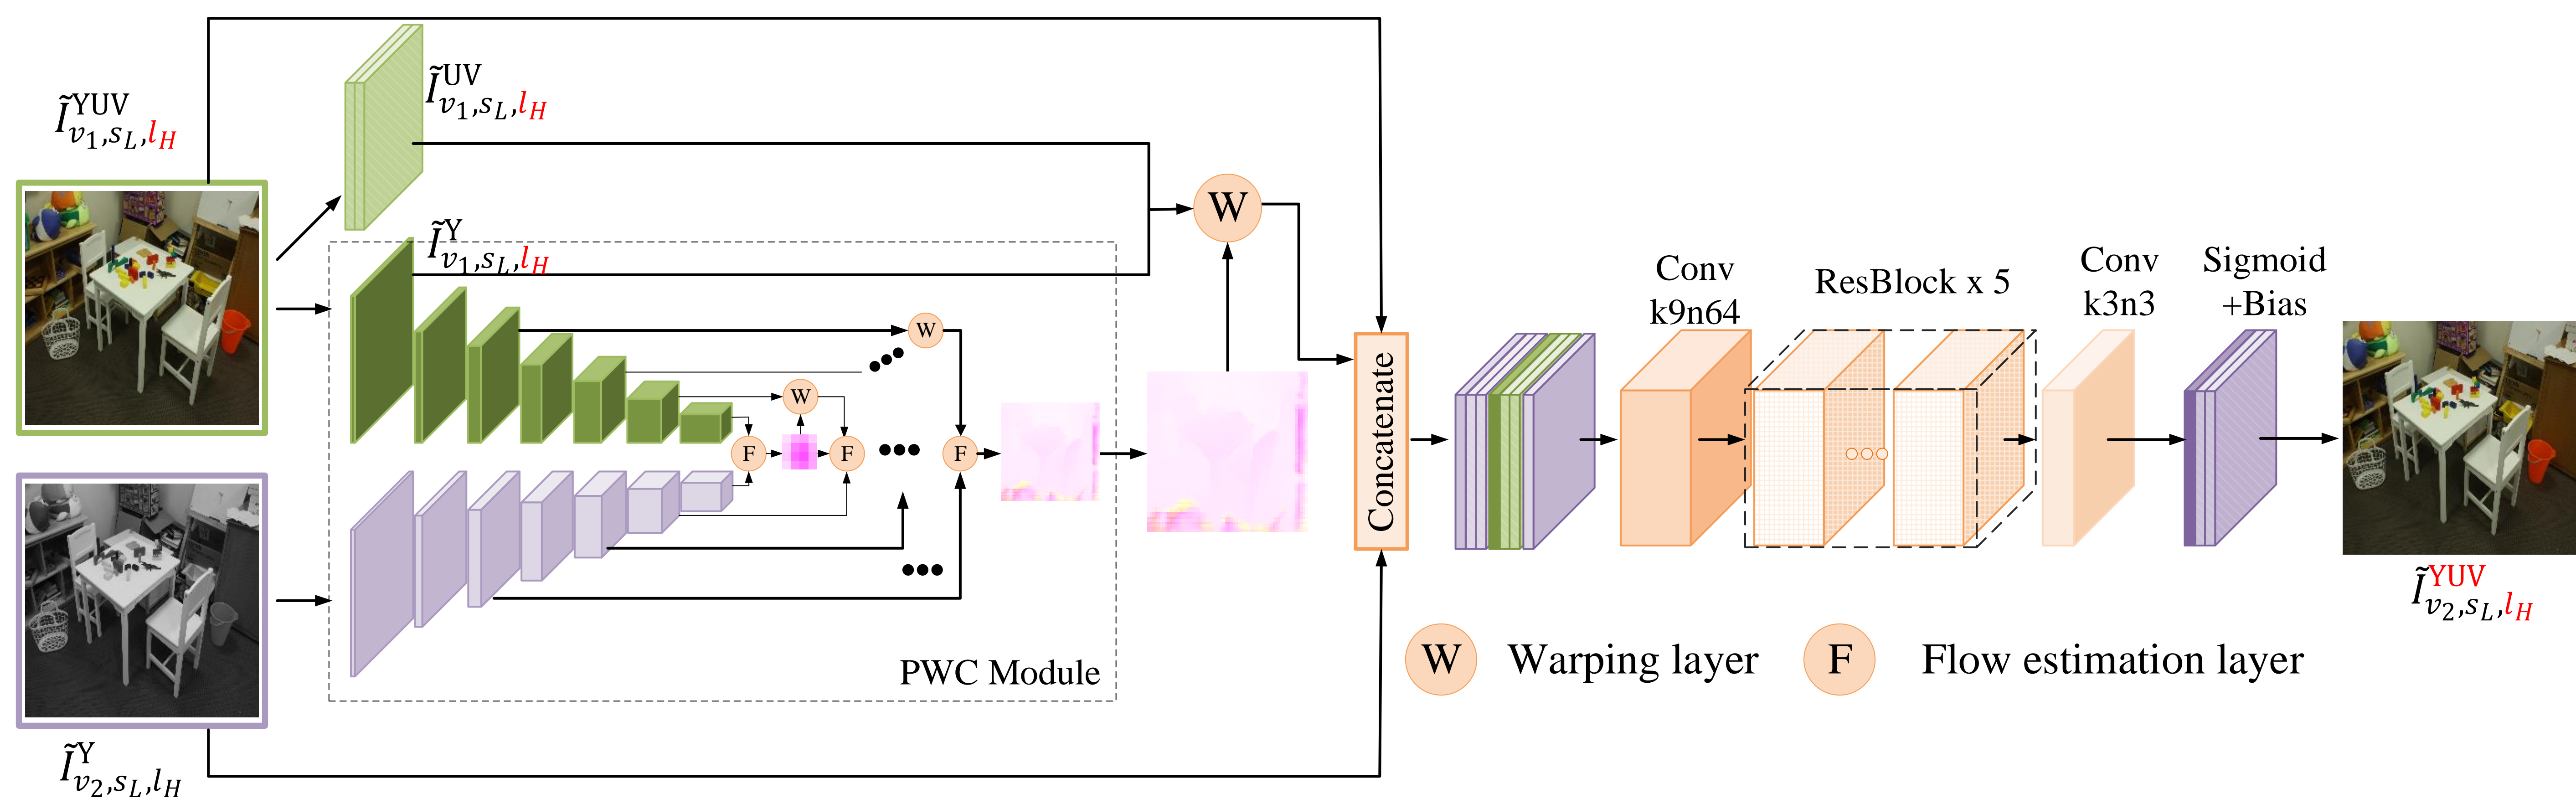

Supplement: Supplementary file 15 [file Guo_Low-light_Color_Imaging_ACCV_2020_supplemental.zip]

(a)

(b)

(c)

(d)

(e)

(f)

(g)

(h)

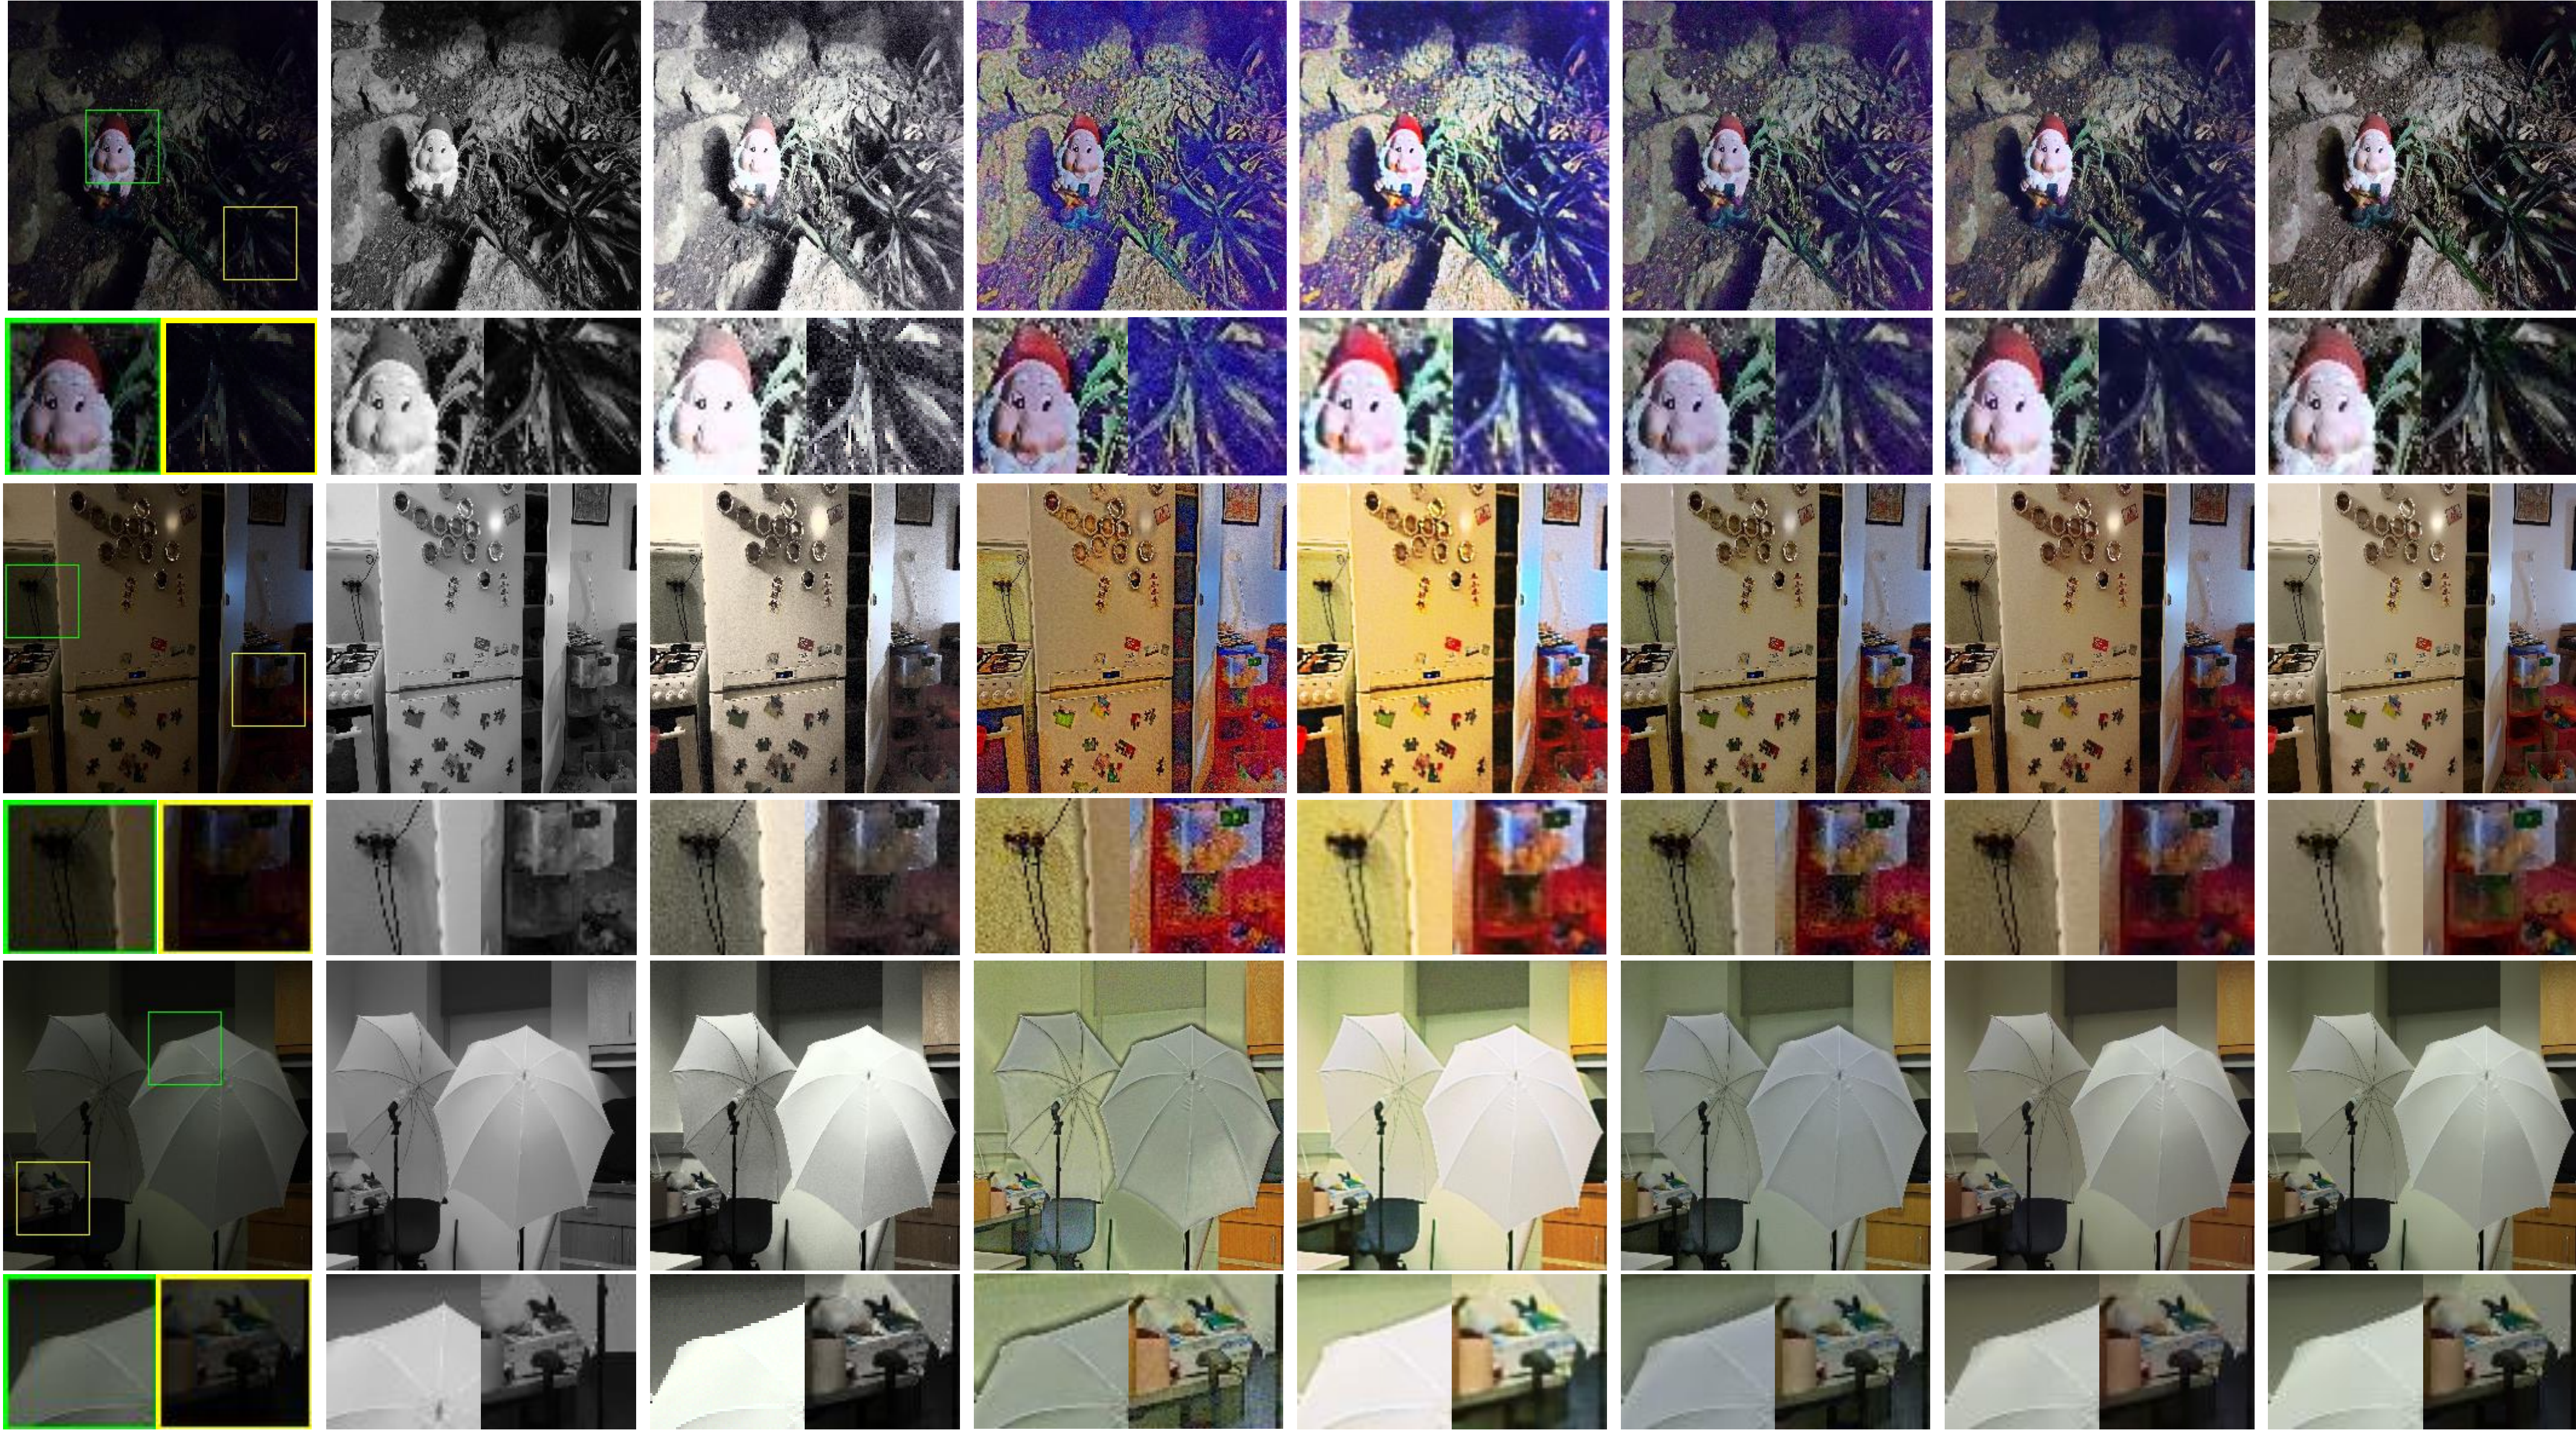

Supplement: Supplementary file 17 [file Guo_Low-light_Color_Imaging_ACCV_2020_supplemental.zip]

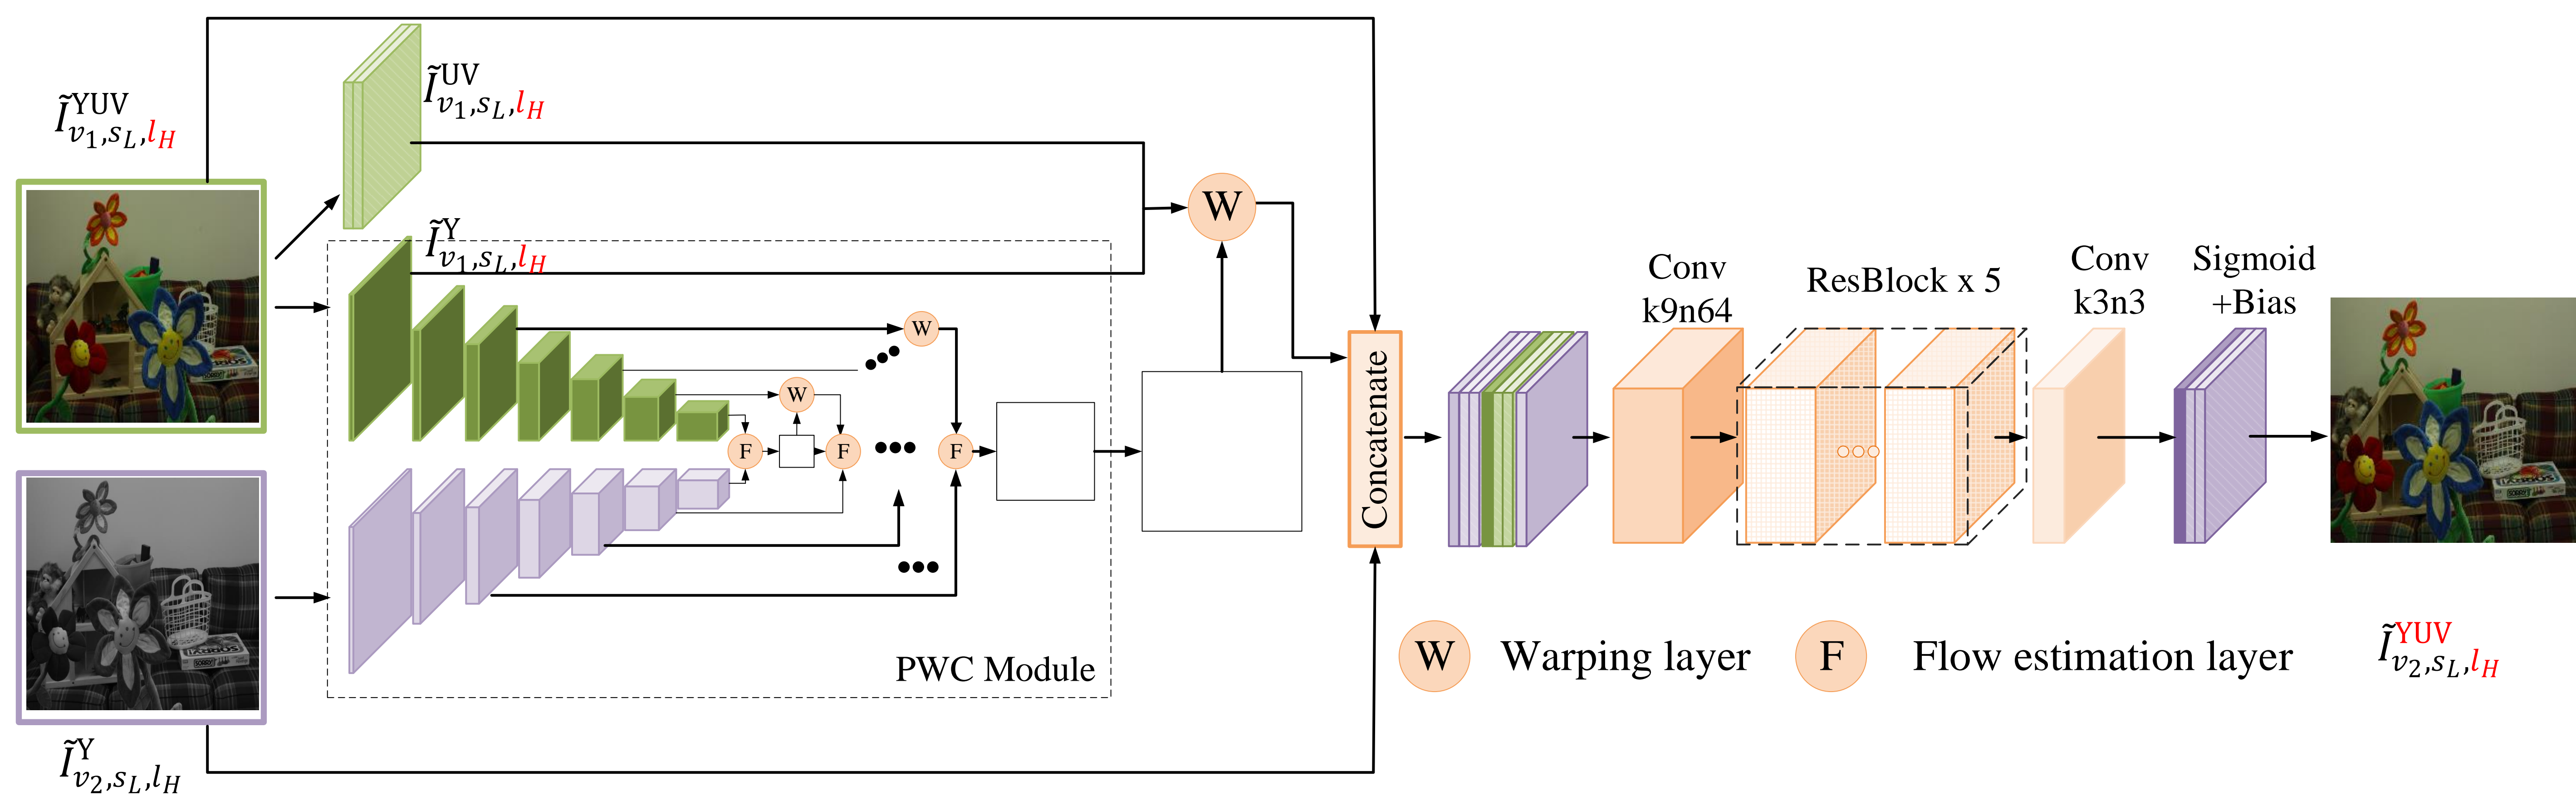

Supplement: Supplementary file 18 [file Guo_Low-light_Color_Imaging_ACCV_2020_supplemental.zip]

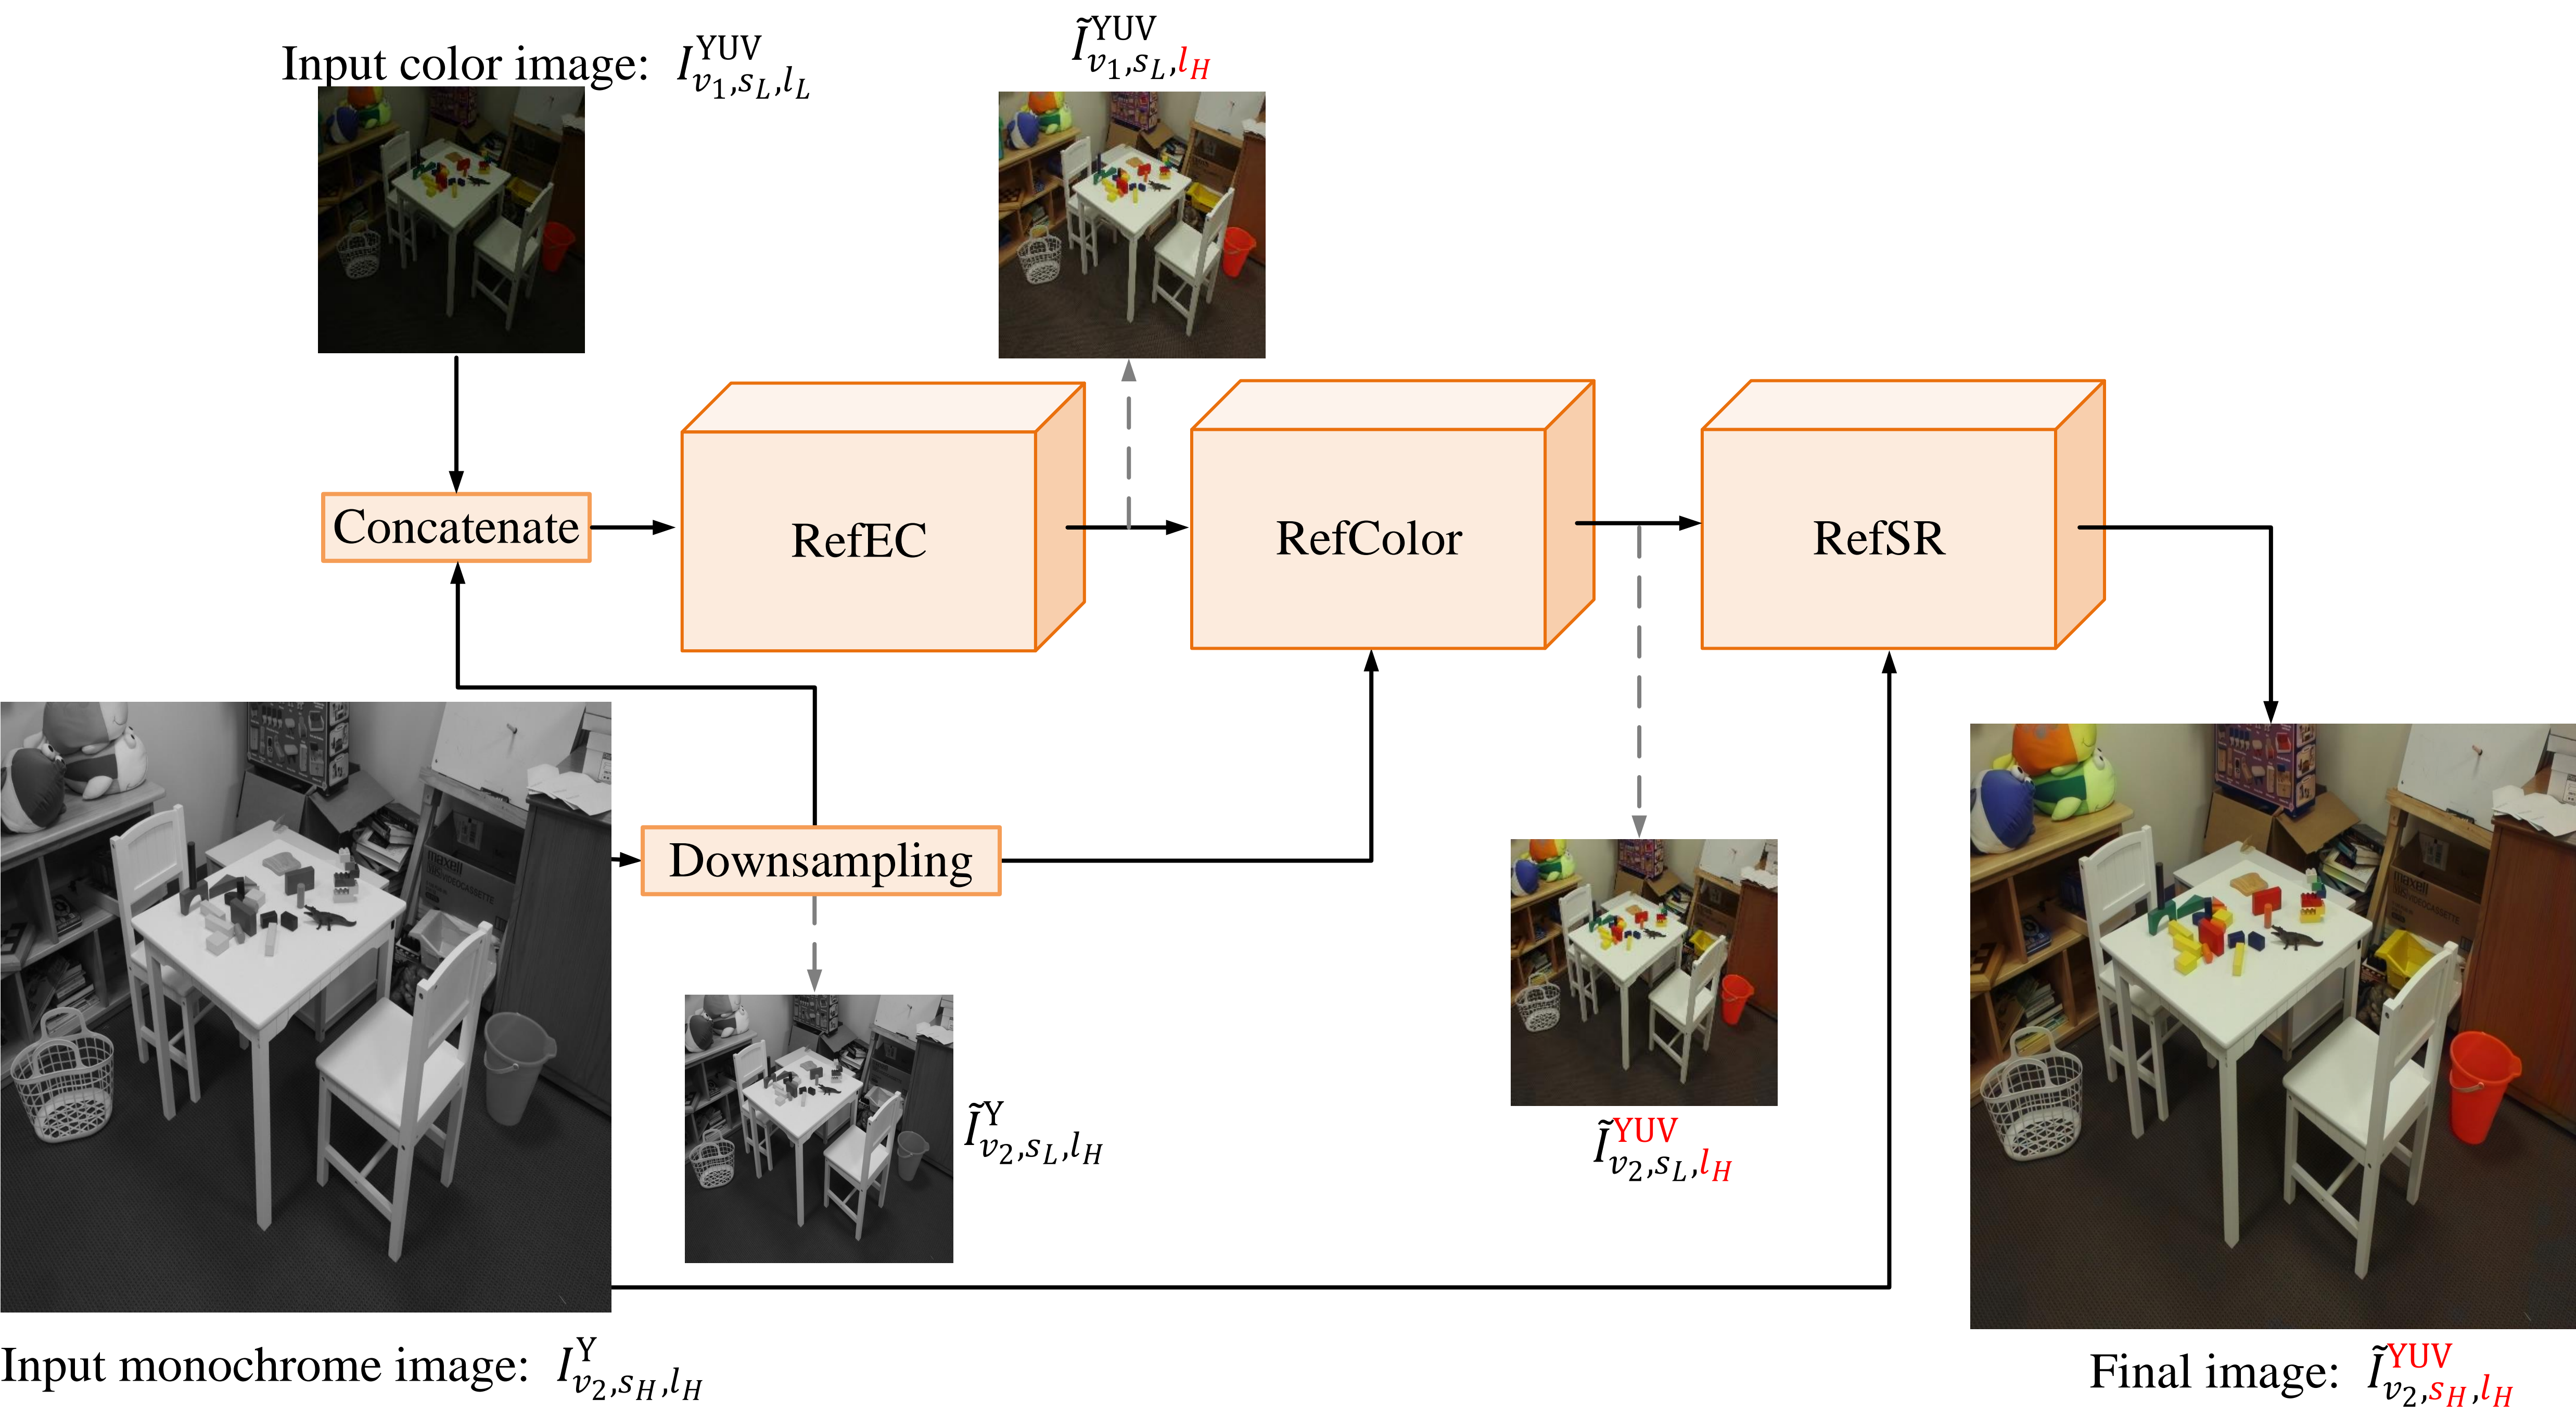

Supplement: Supplementary file 19 [file Guo_Low-light_Color_Imaging_ACCV_2020_supplemental.zip]

(a)

(b)

(c)

(d)

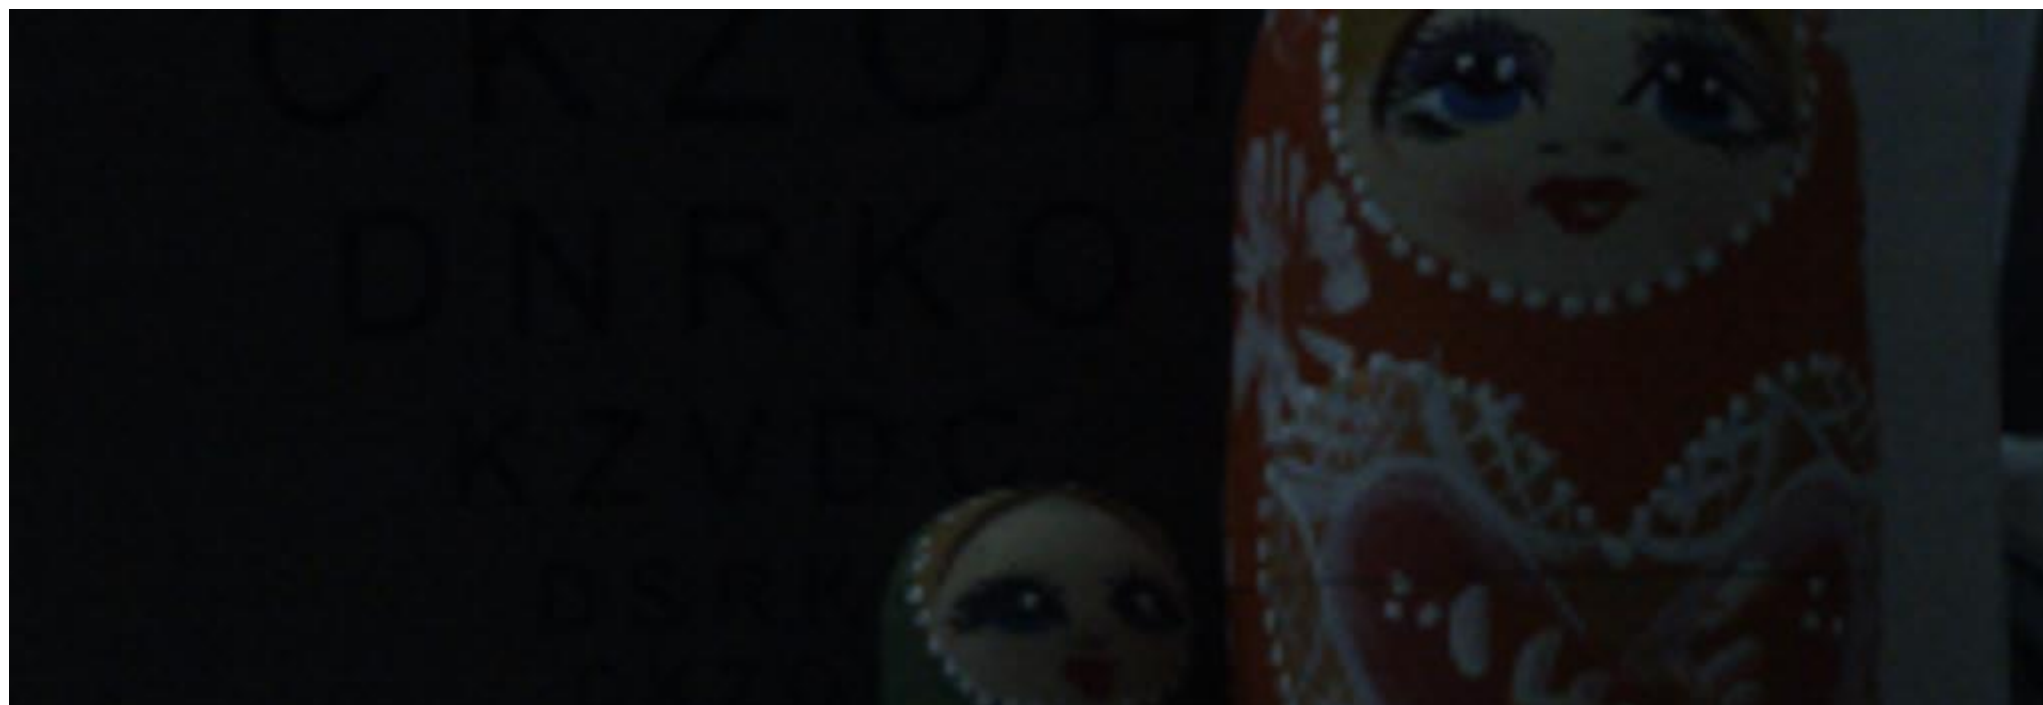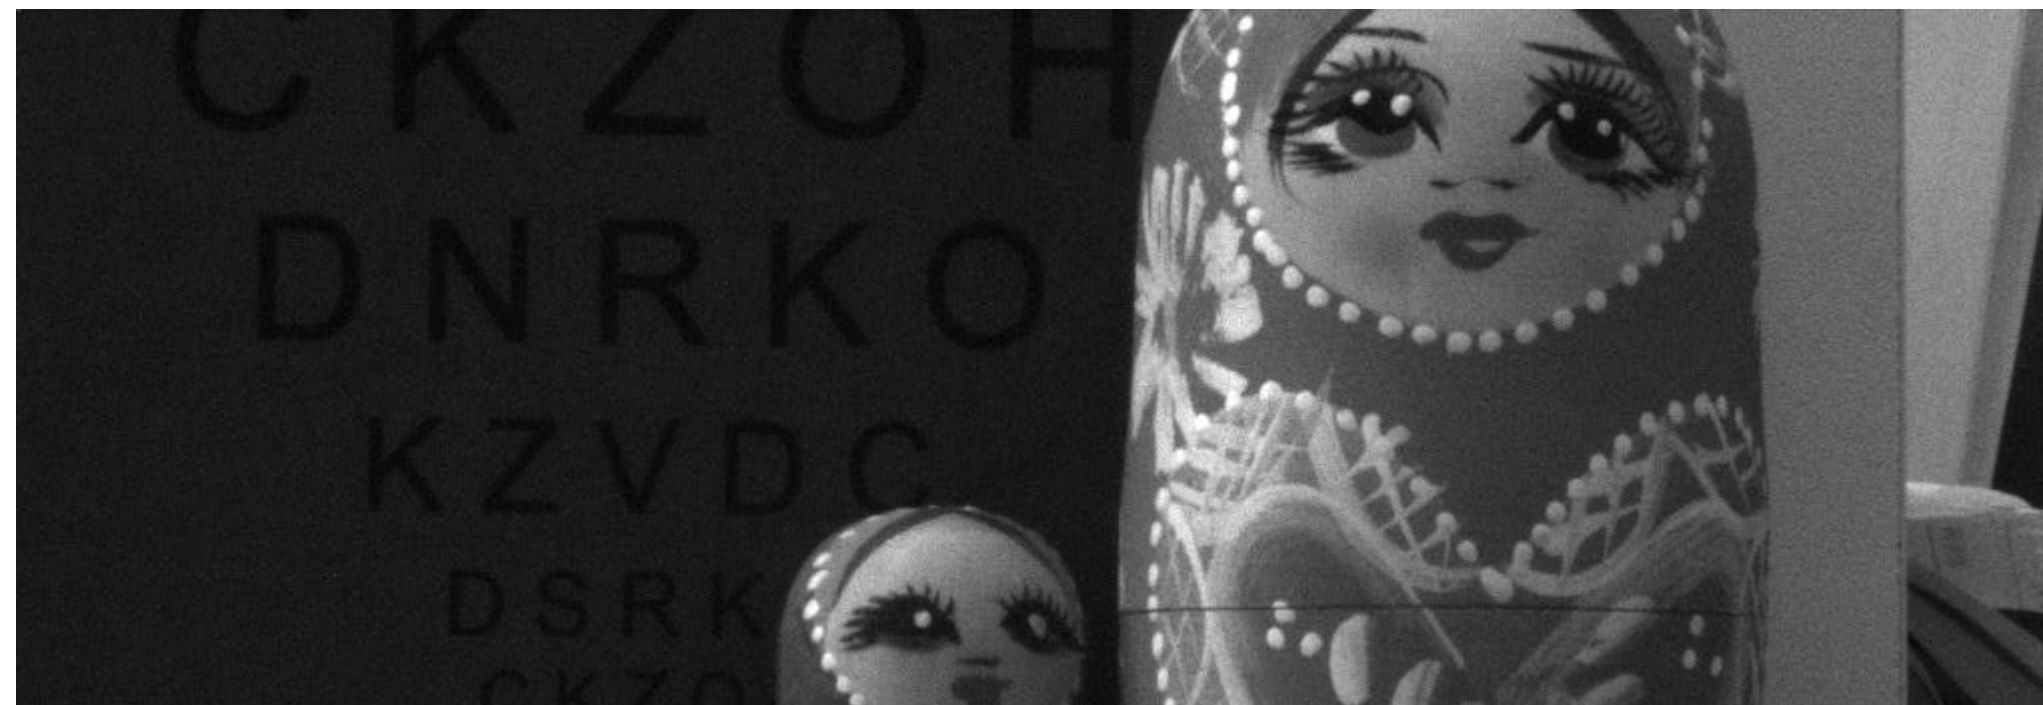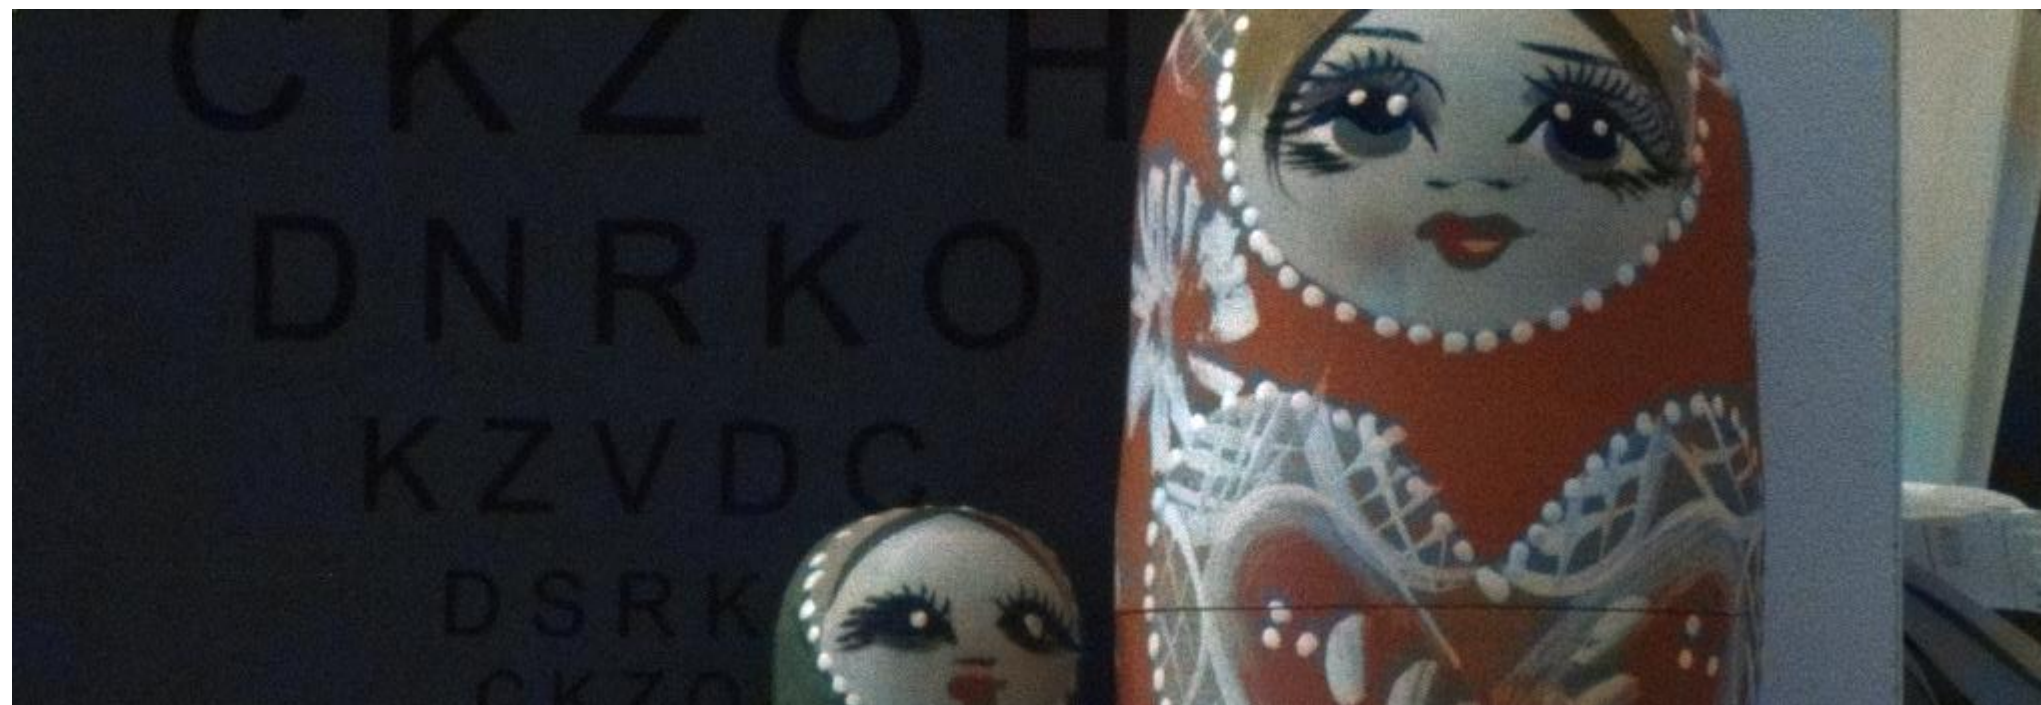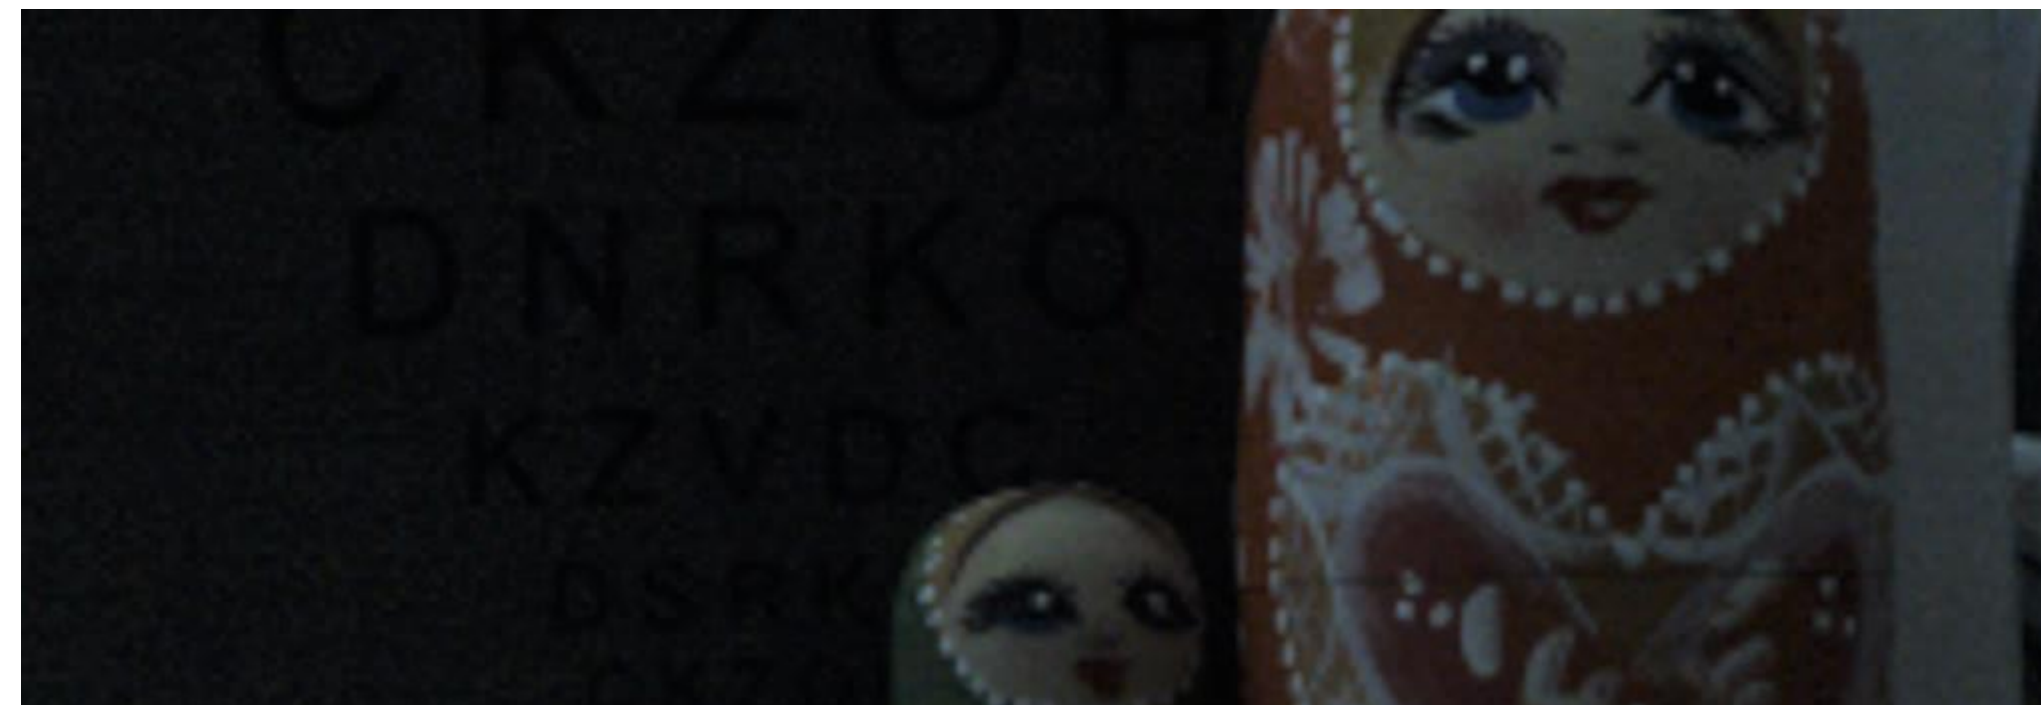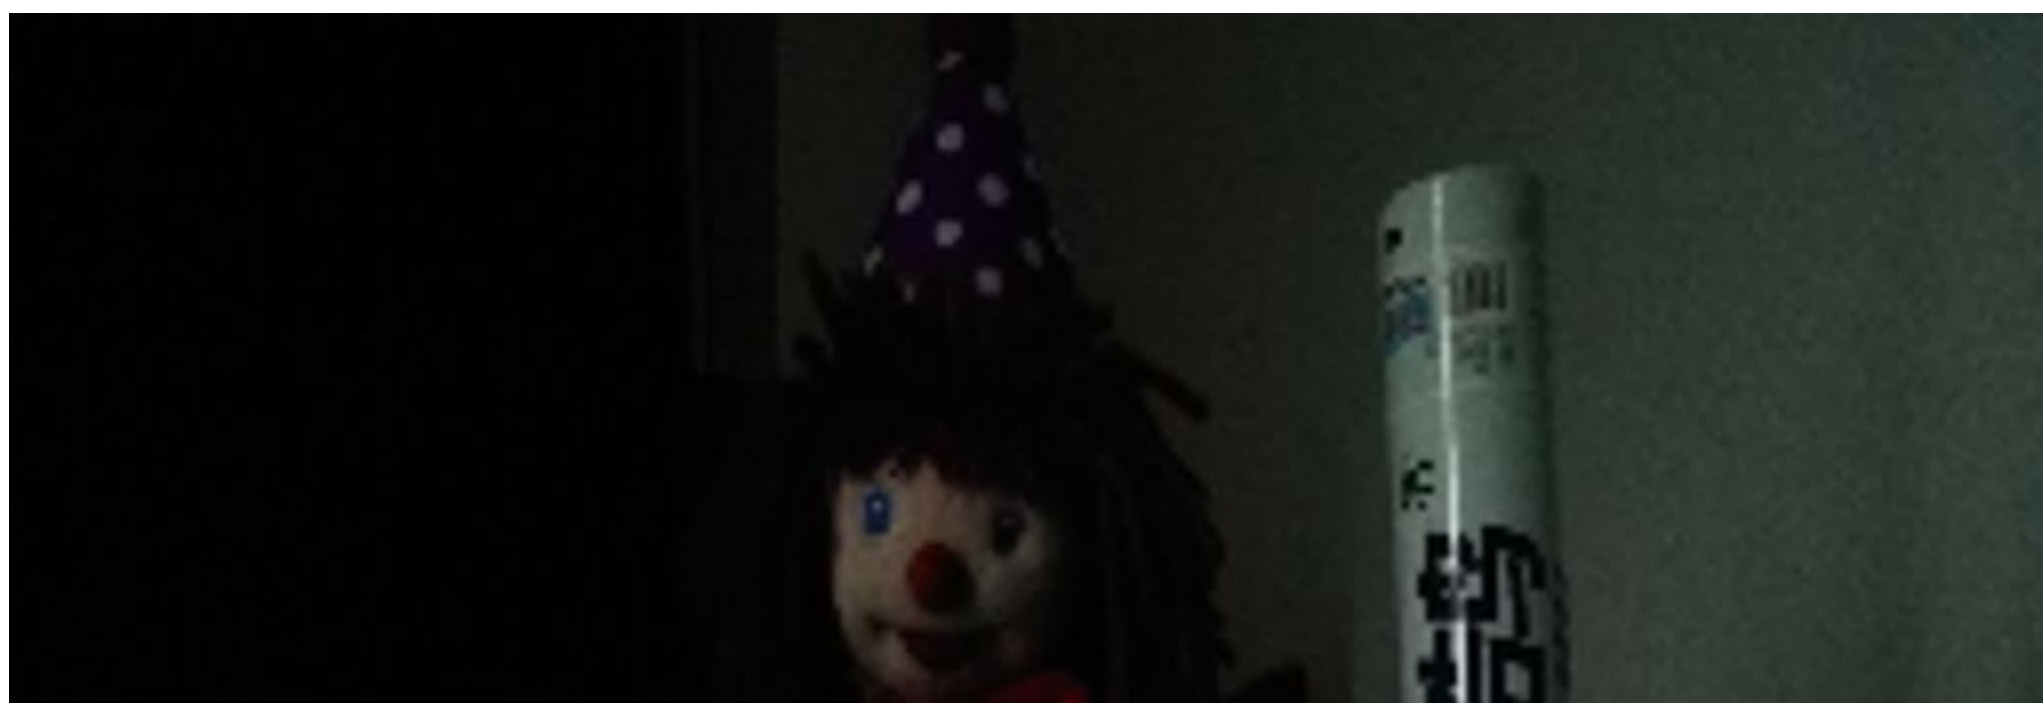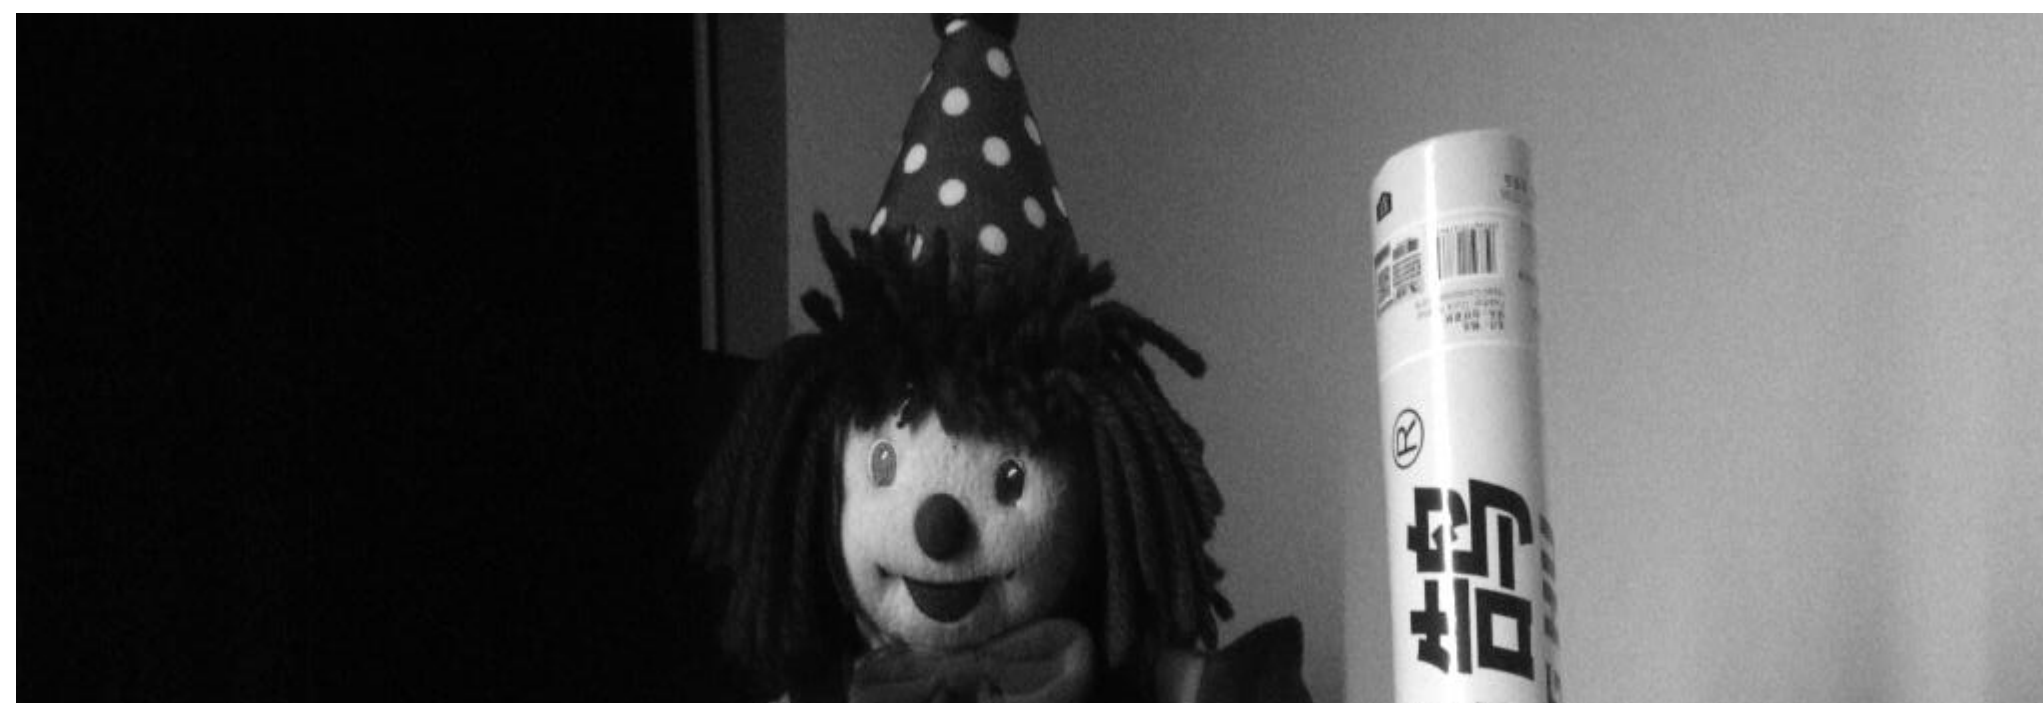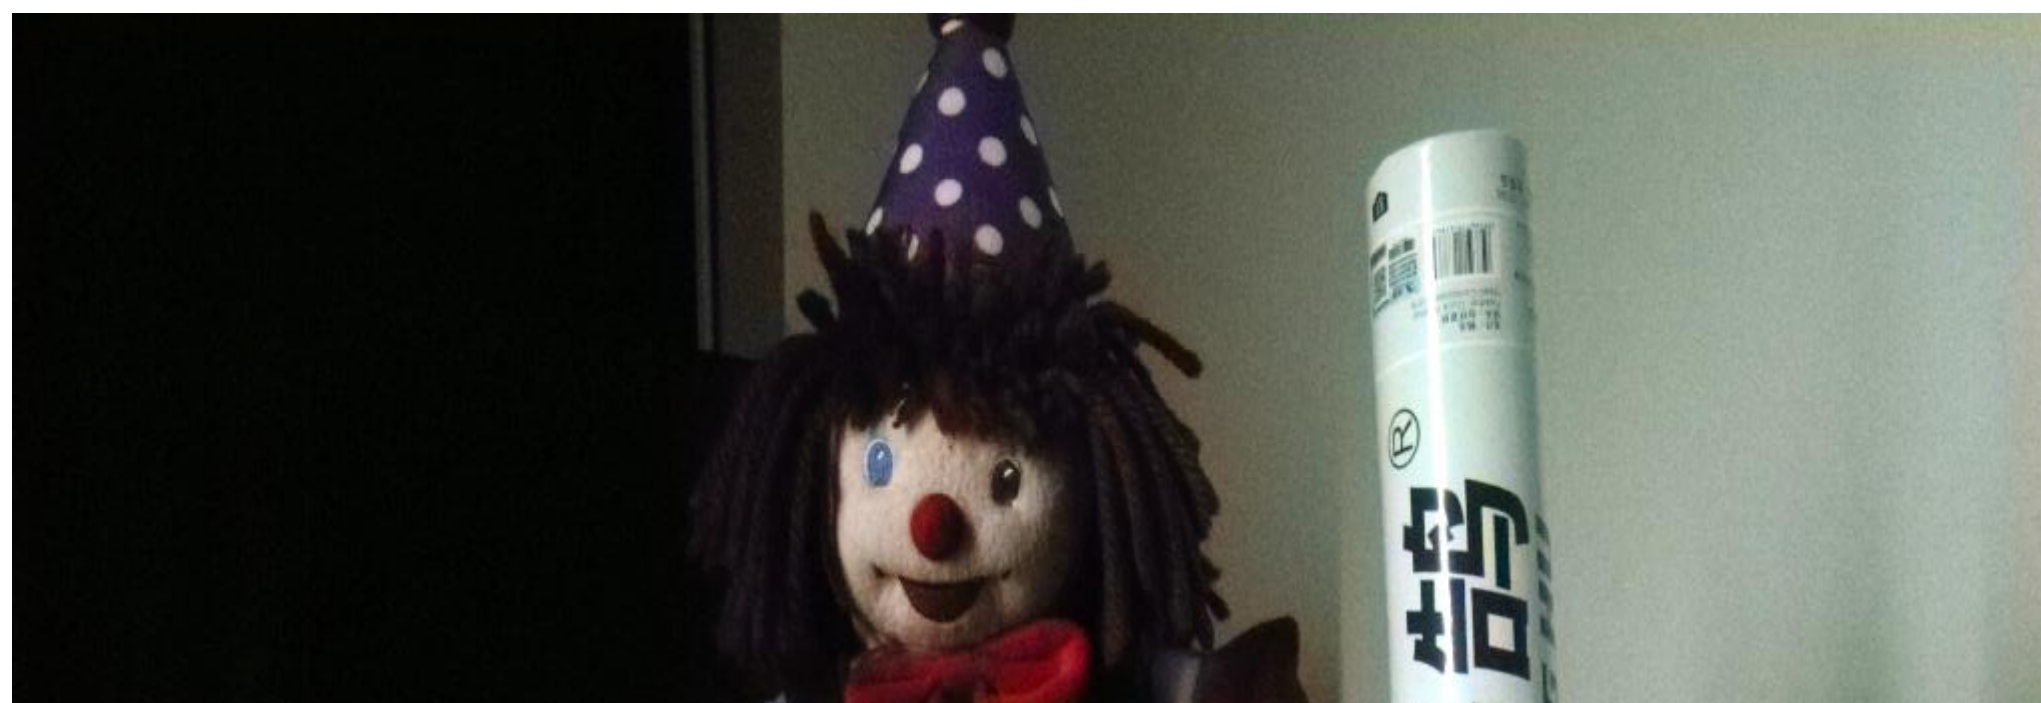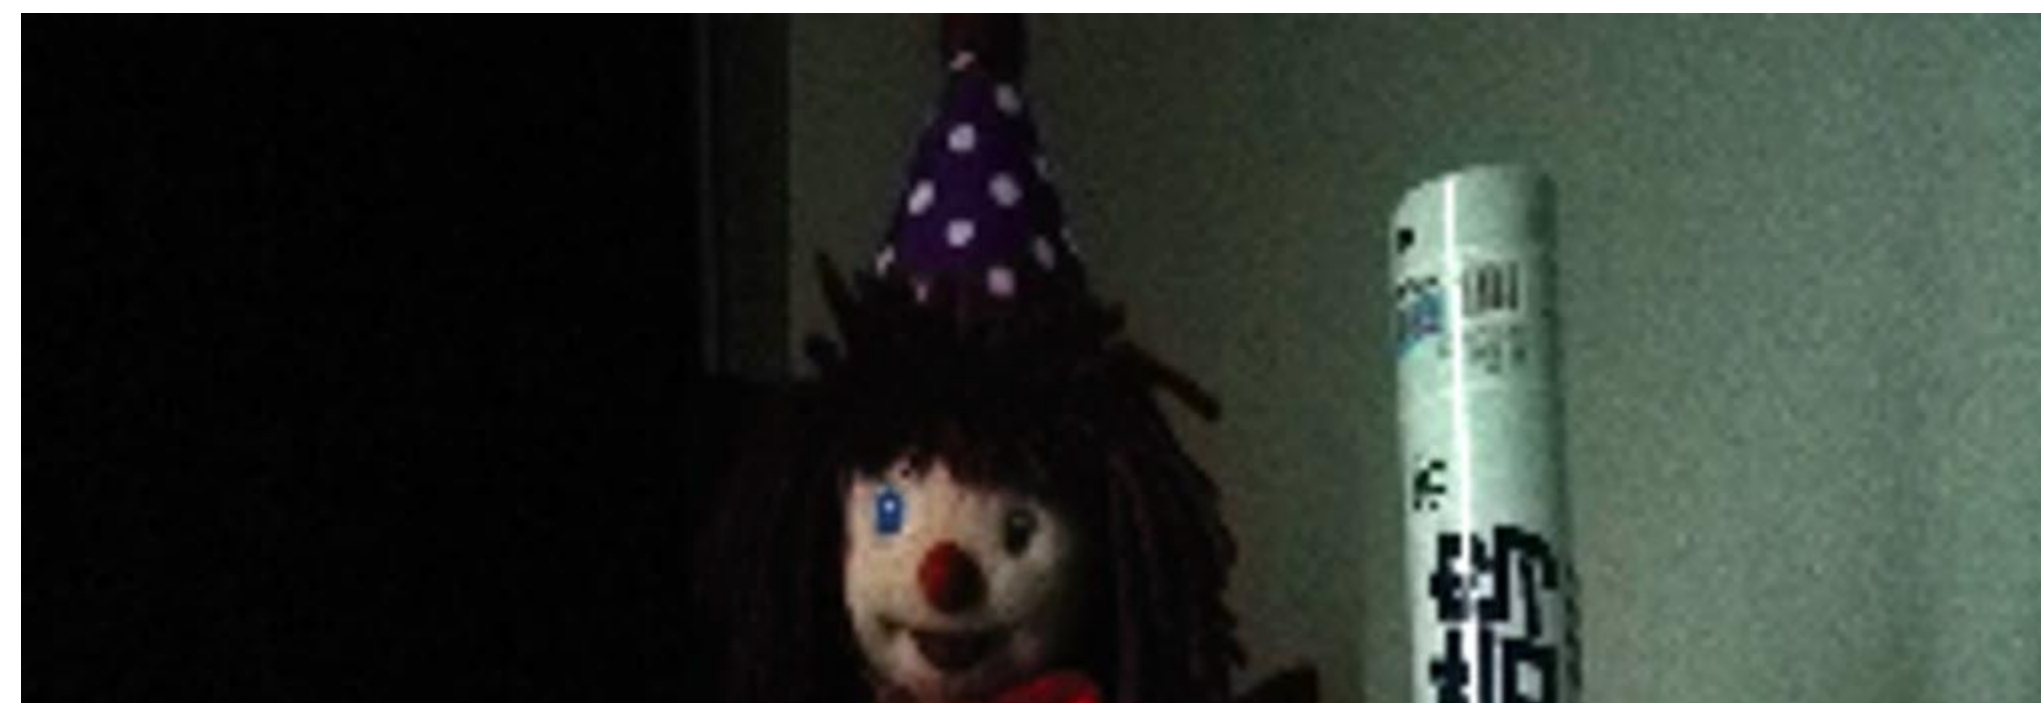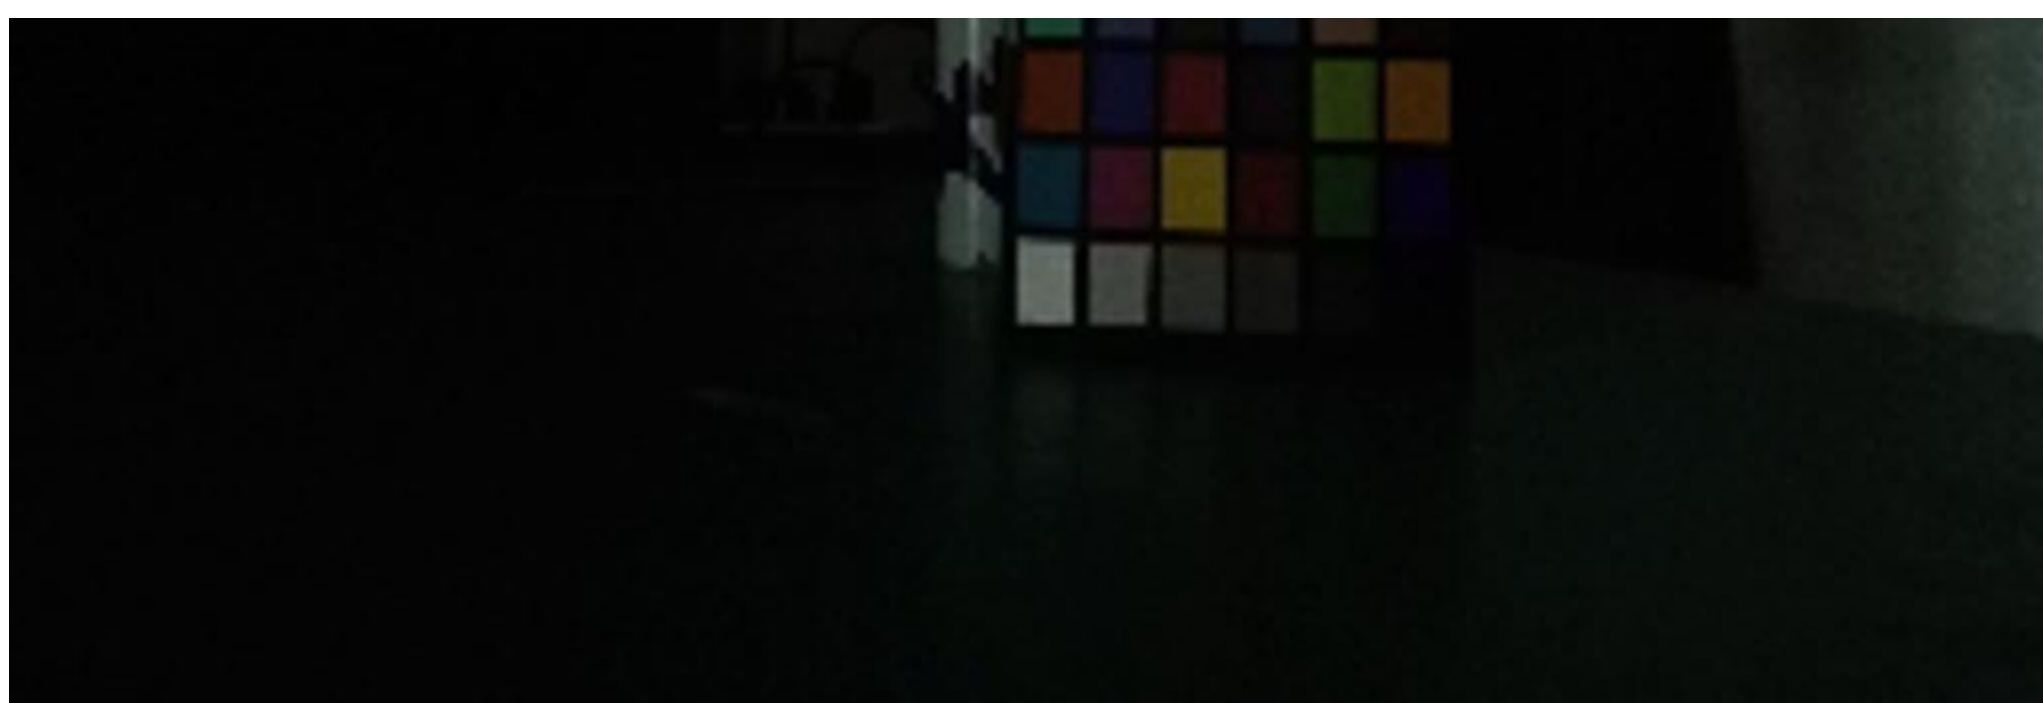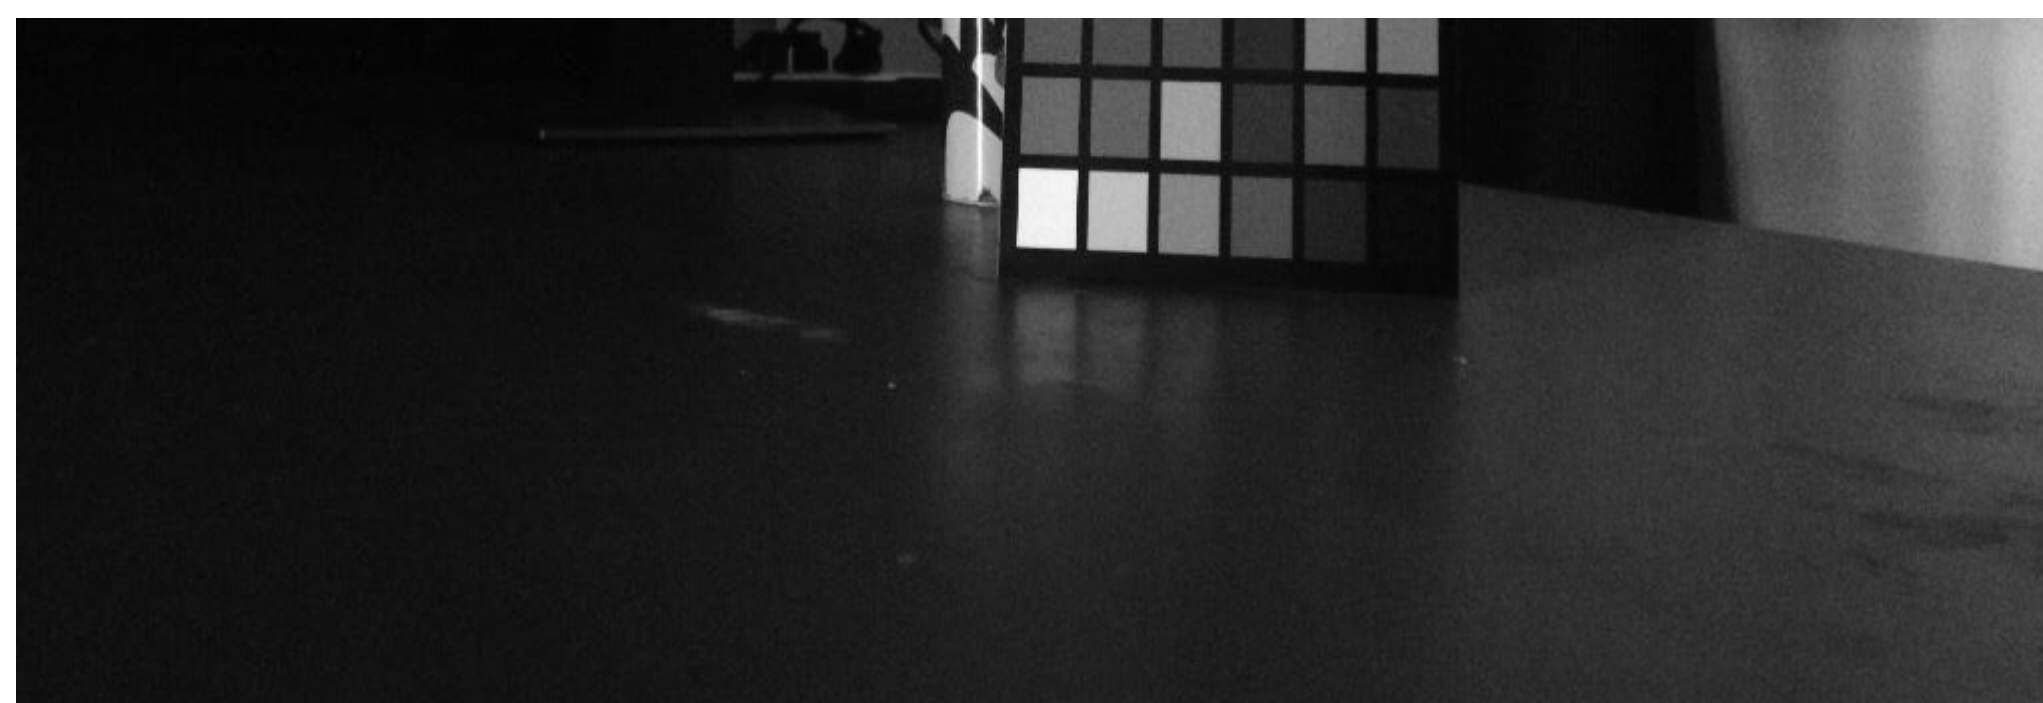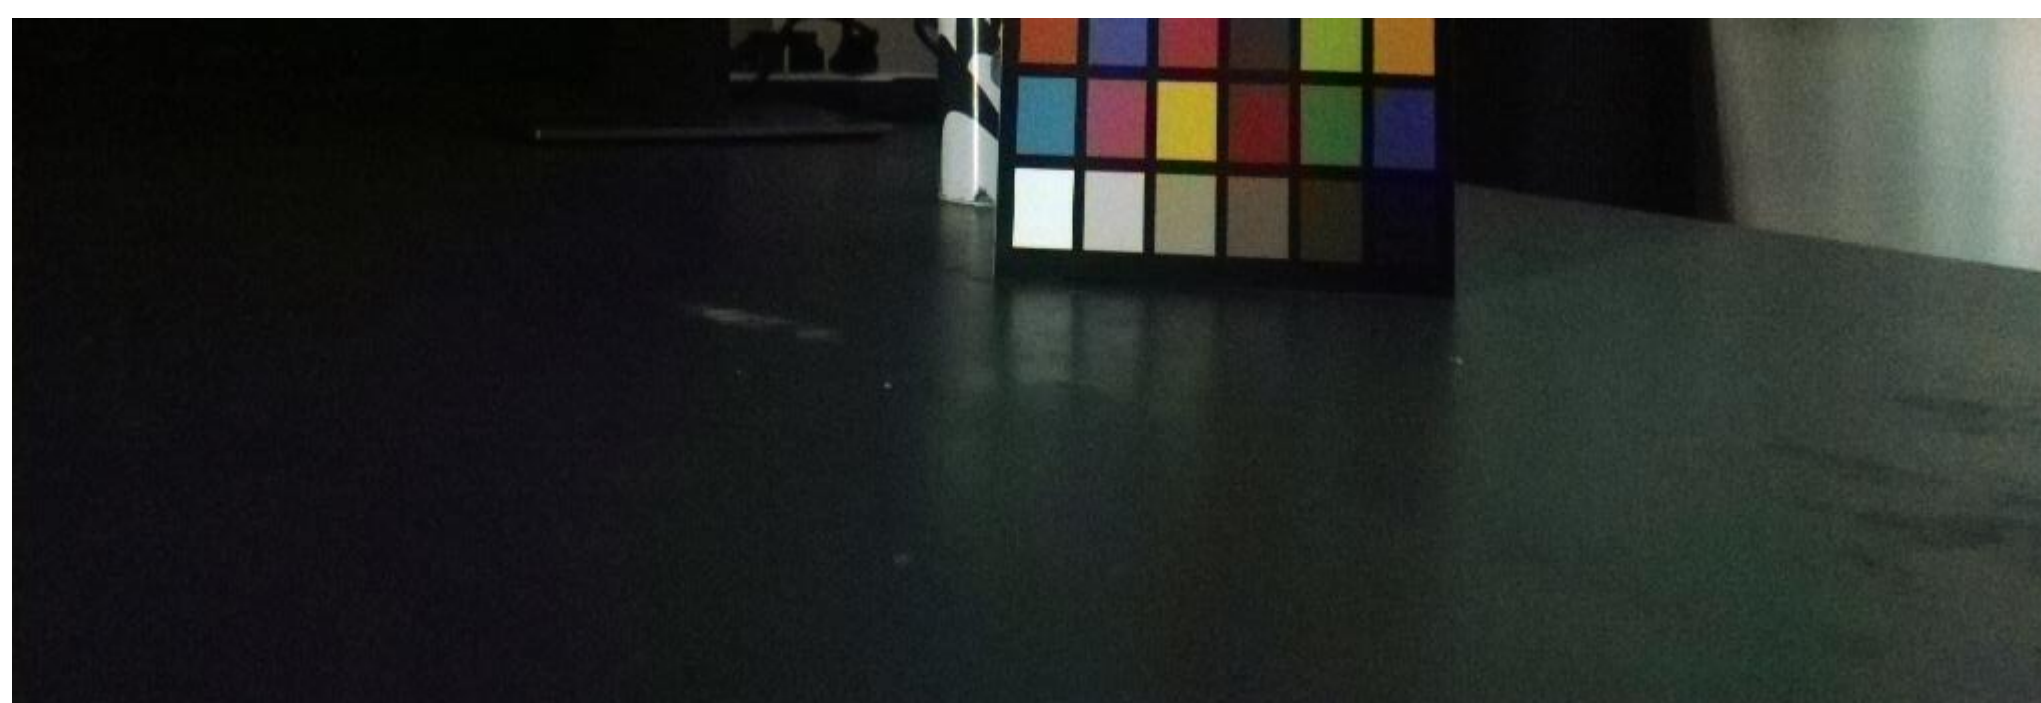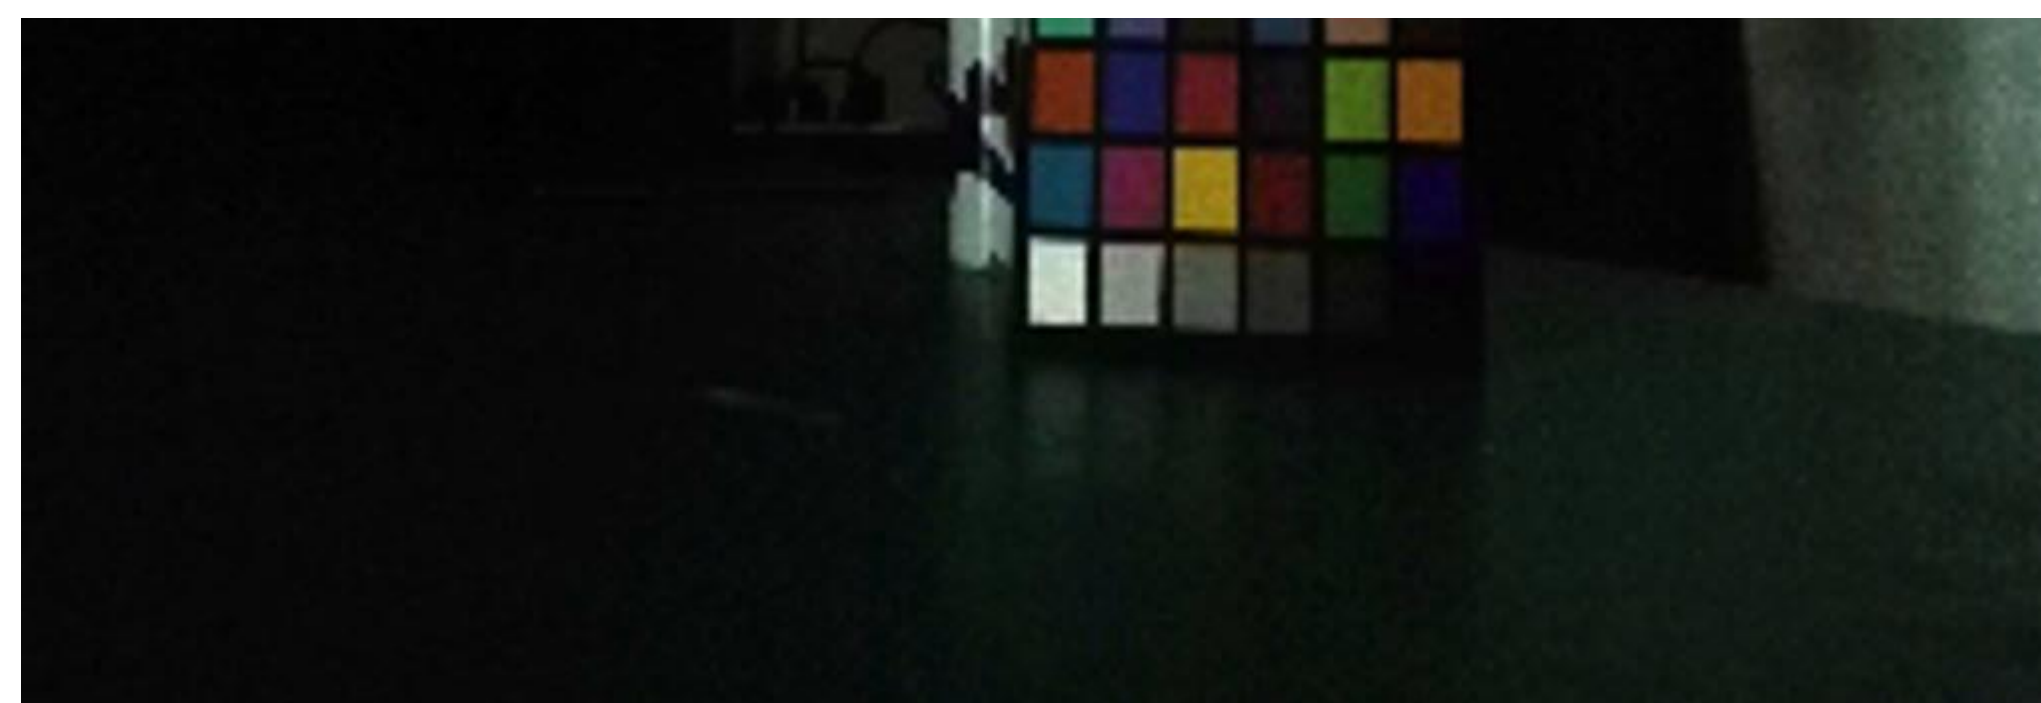

Supplement: Supplementary file 20 [file Guo_Low-light_Color_Imaging_ACCV_2020_supplemental.zip]

(a)

(b)

(c)

(d)

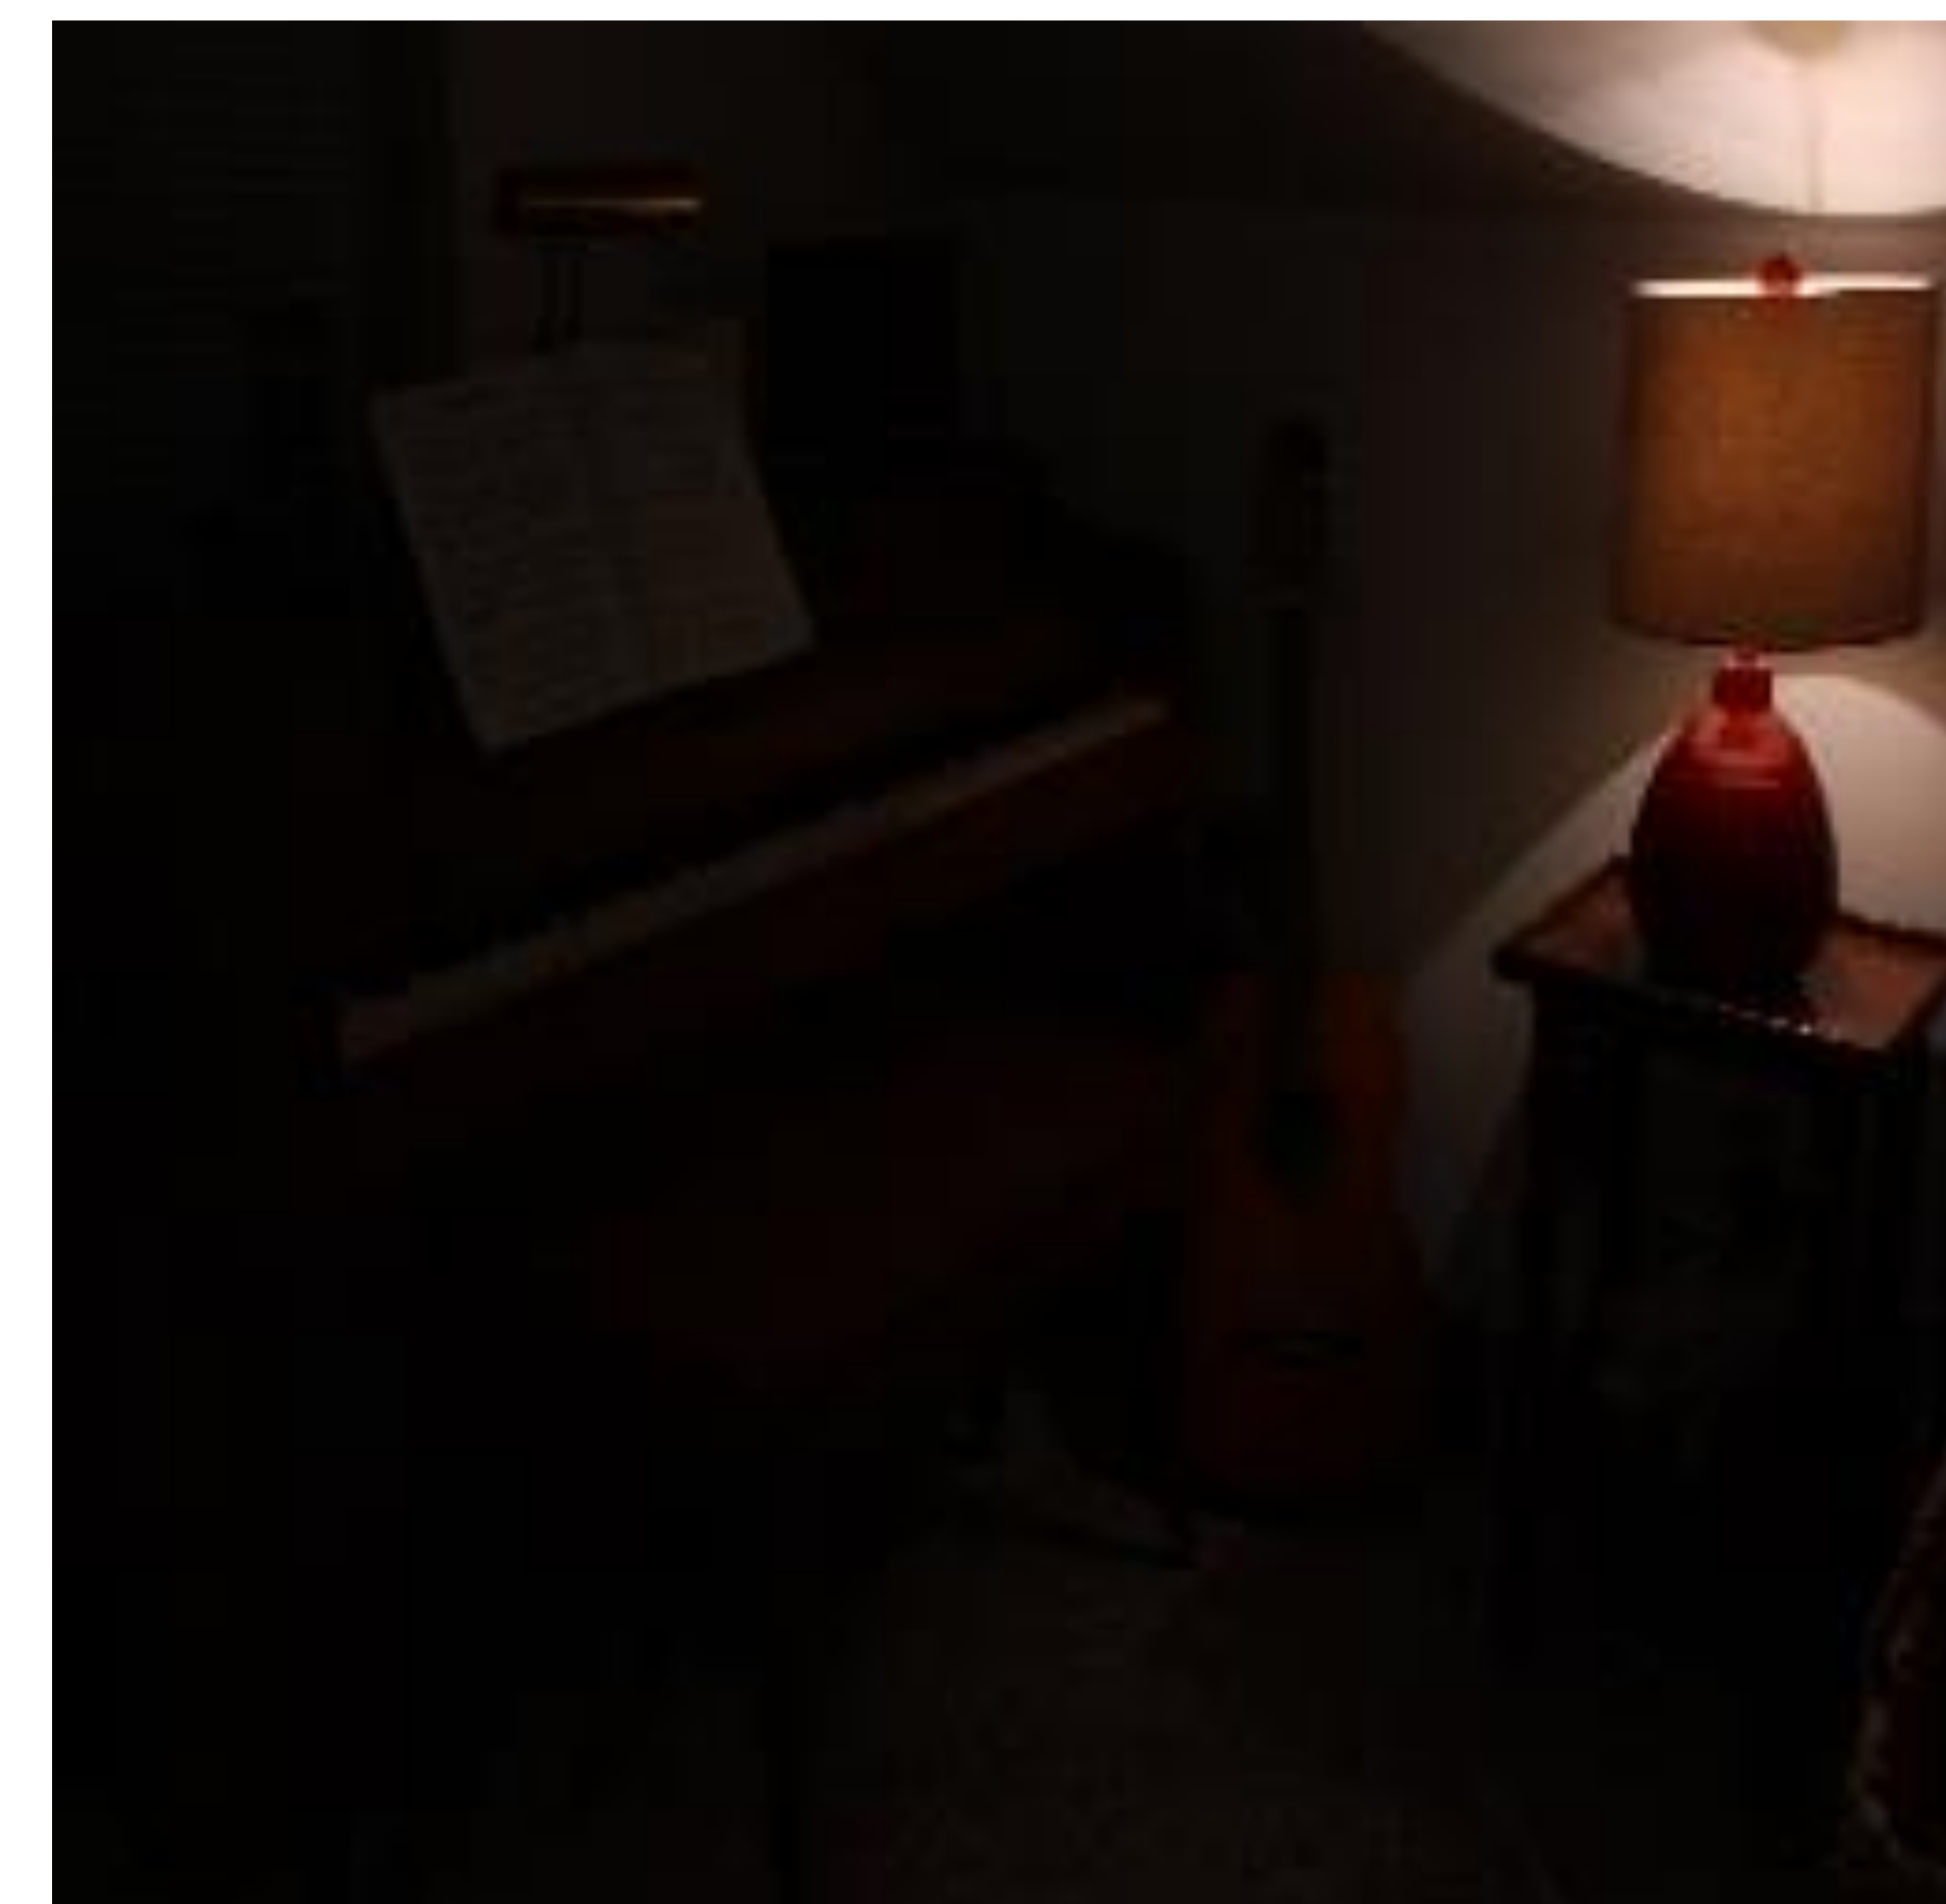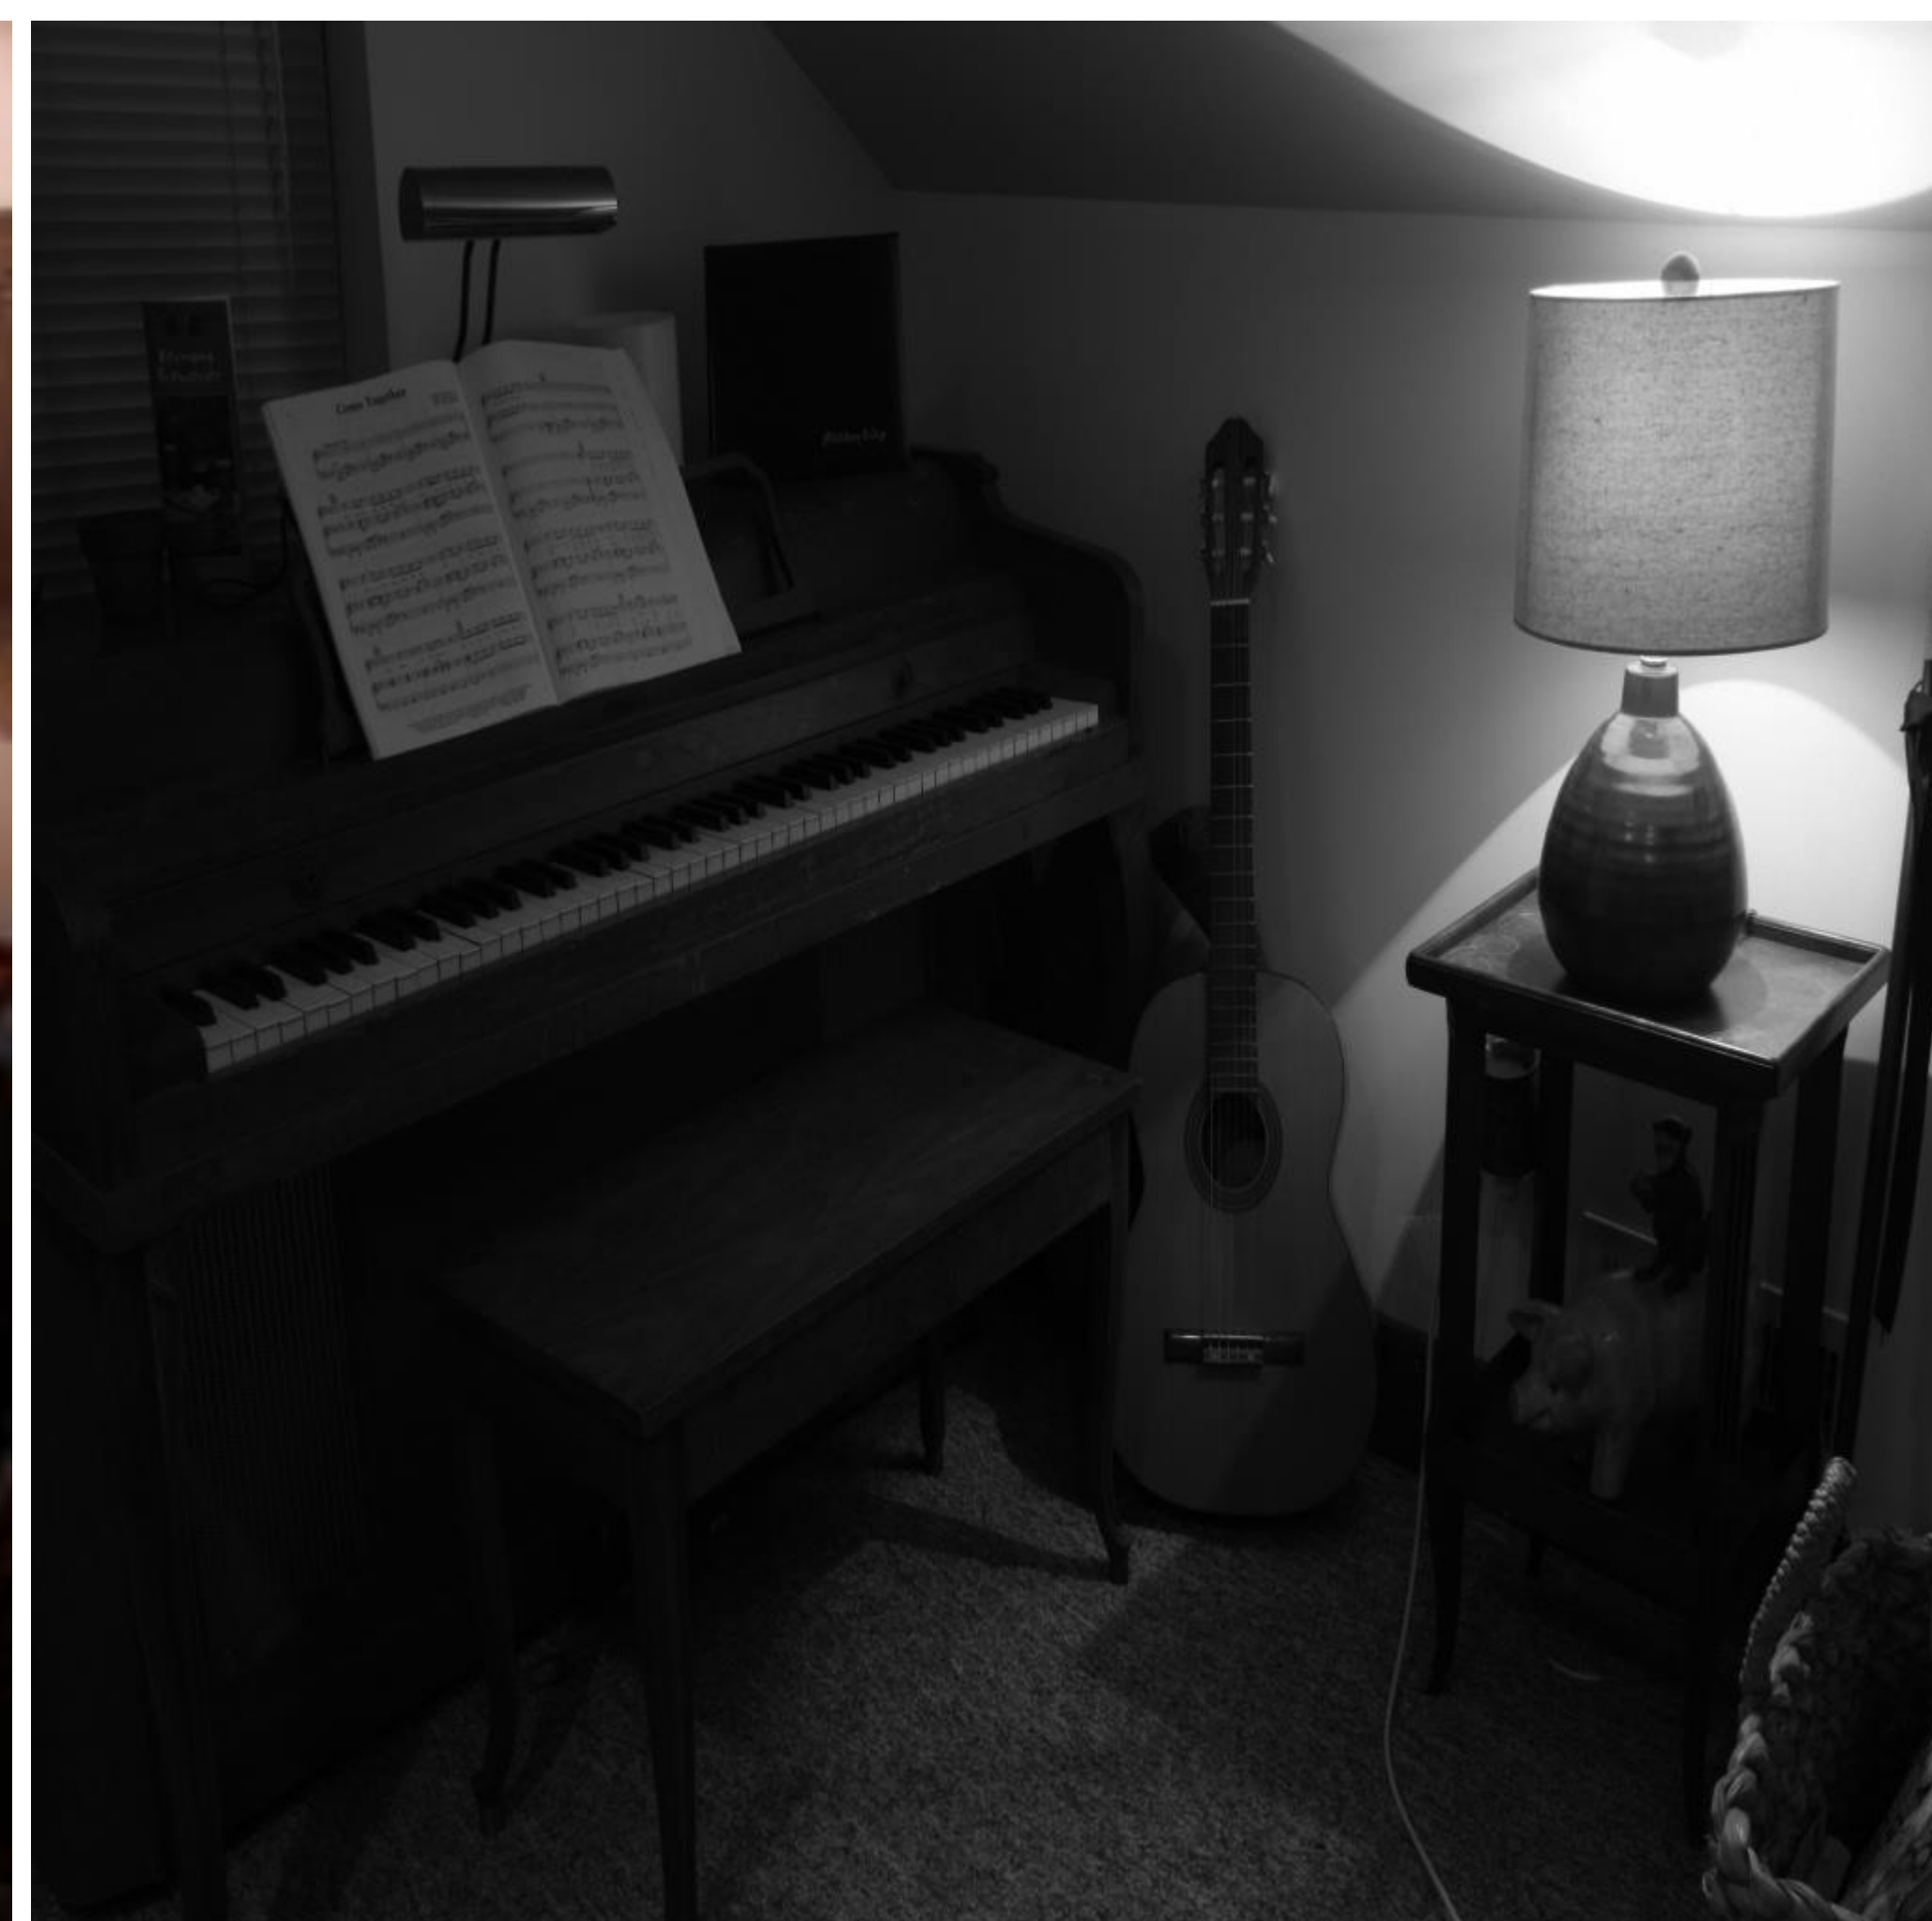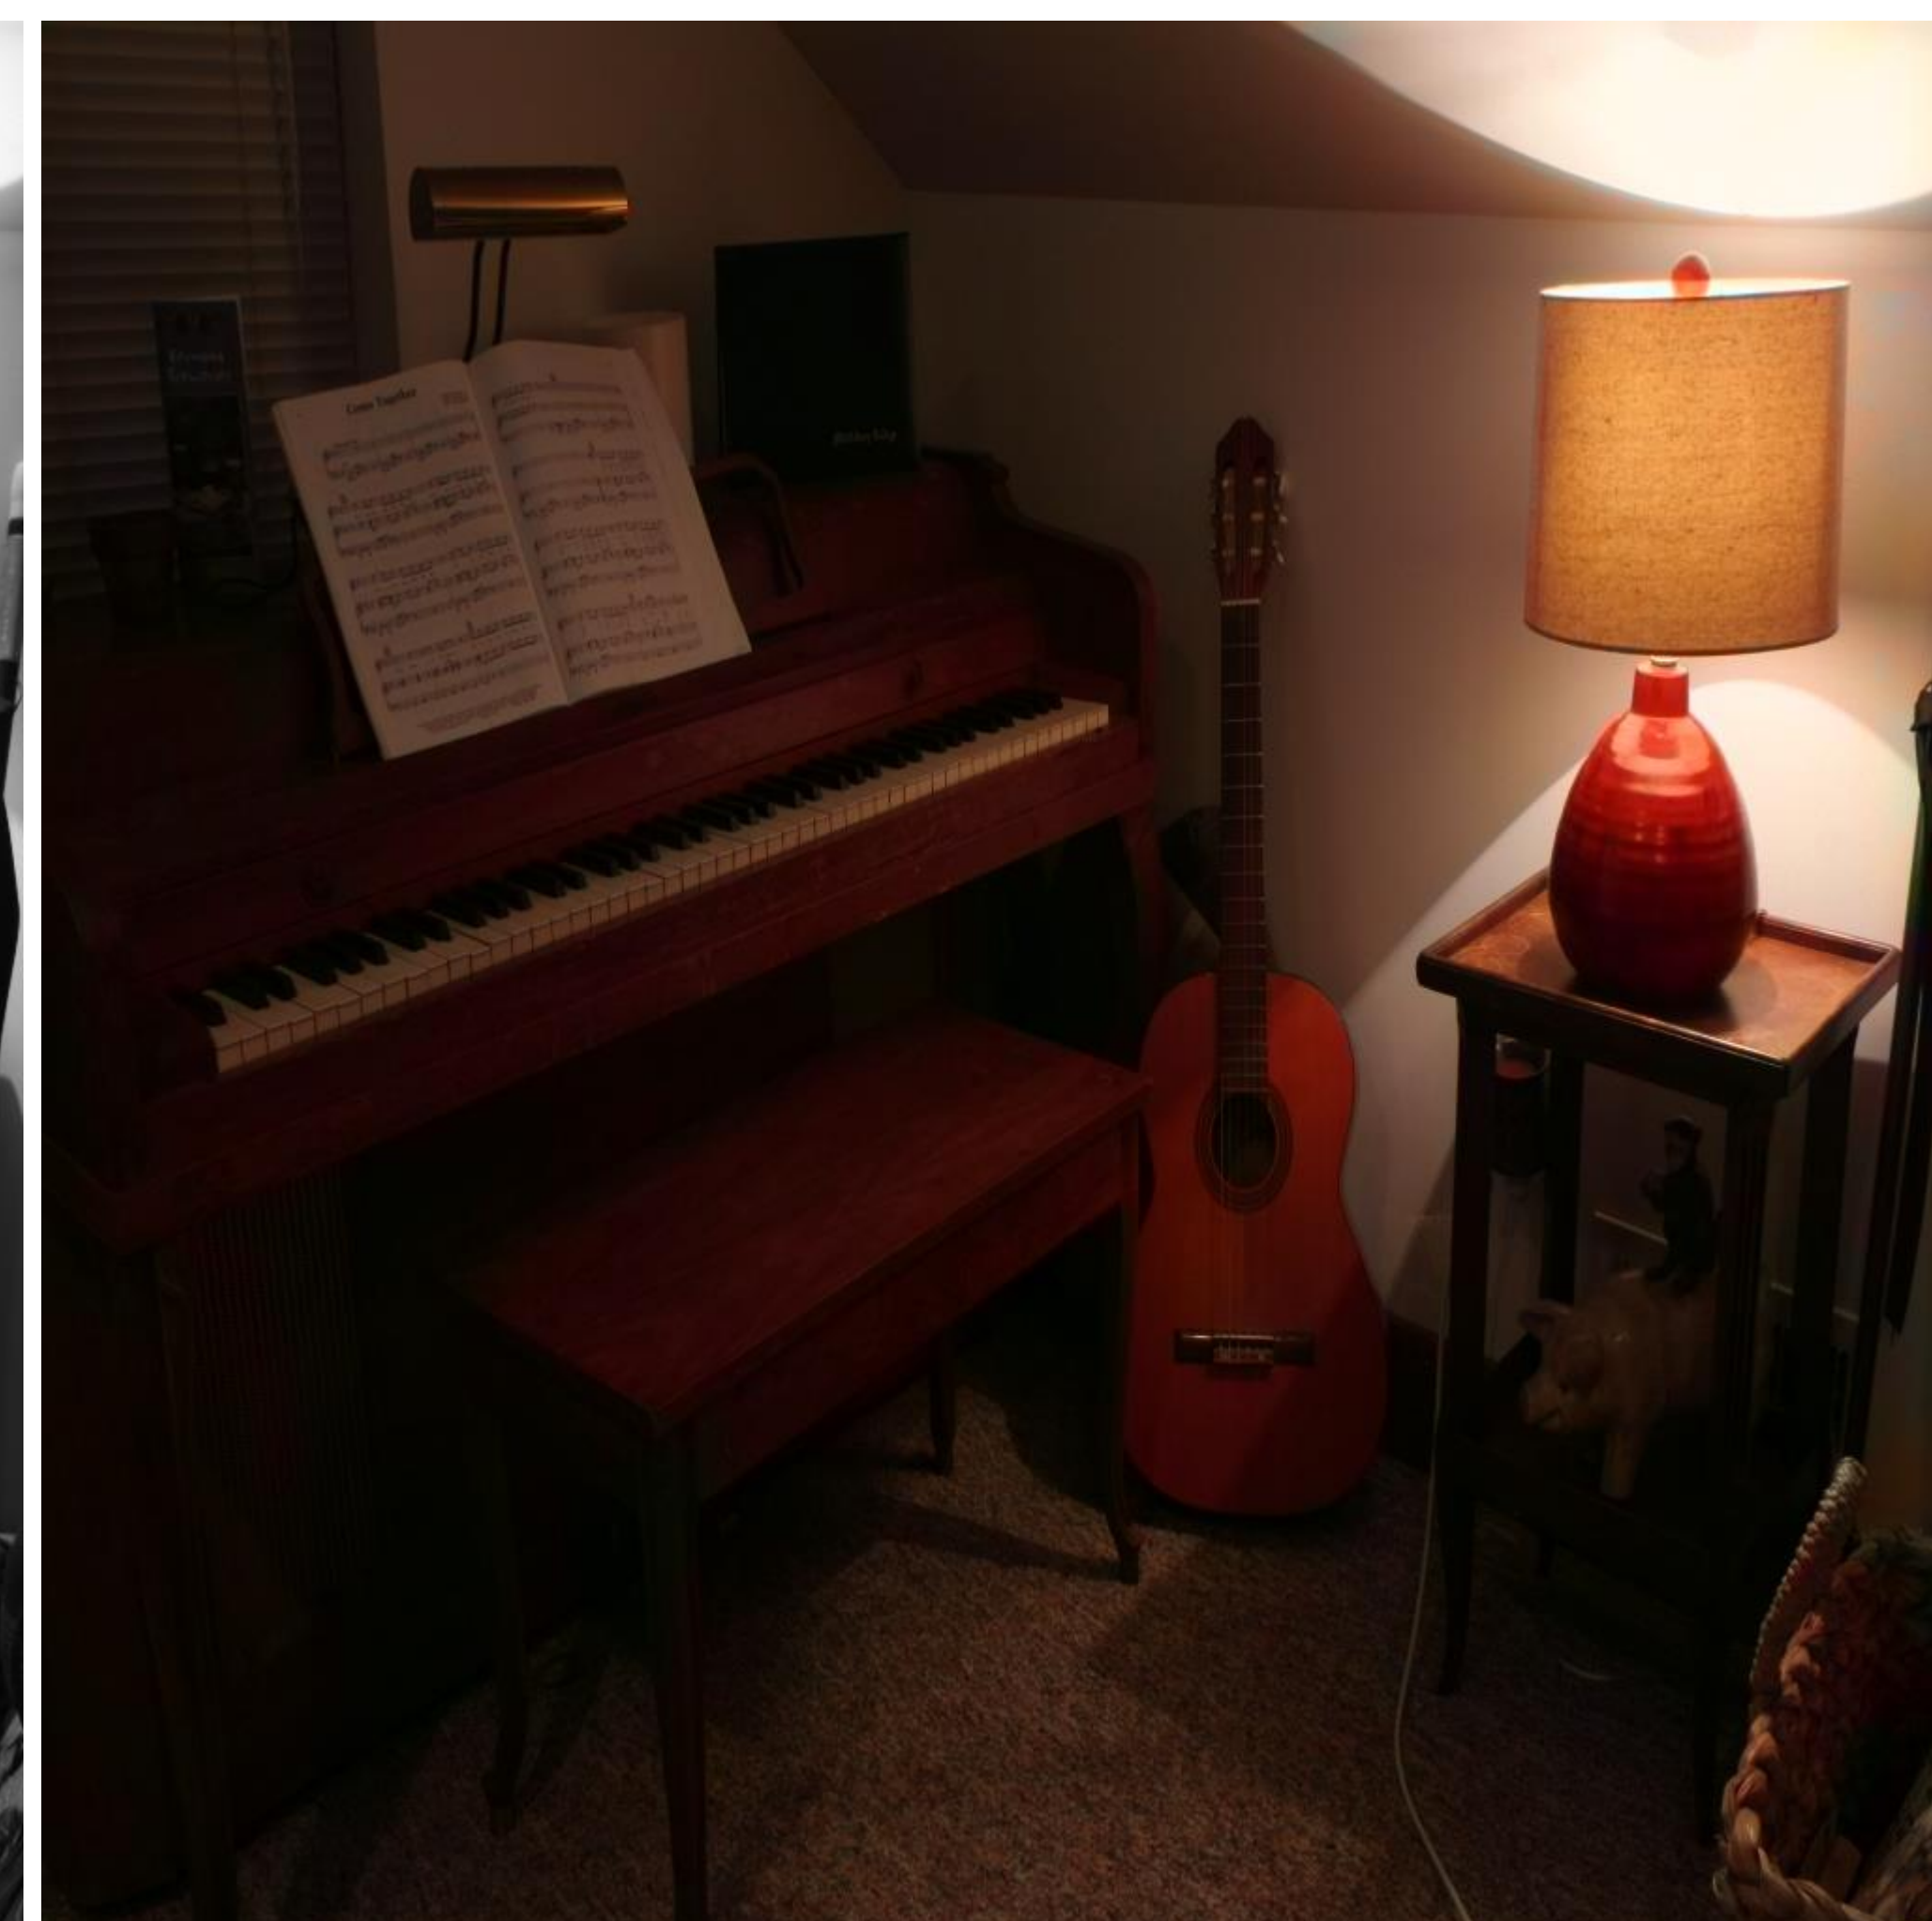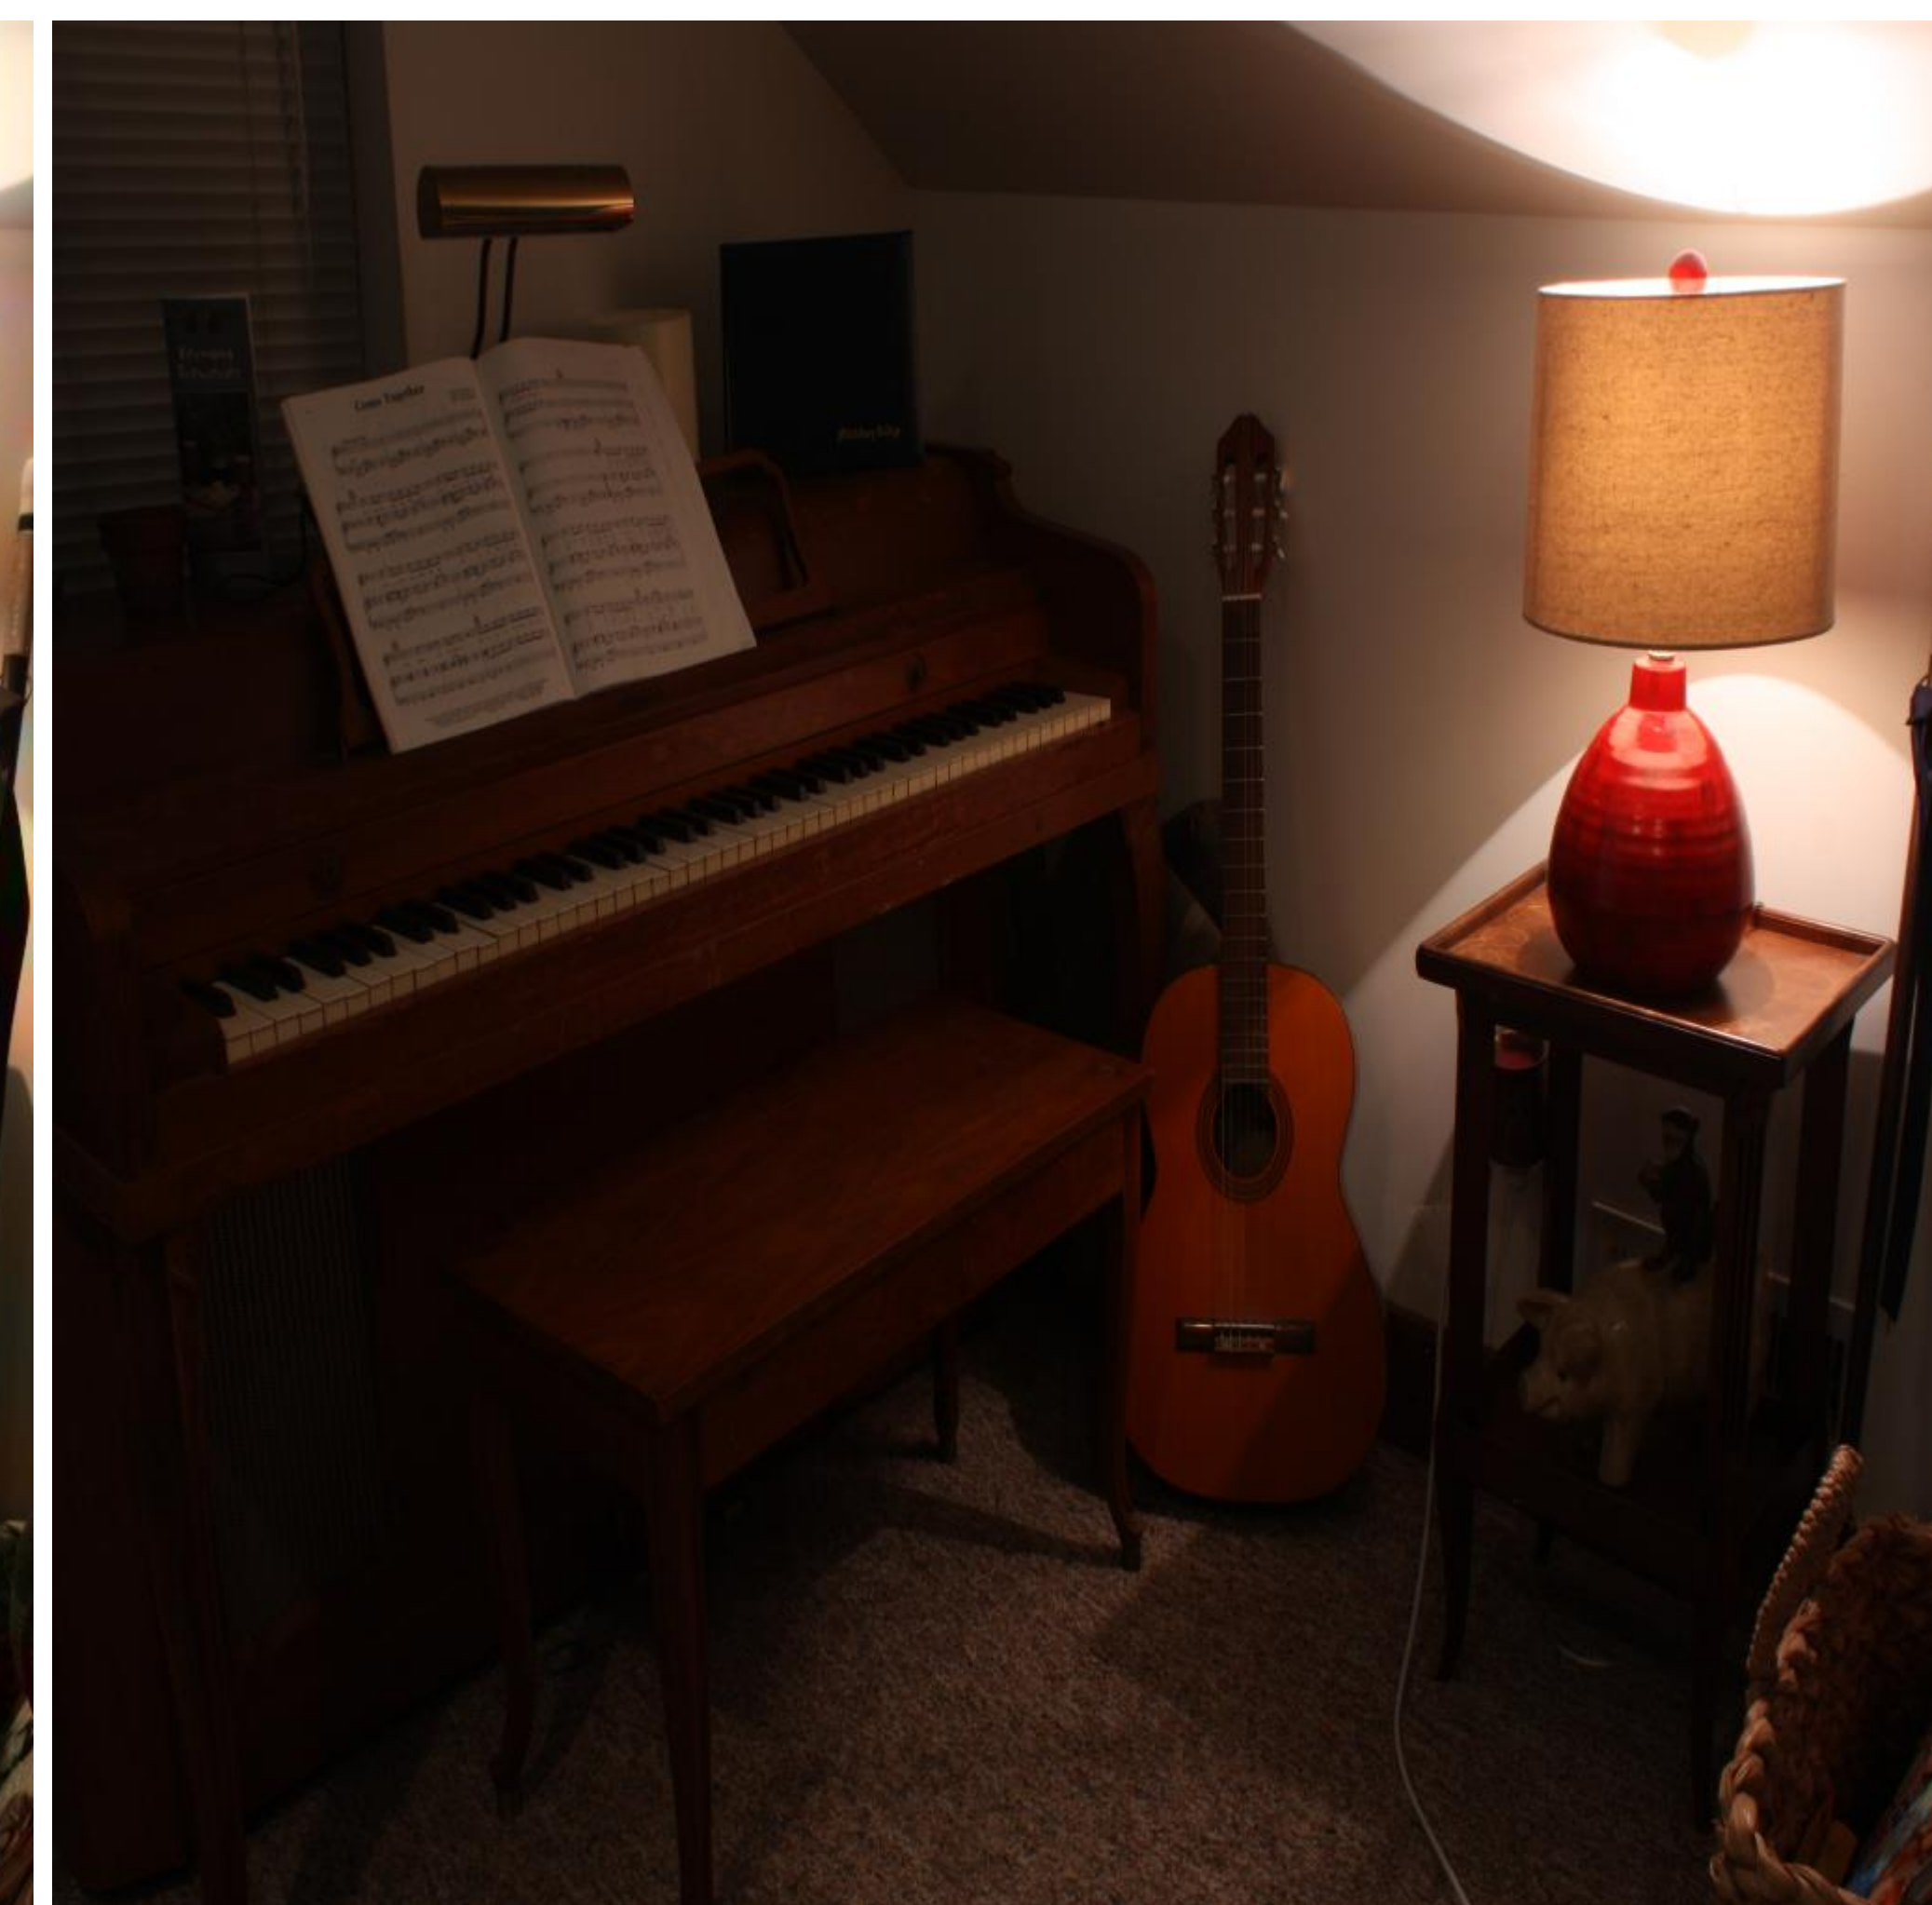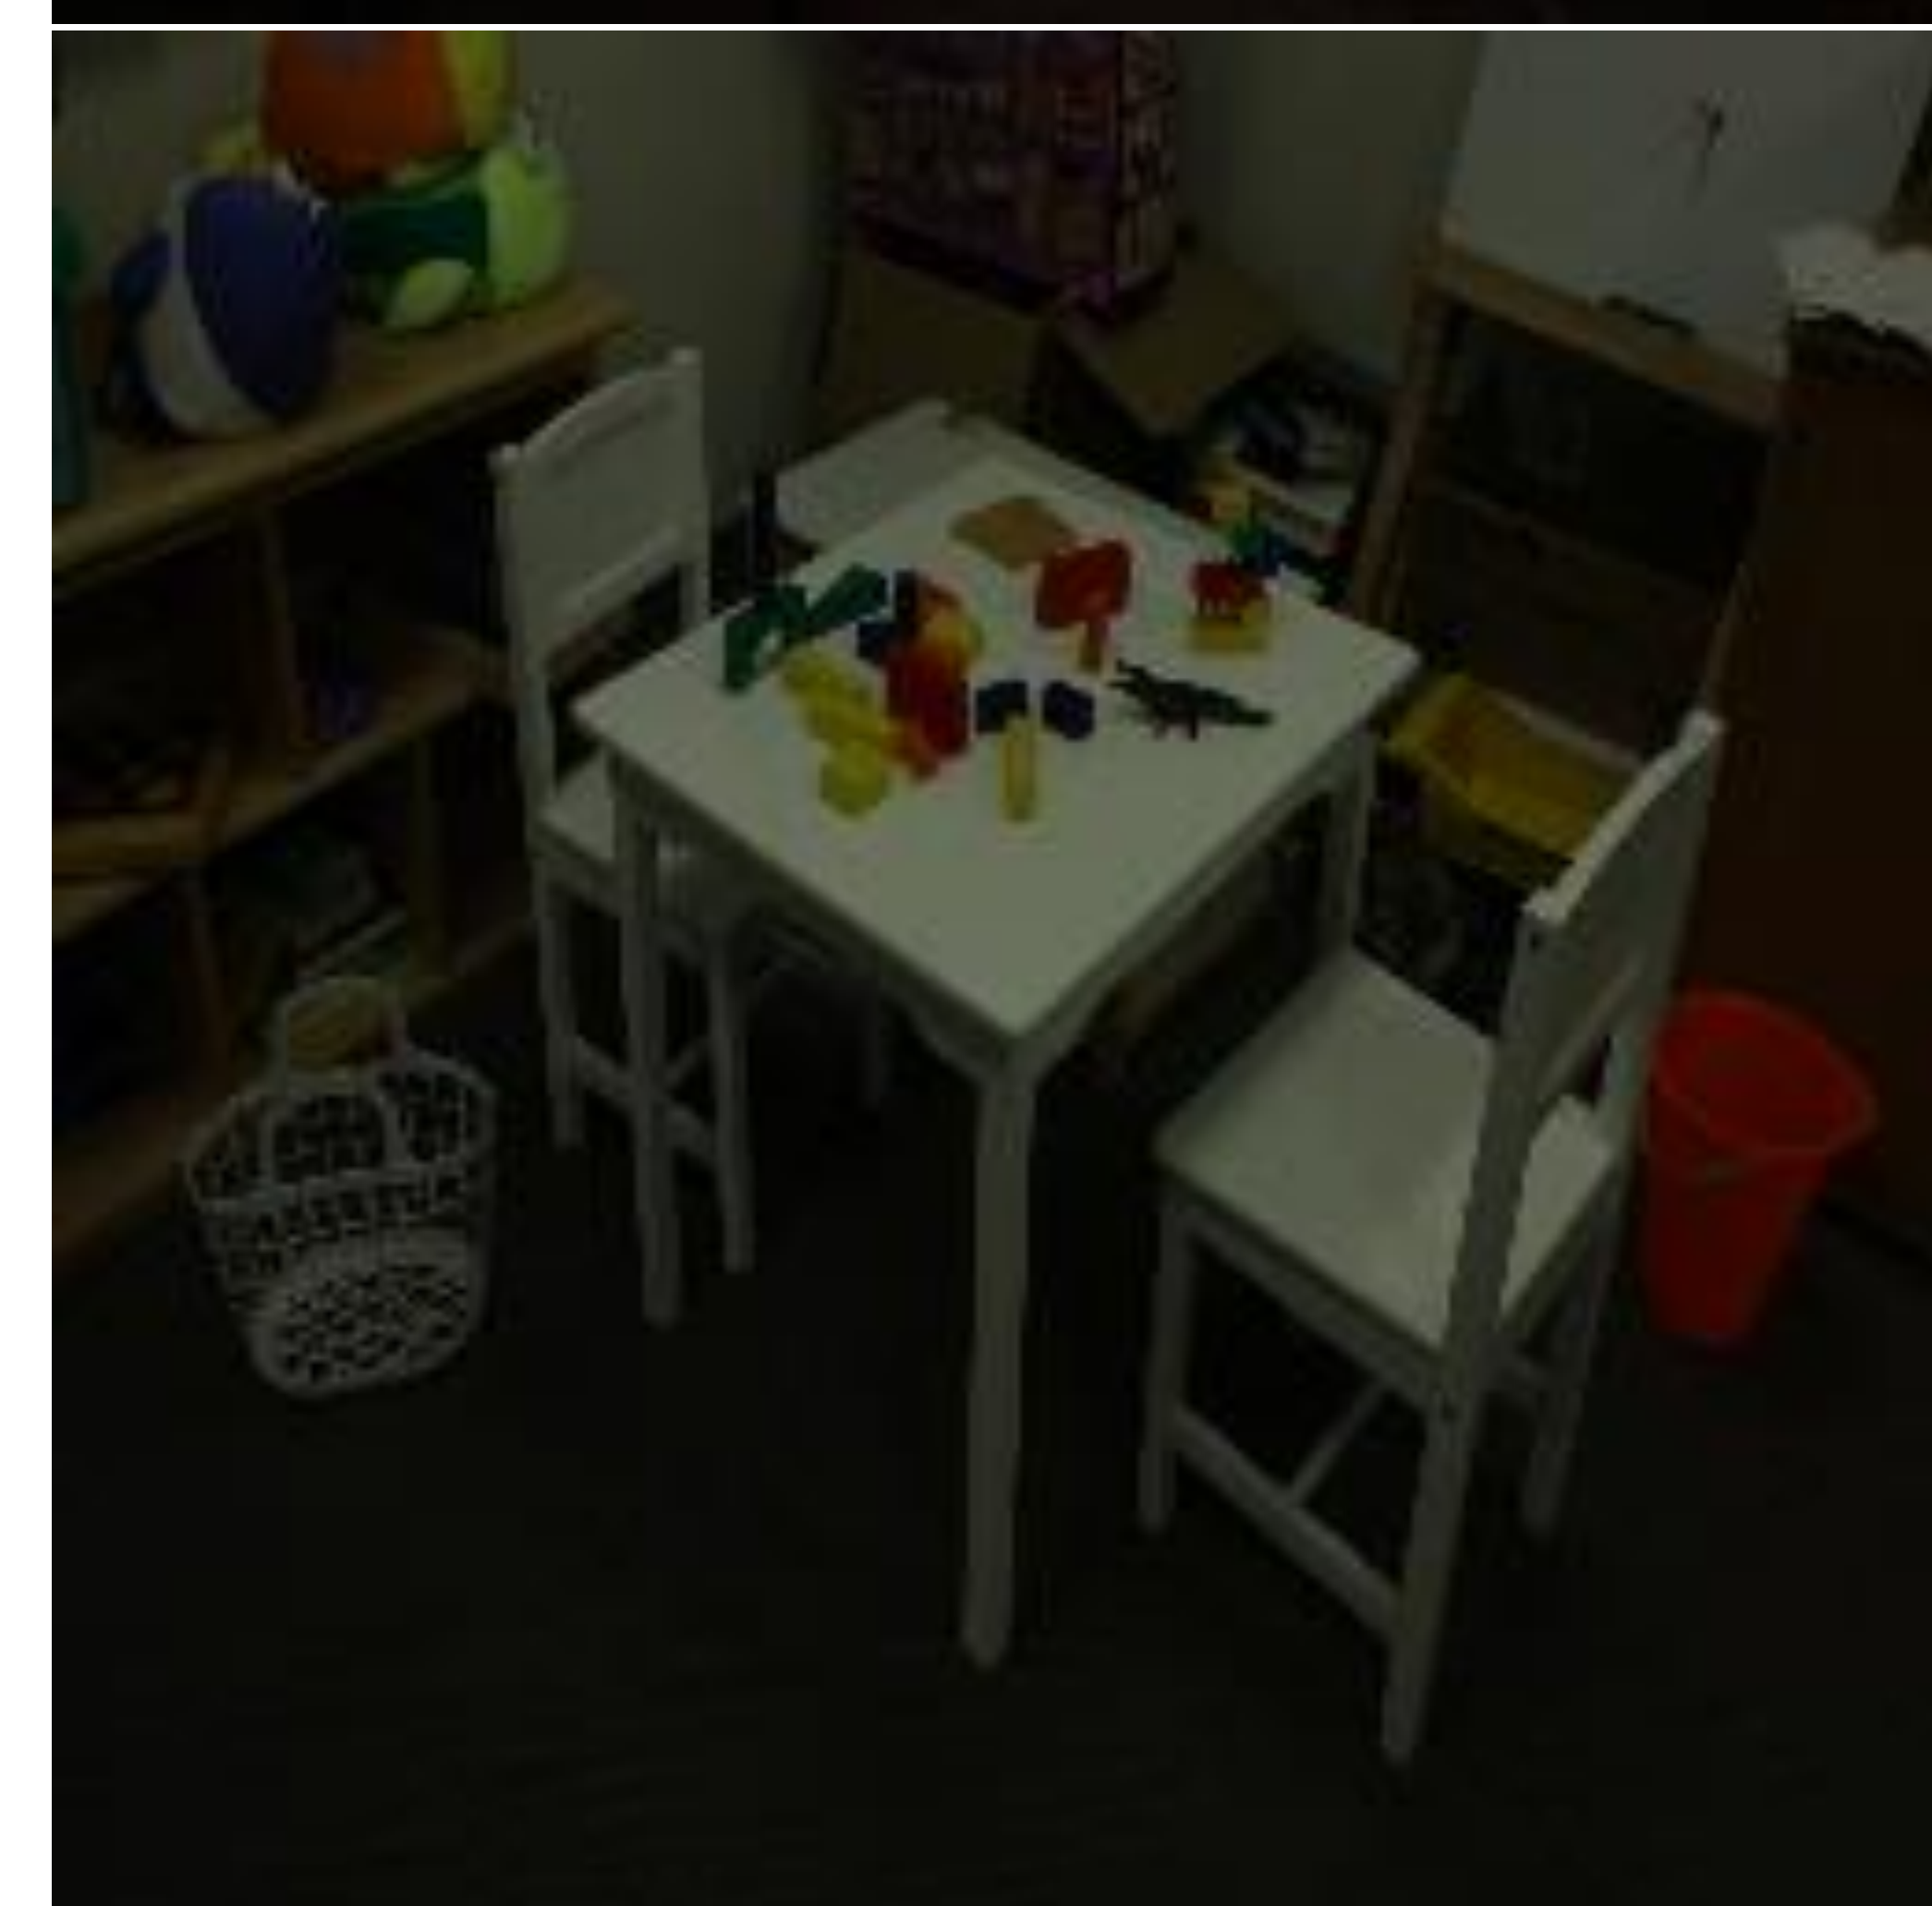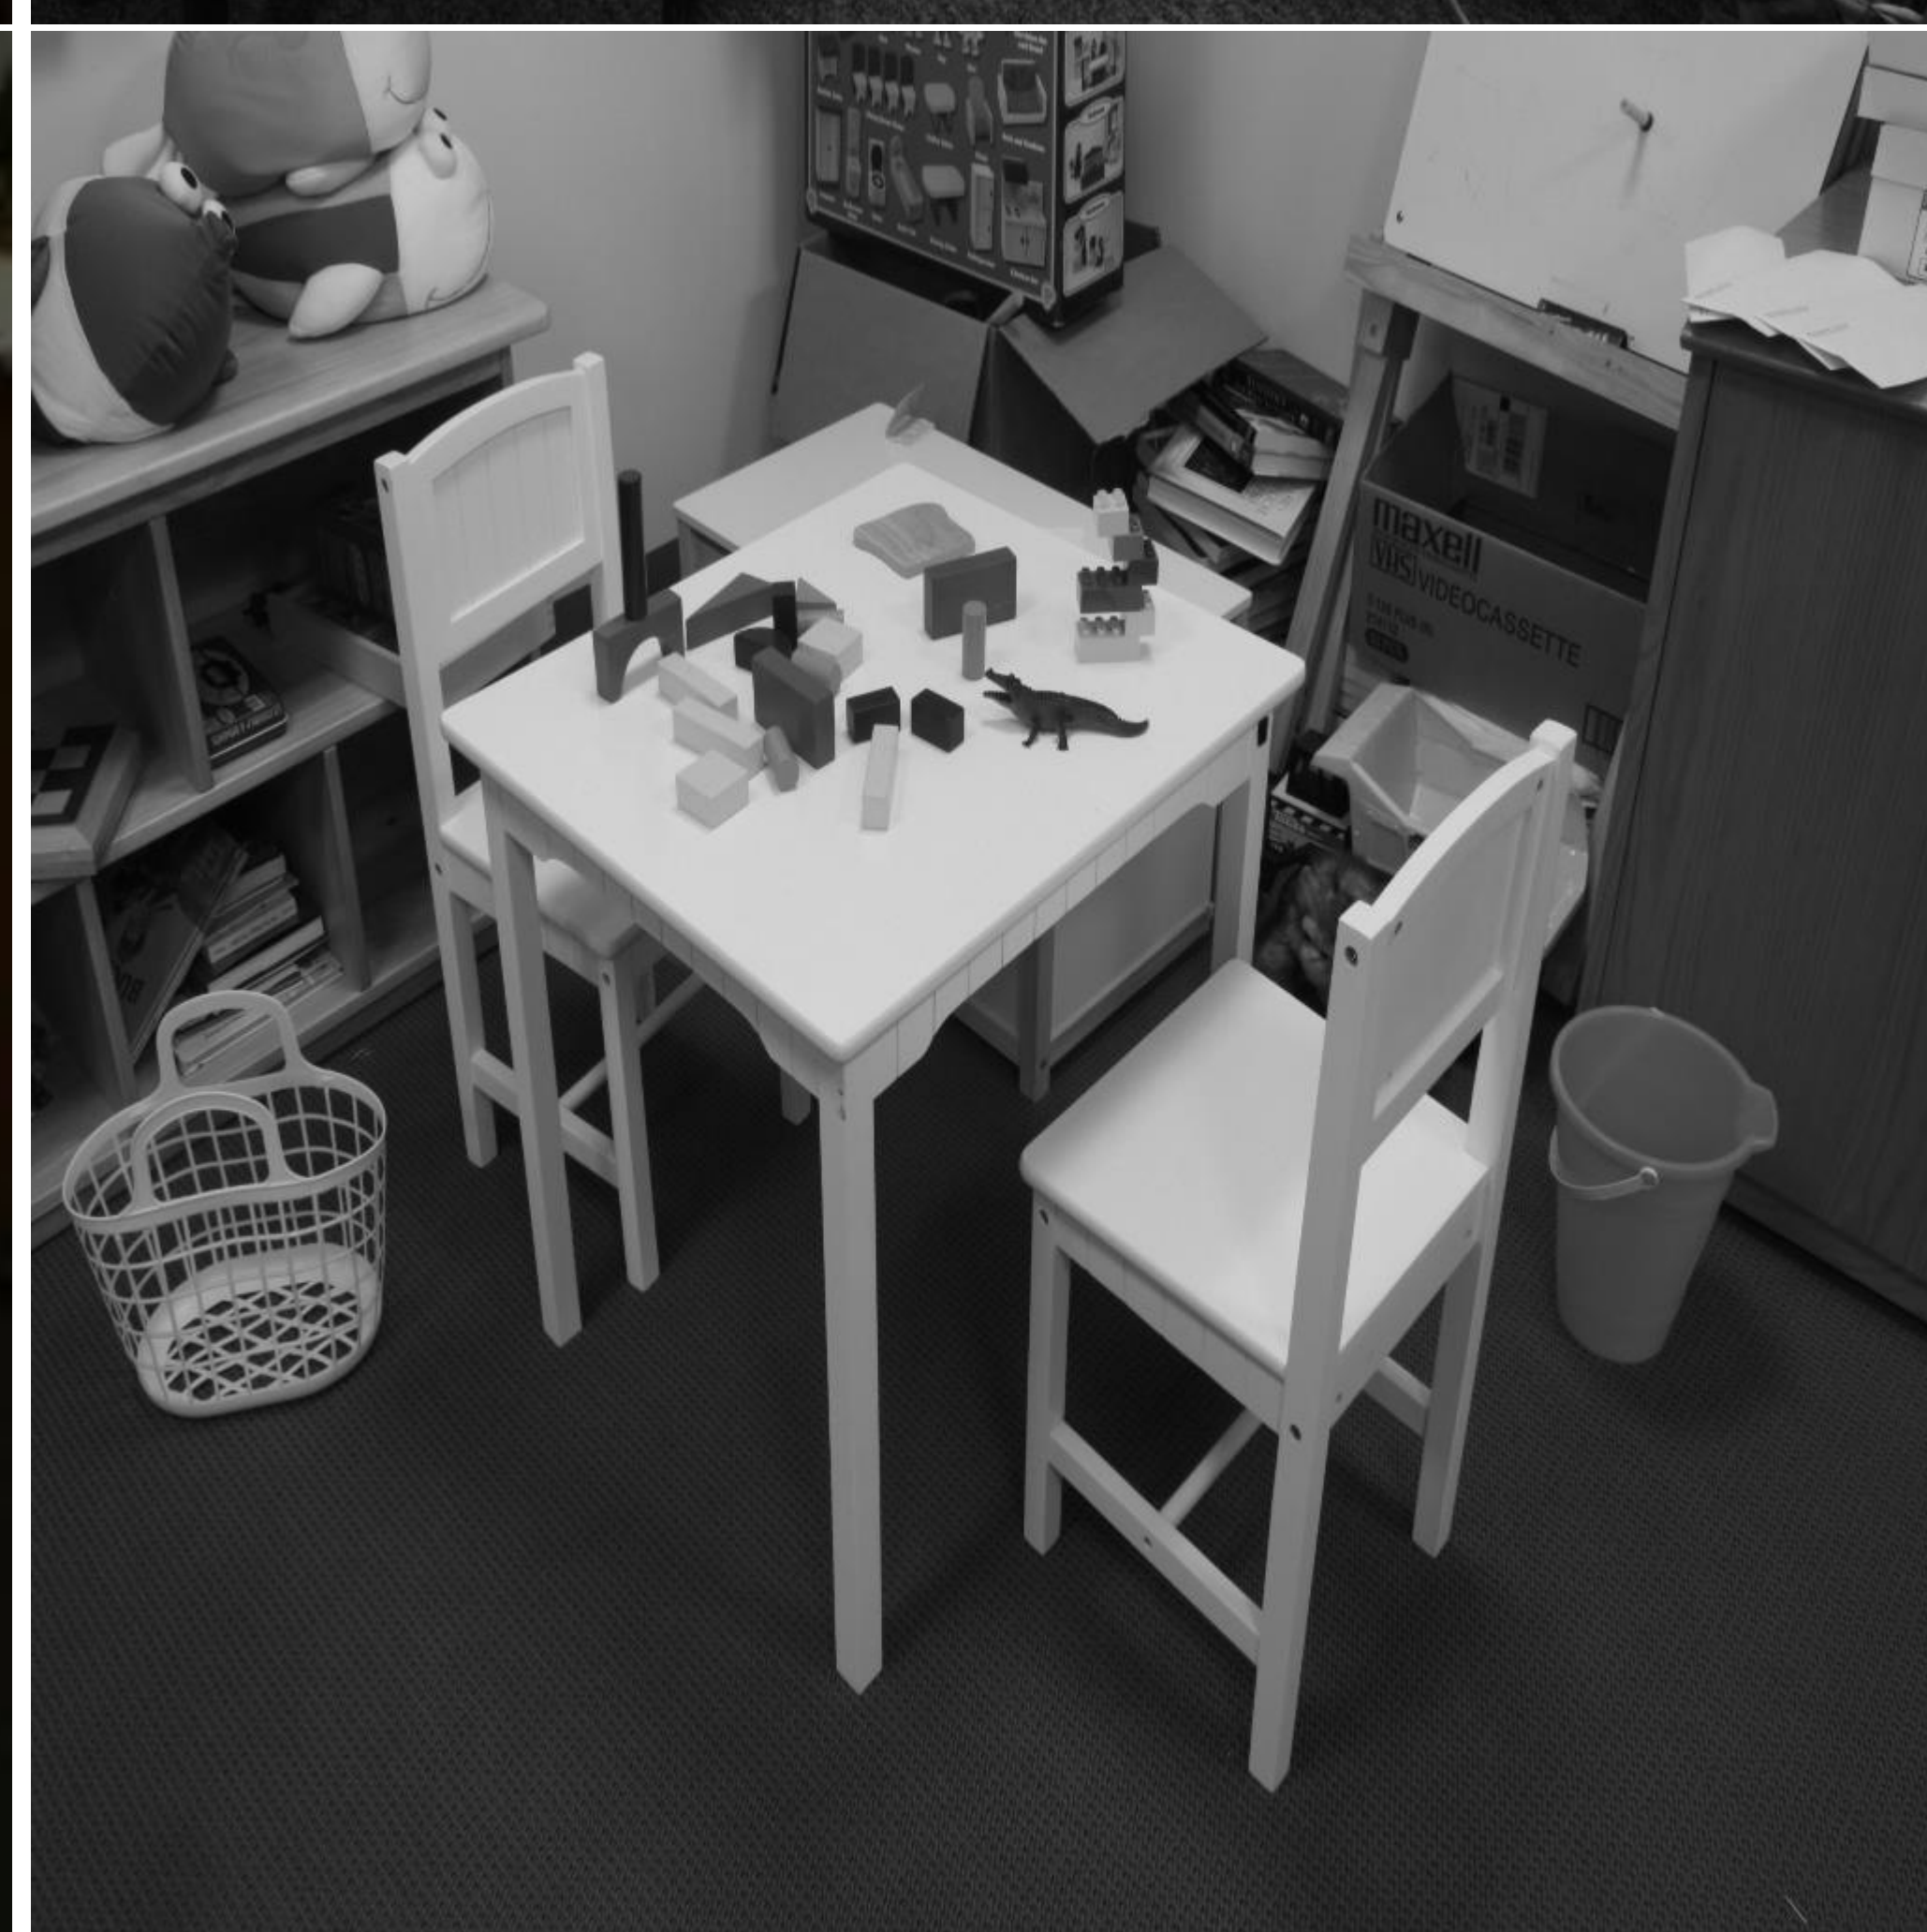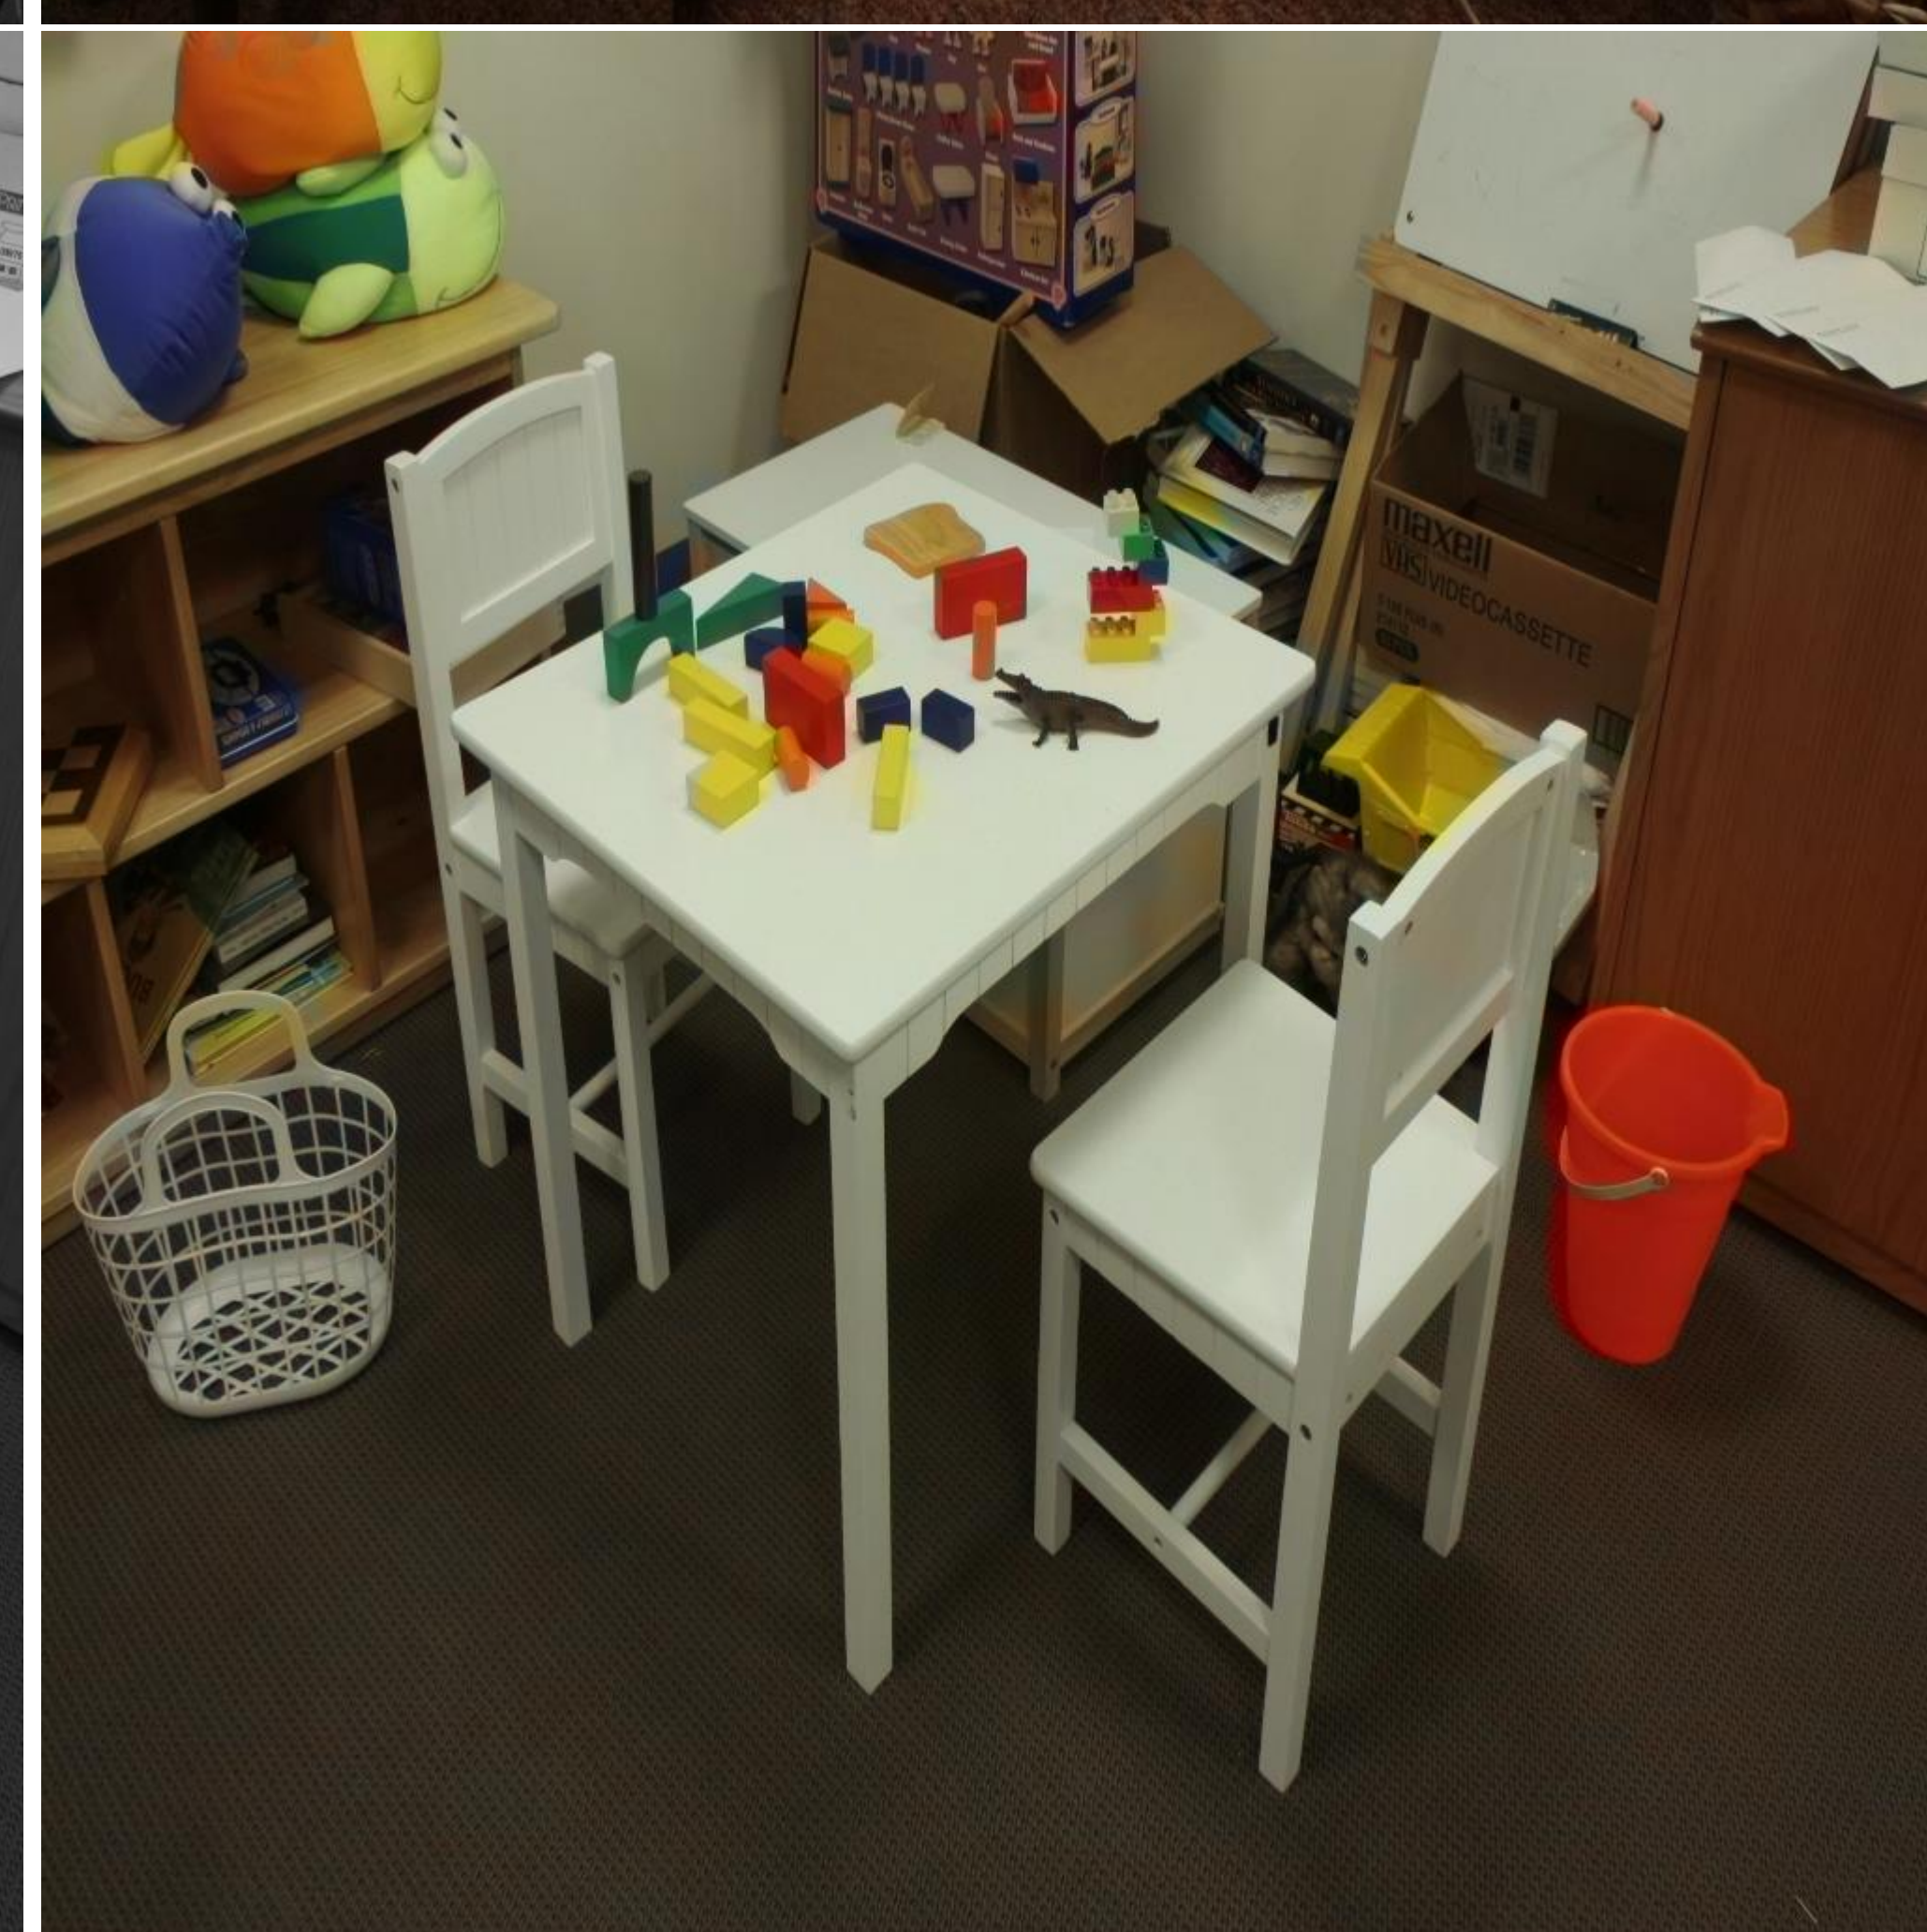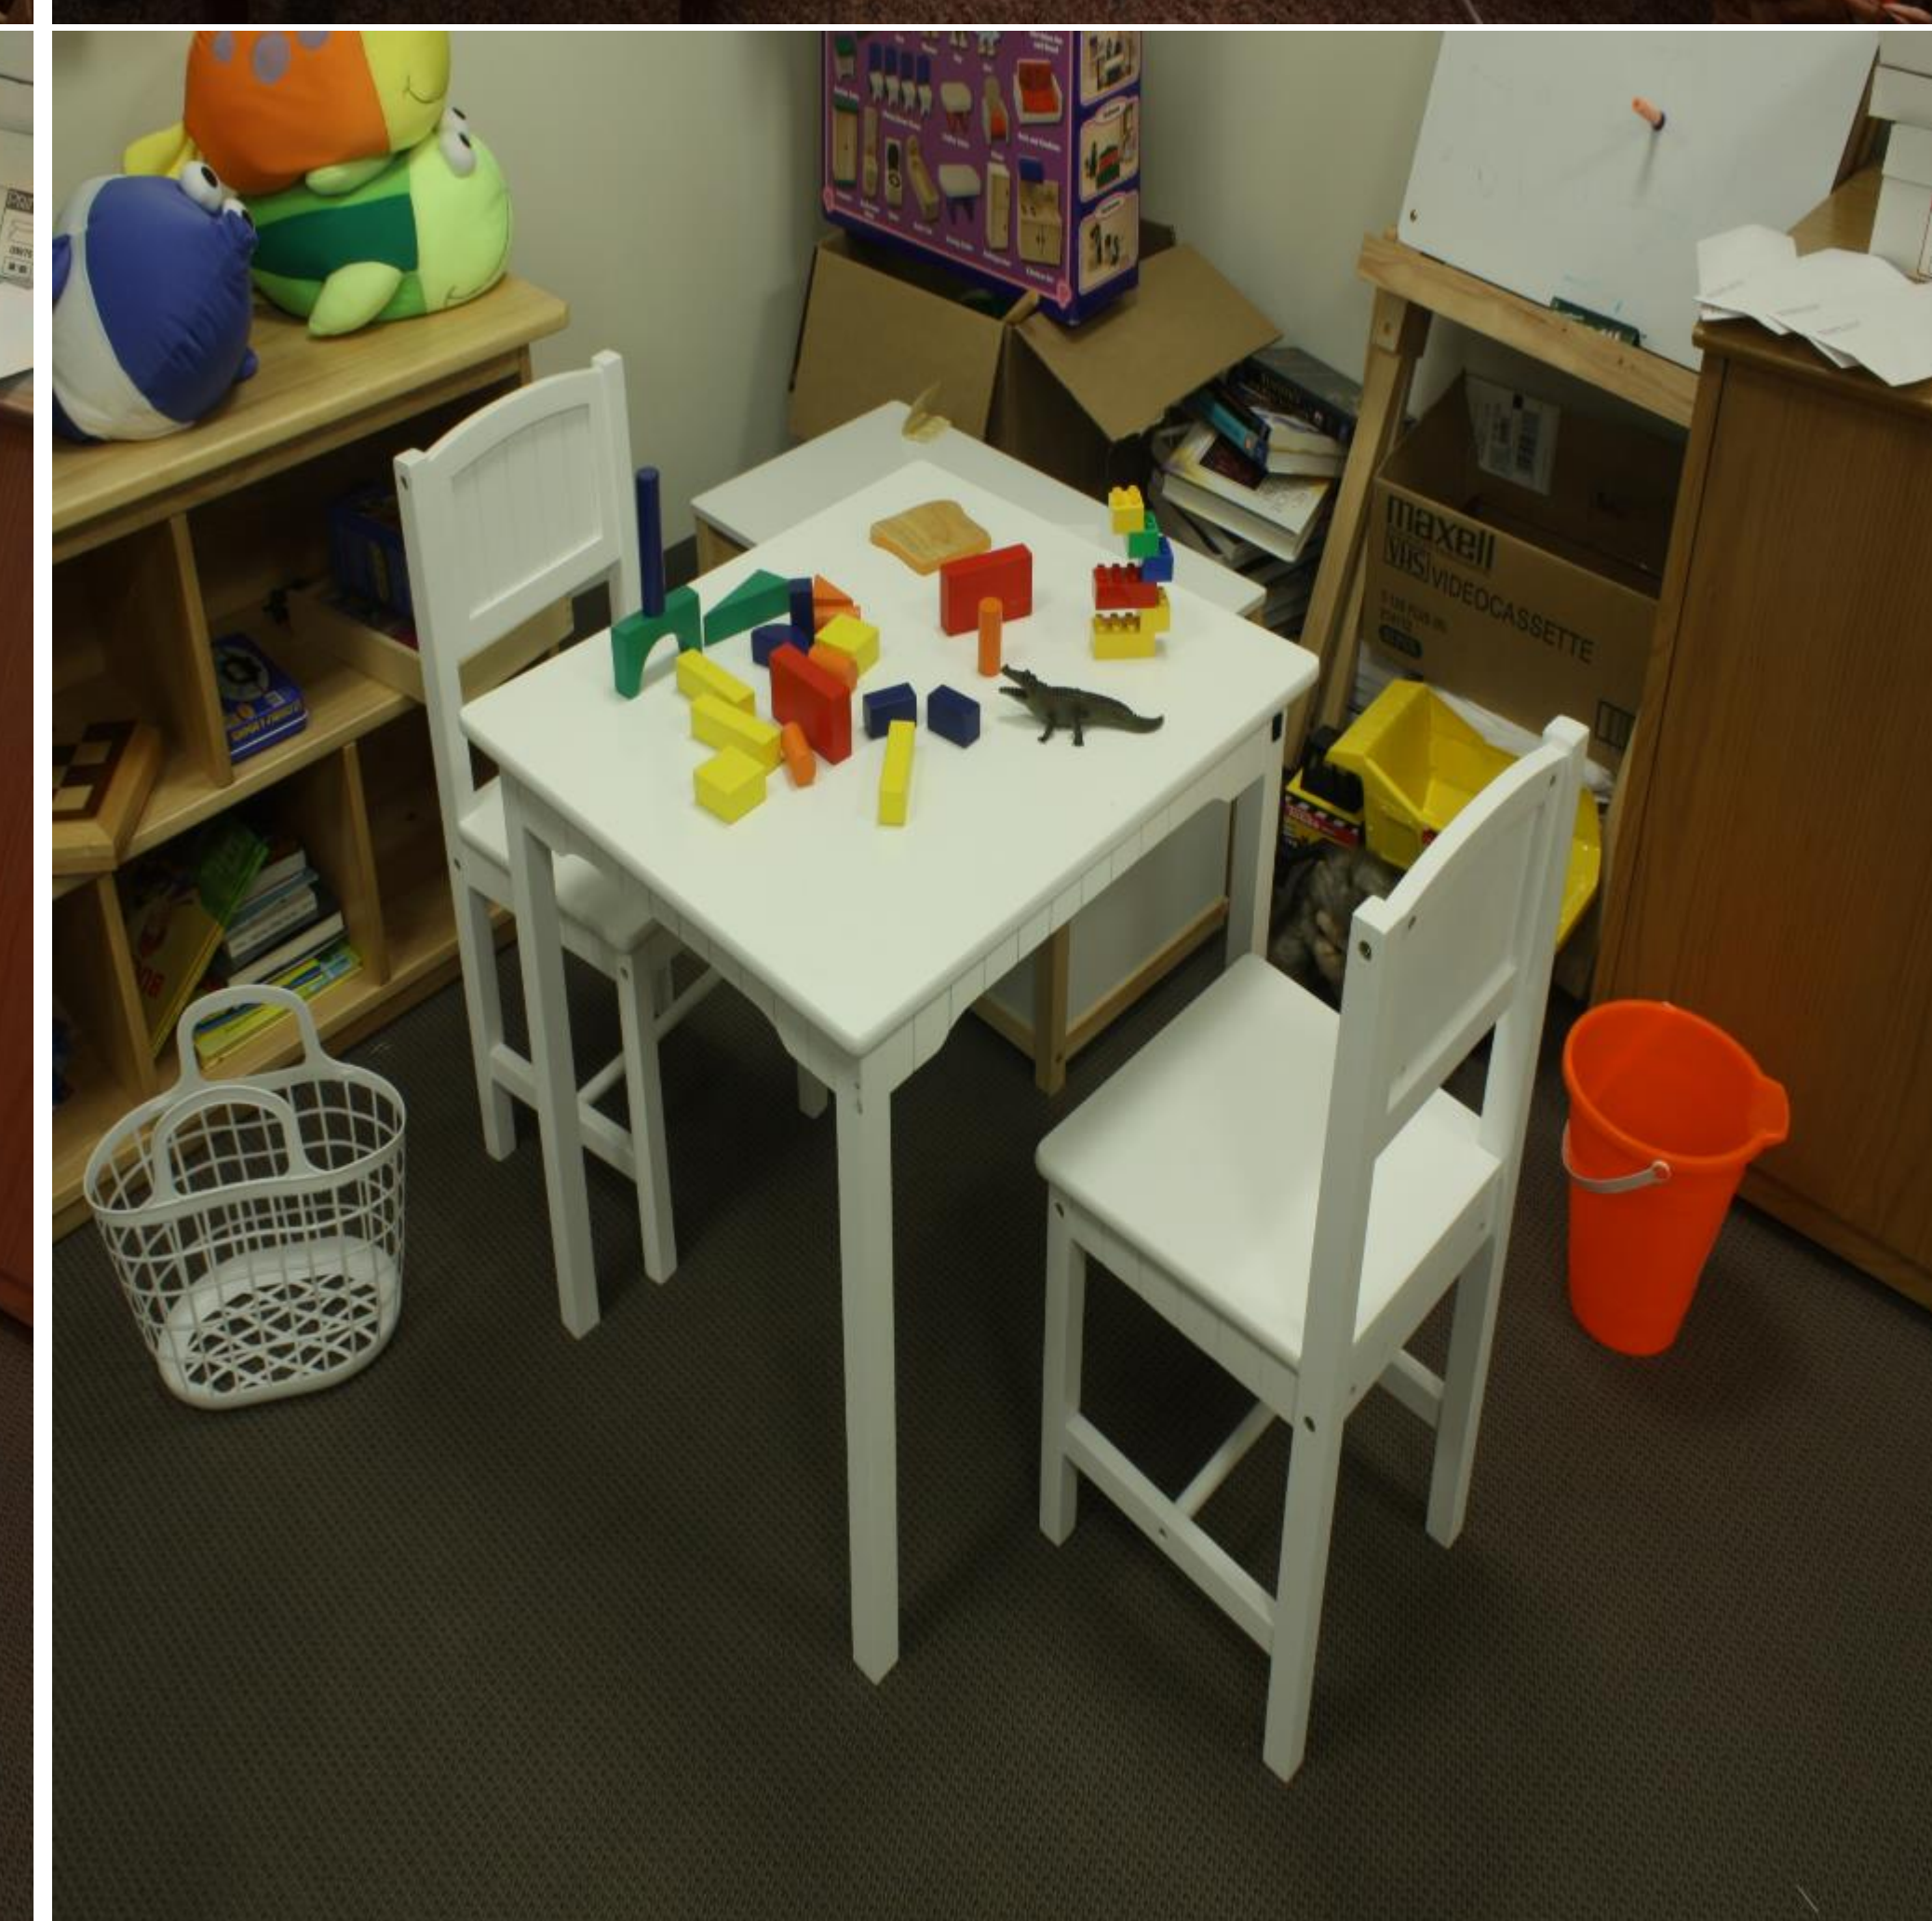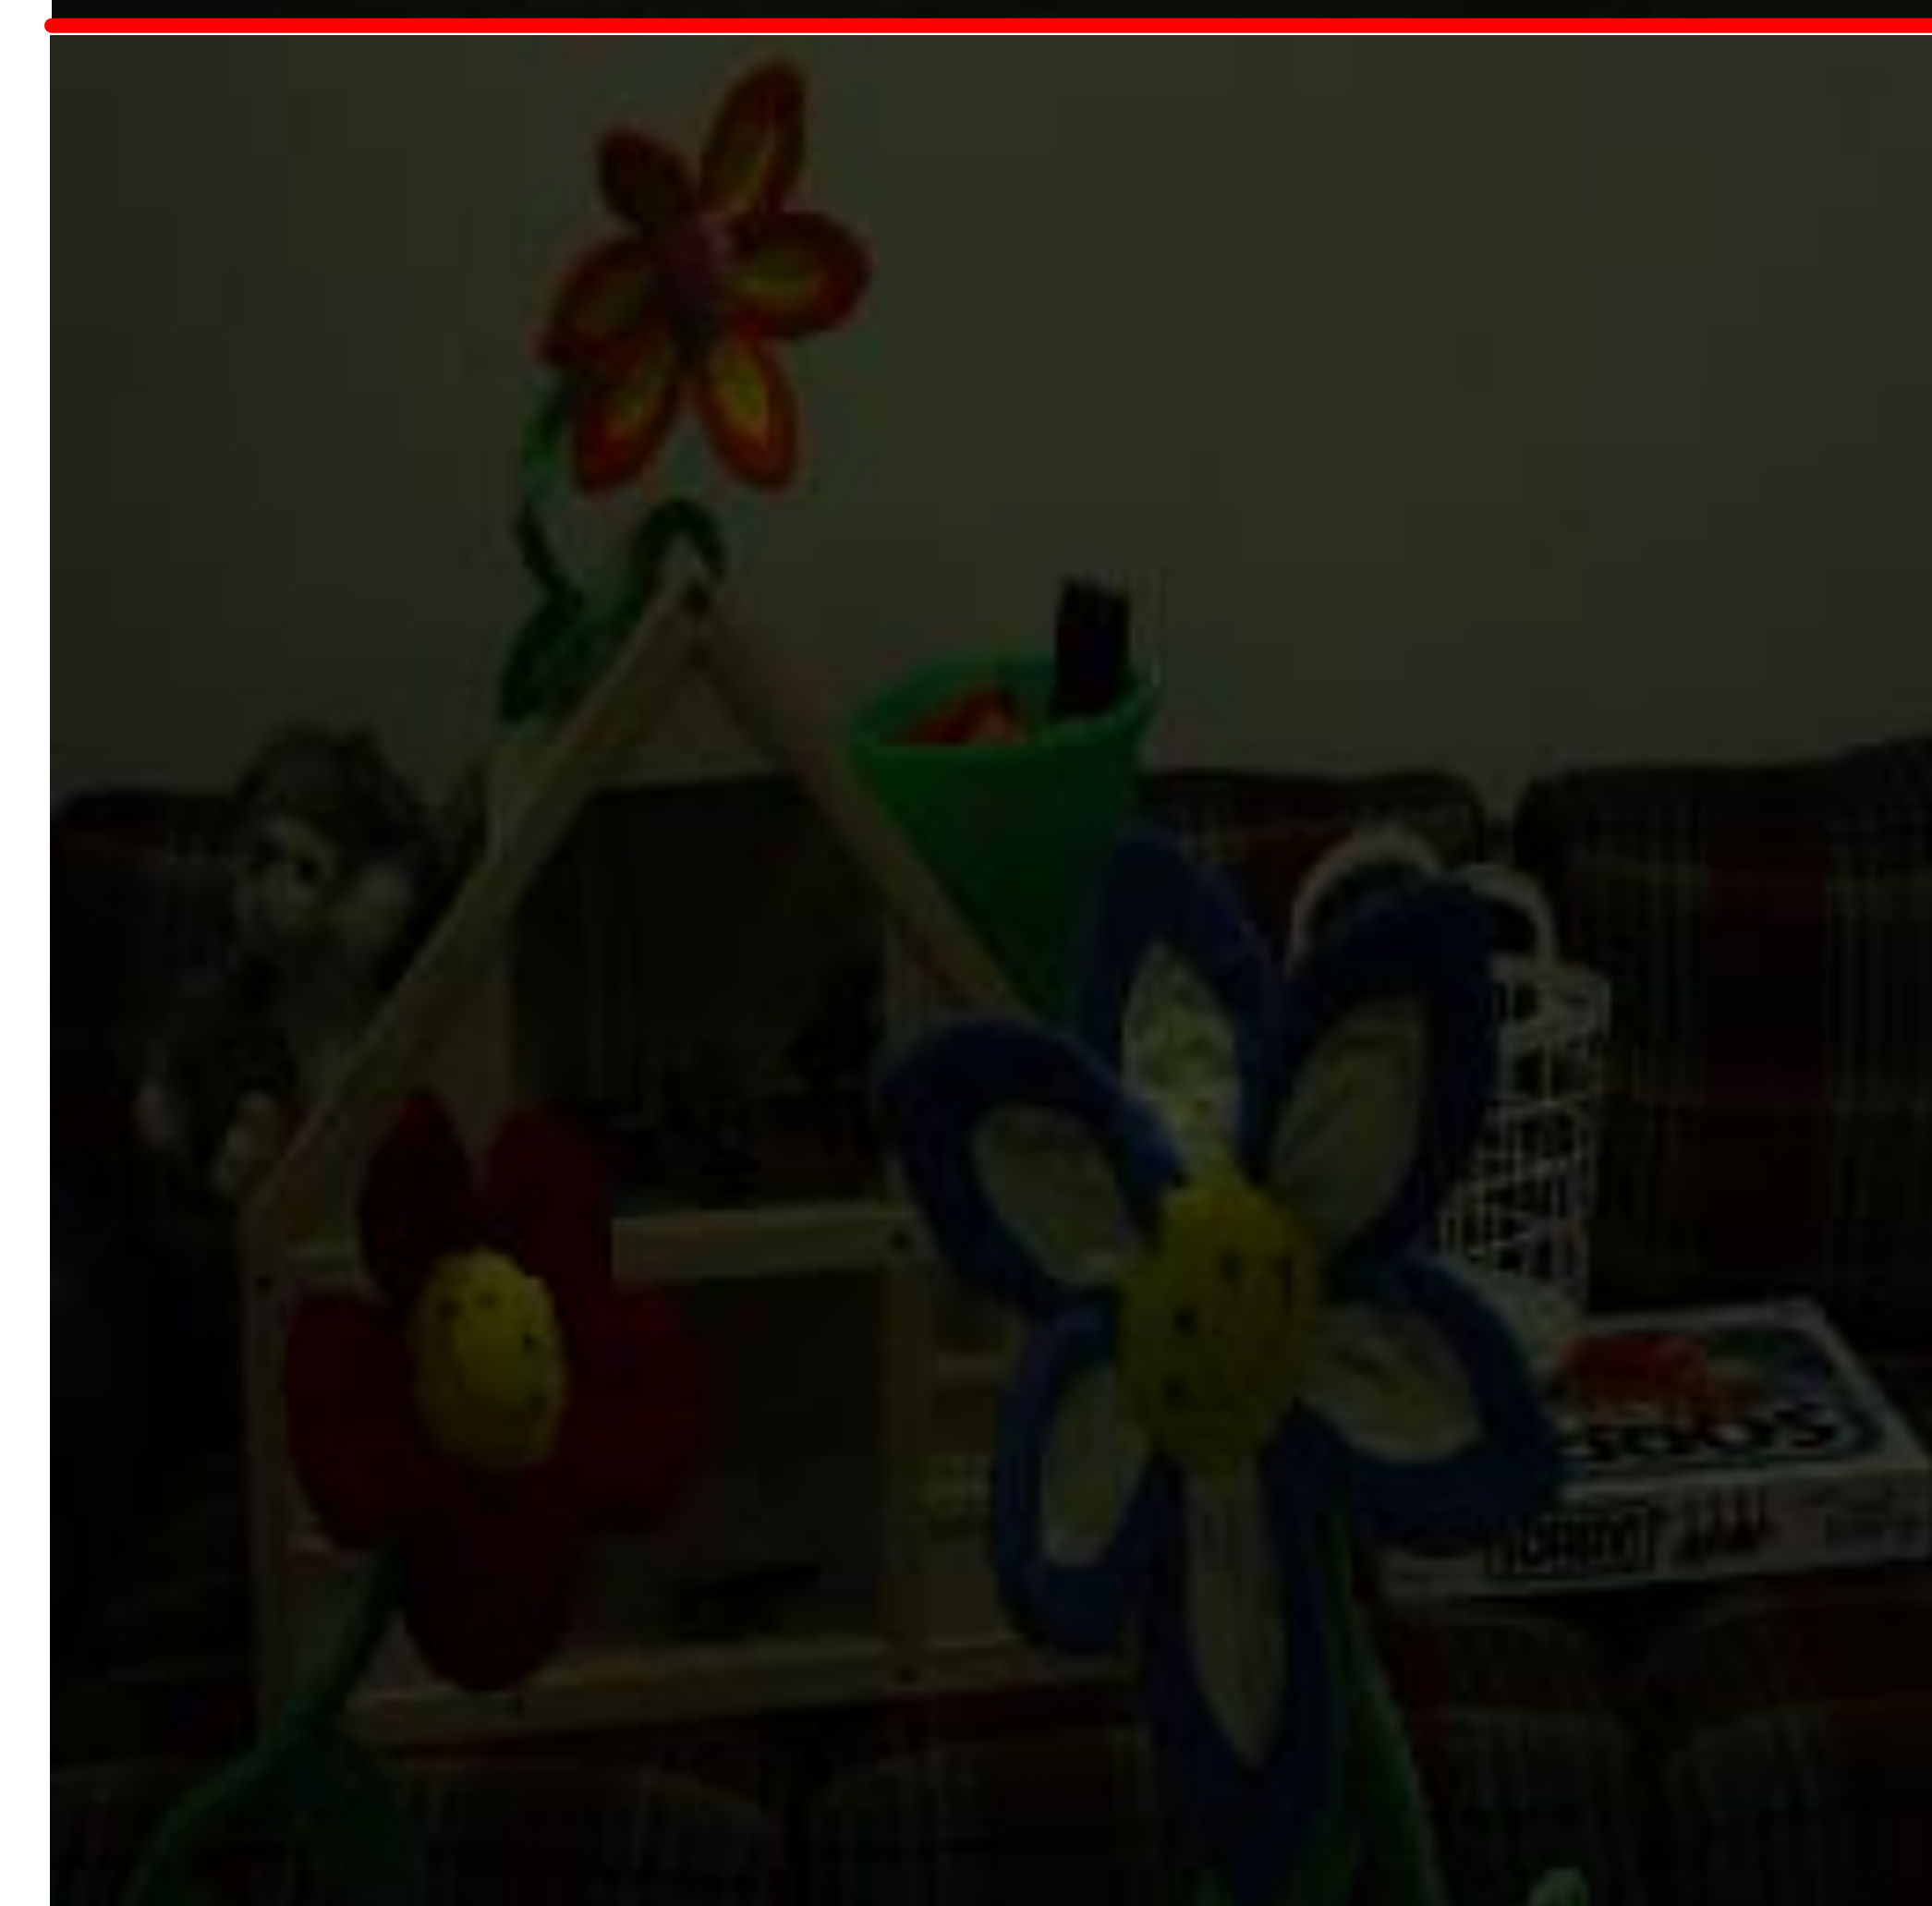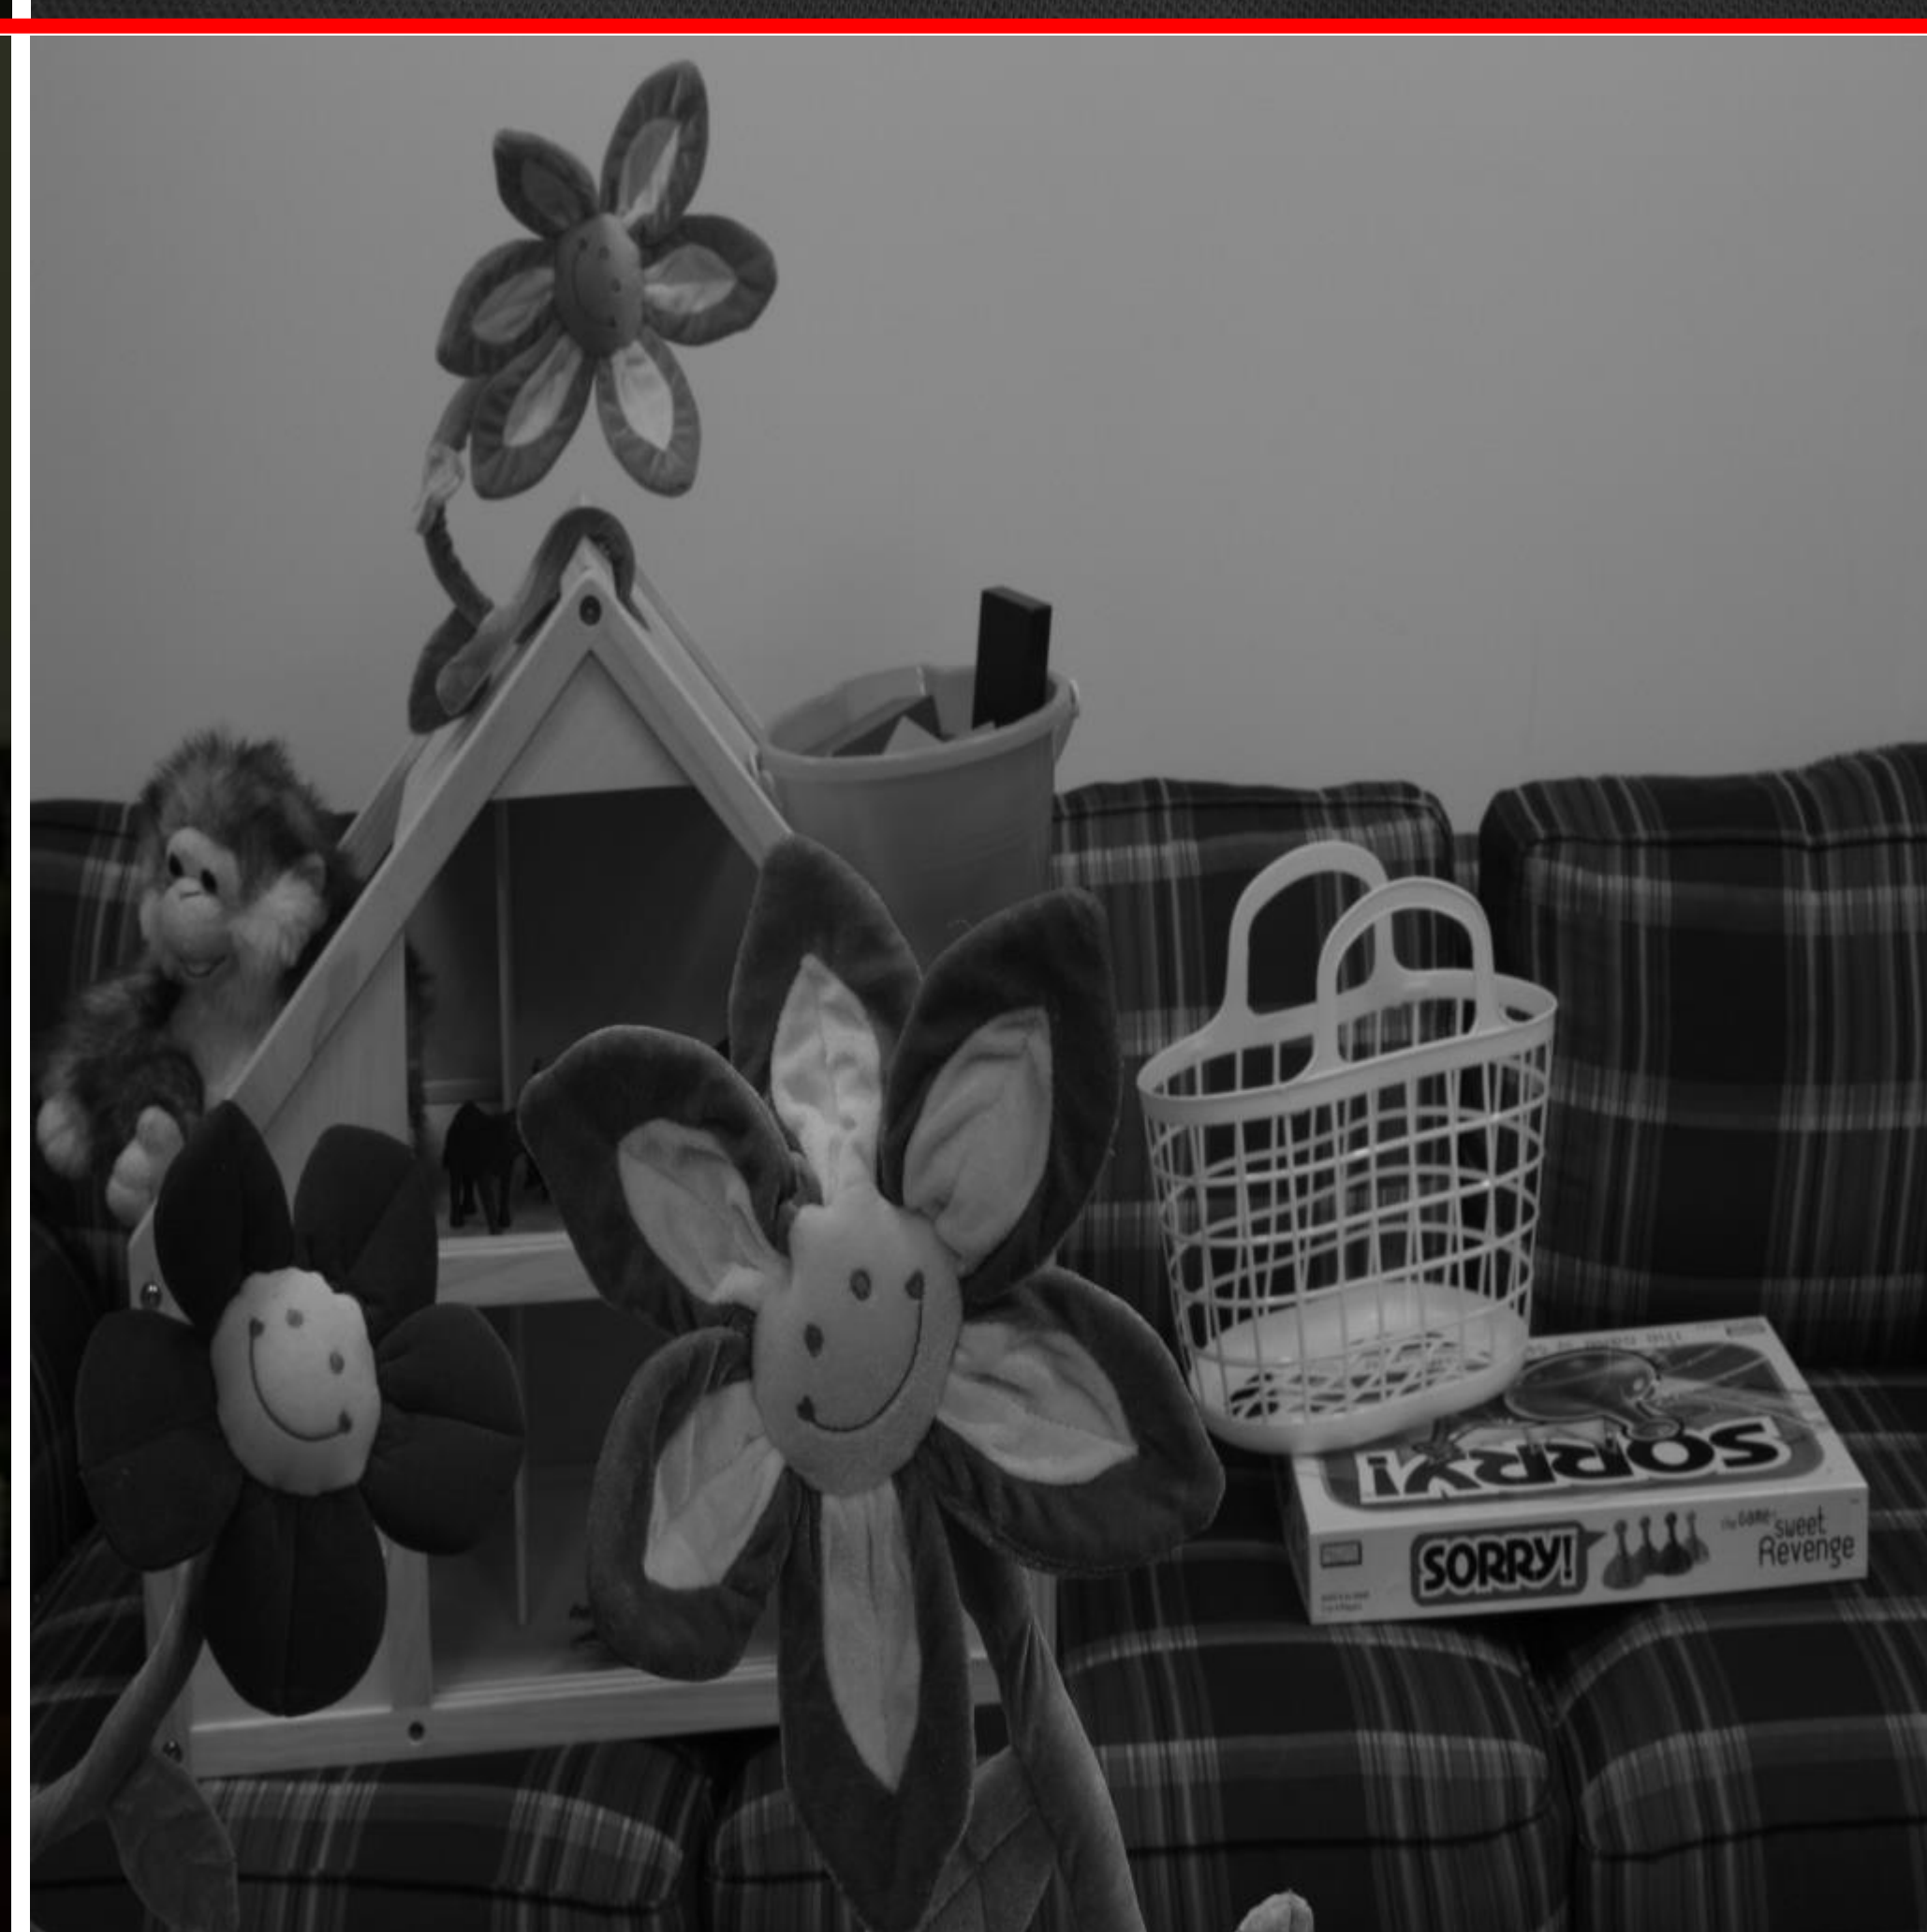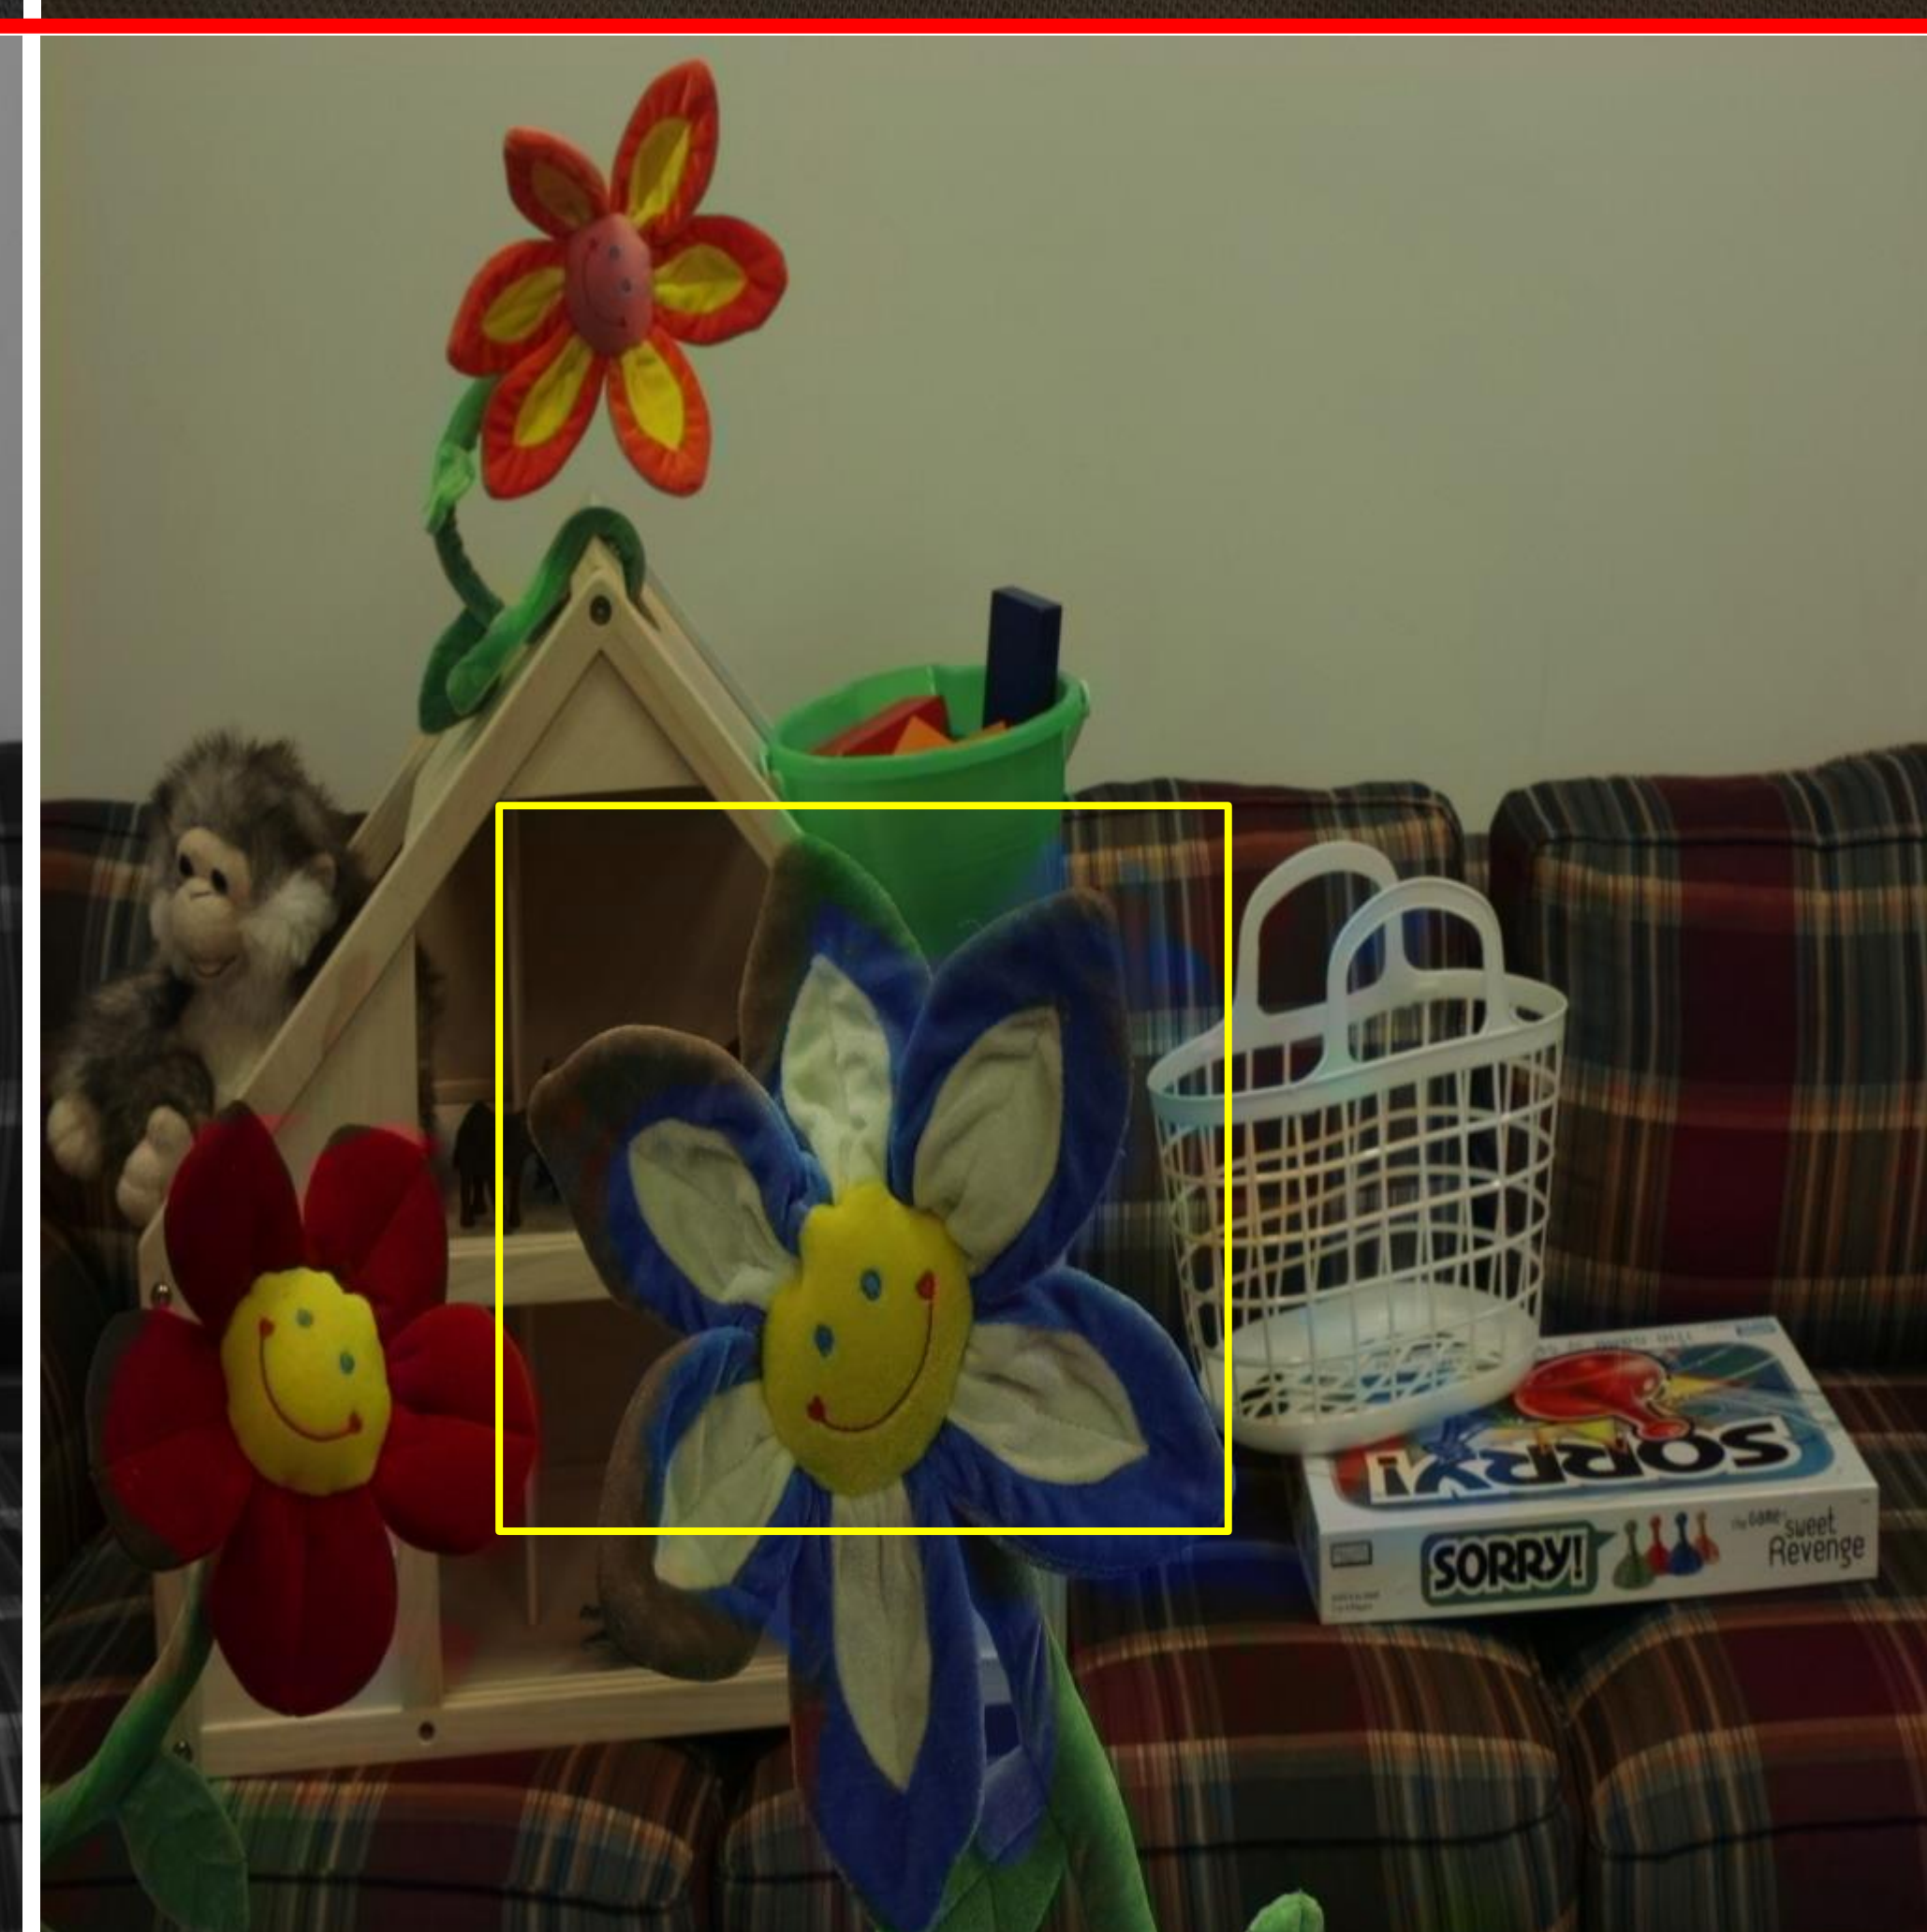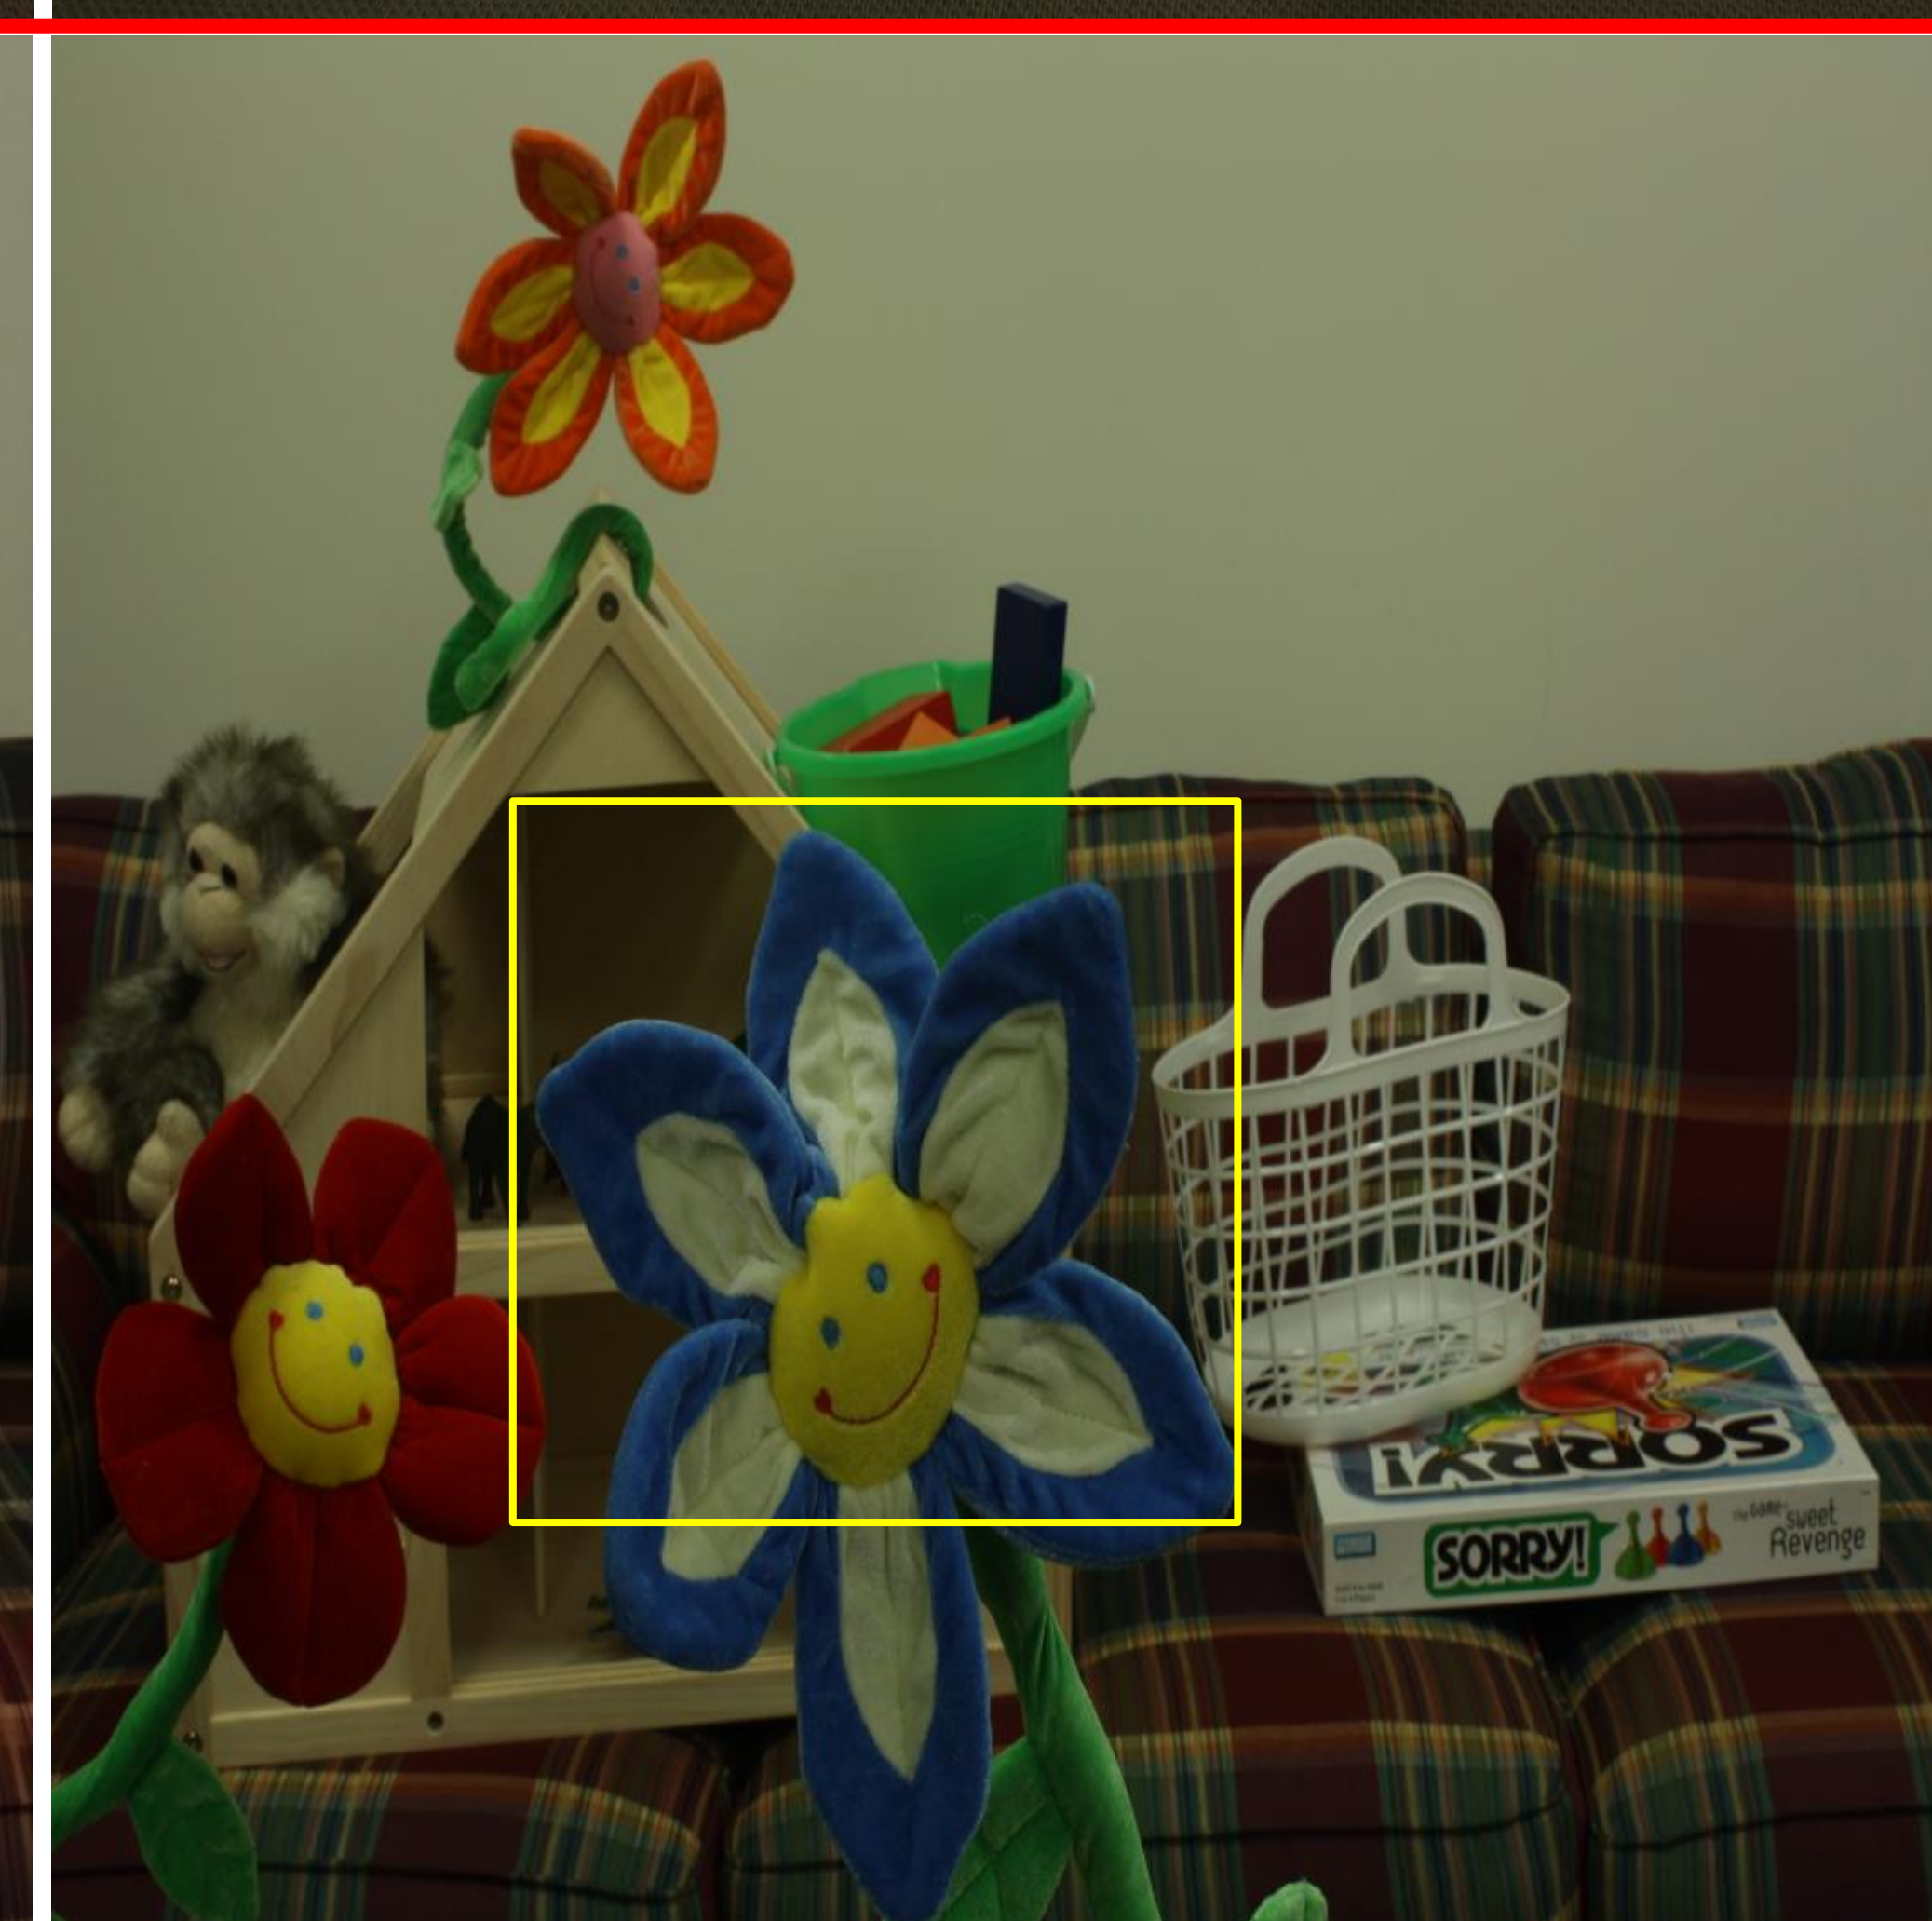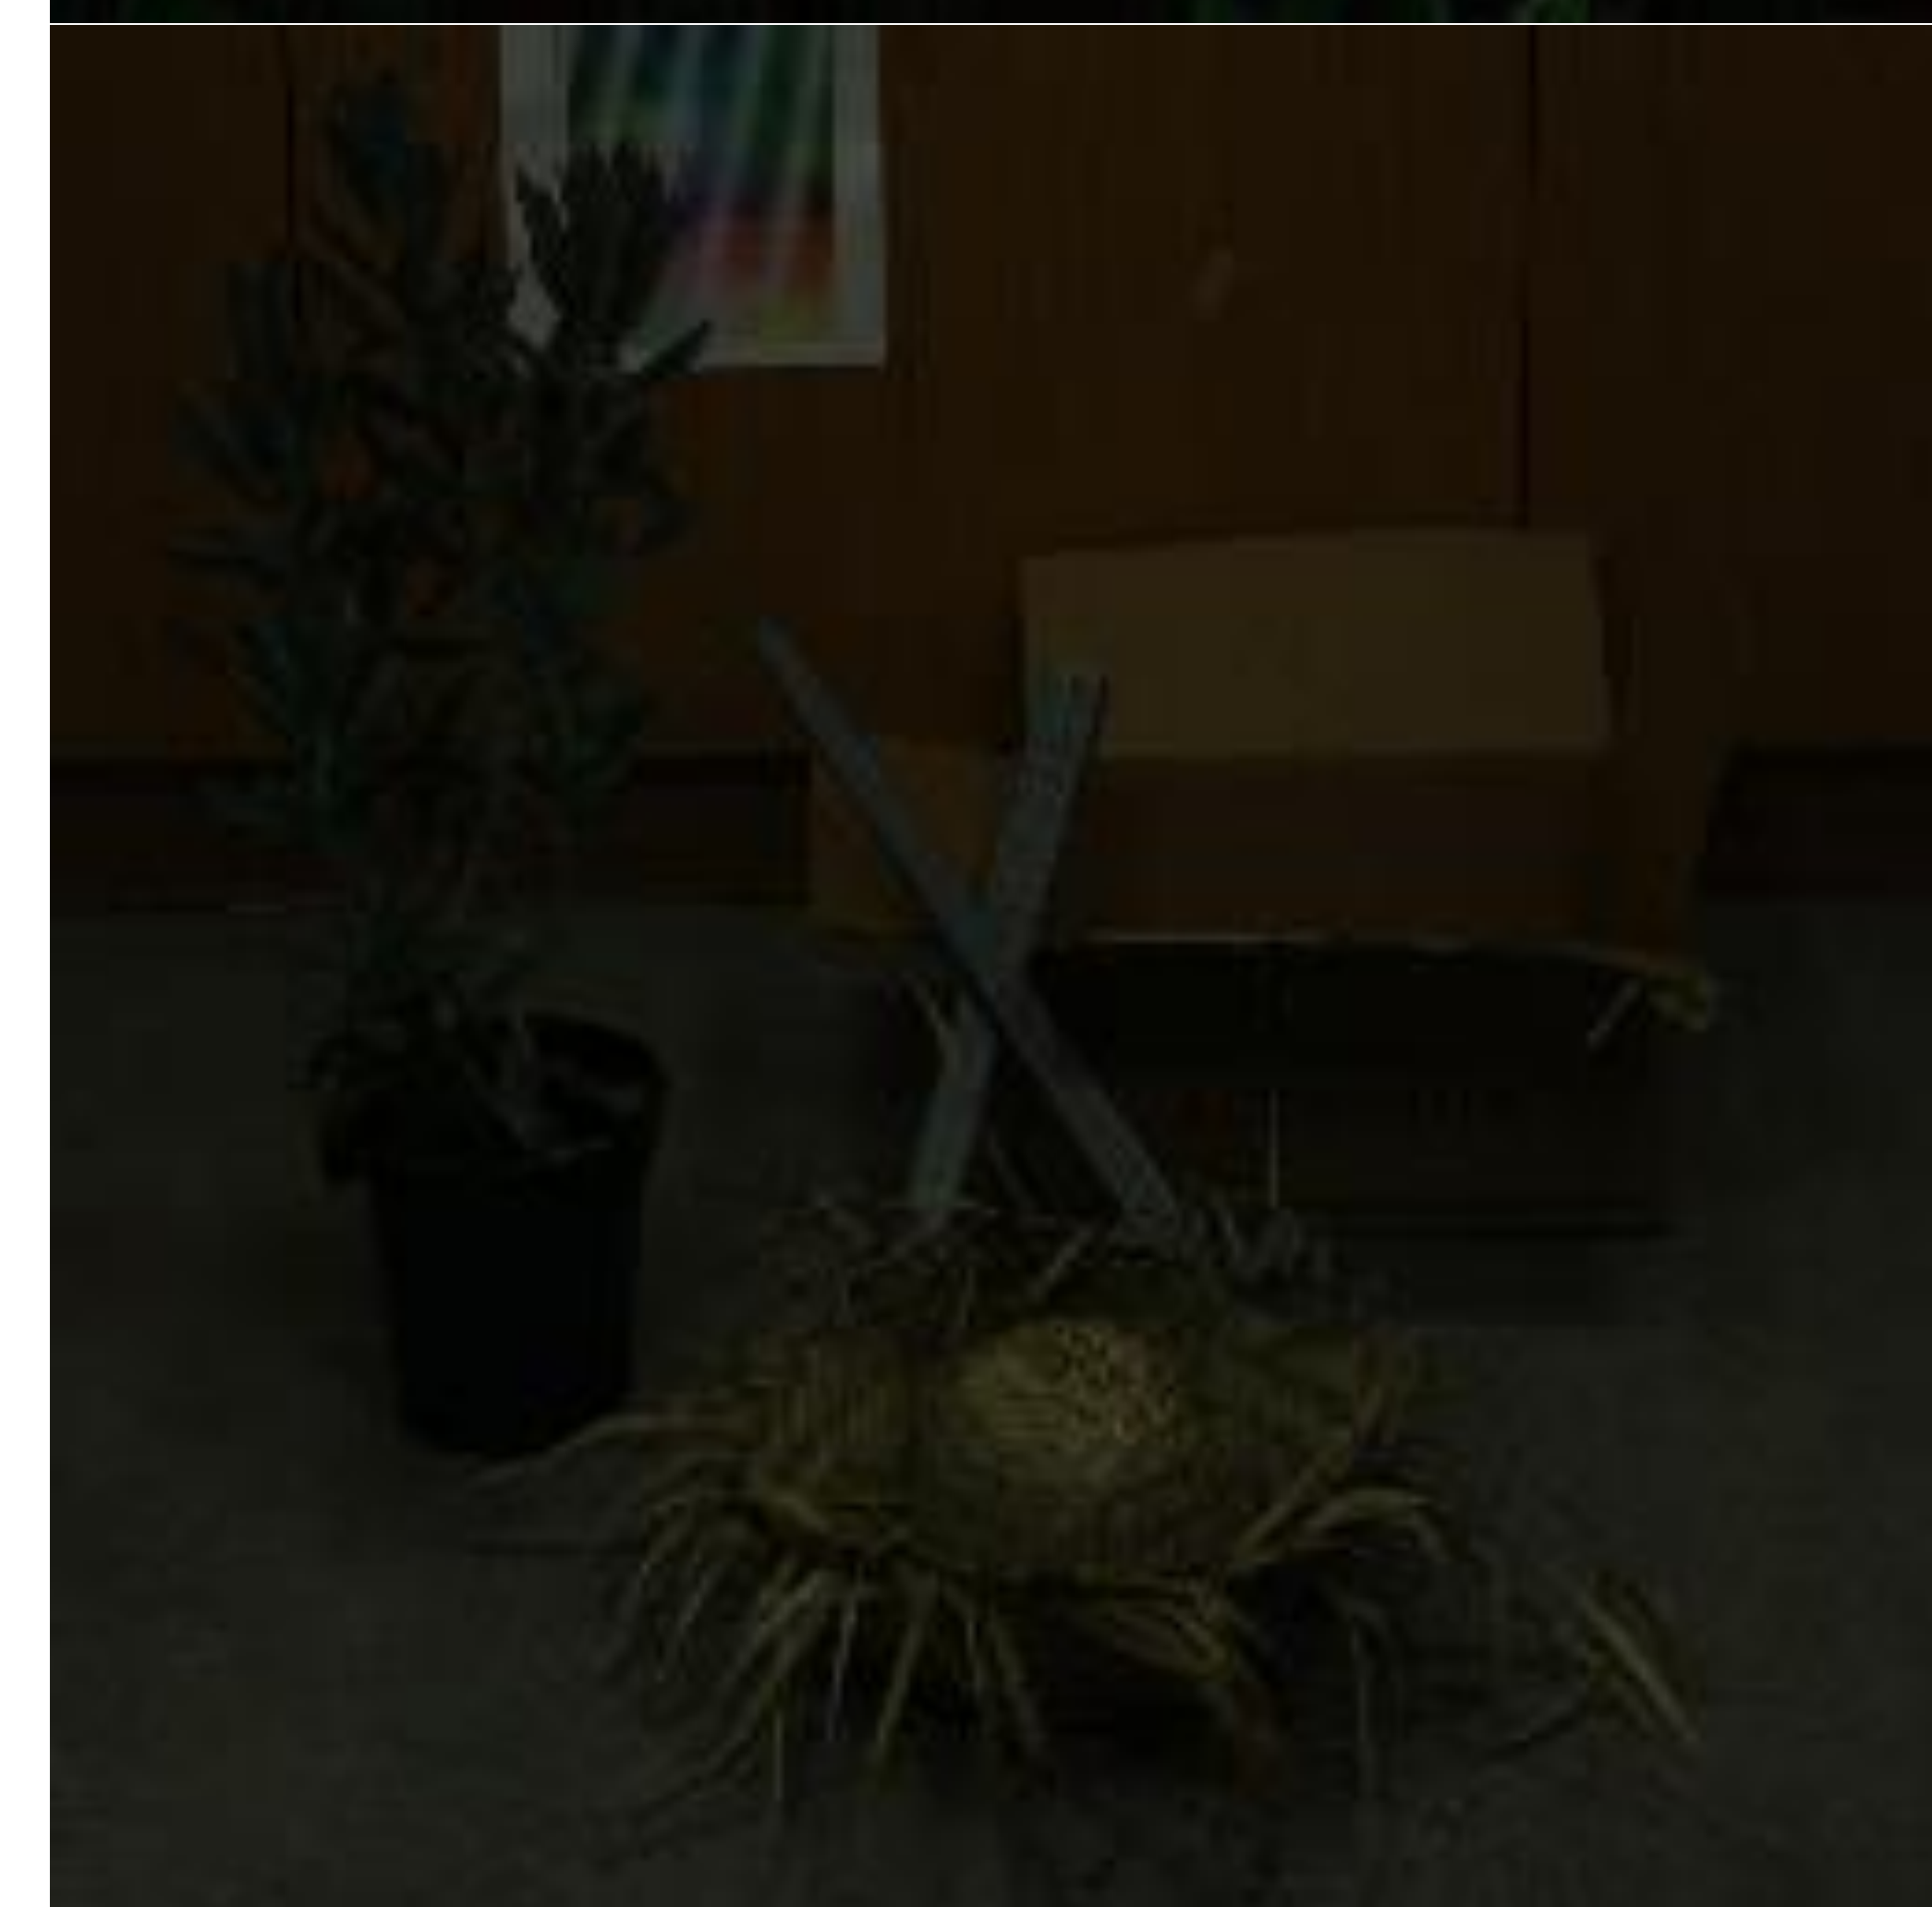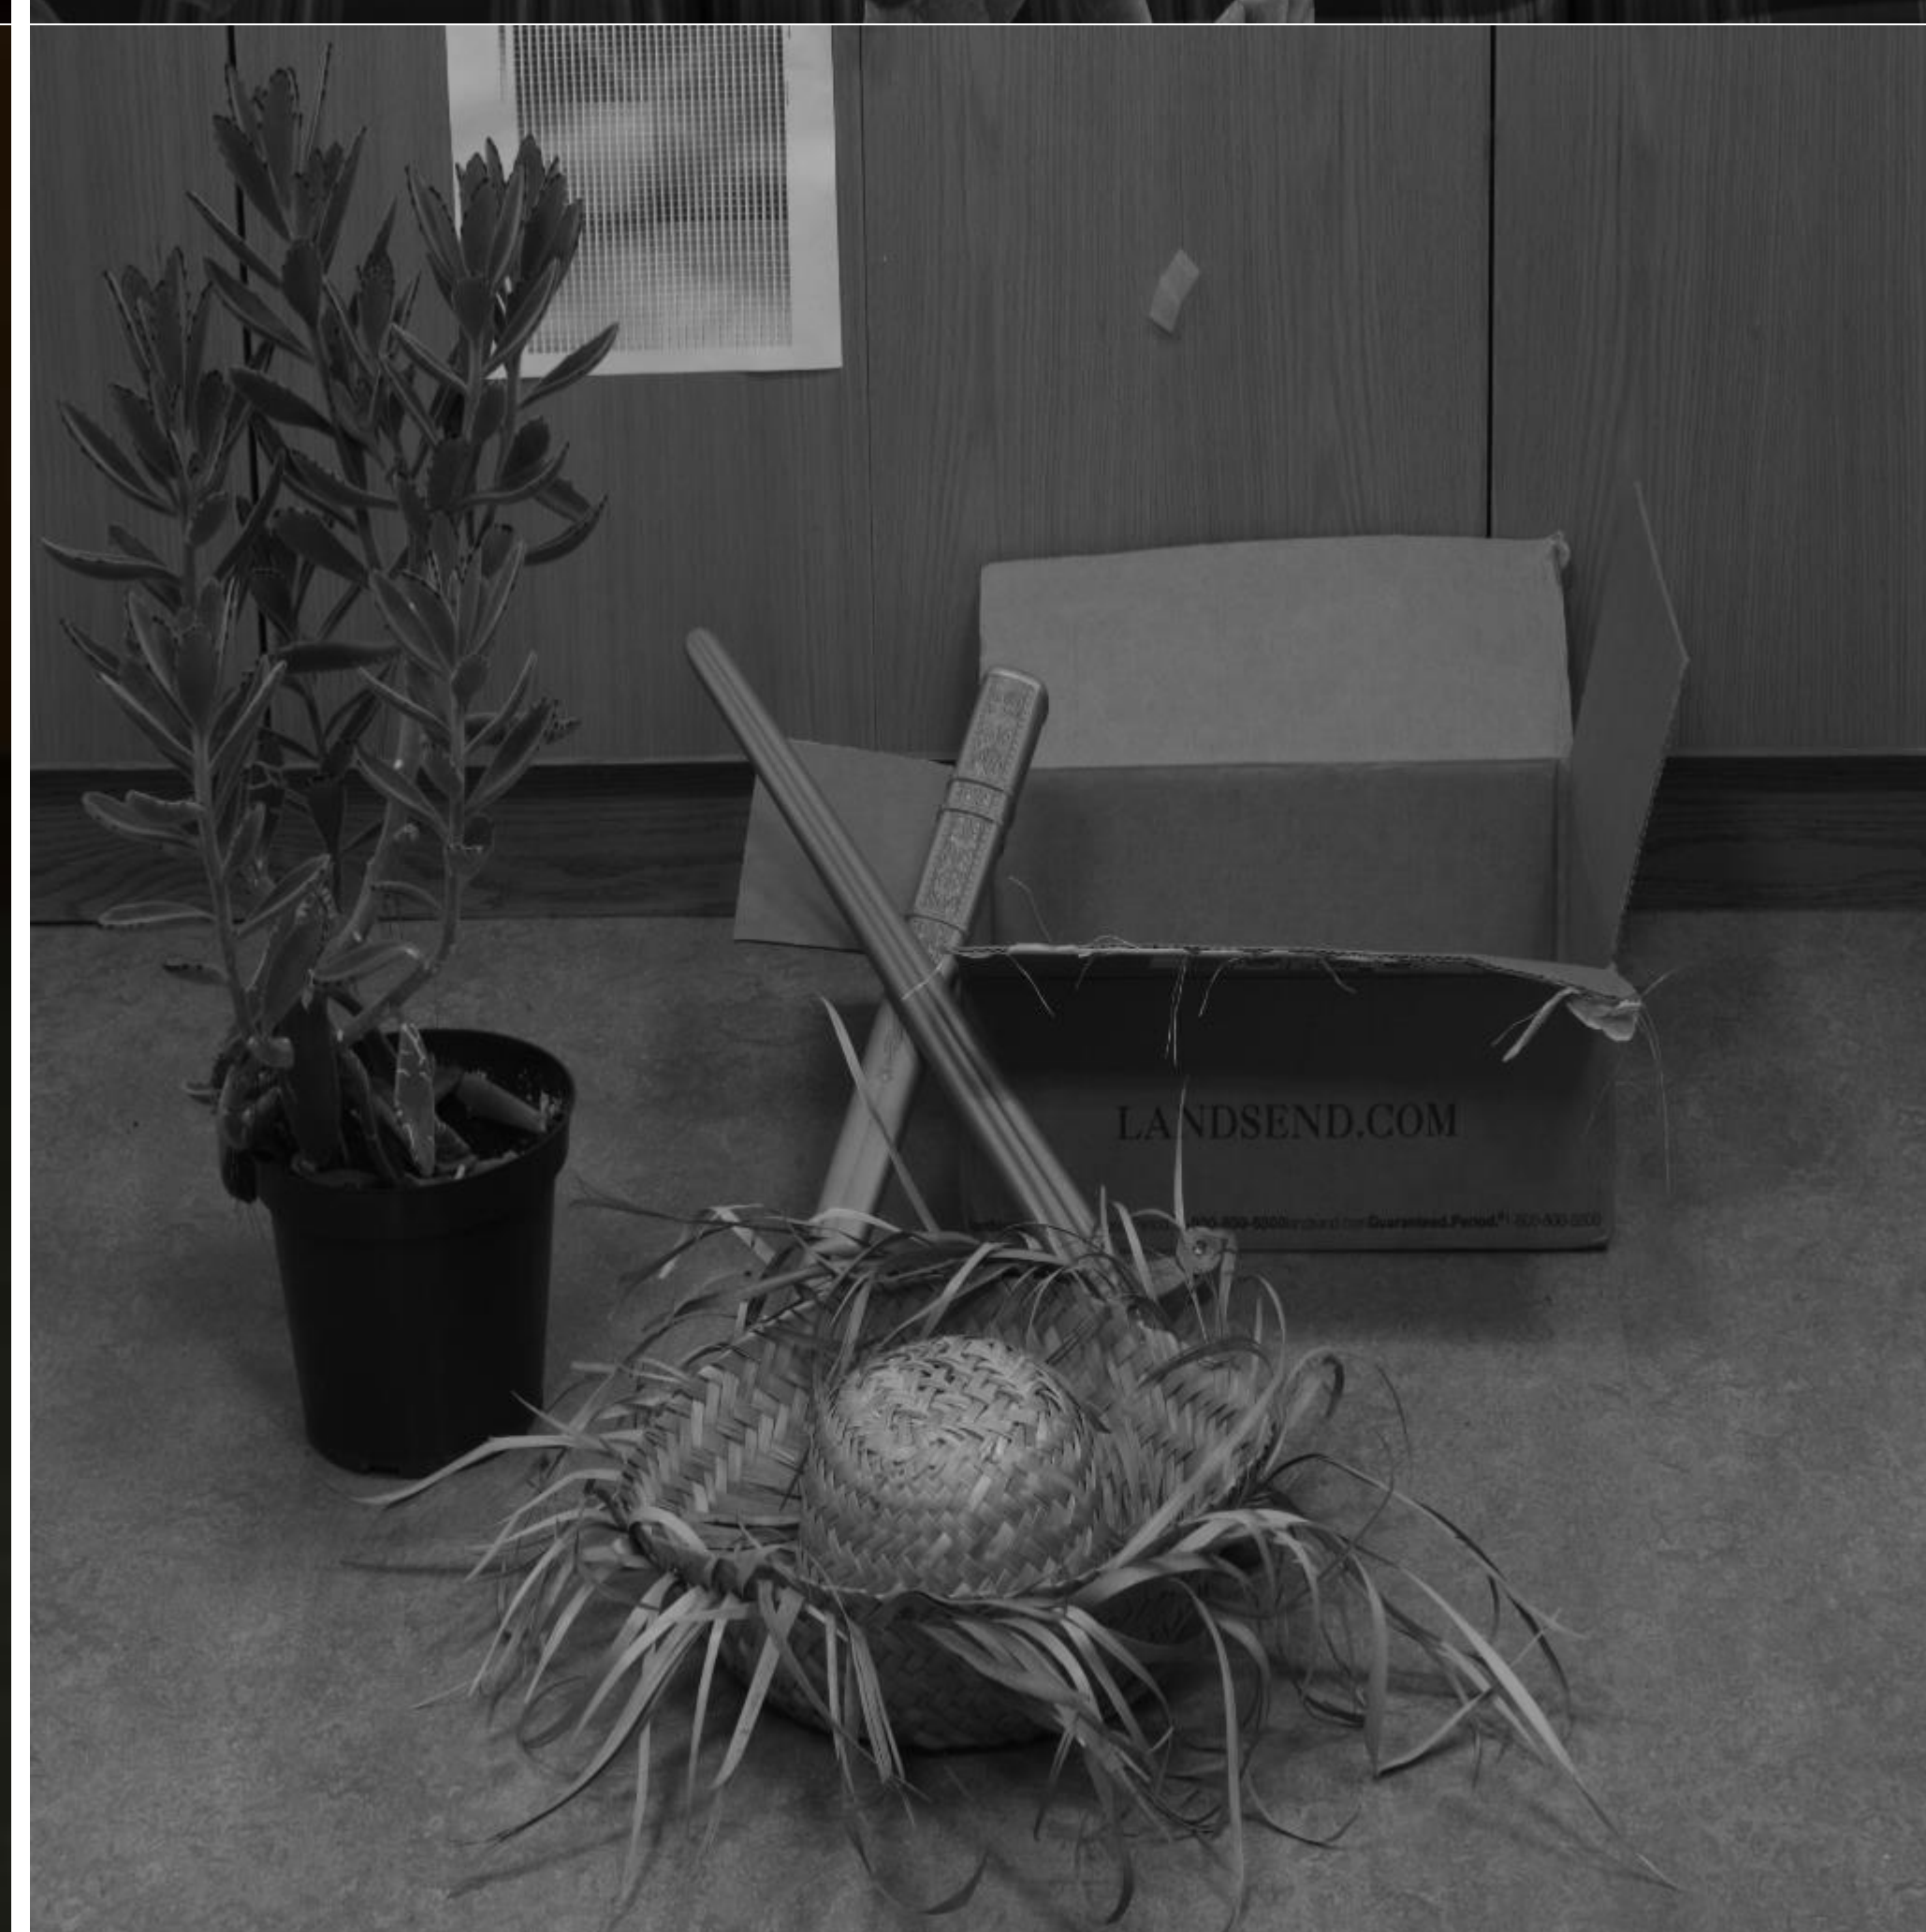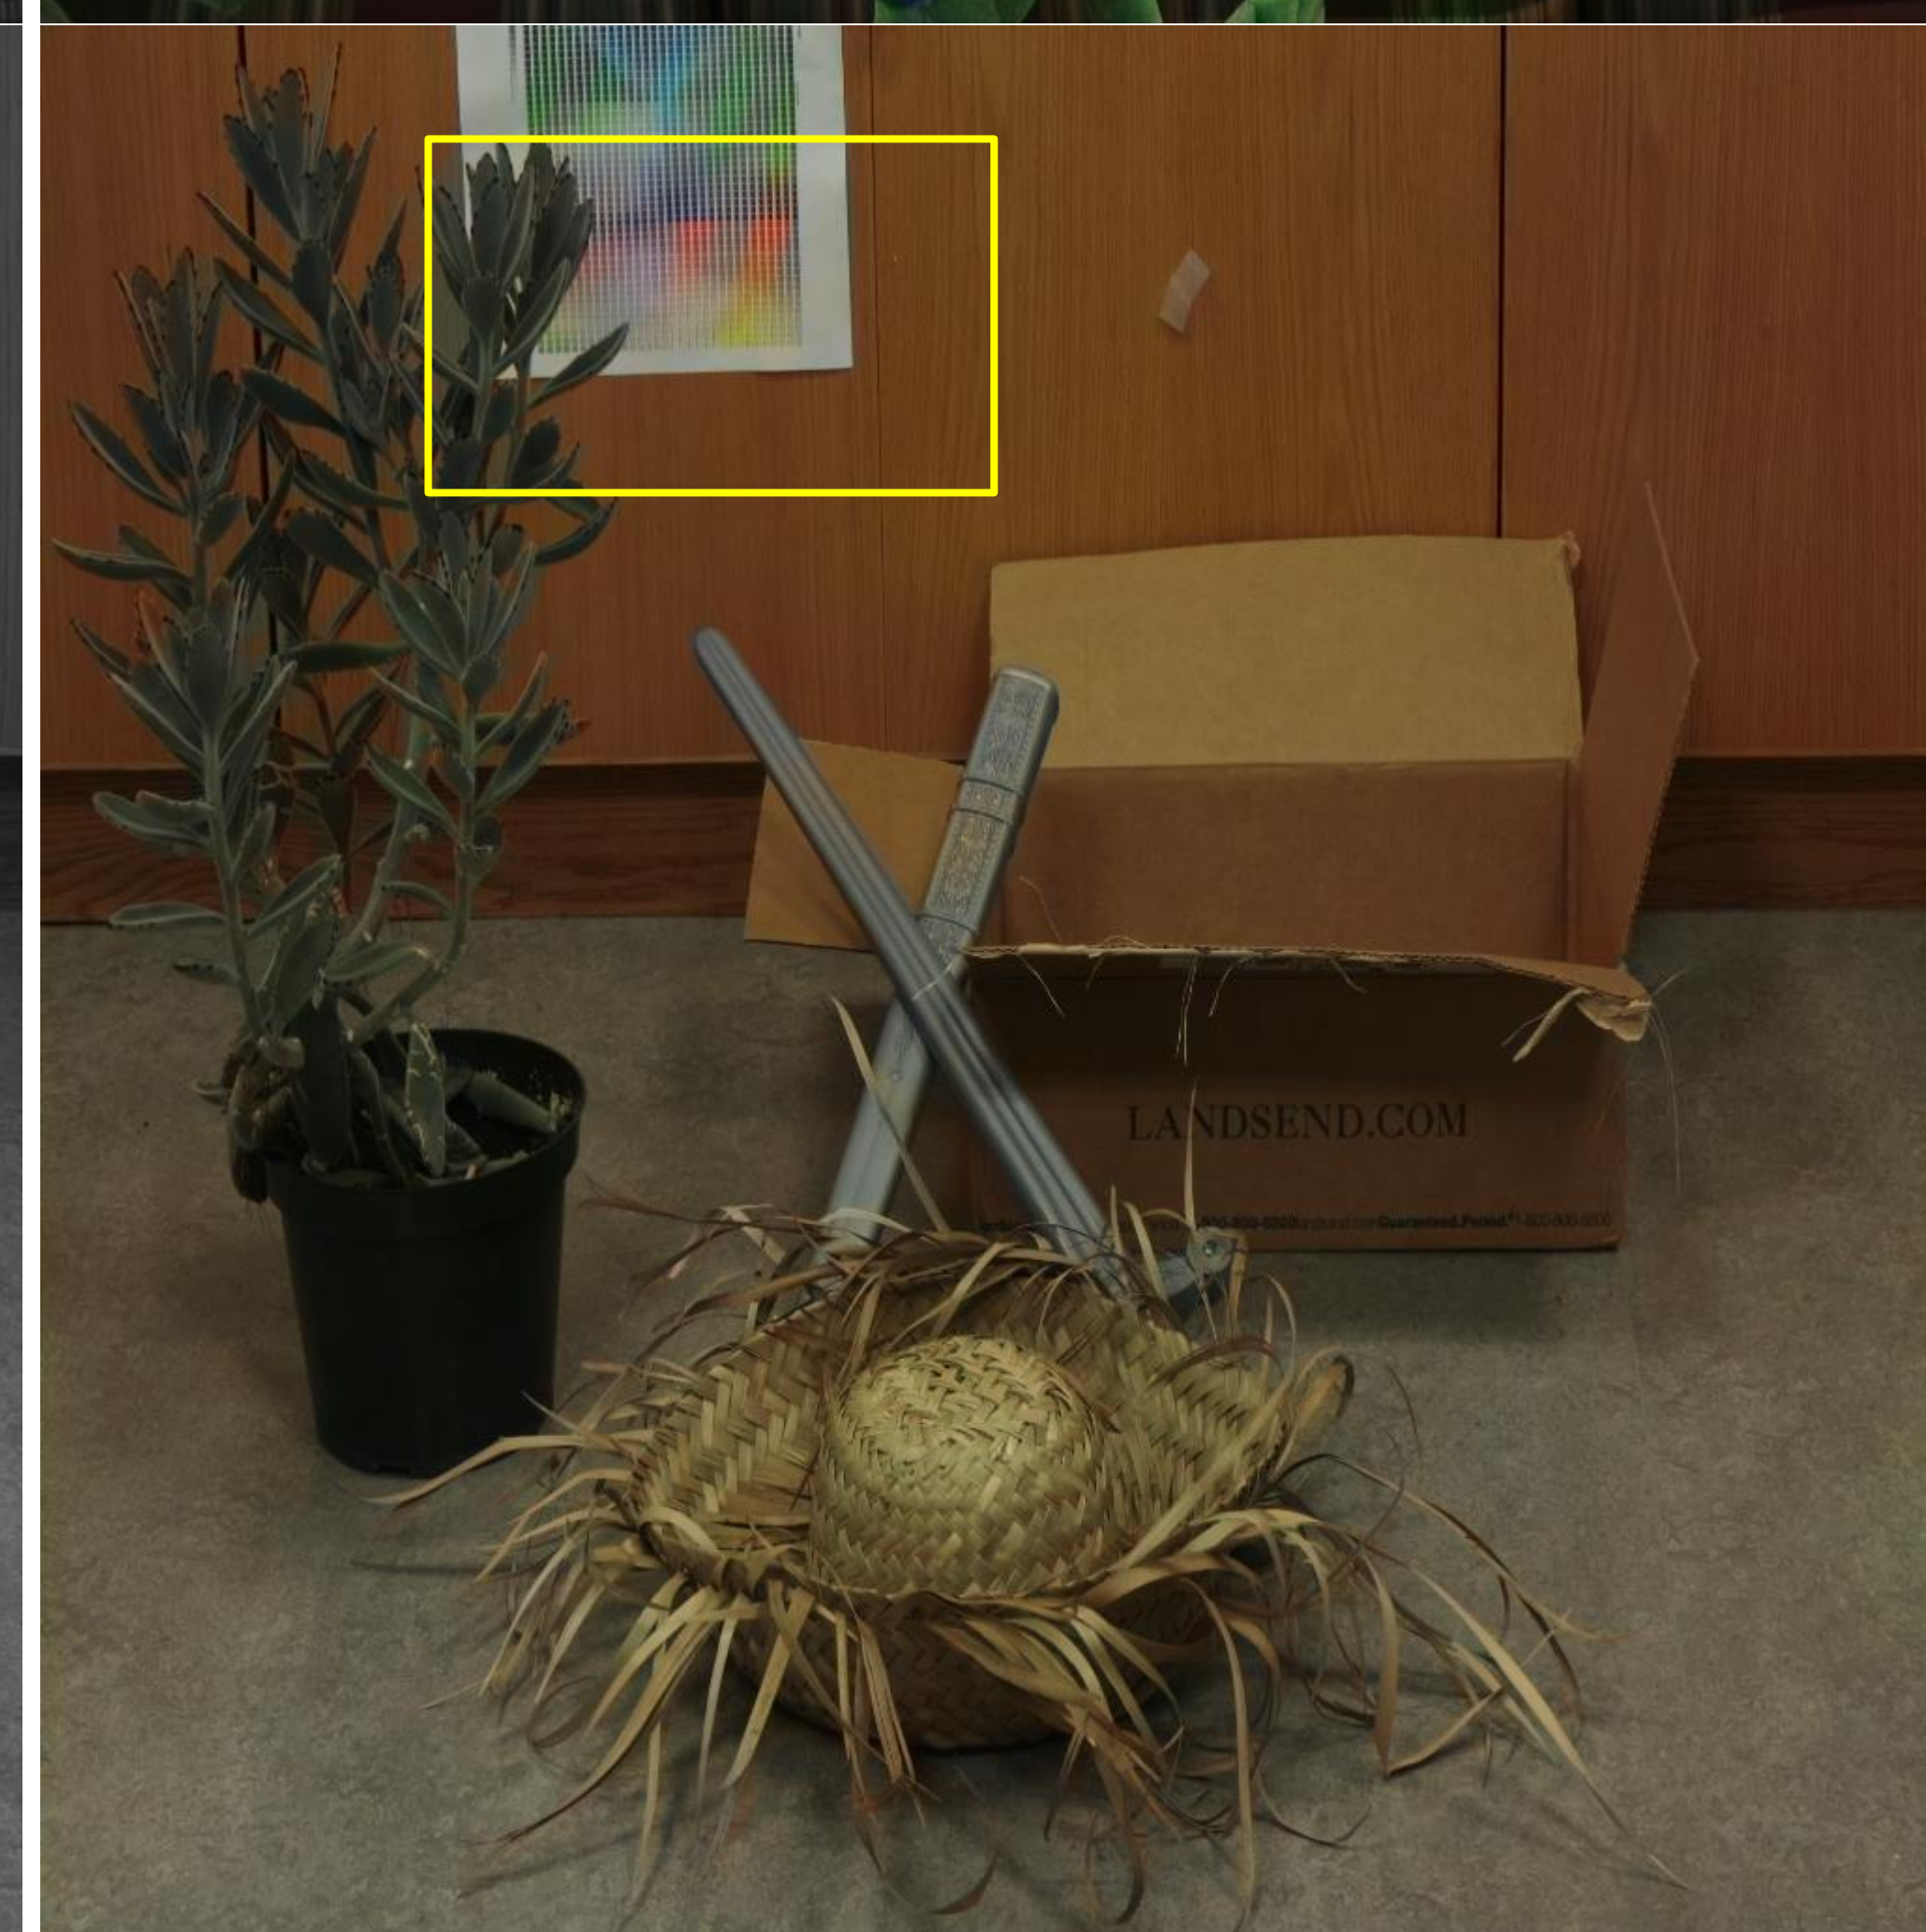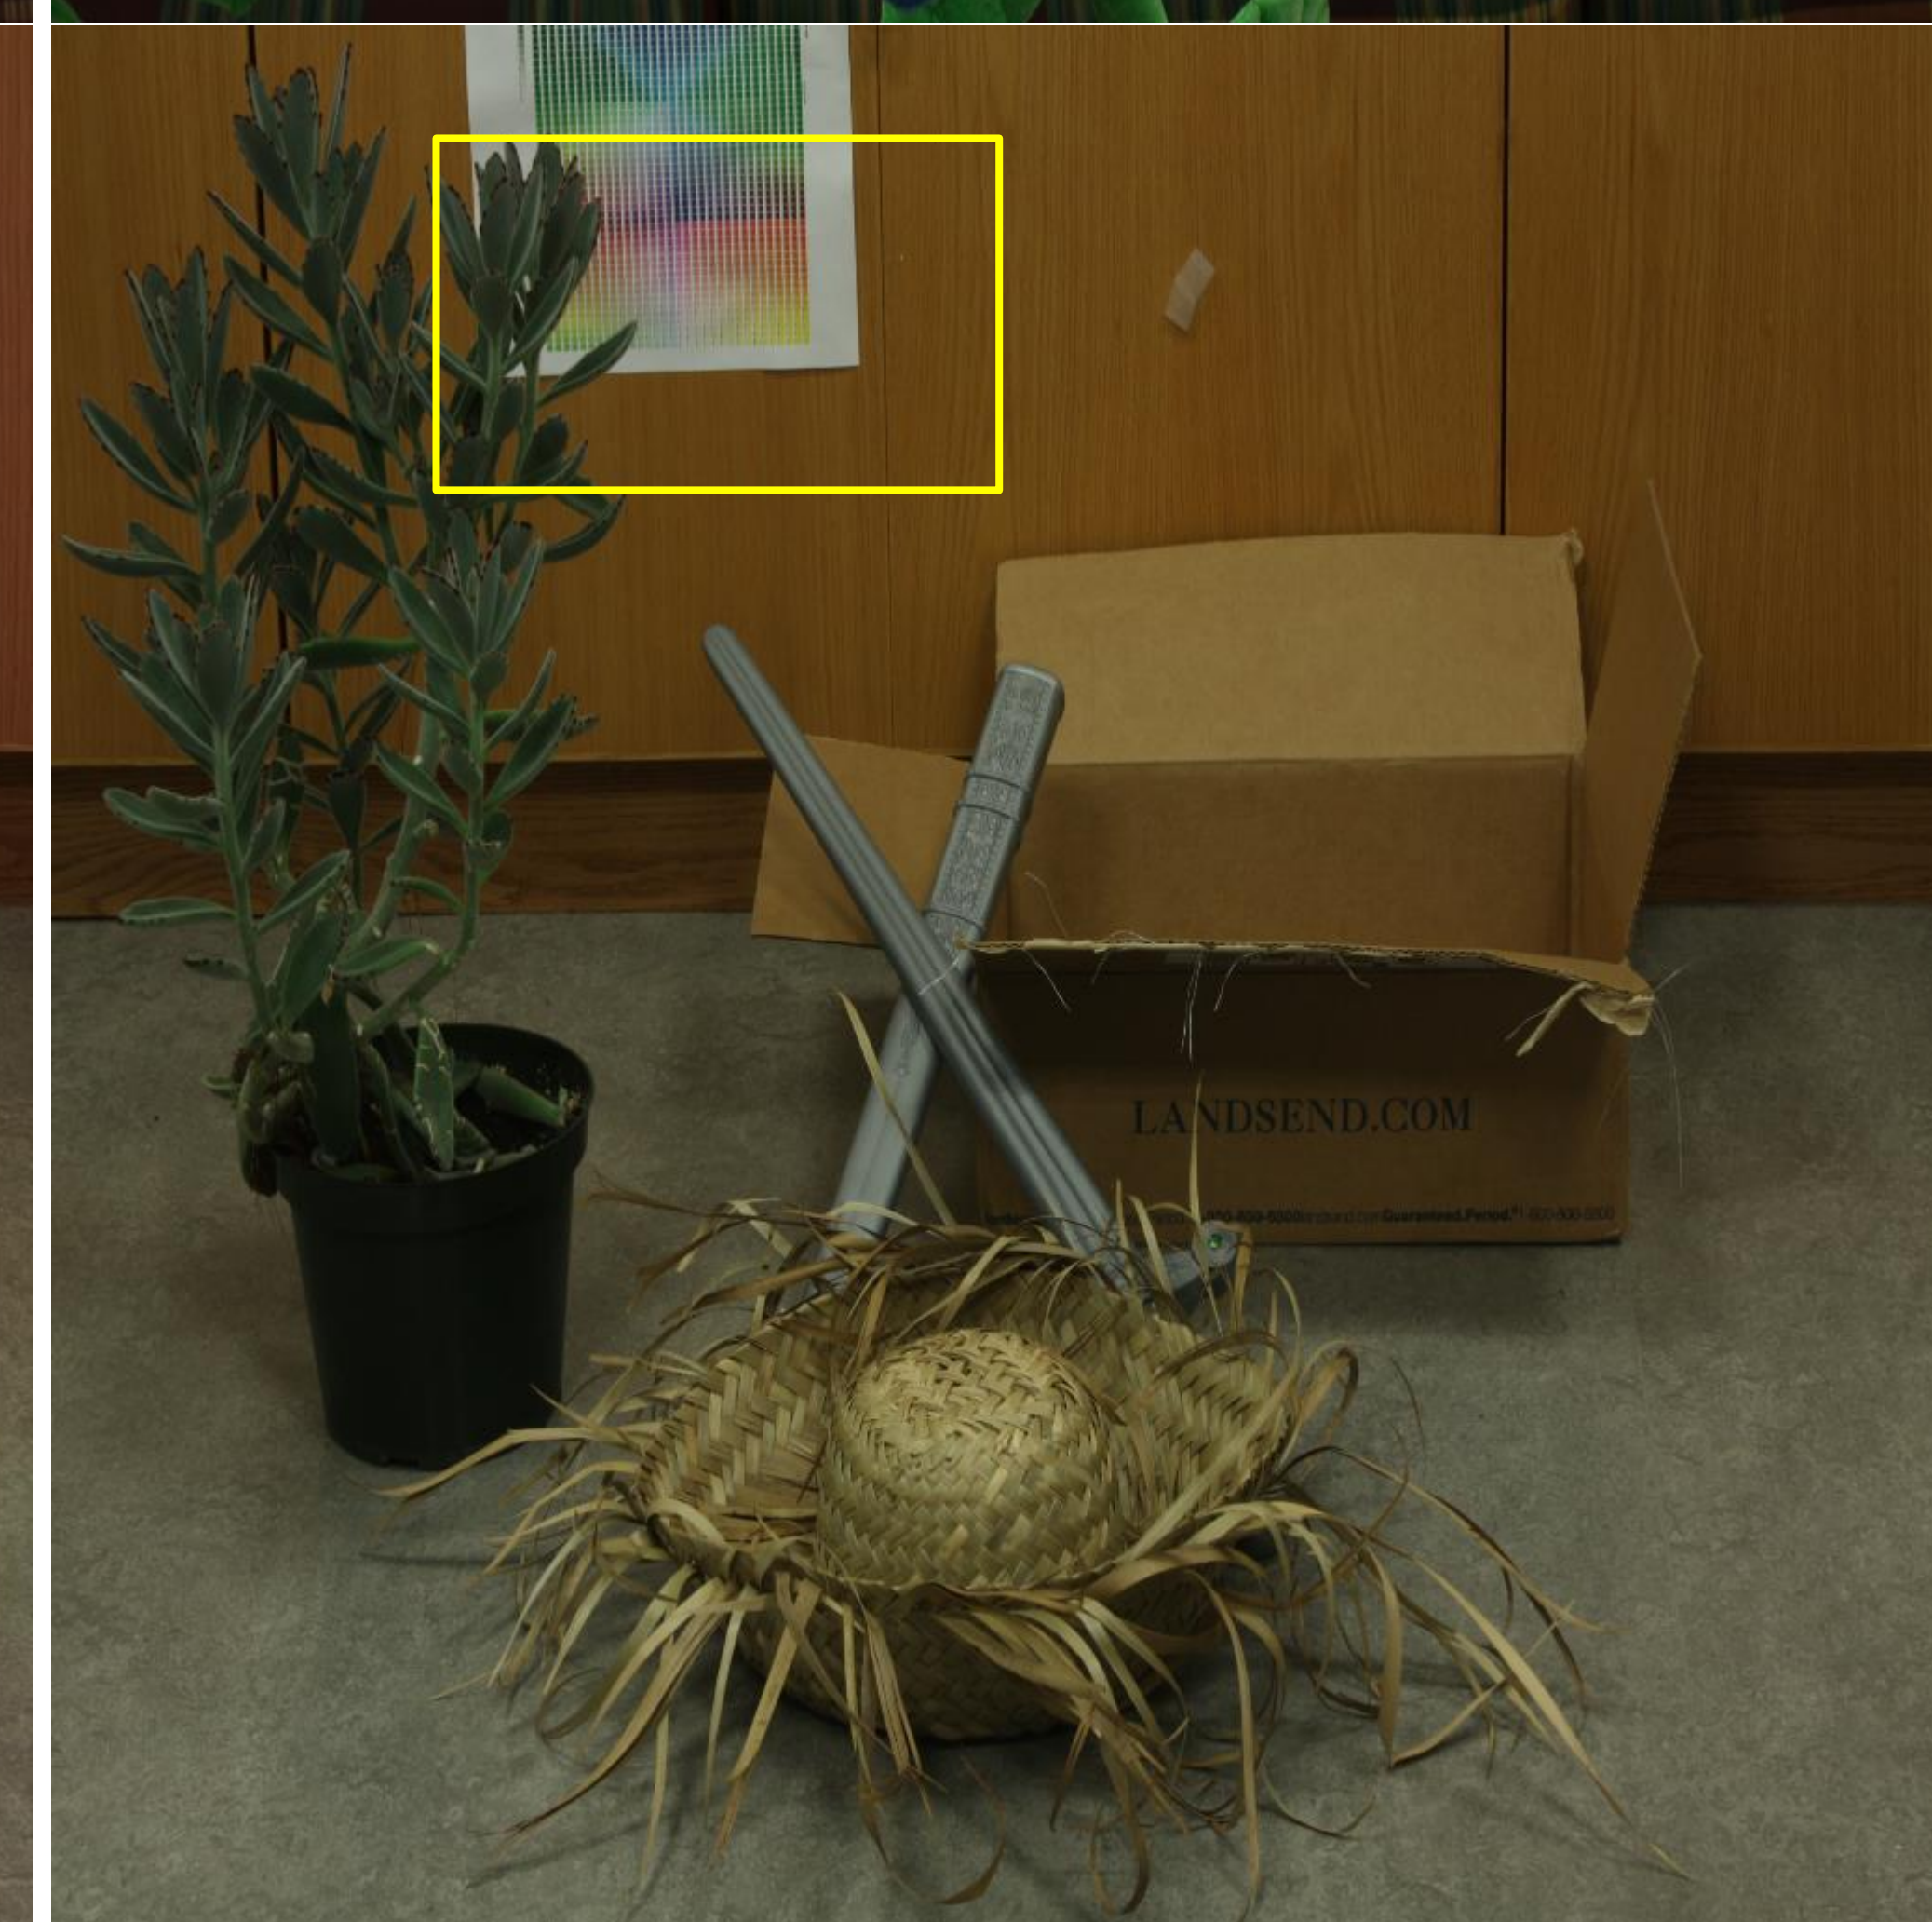

Supplement: Supplementary file 21 [file Guo_Low-light_Color_Imaging_ACCV_2020_supplemental.zip]

(a)

(b)

(c)

(d)

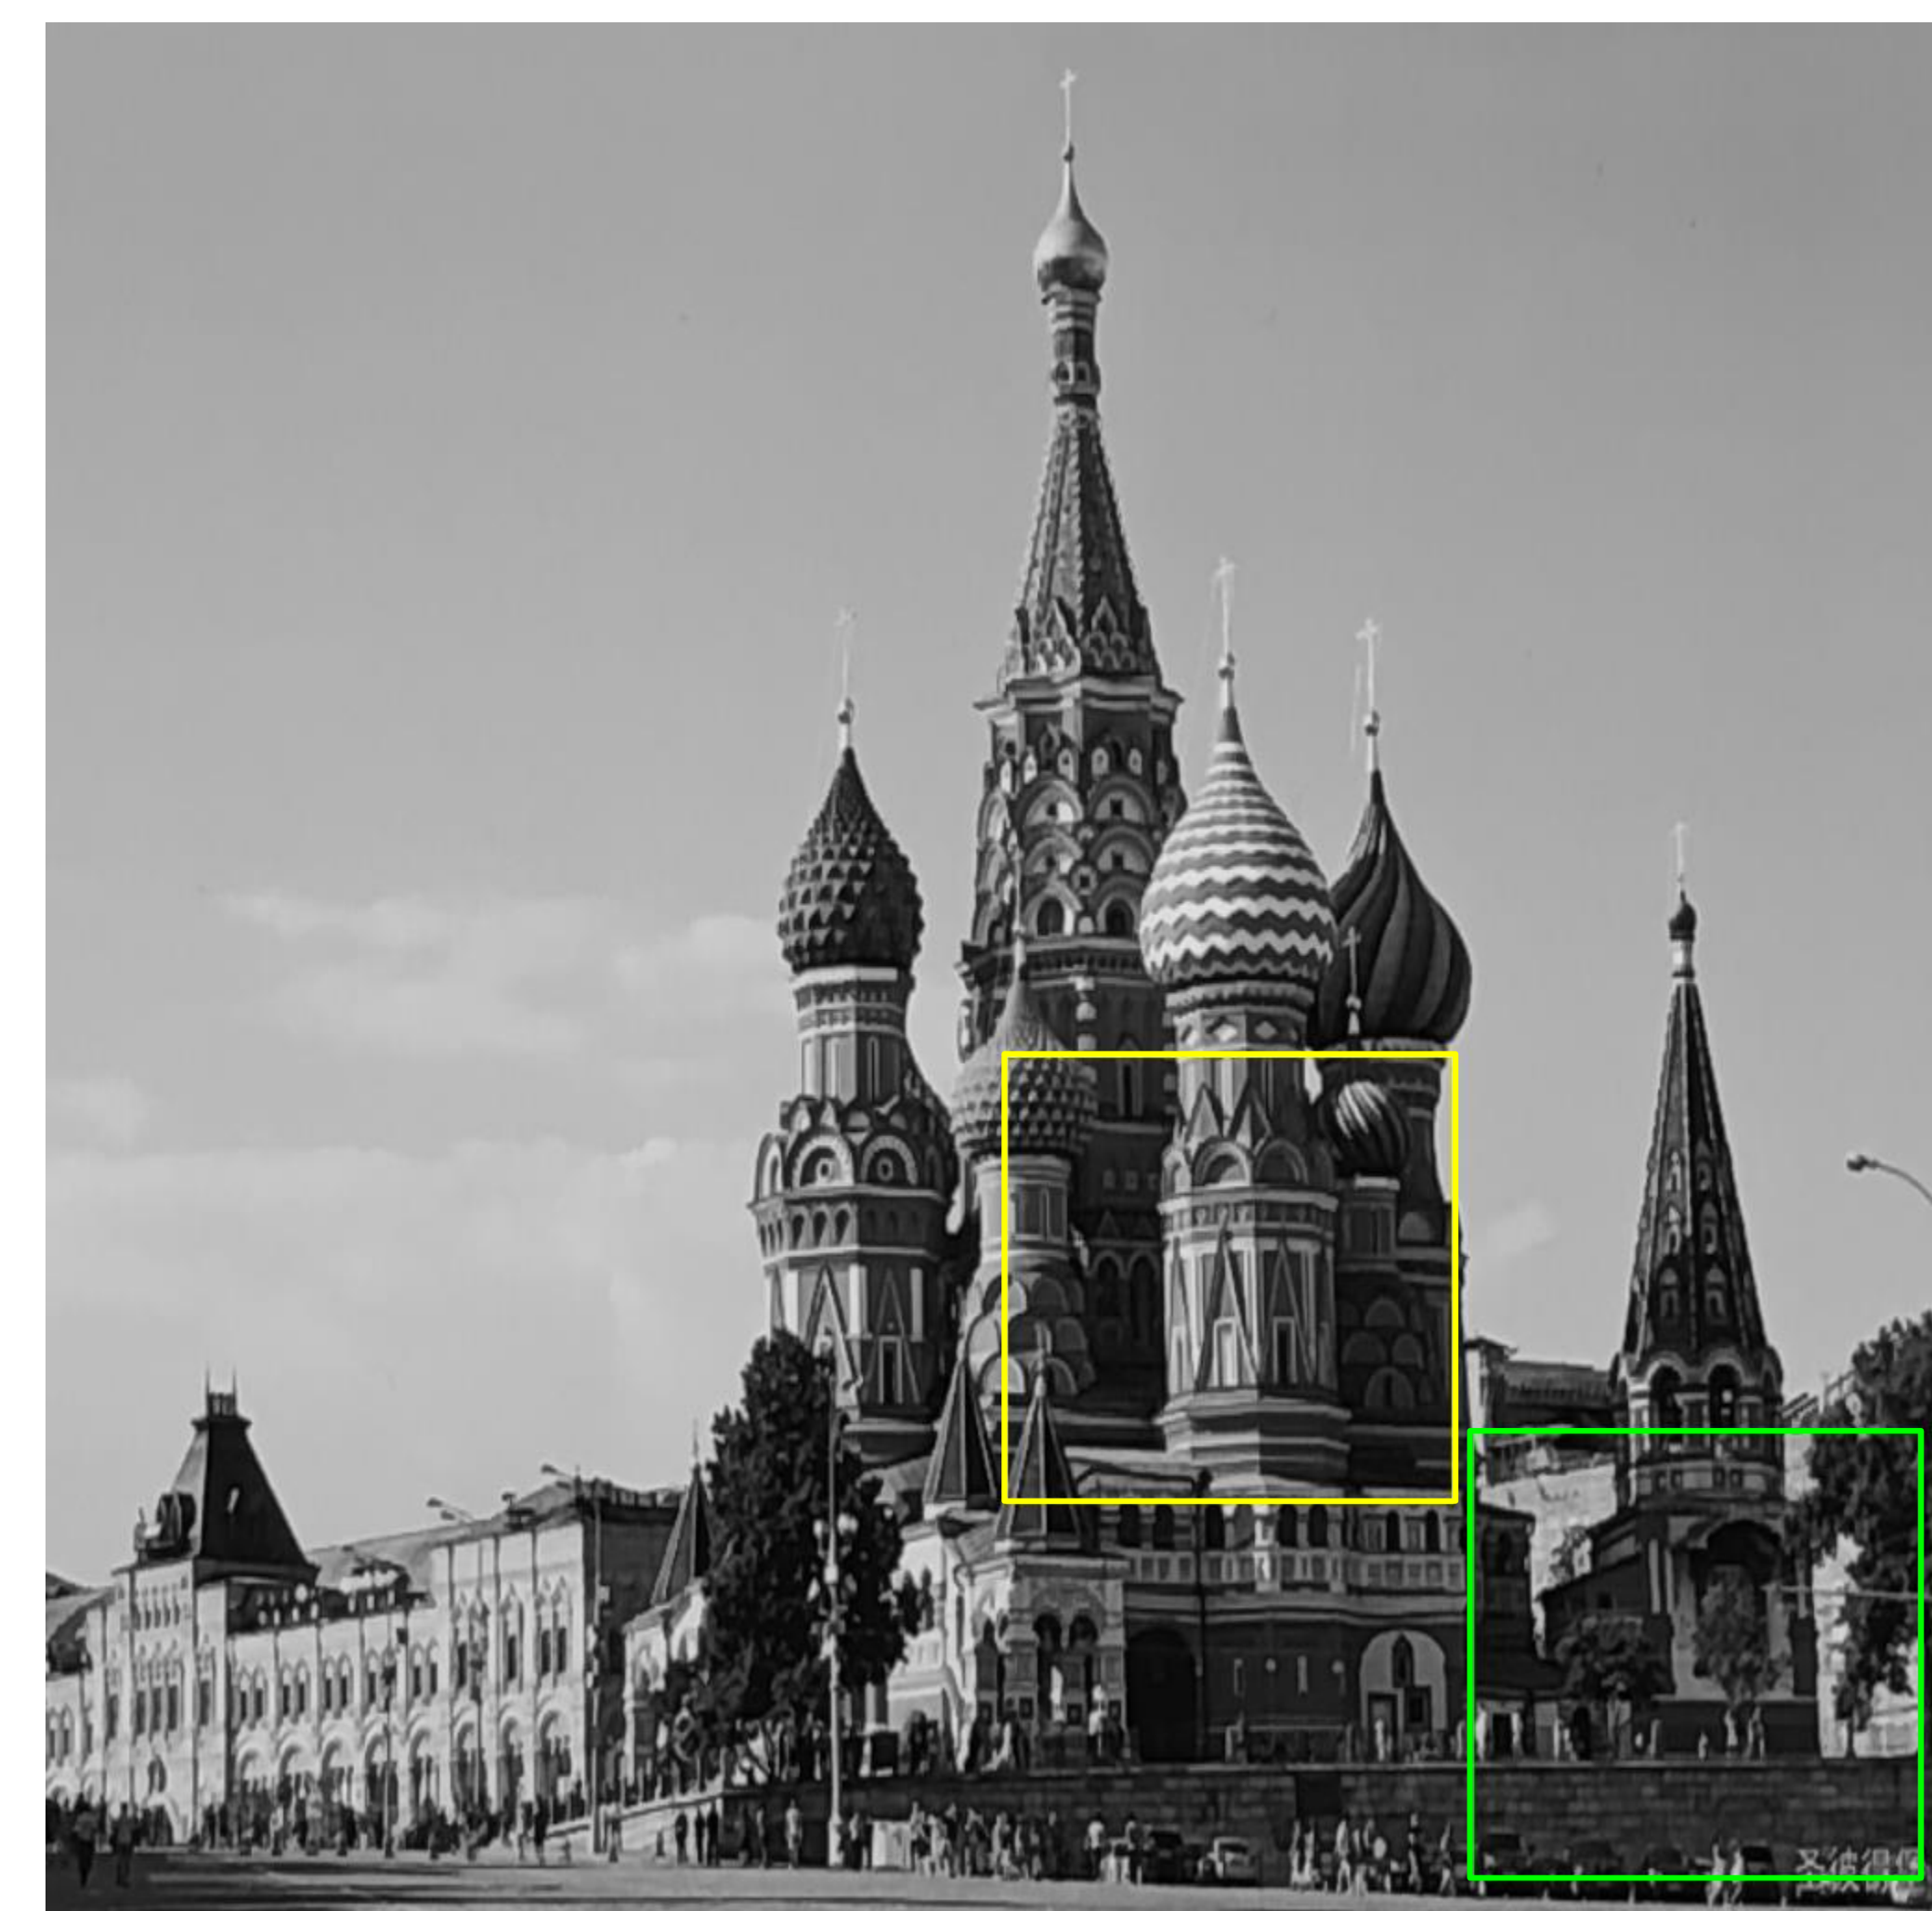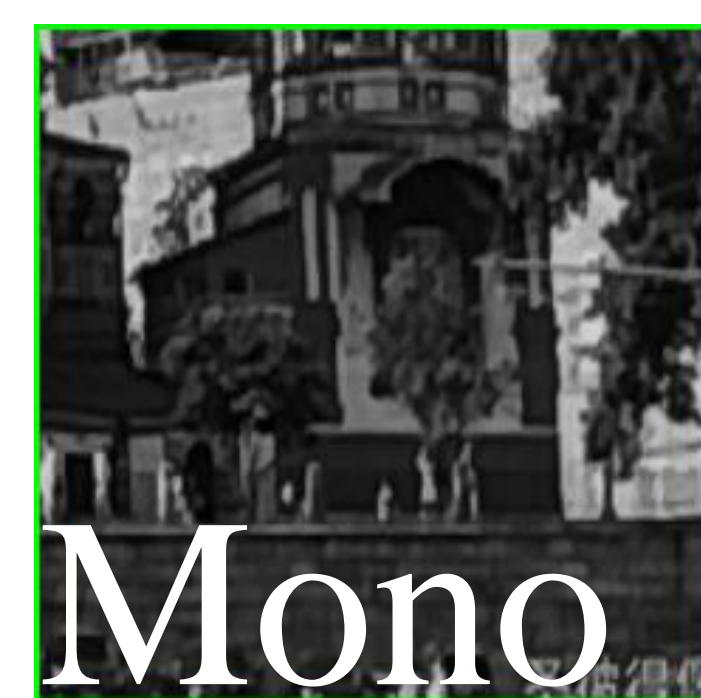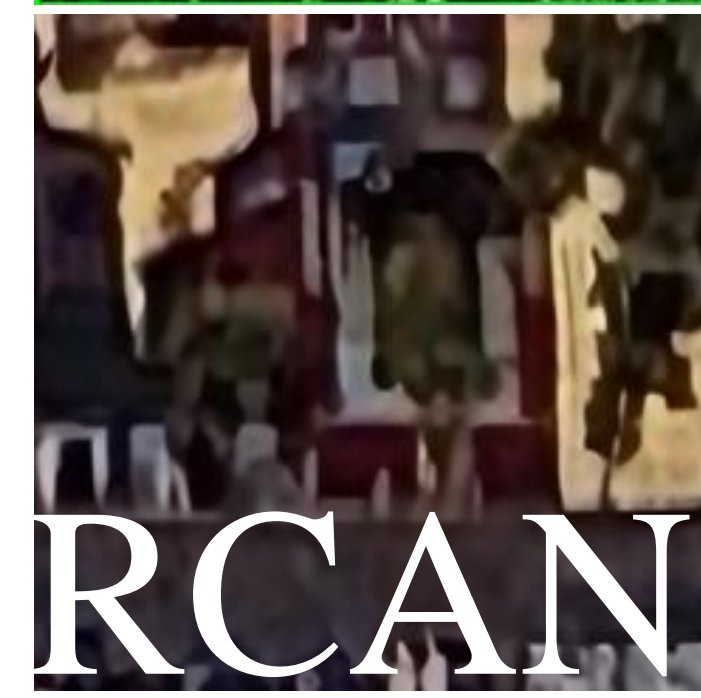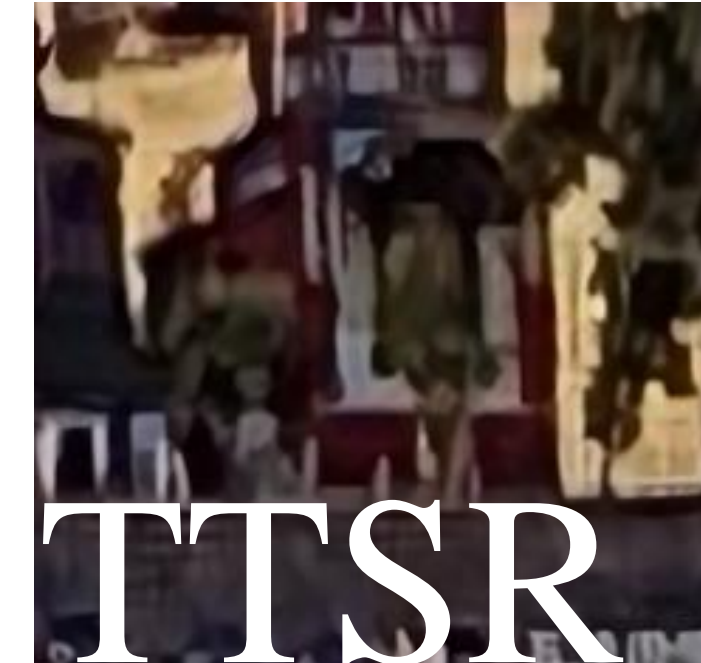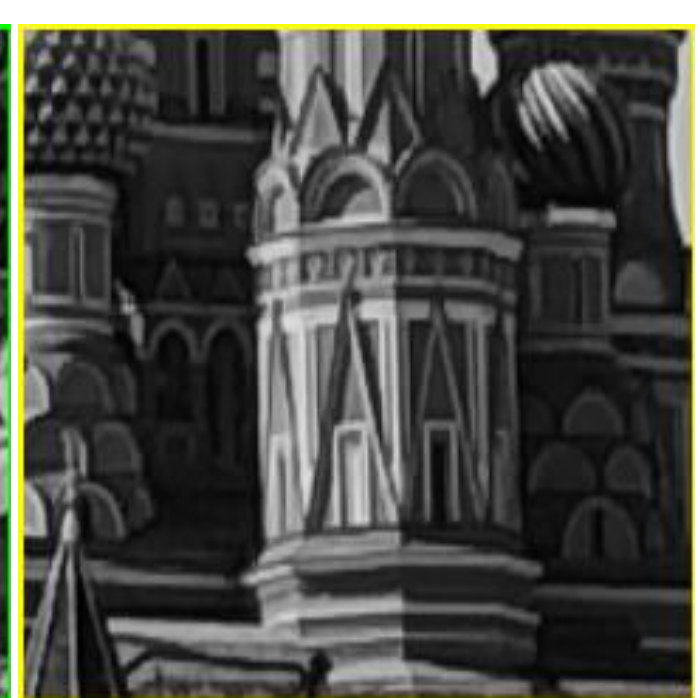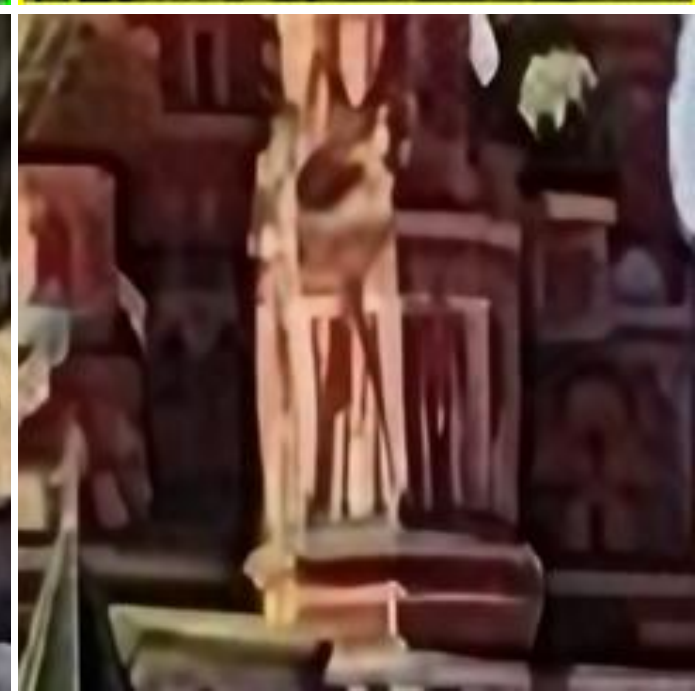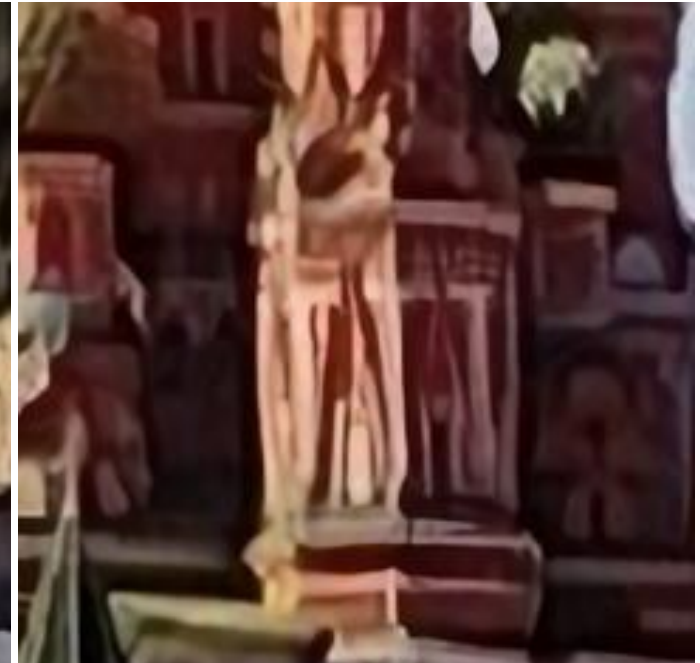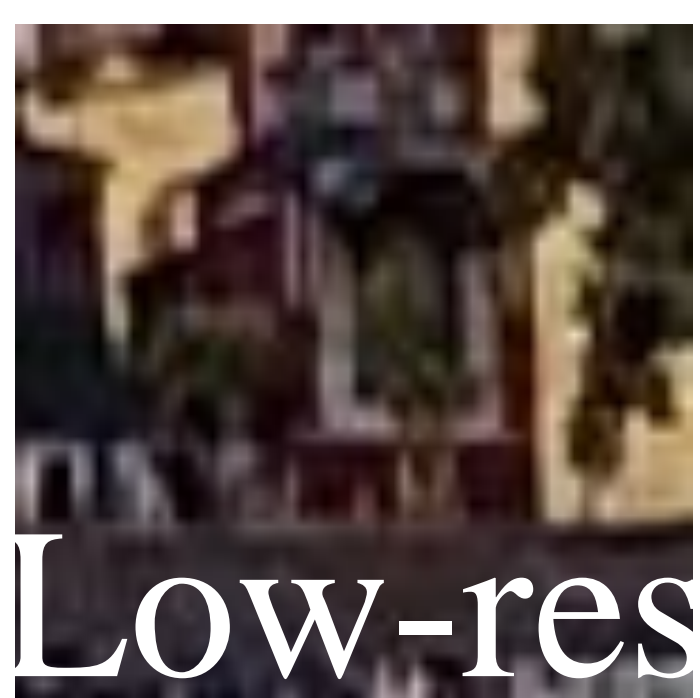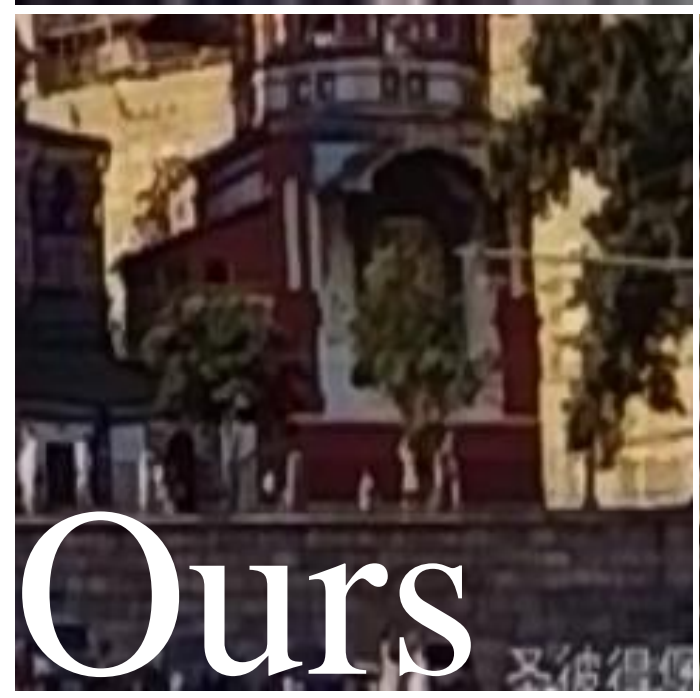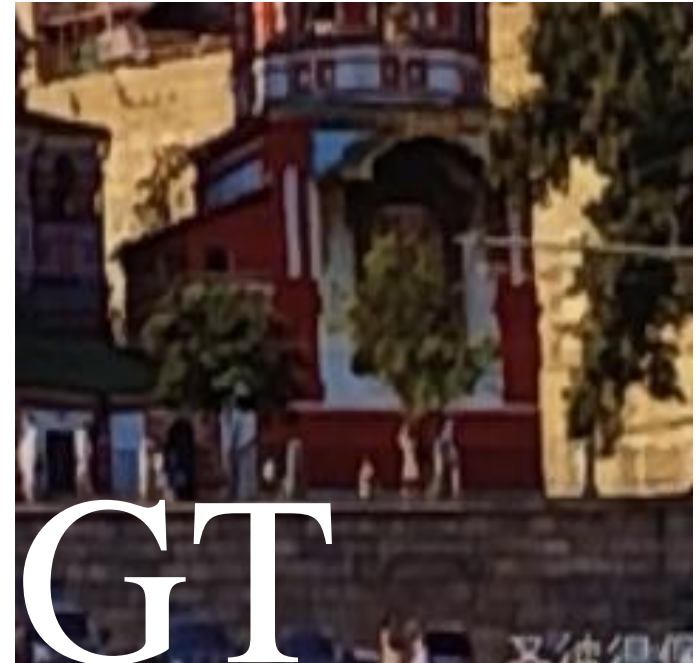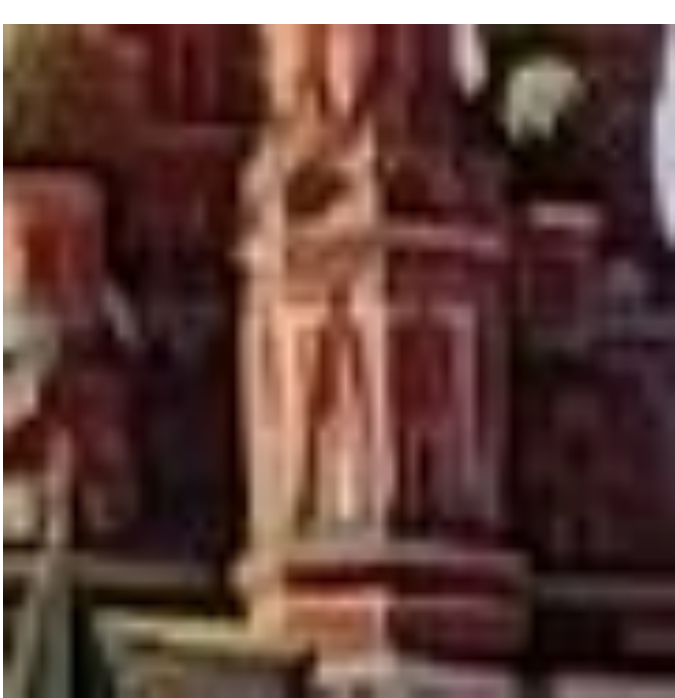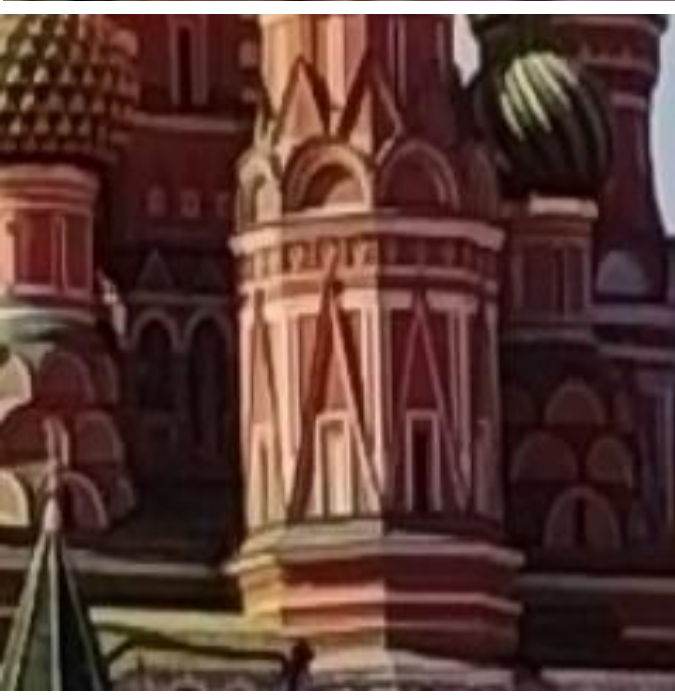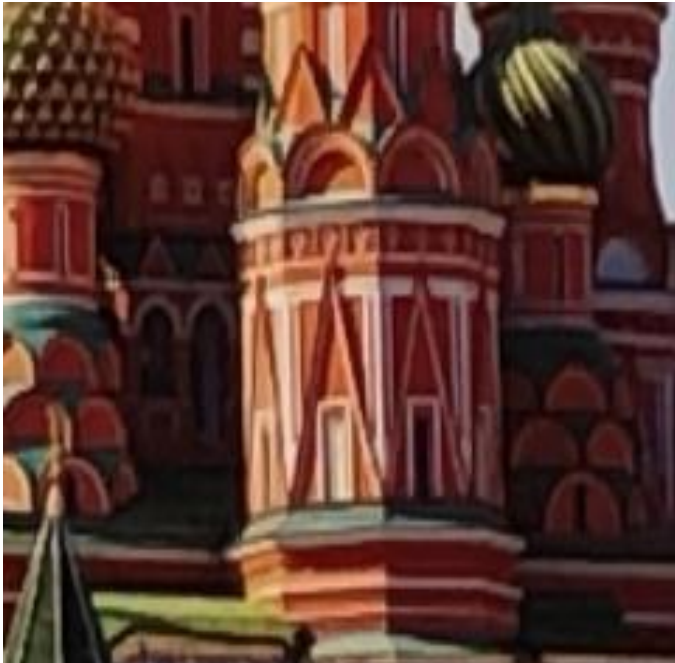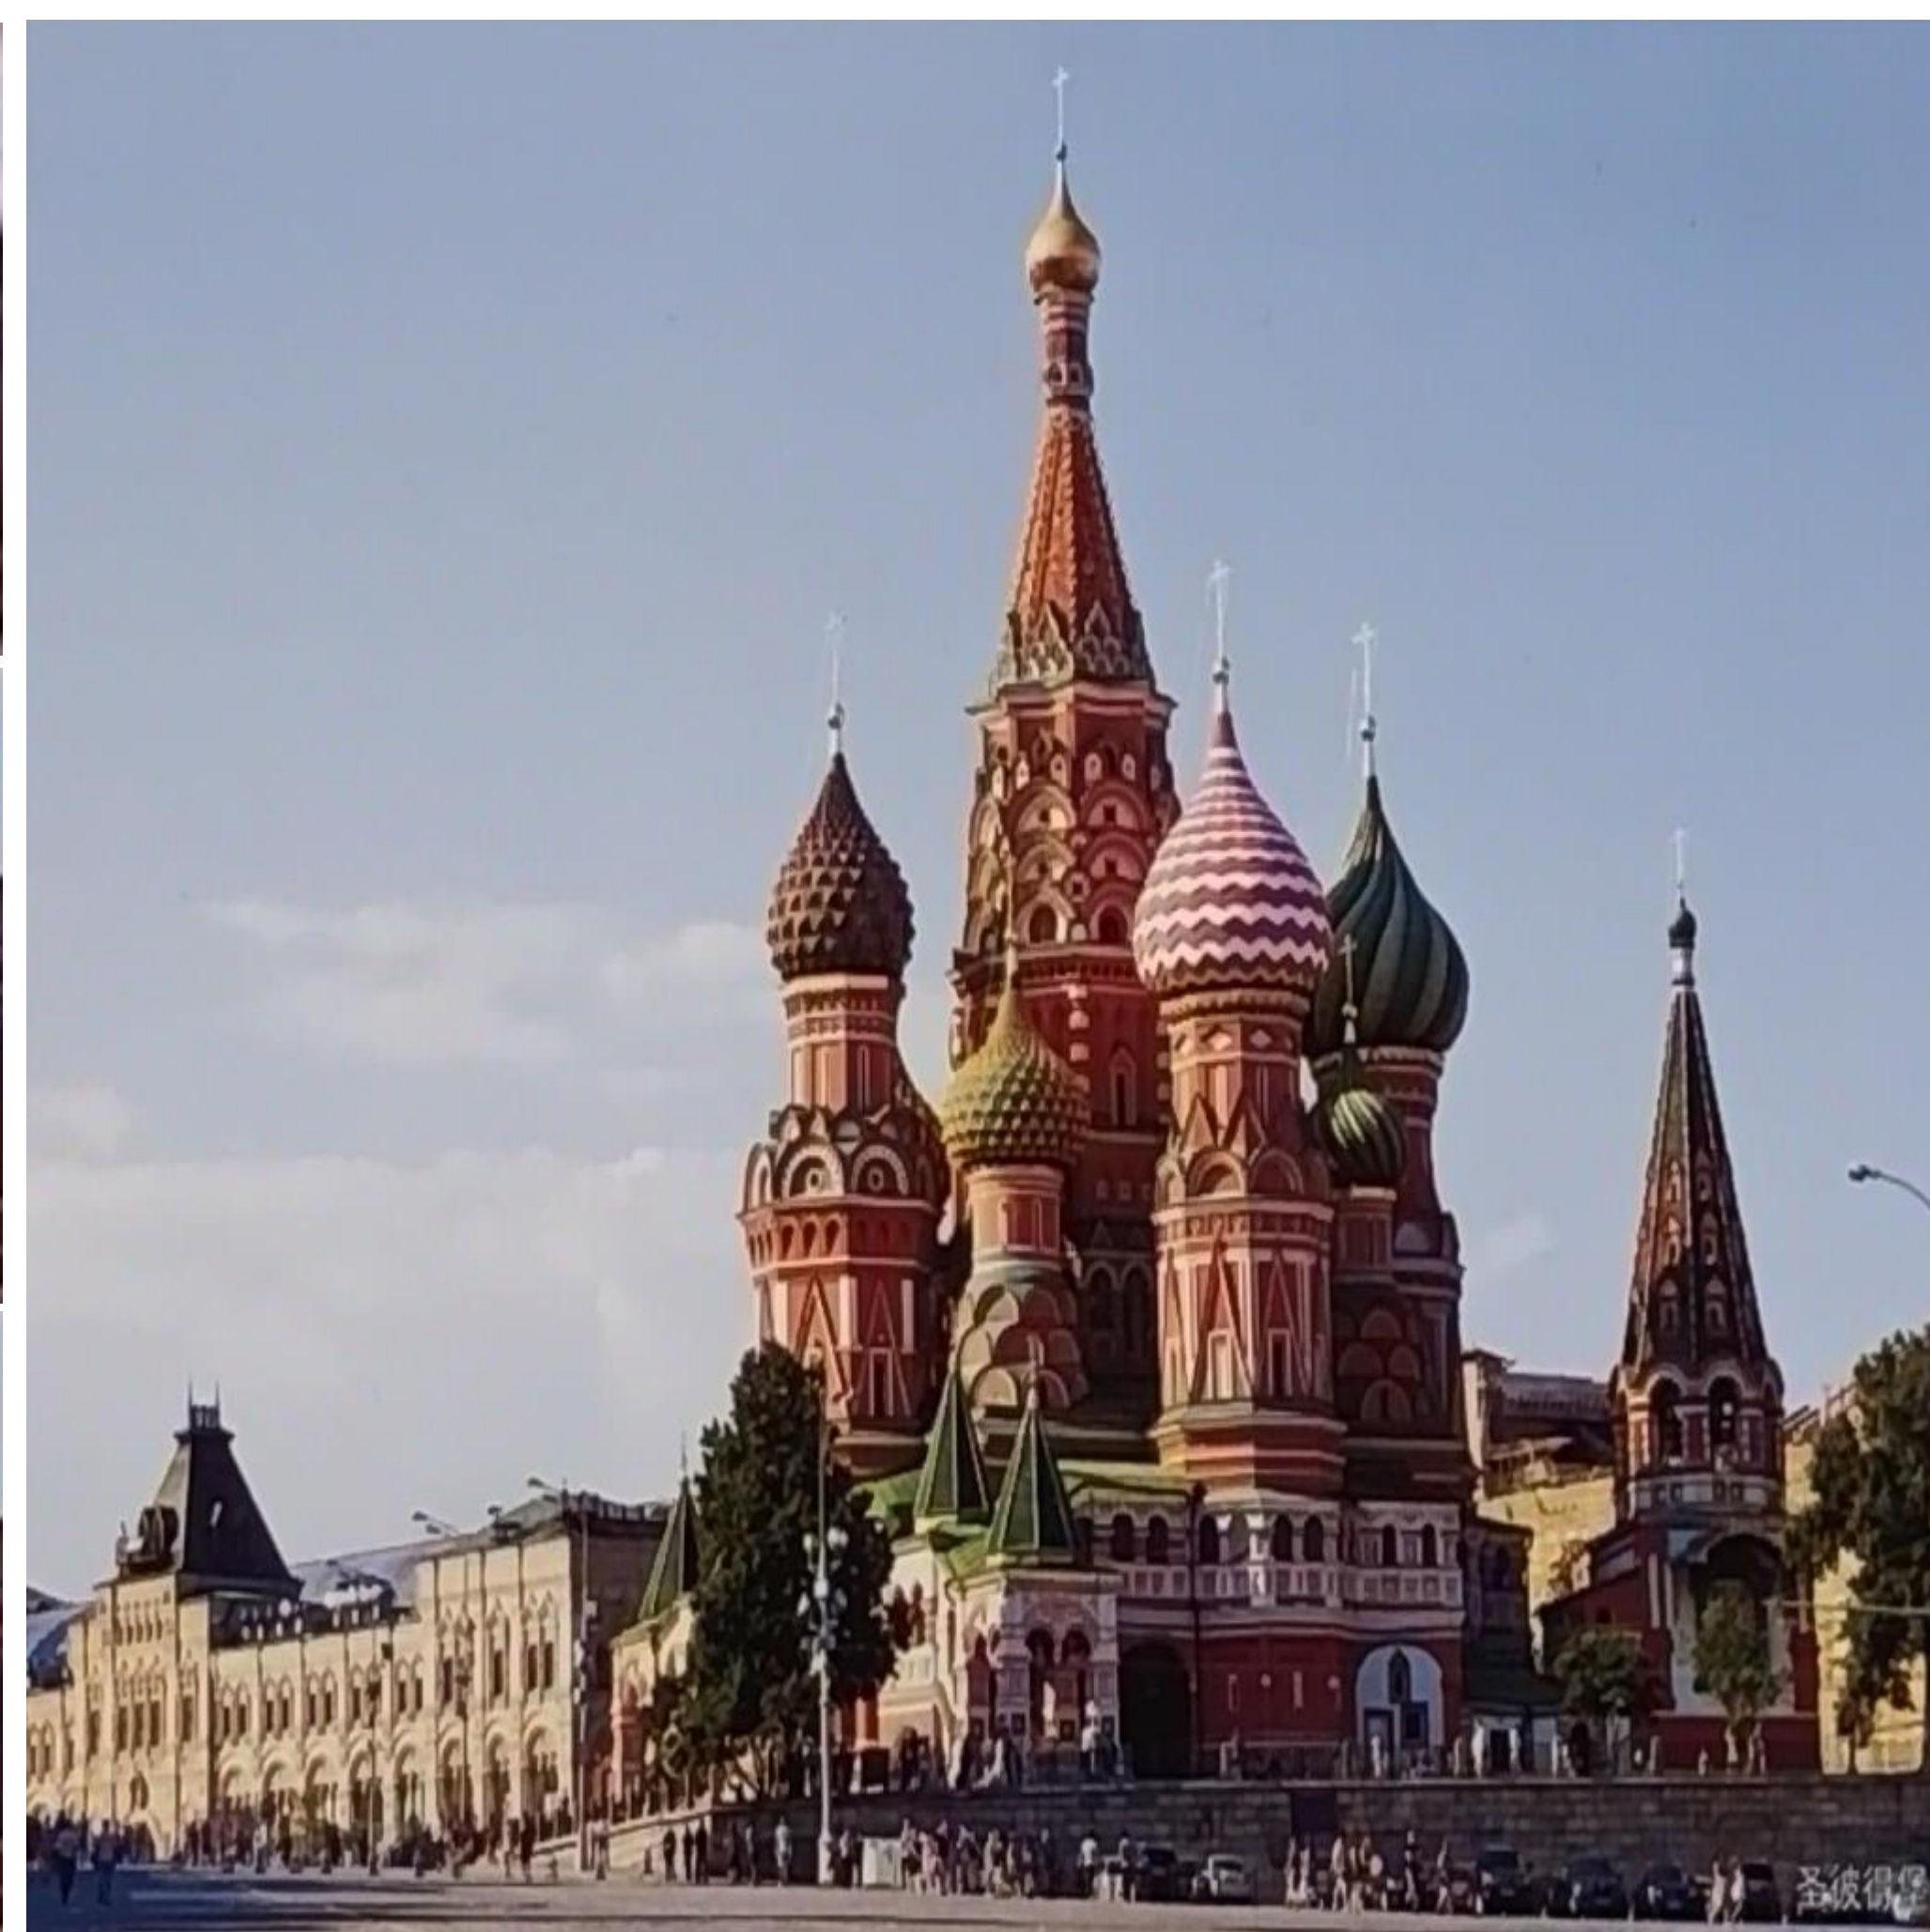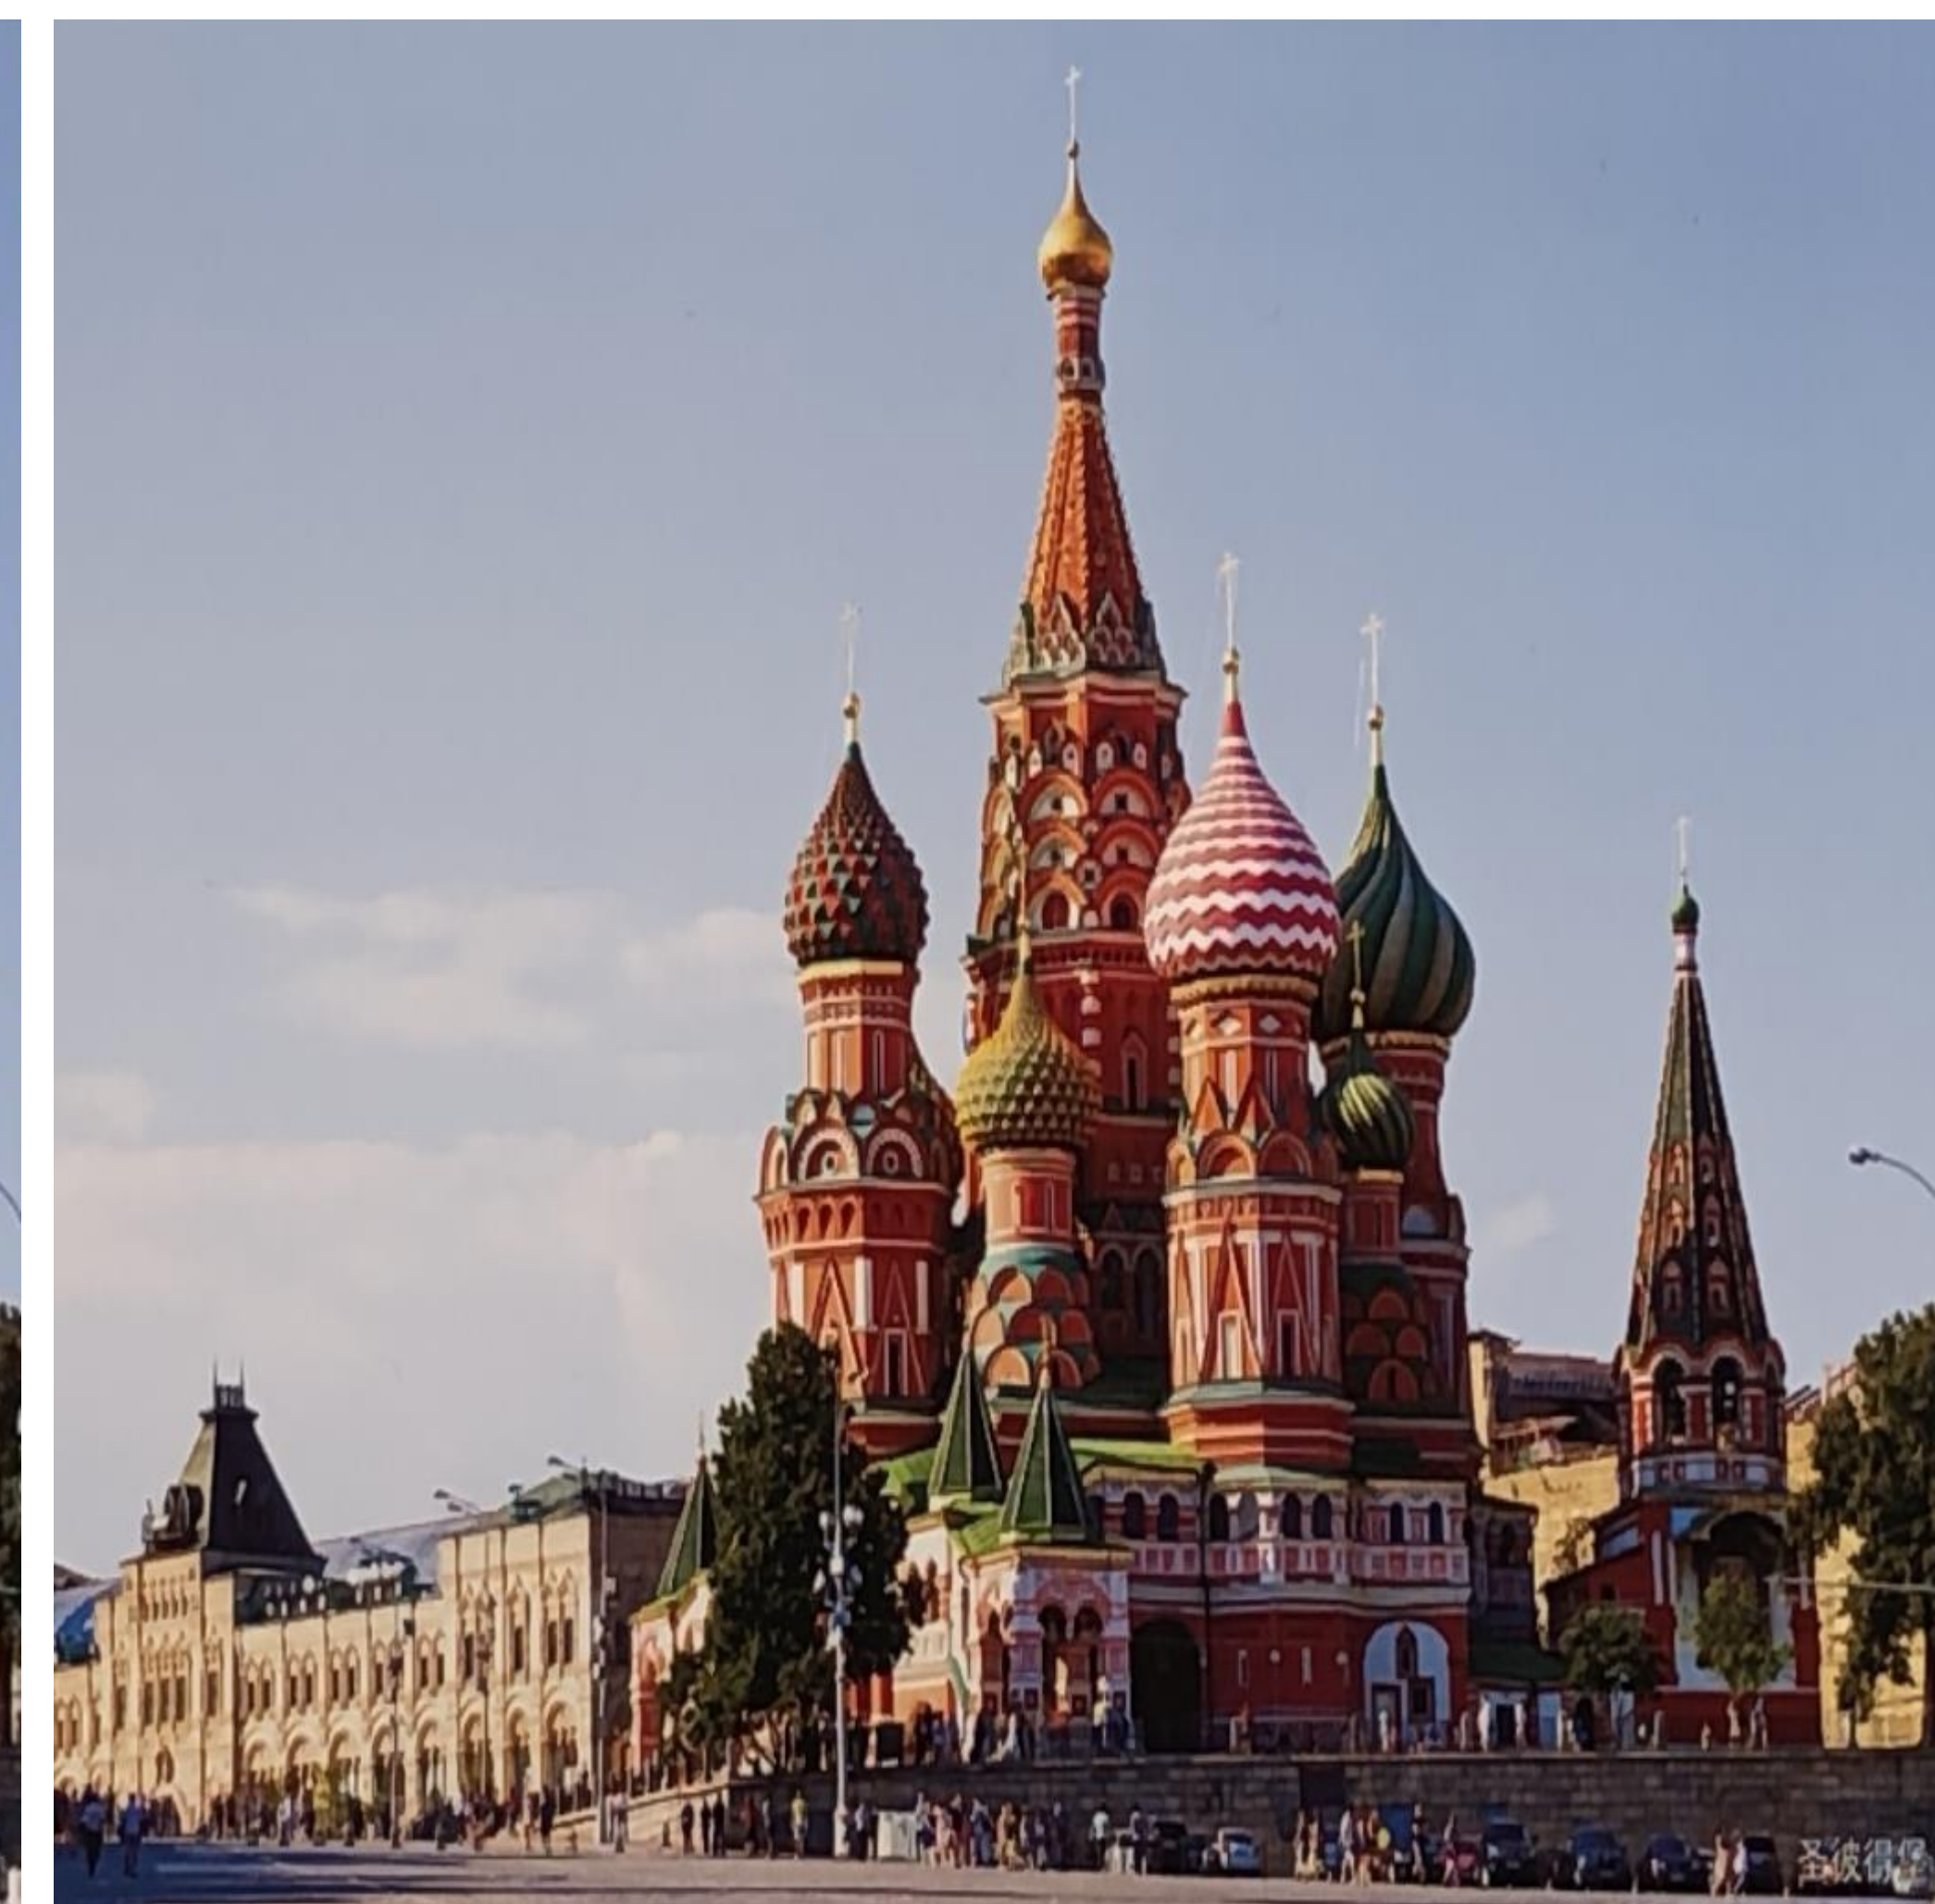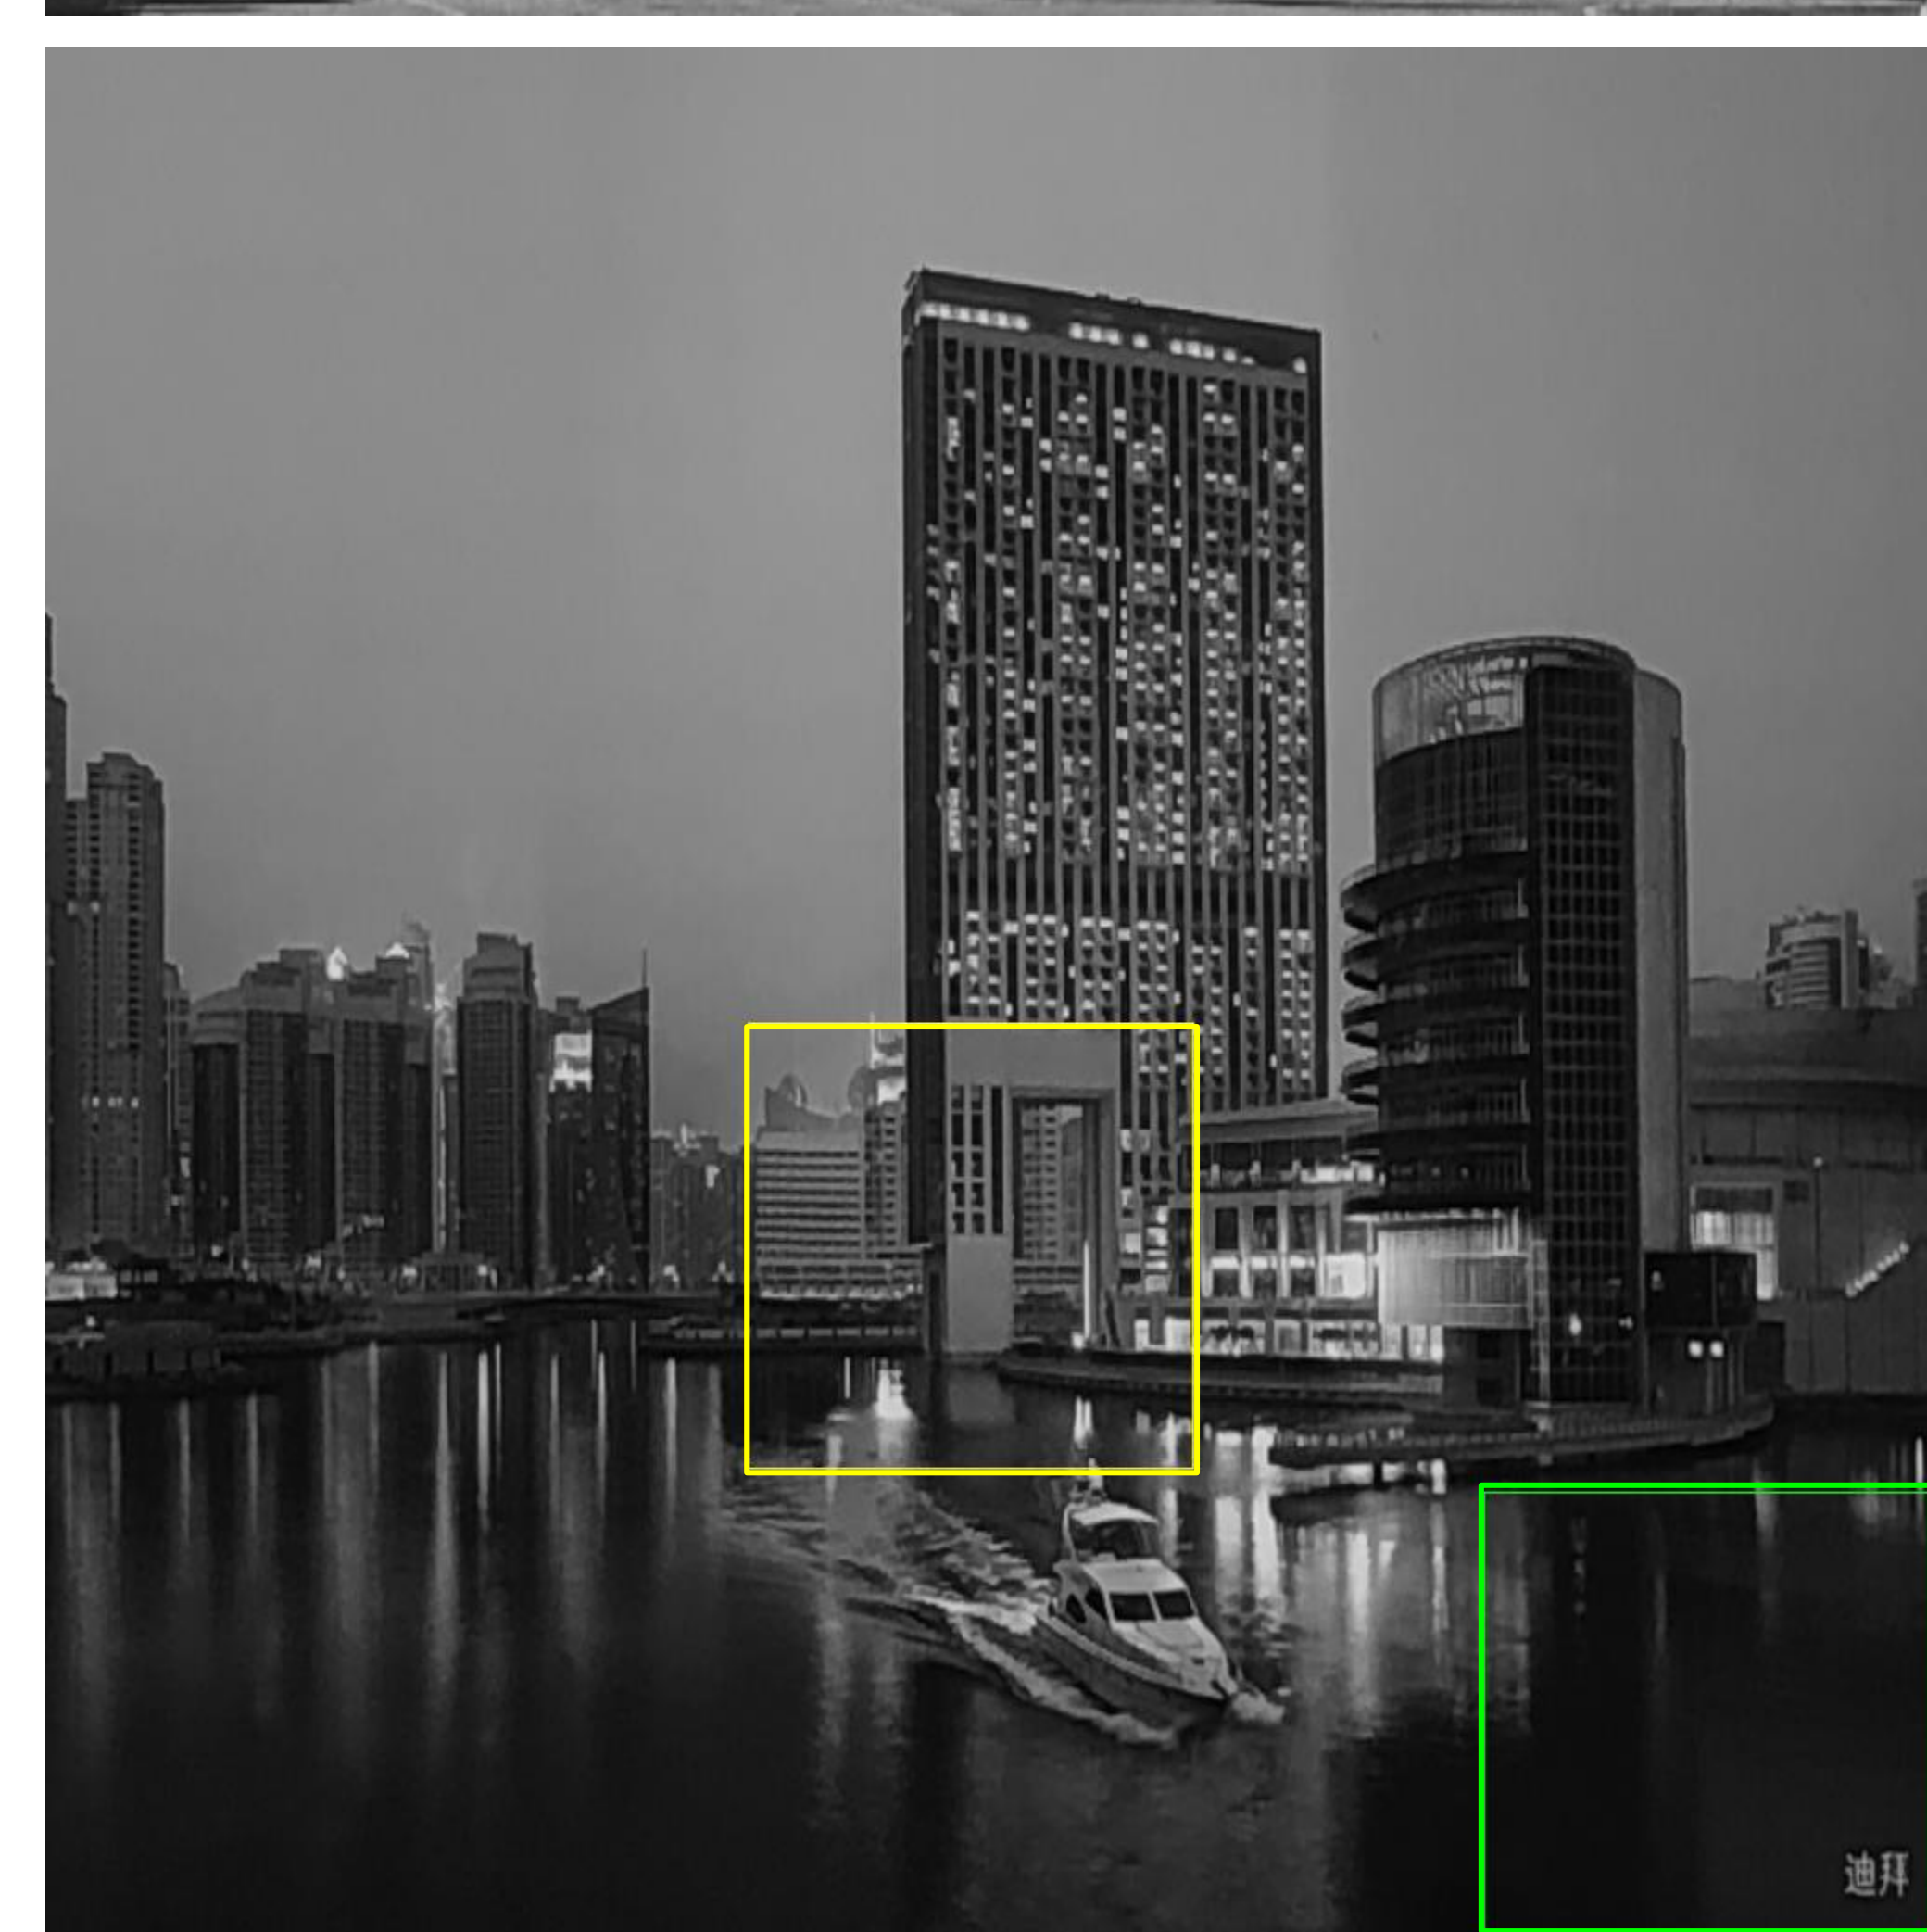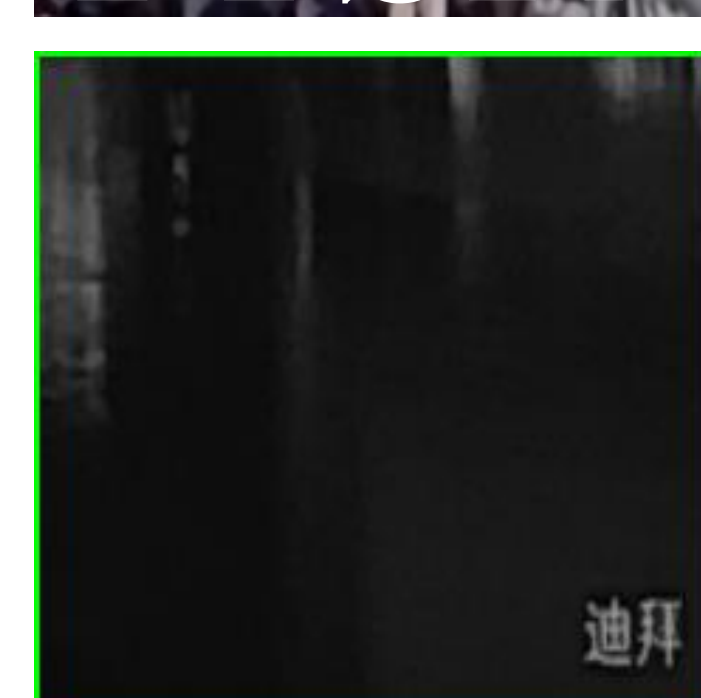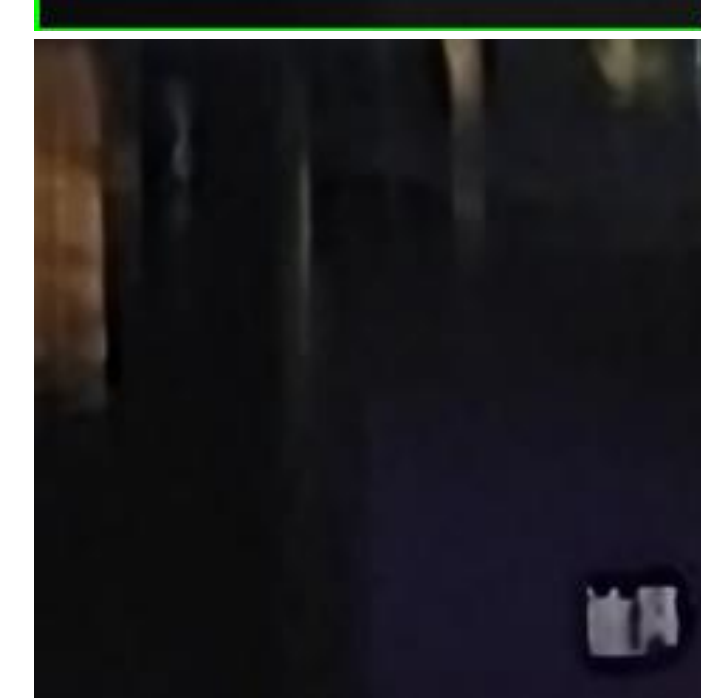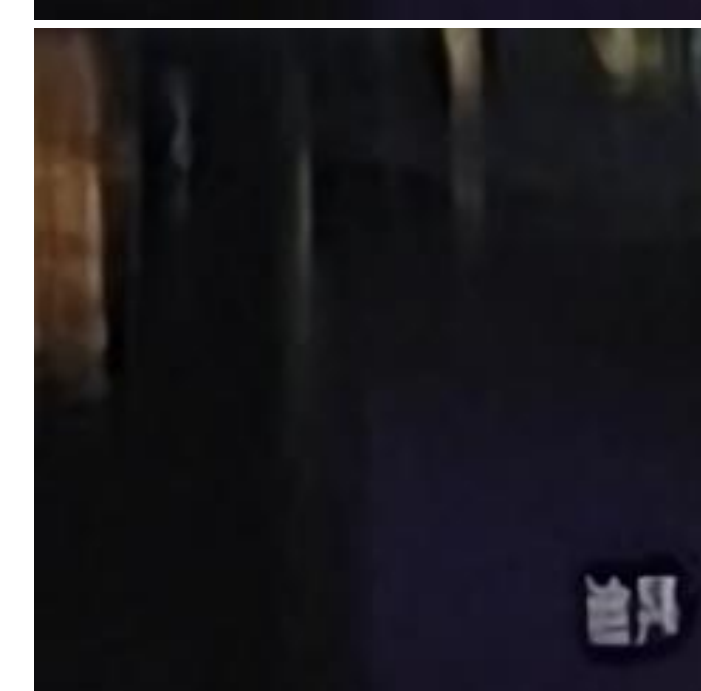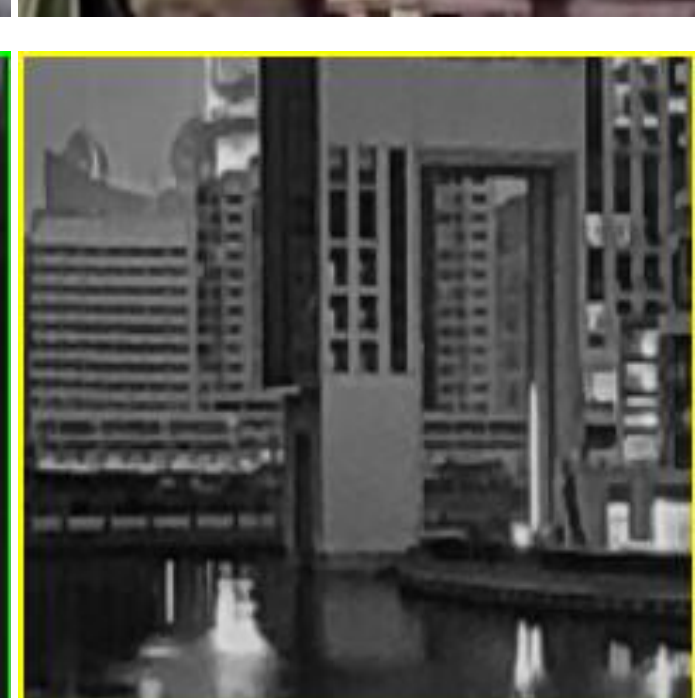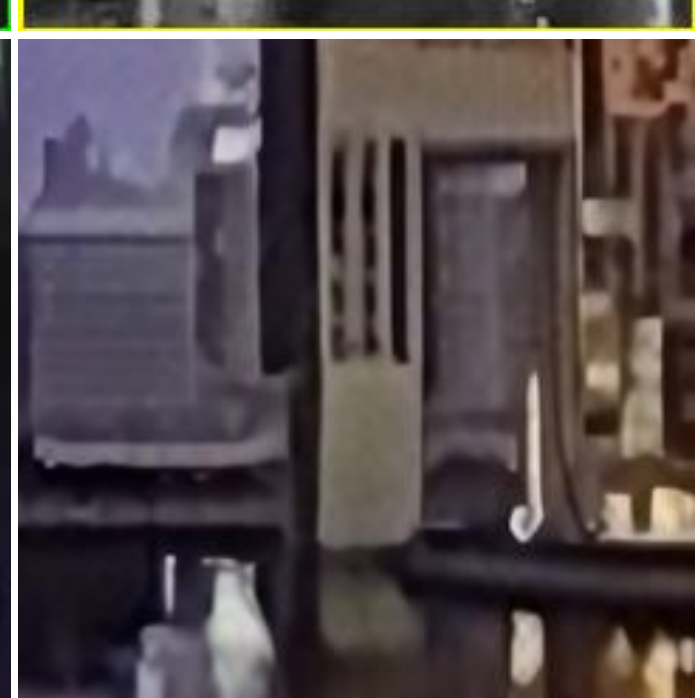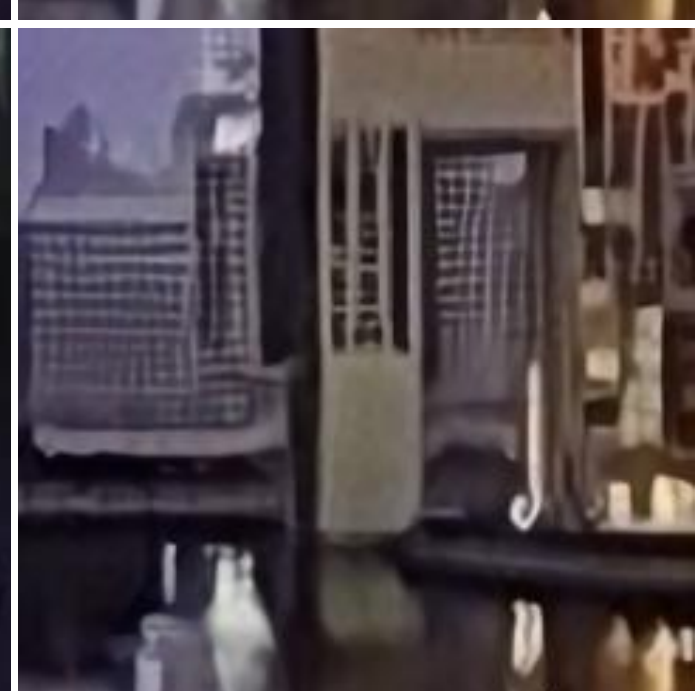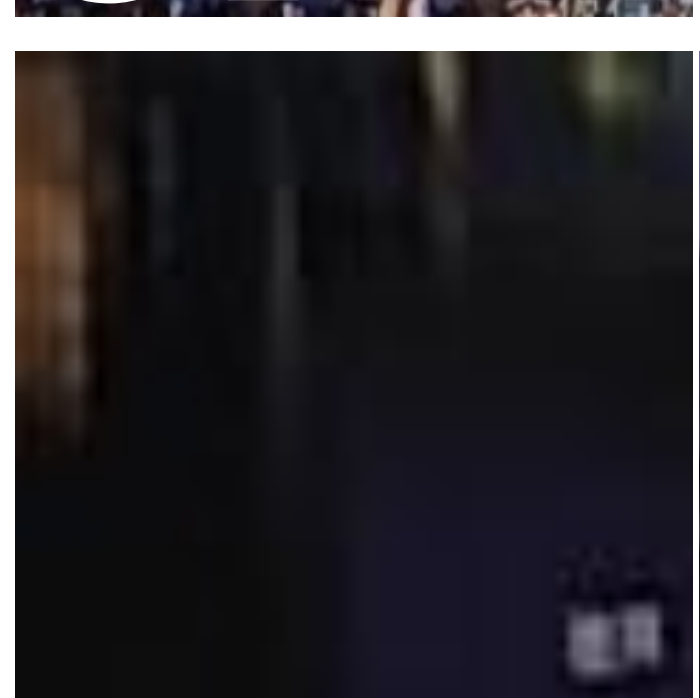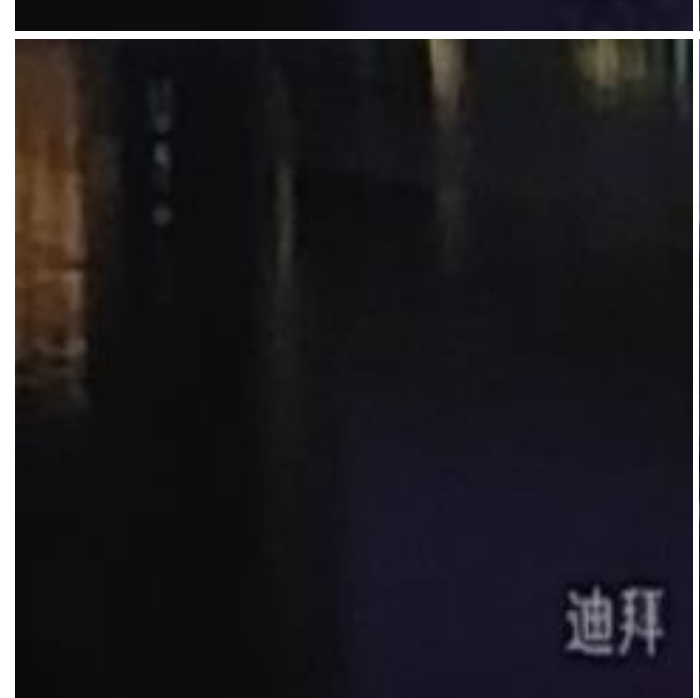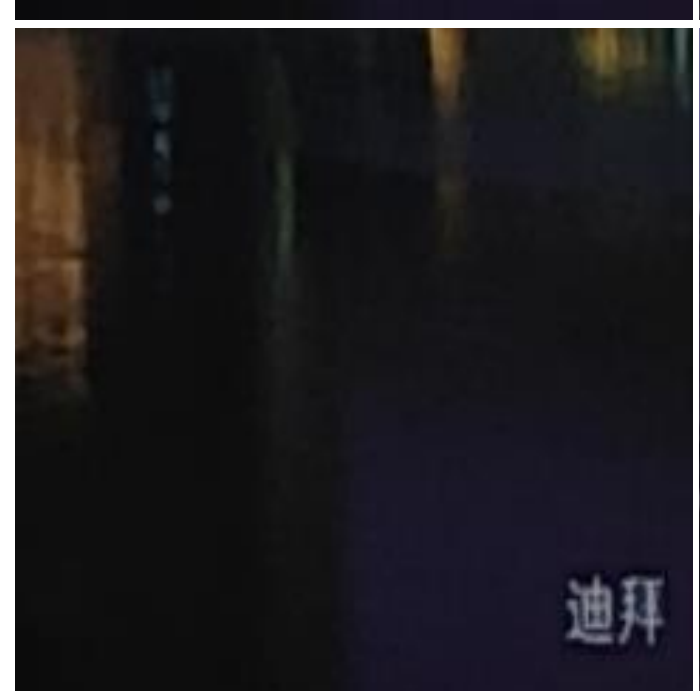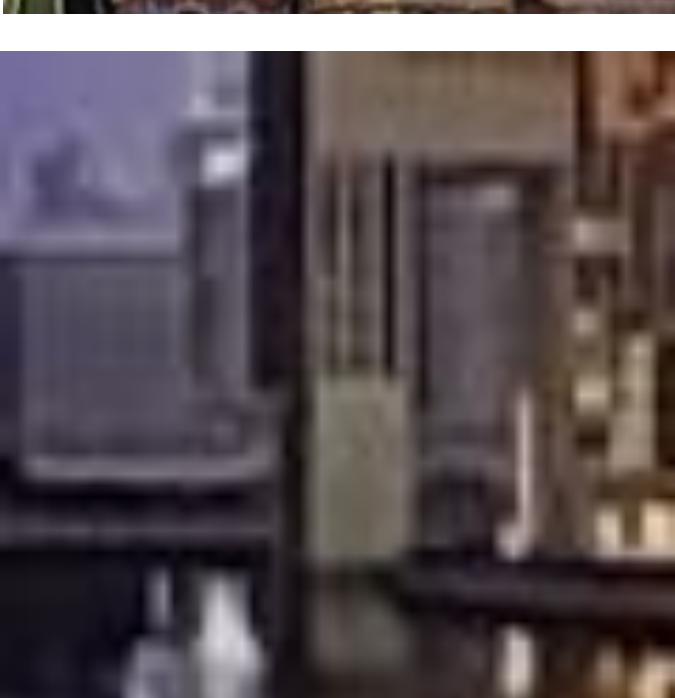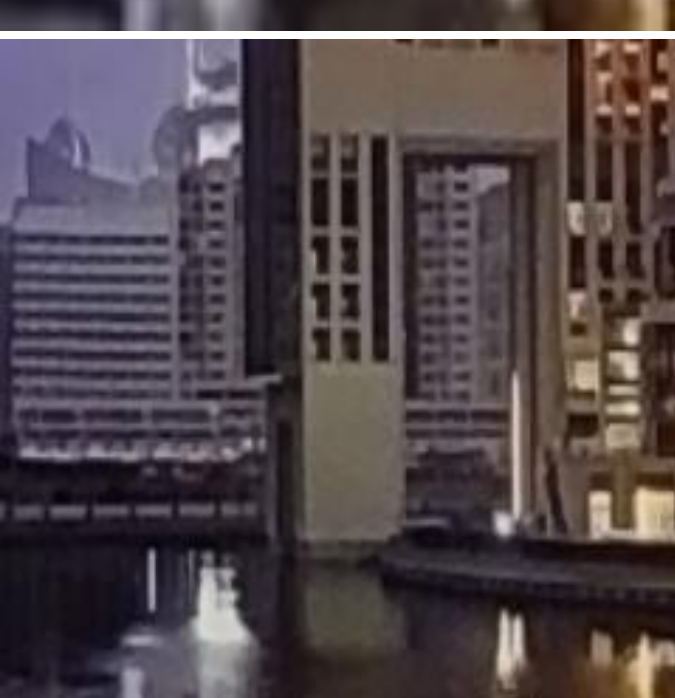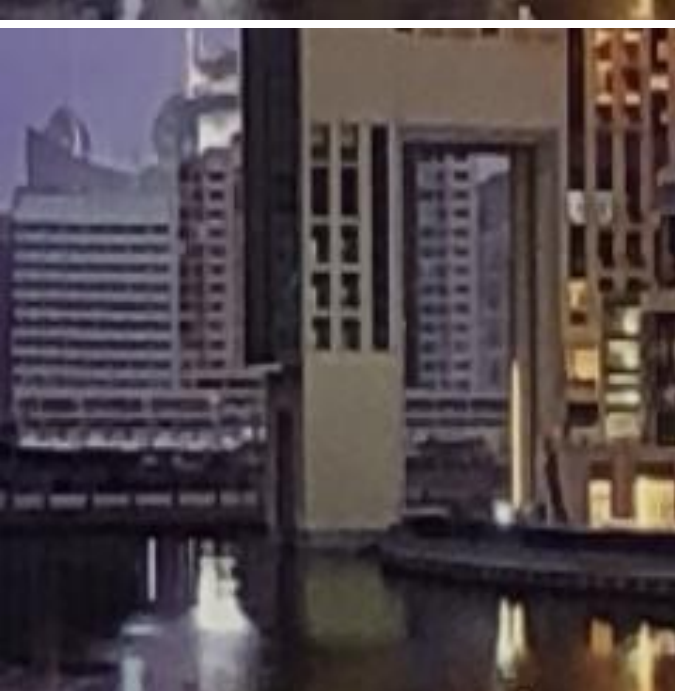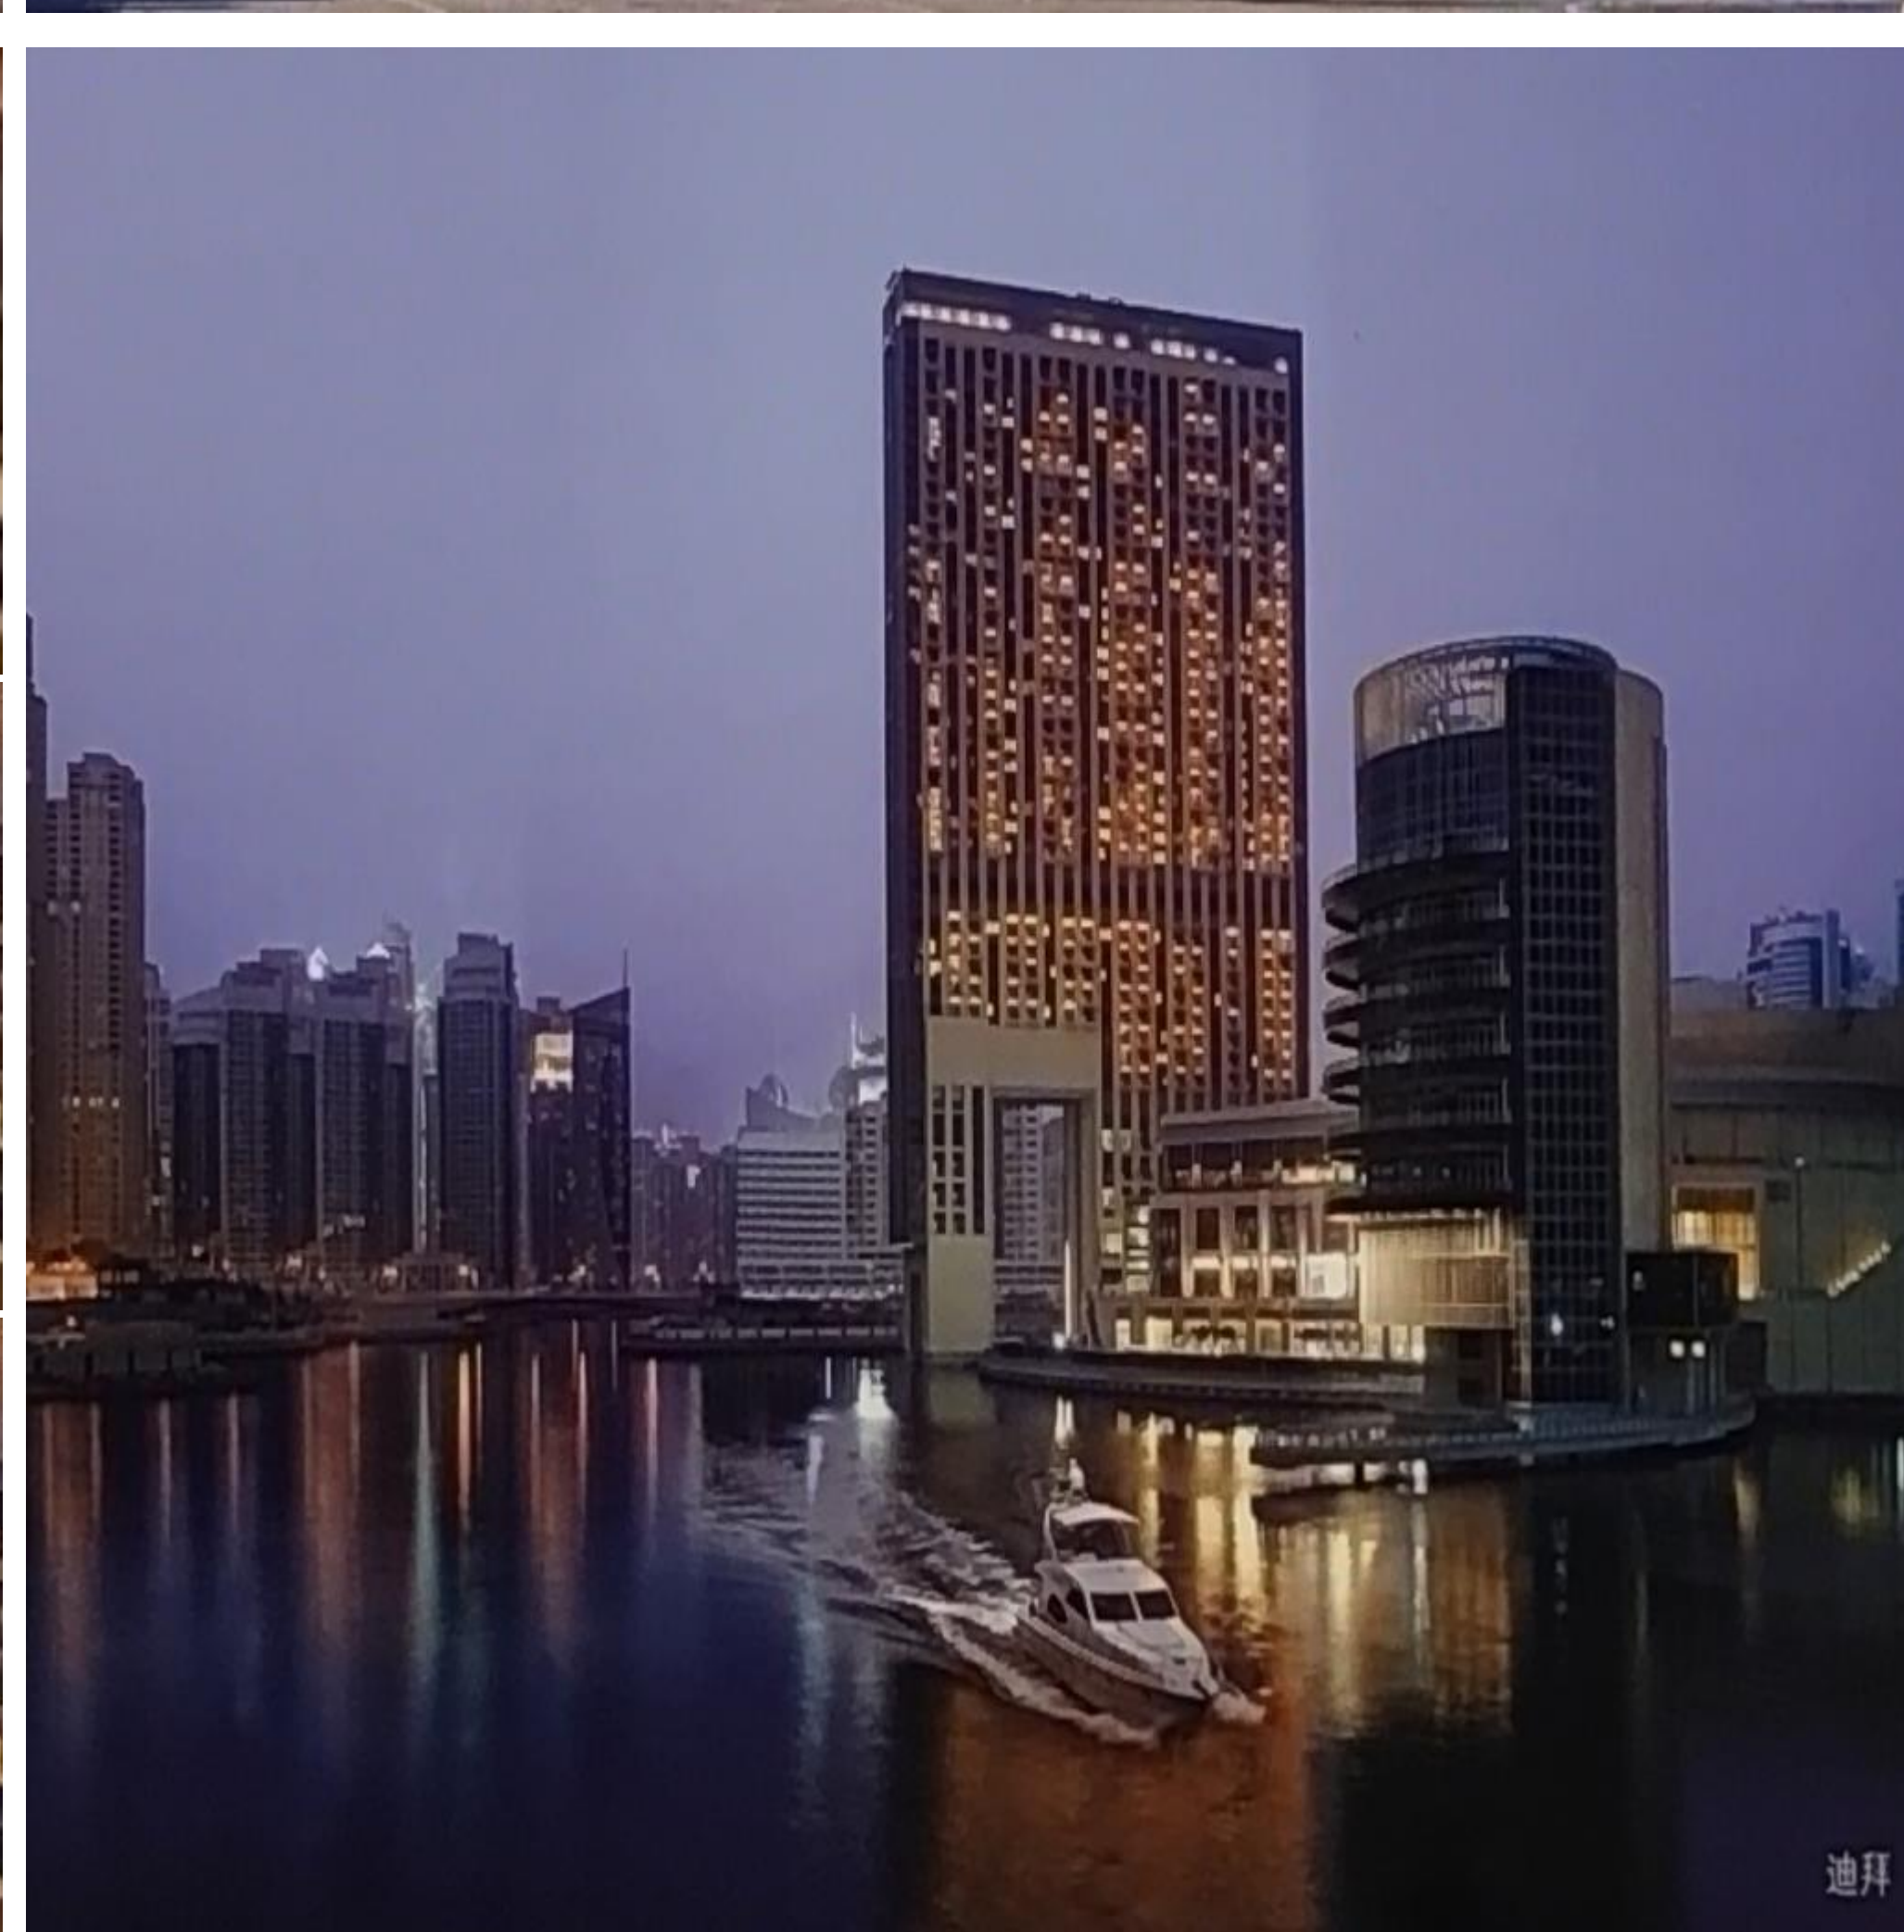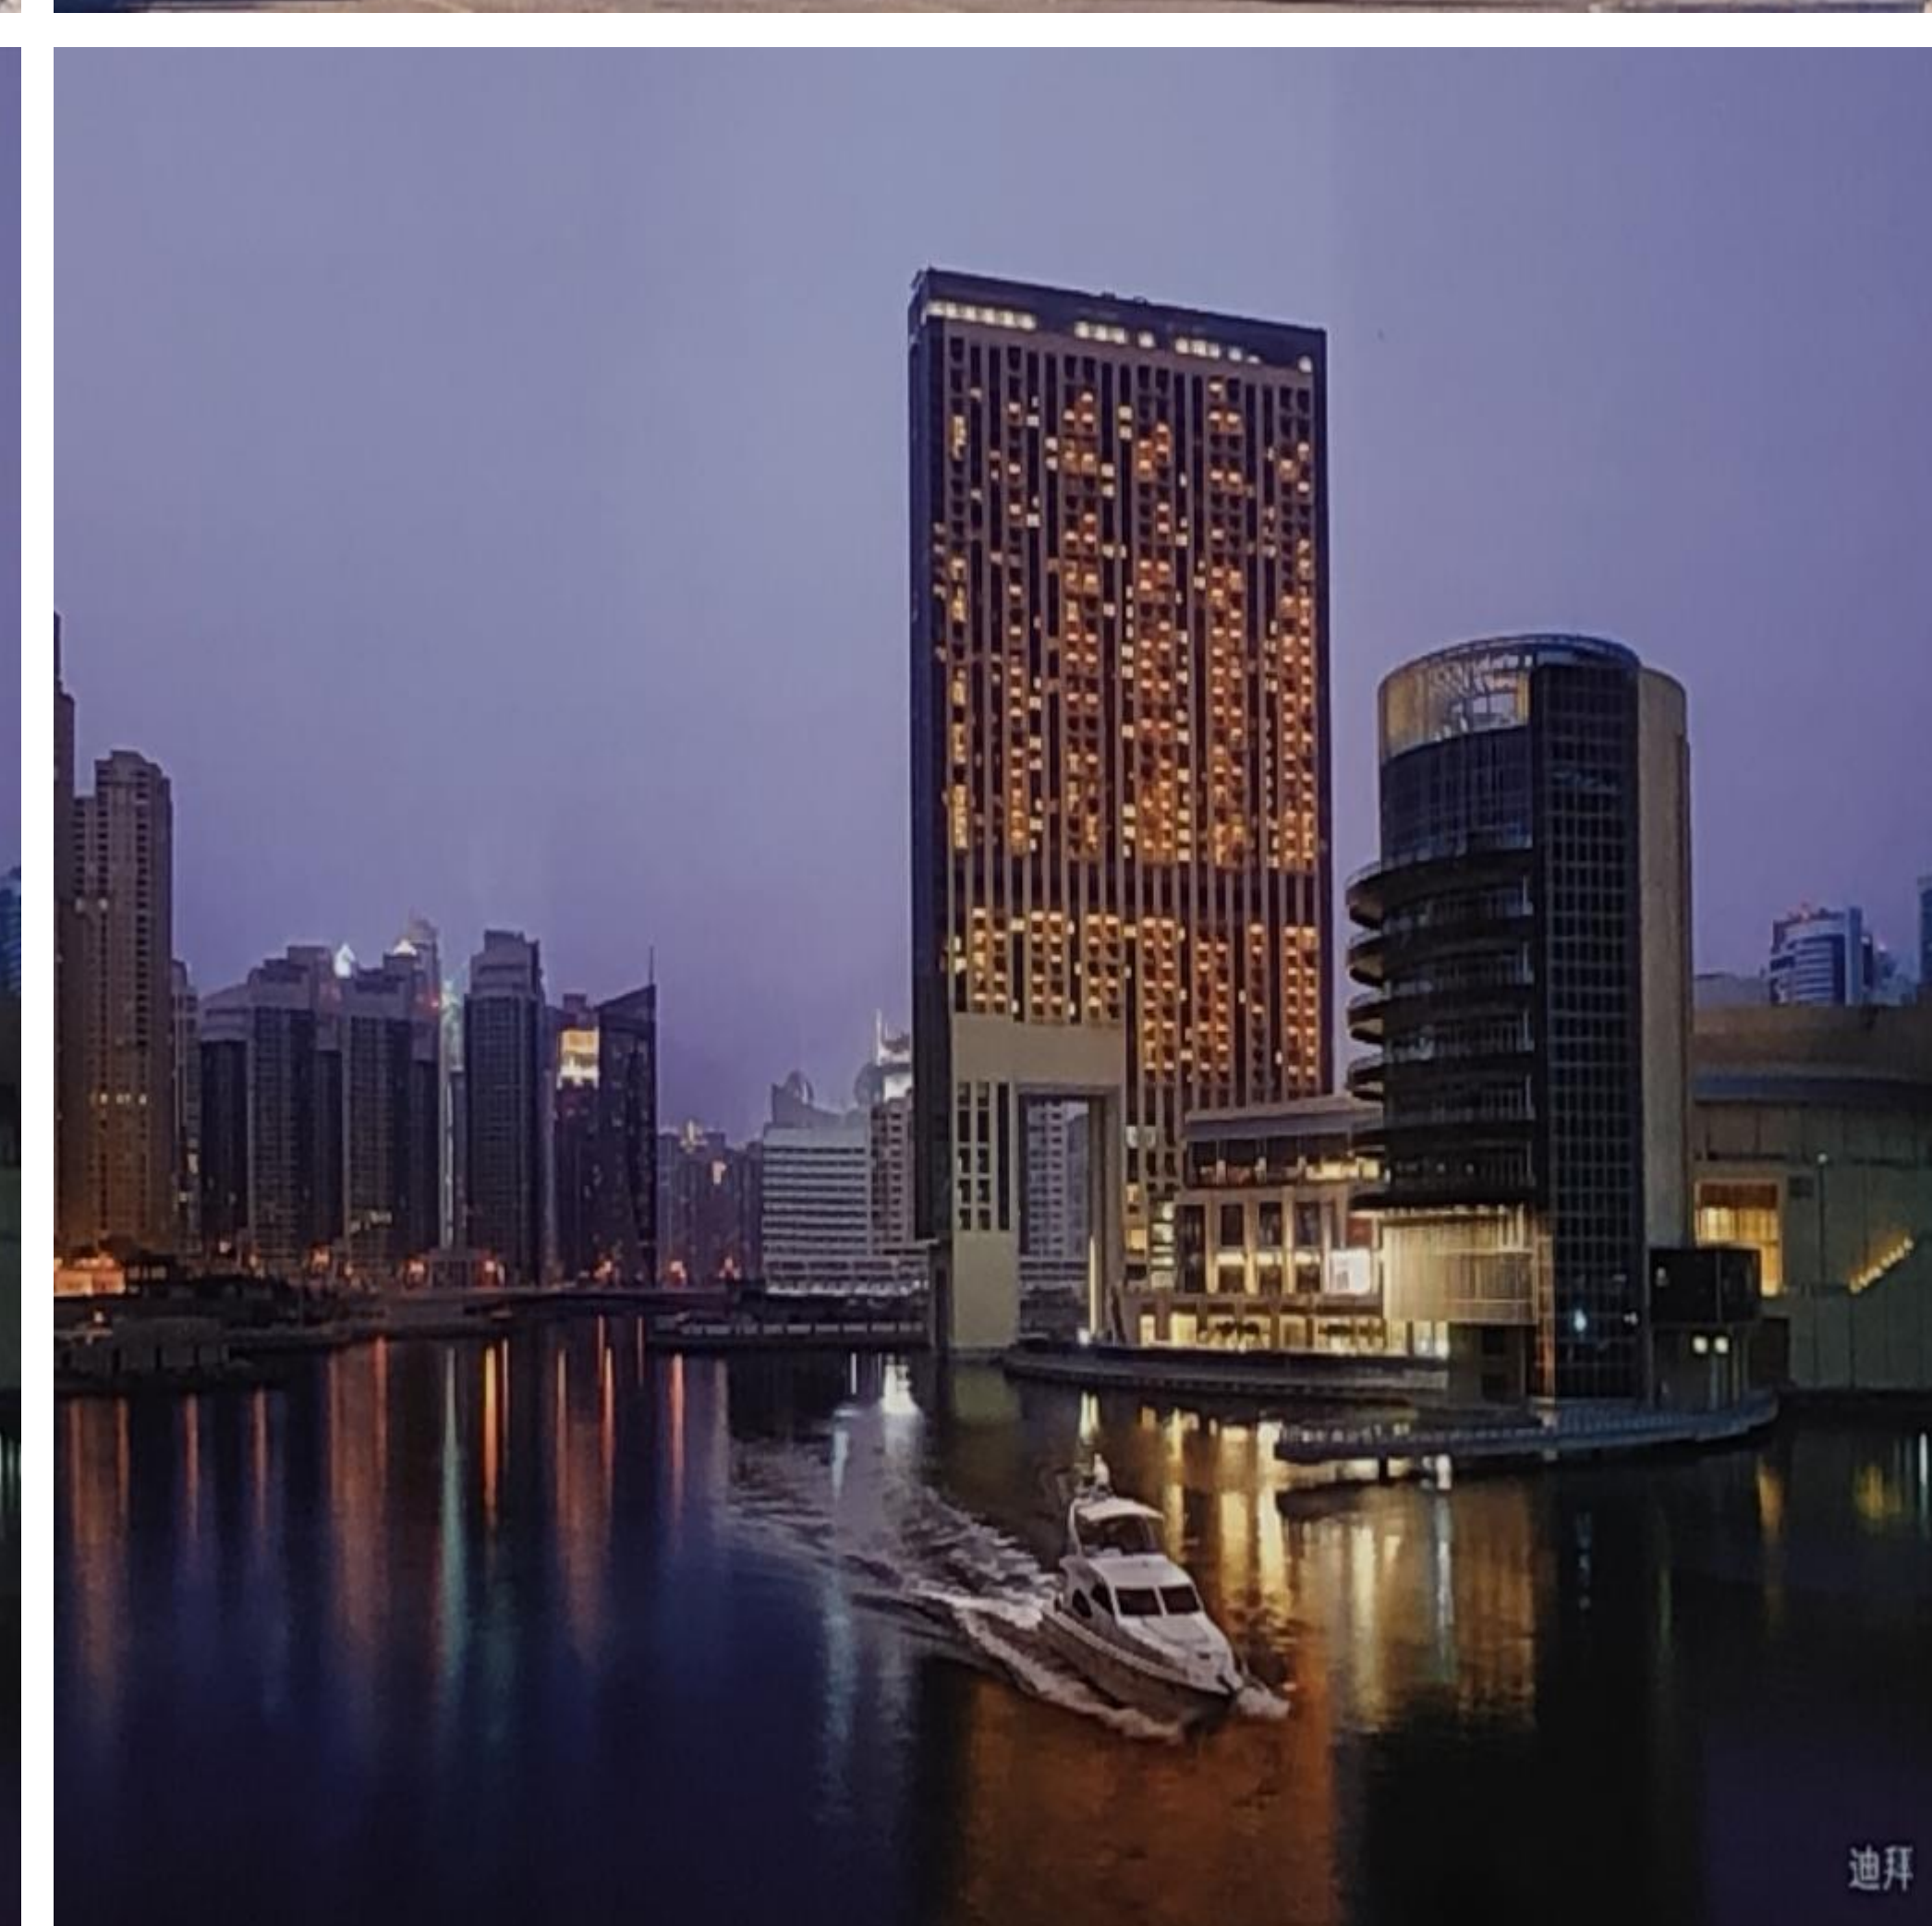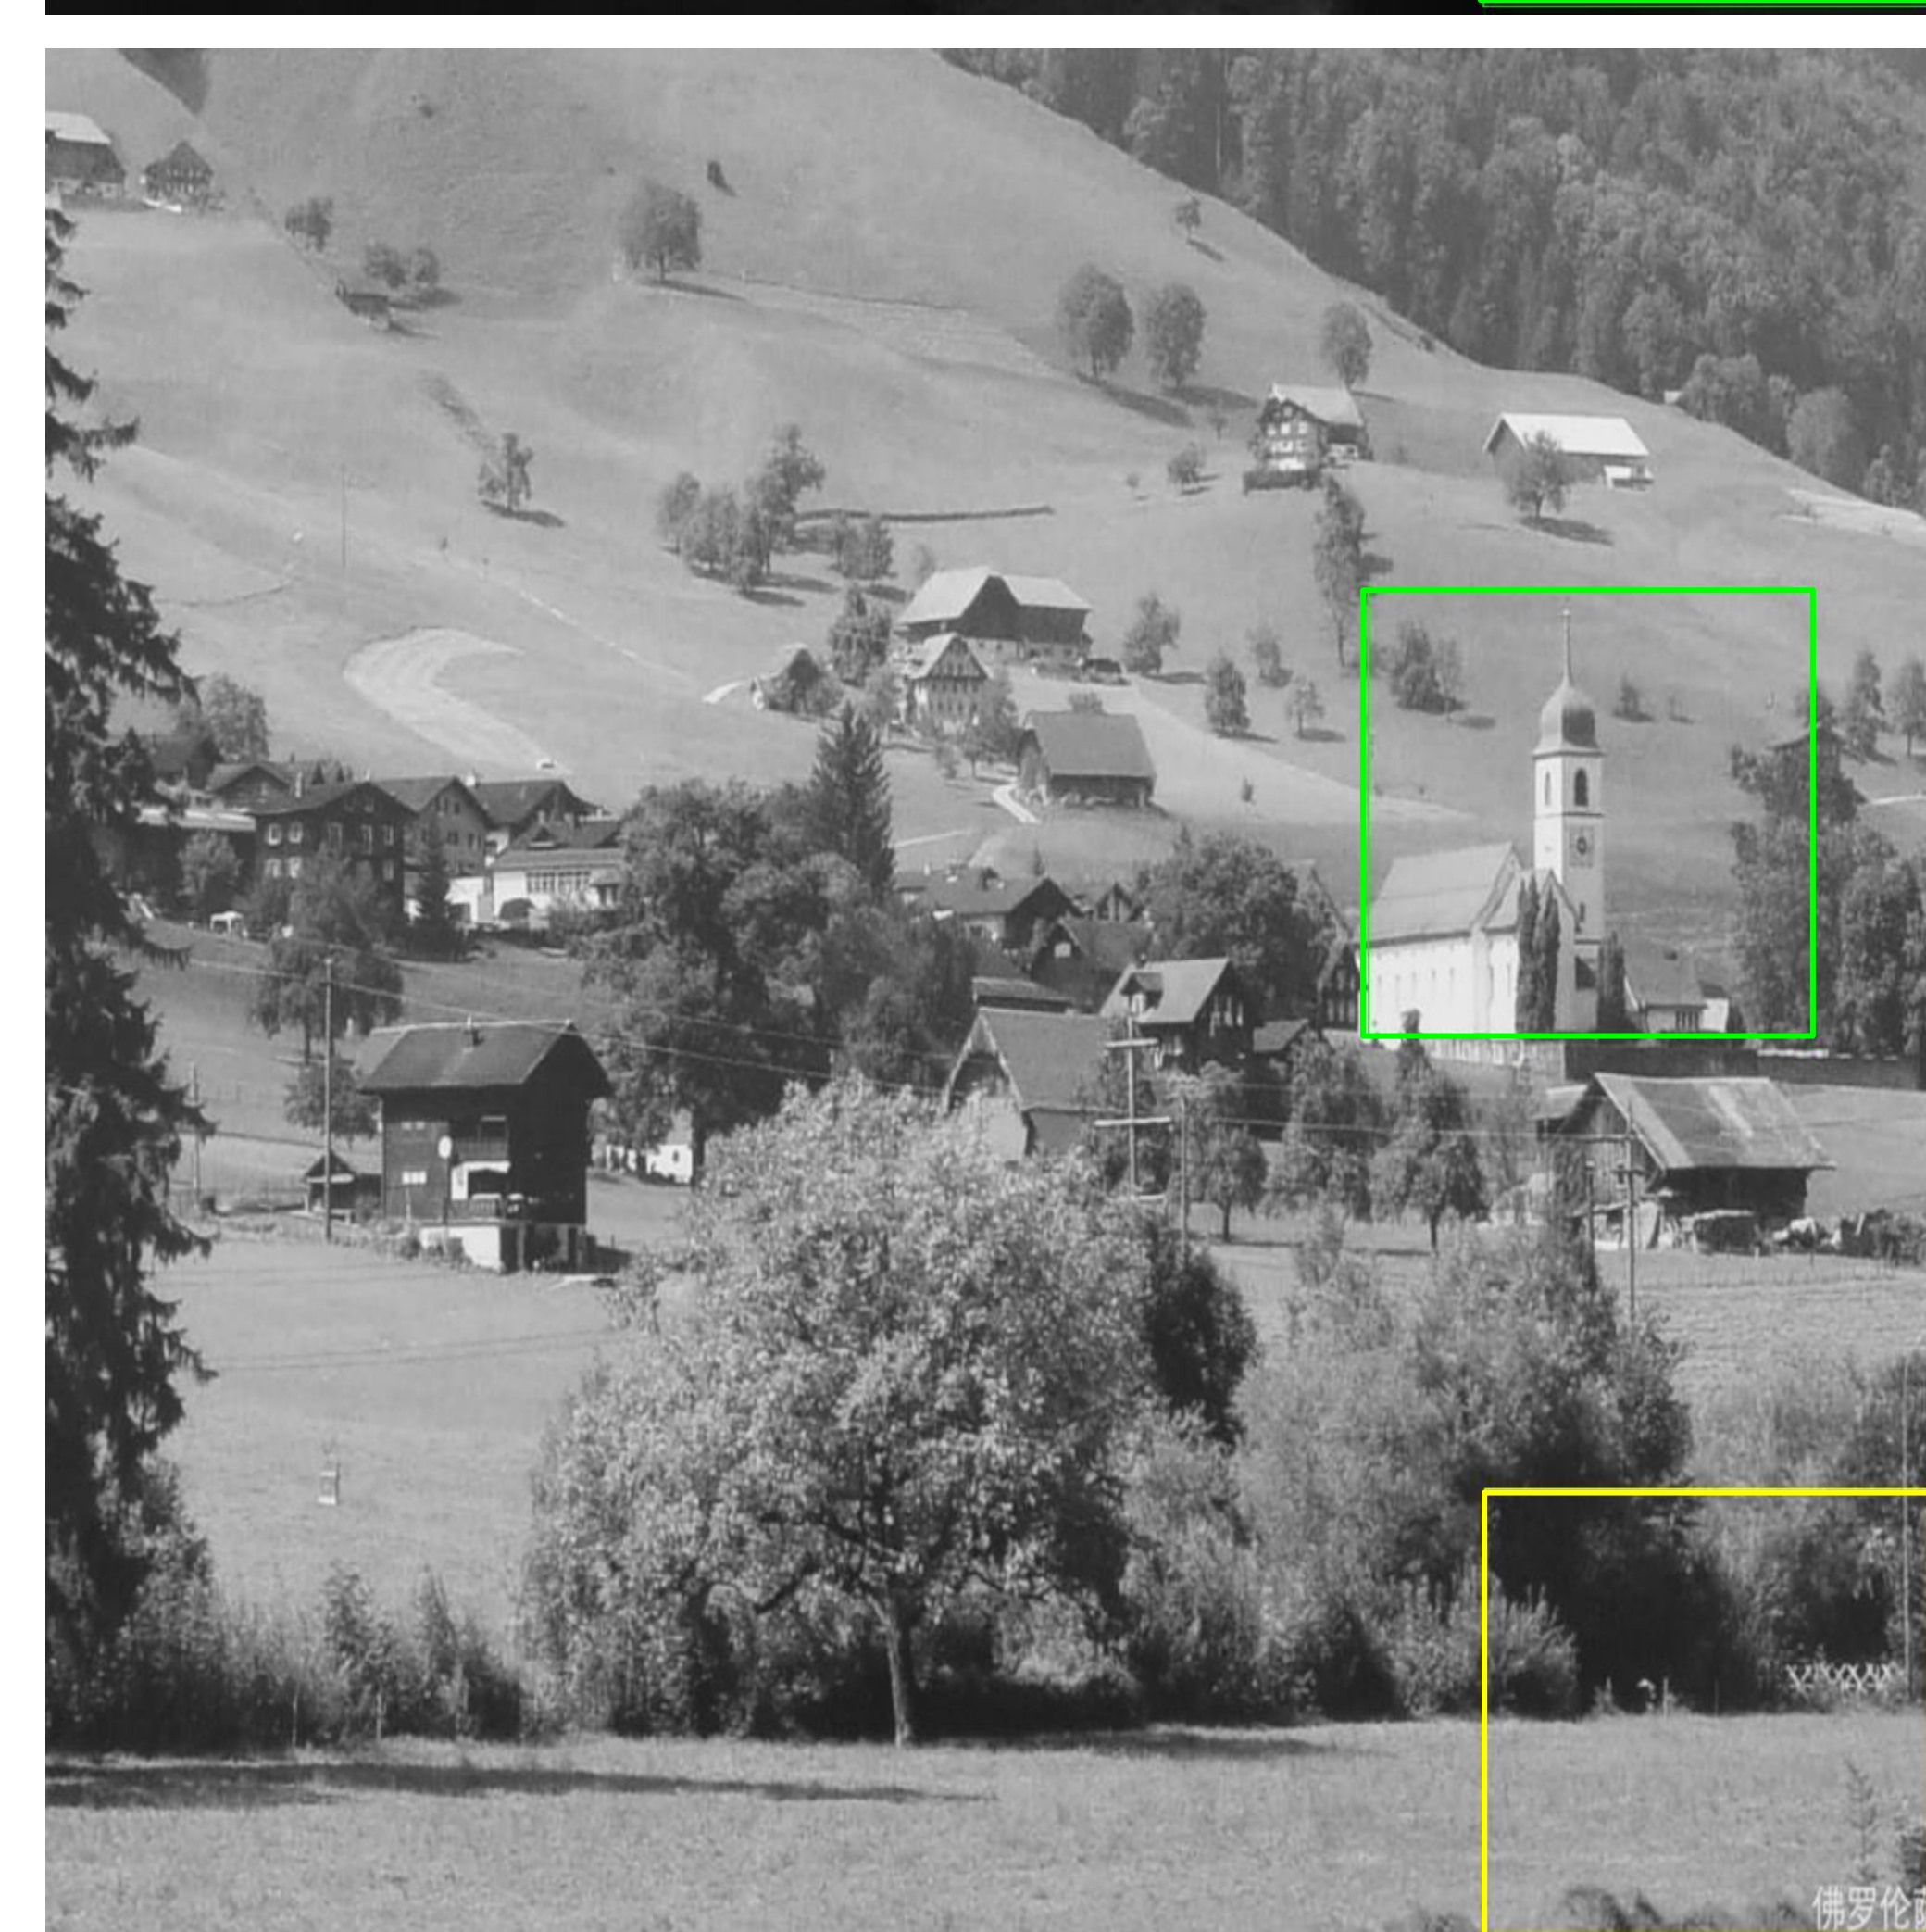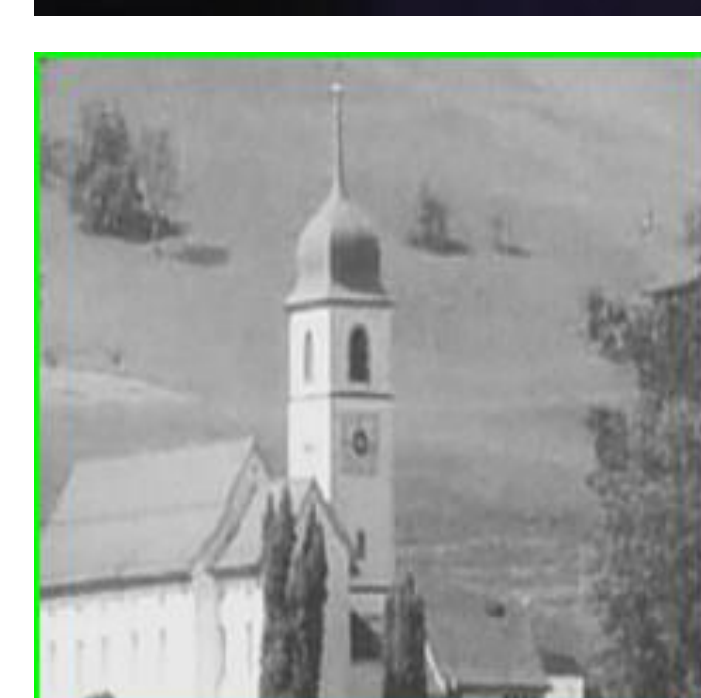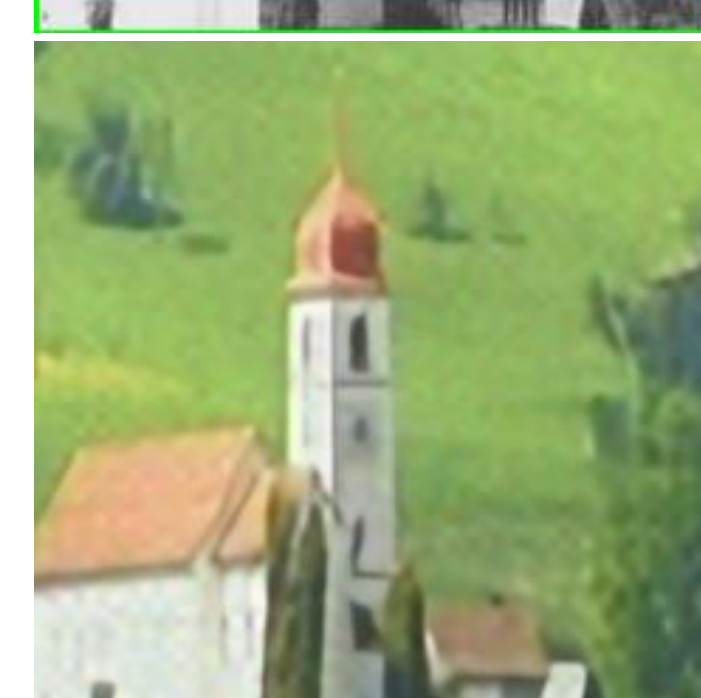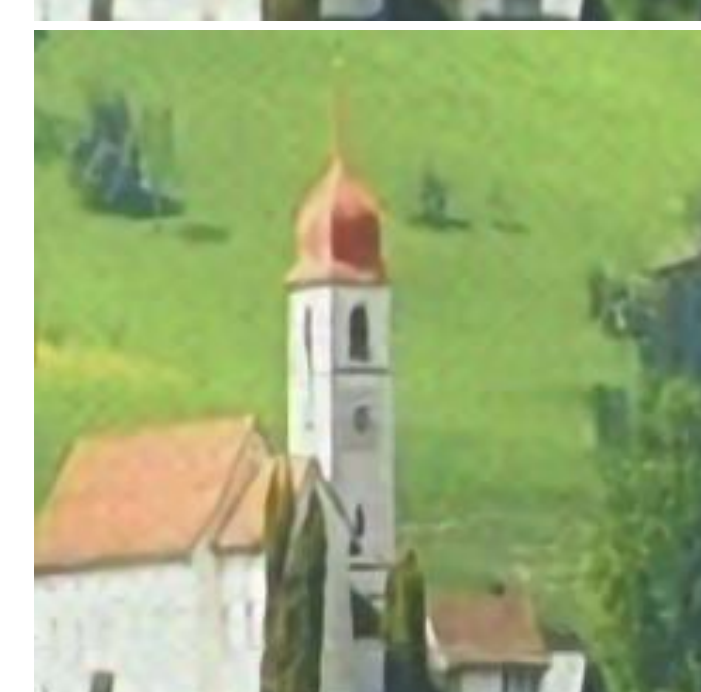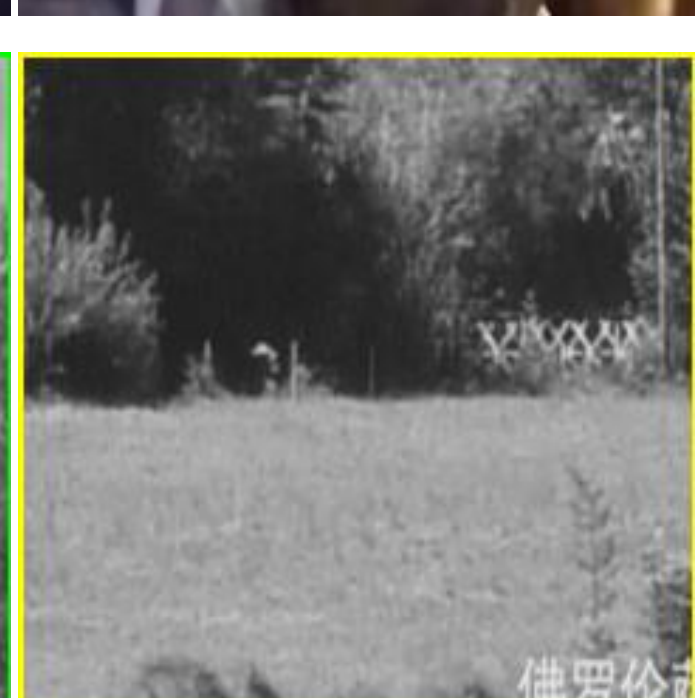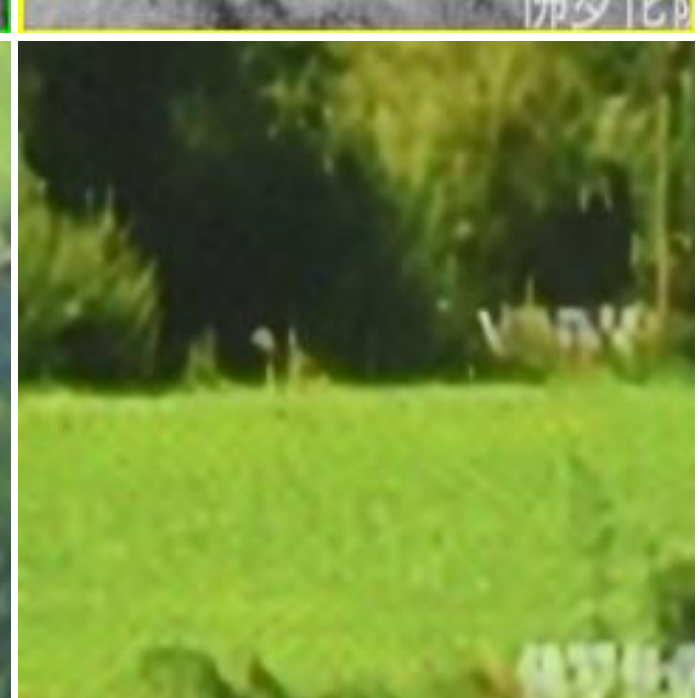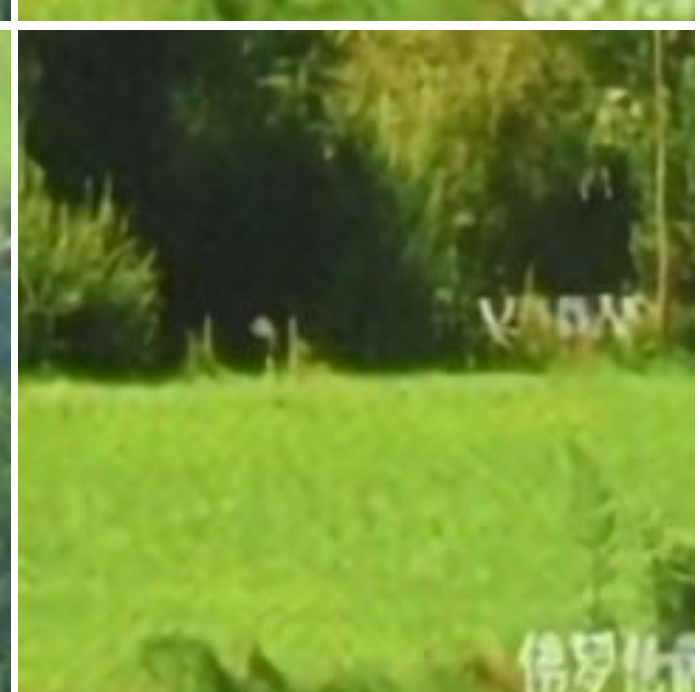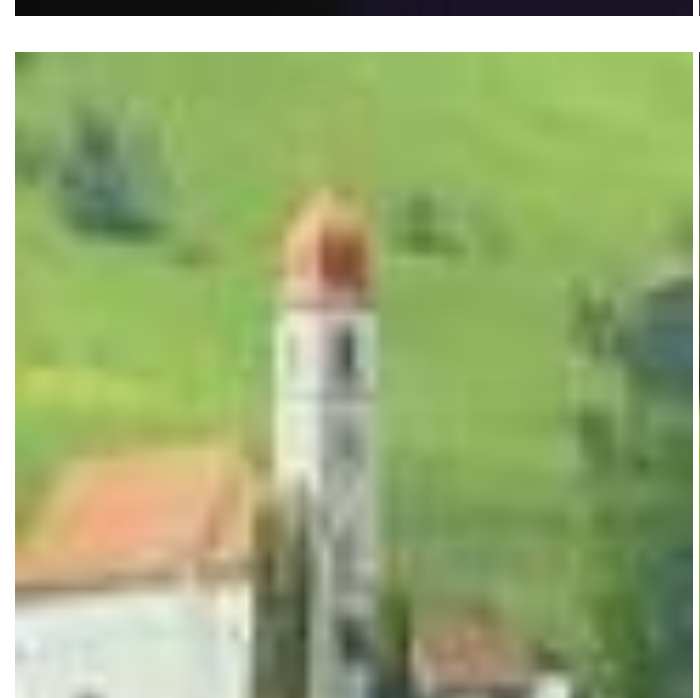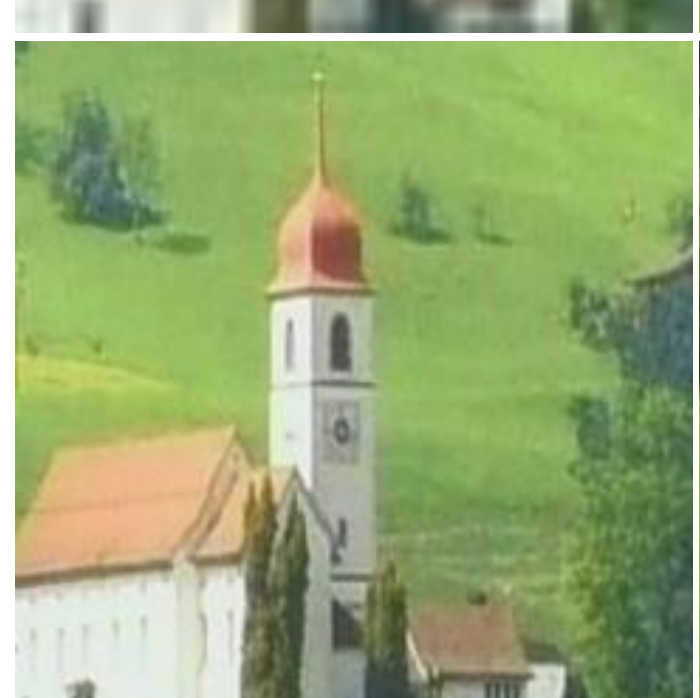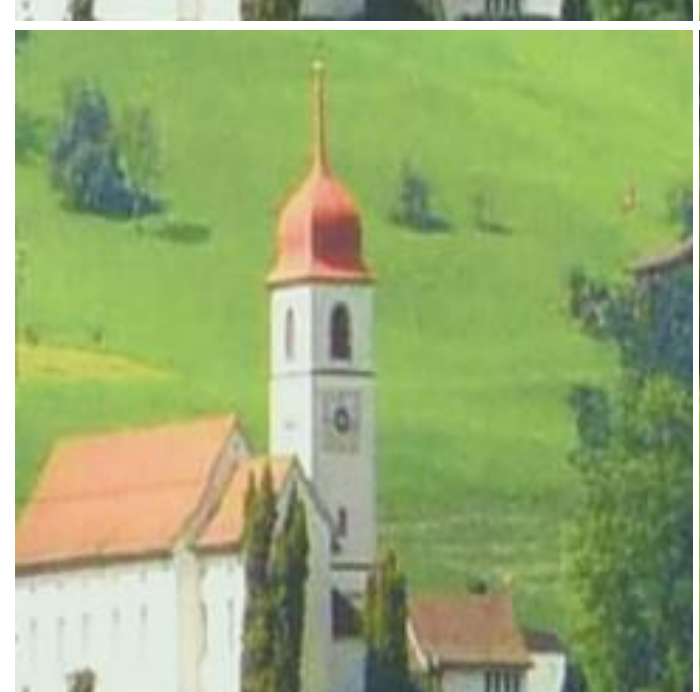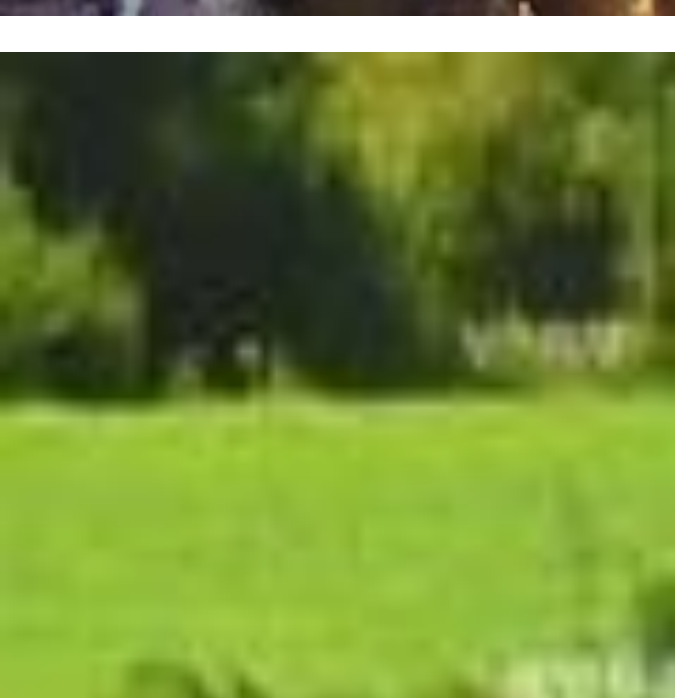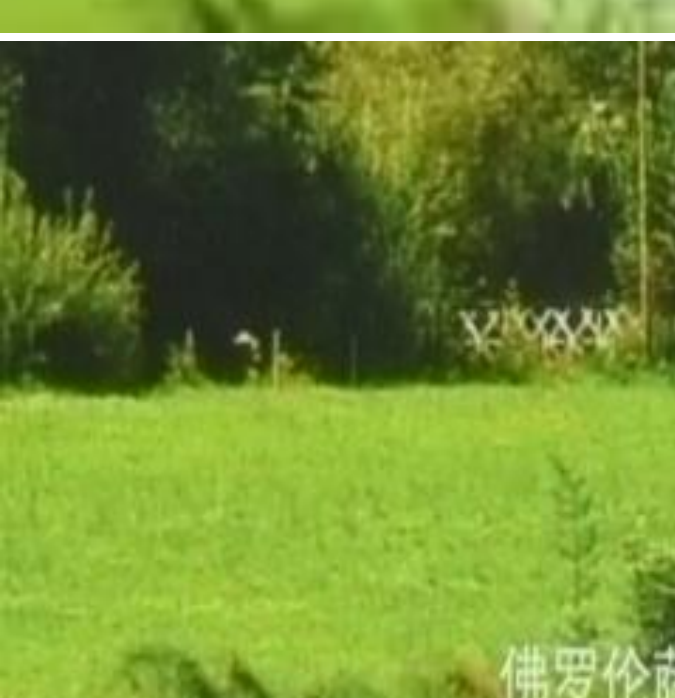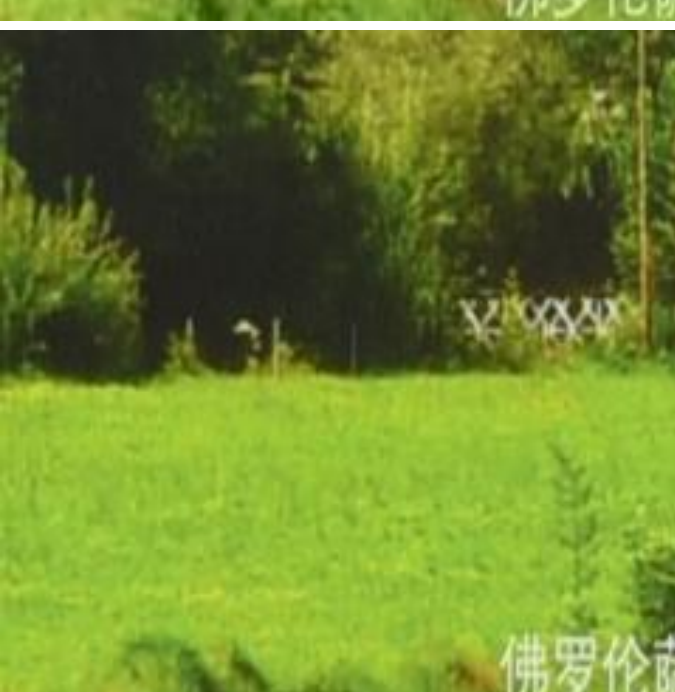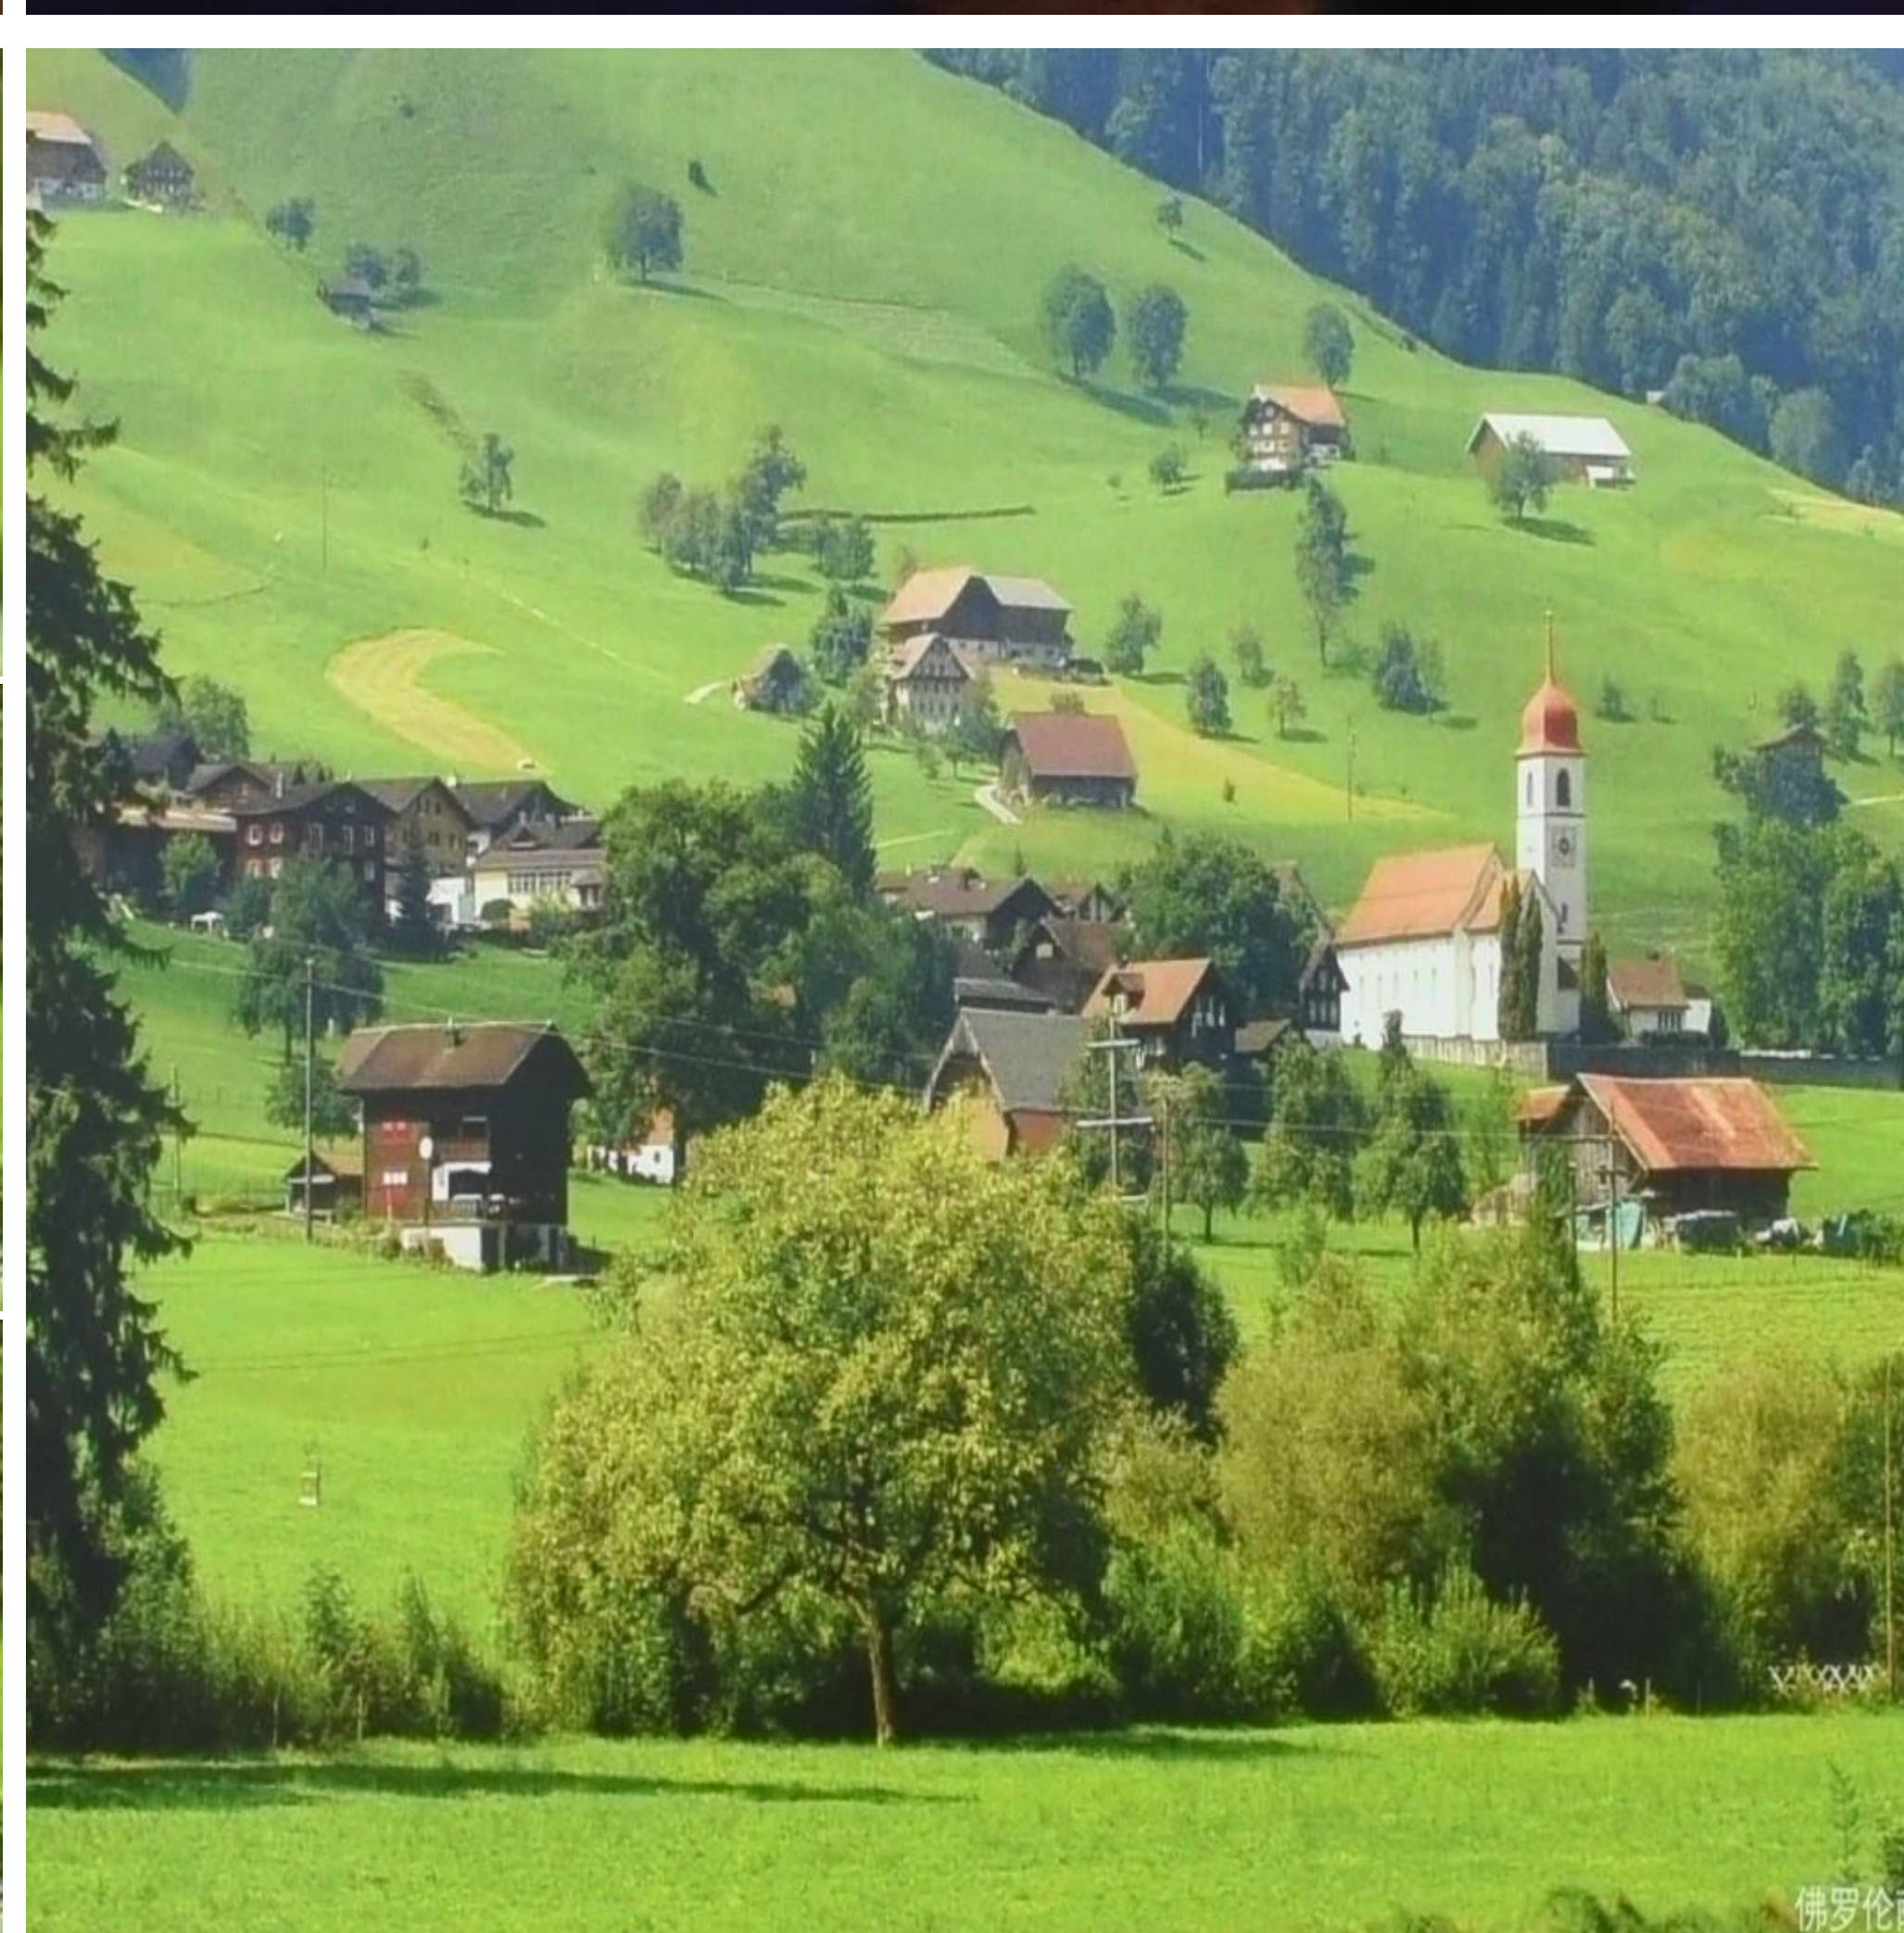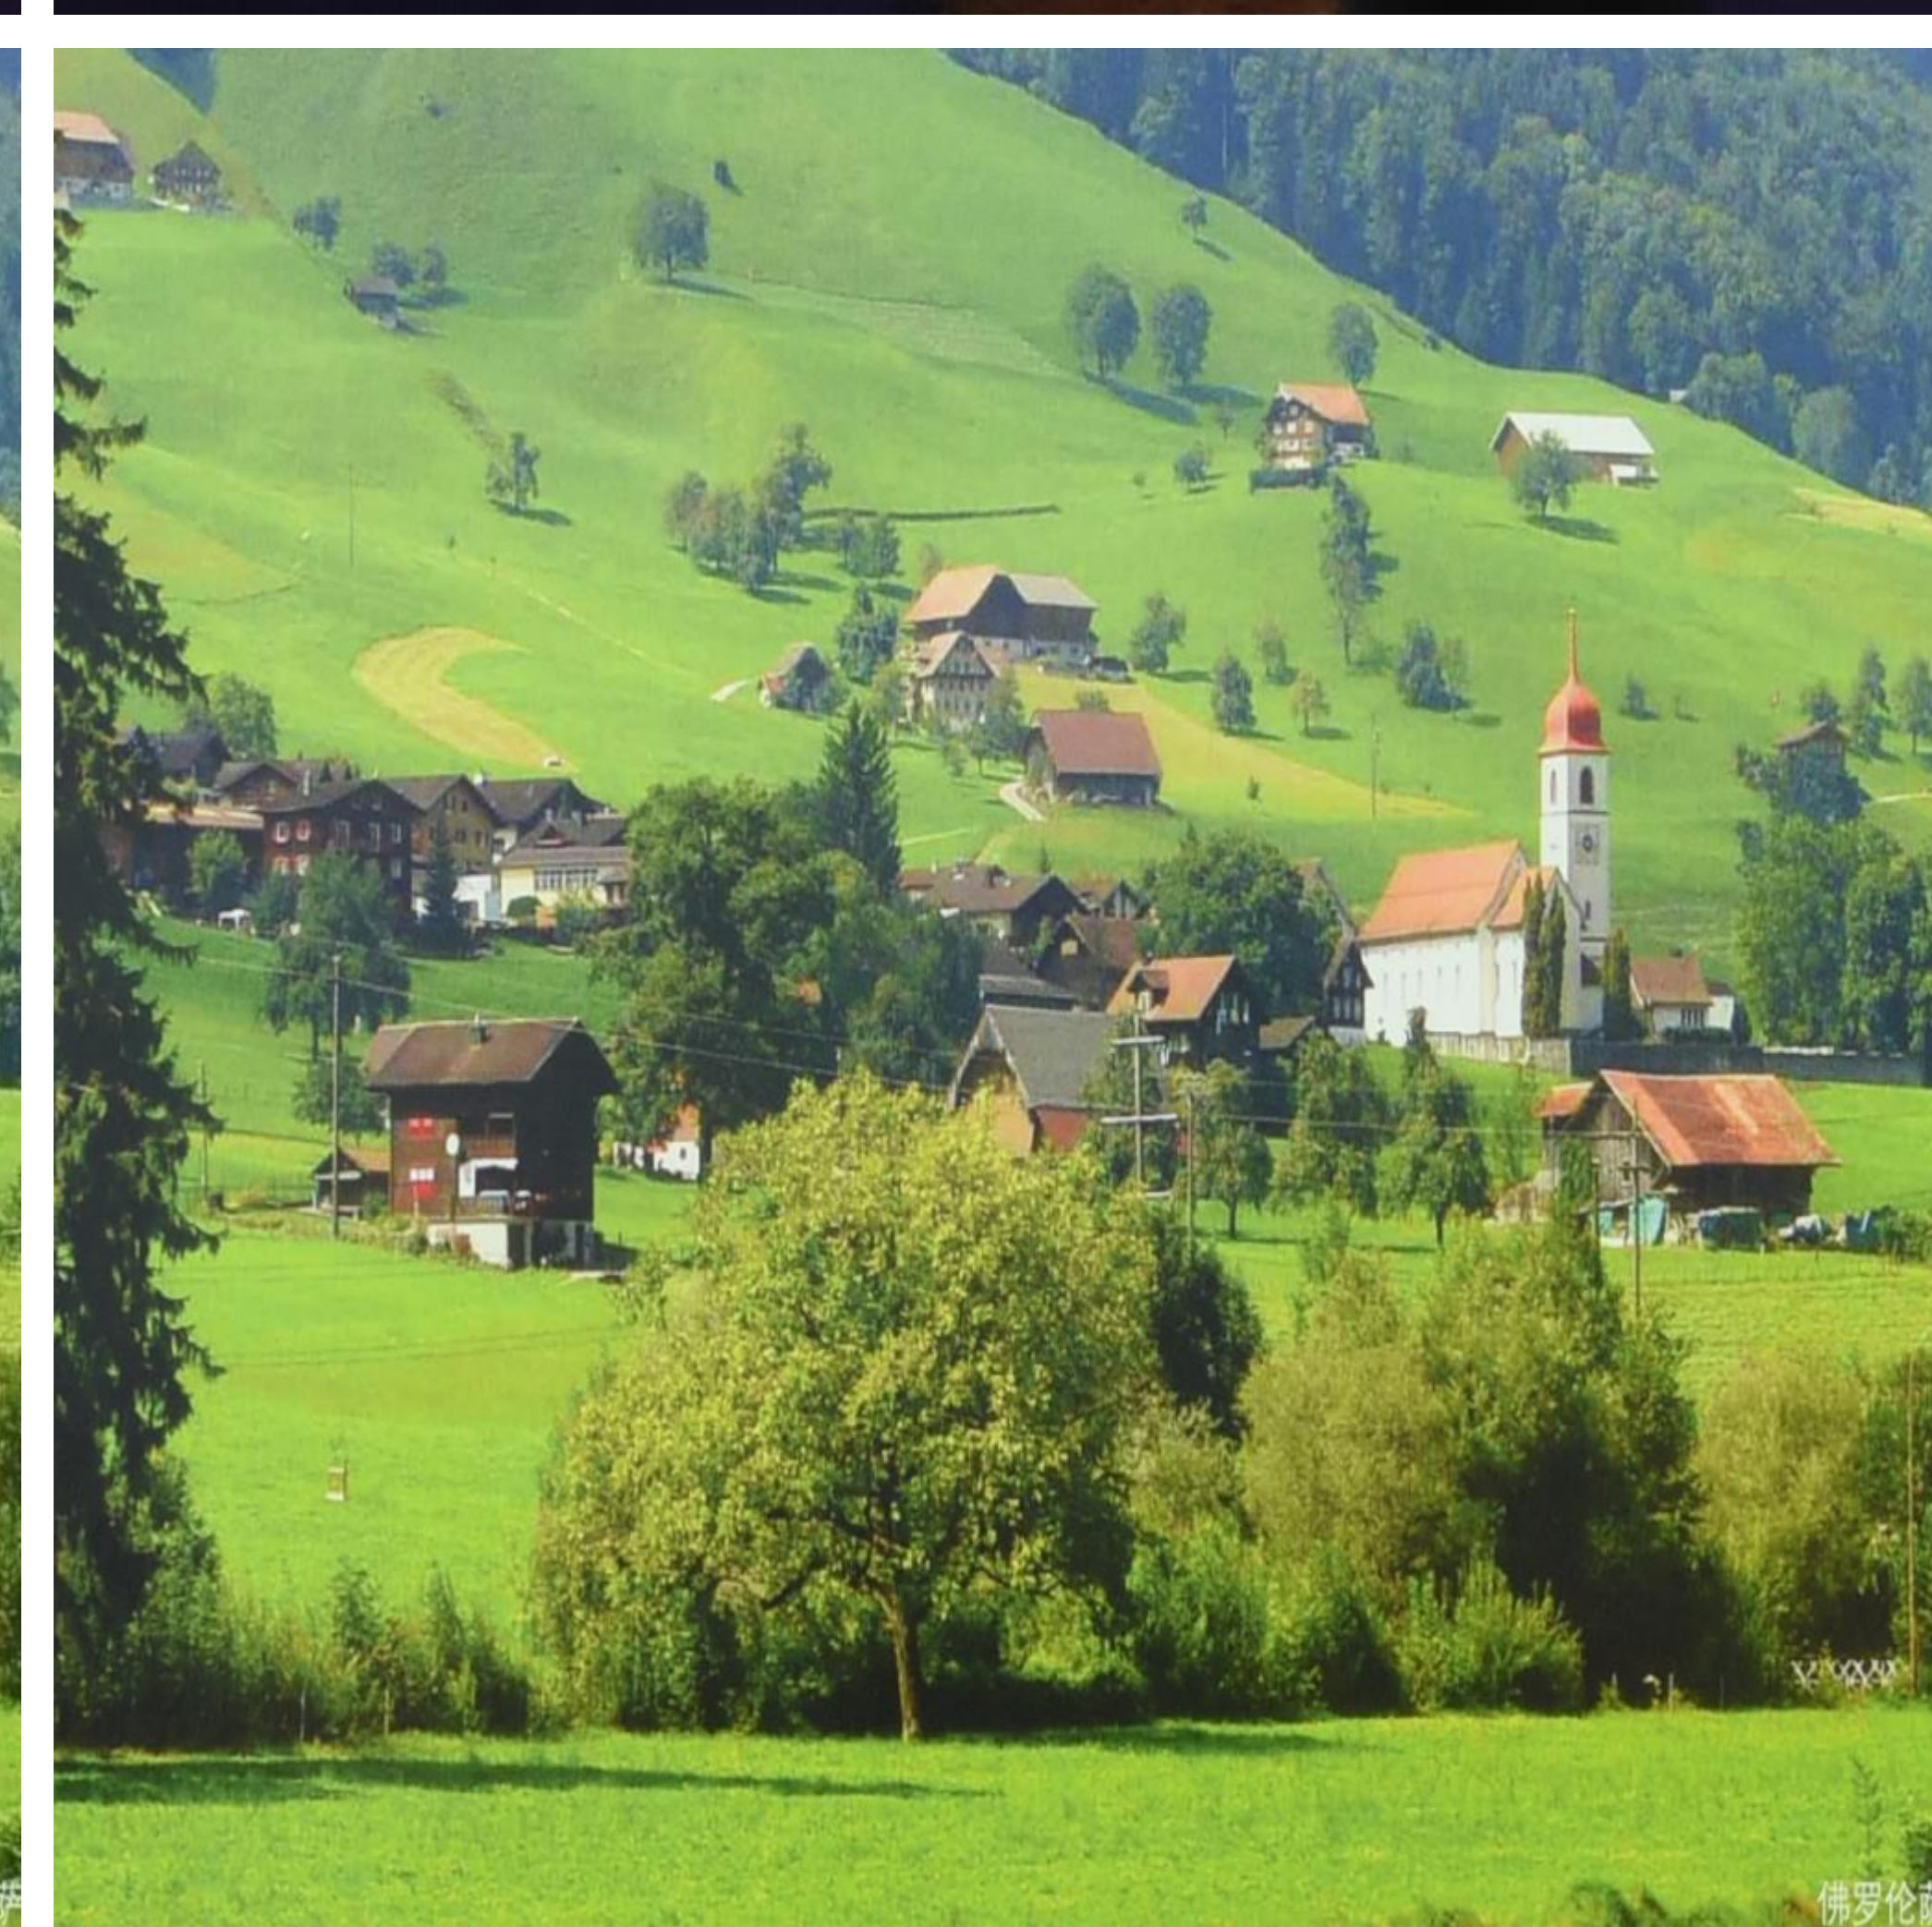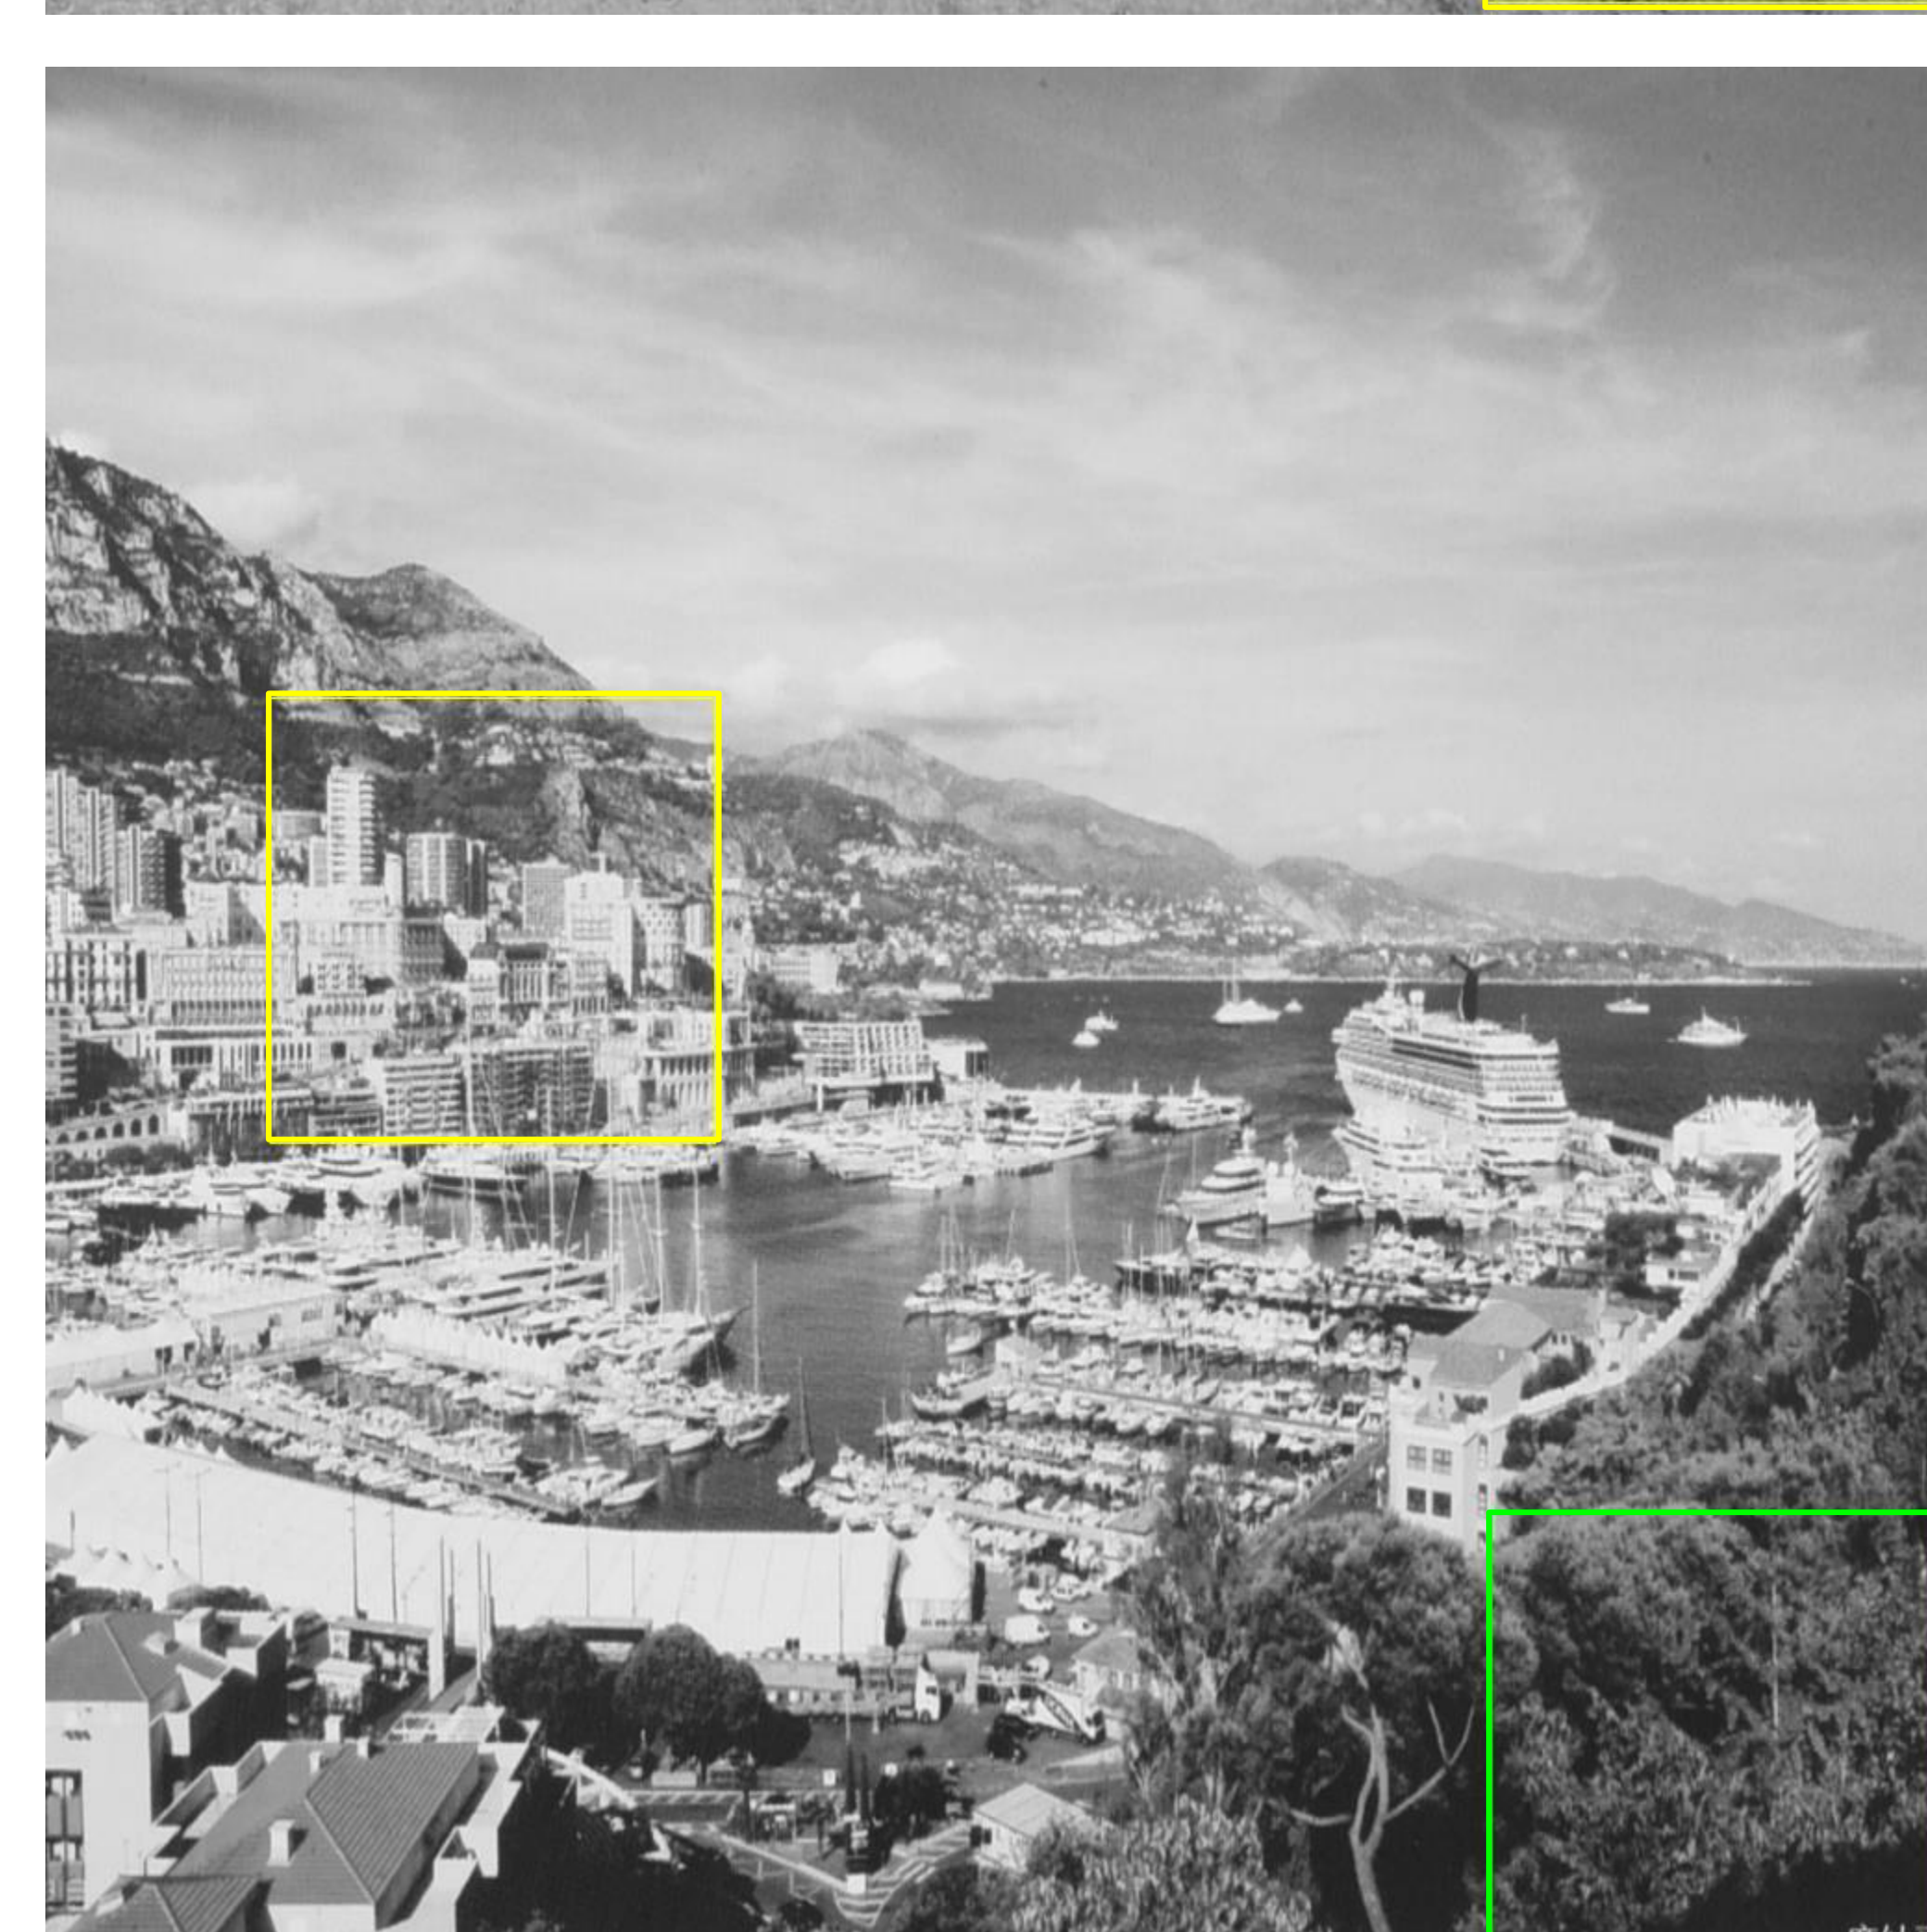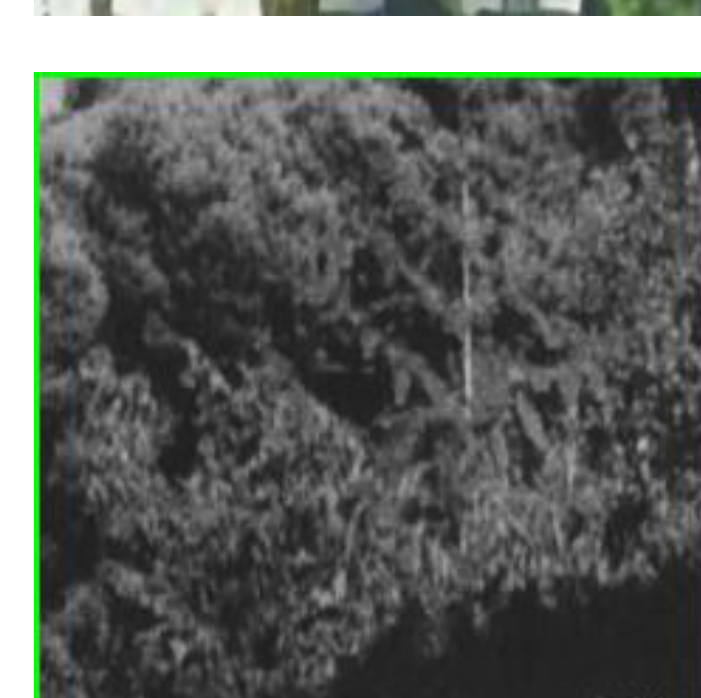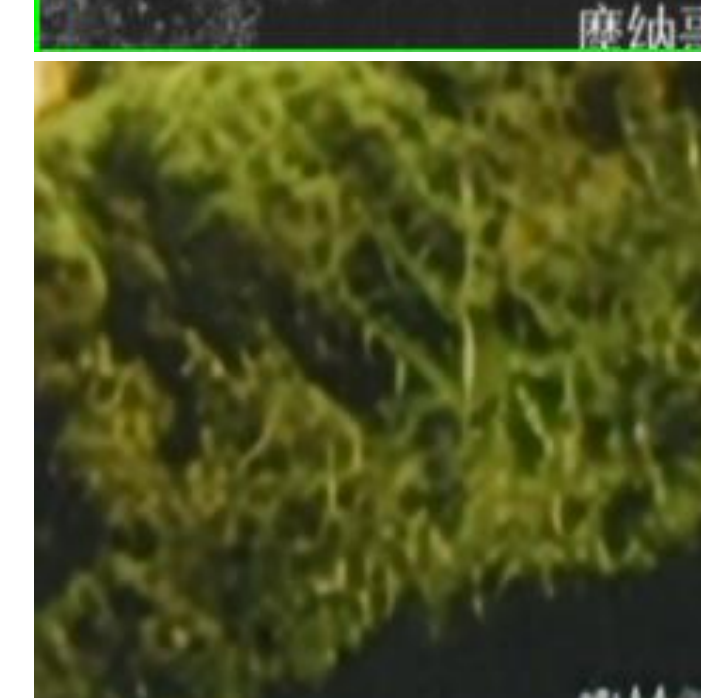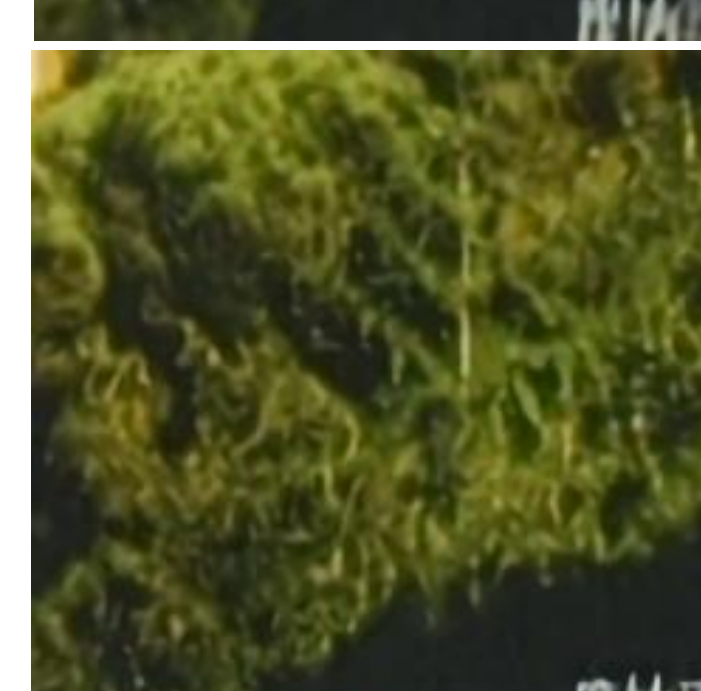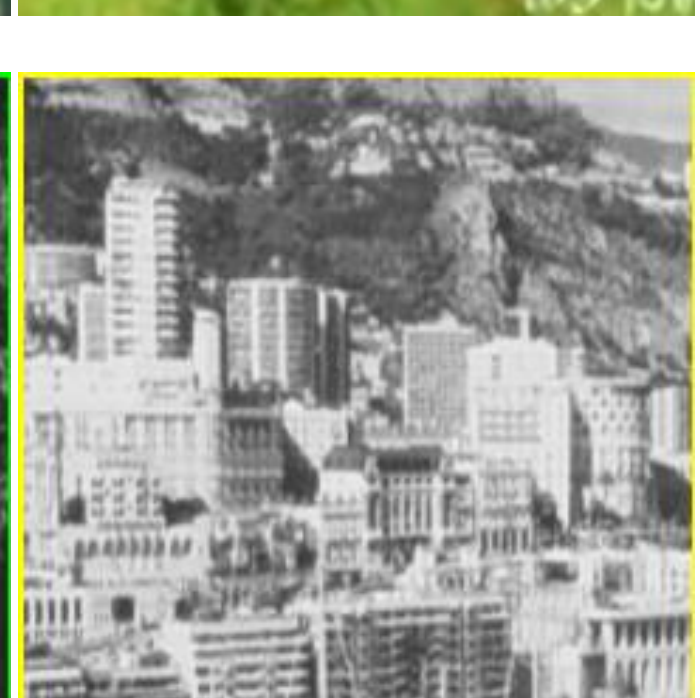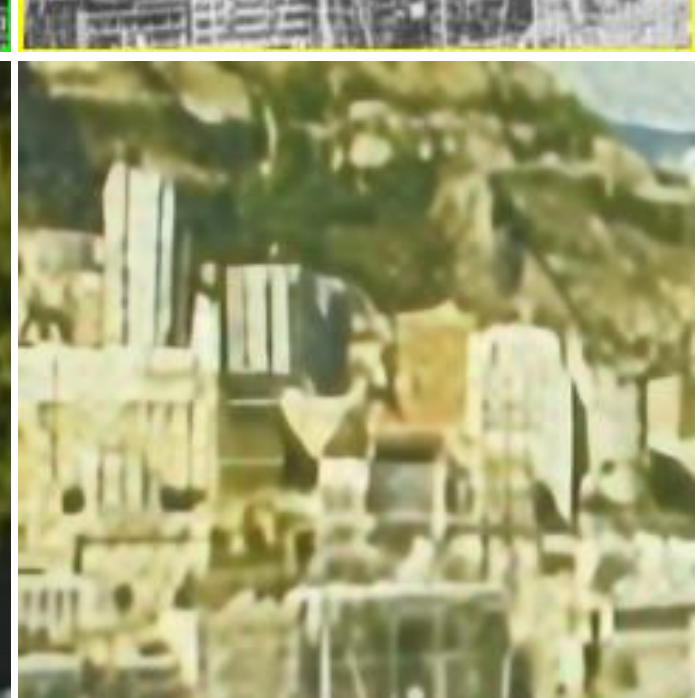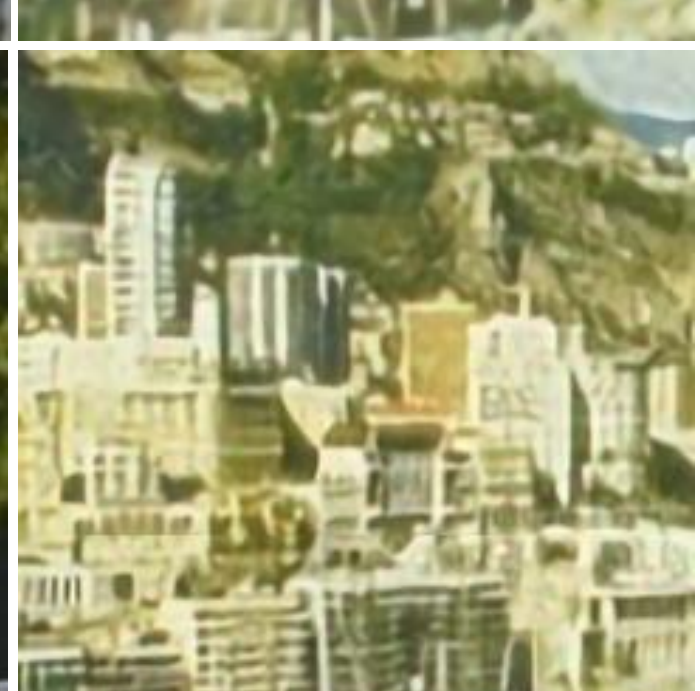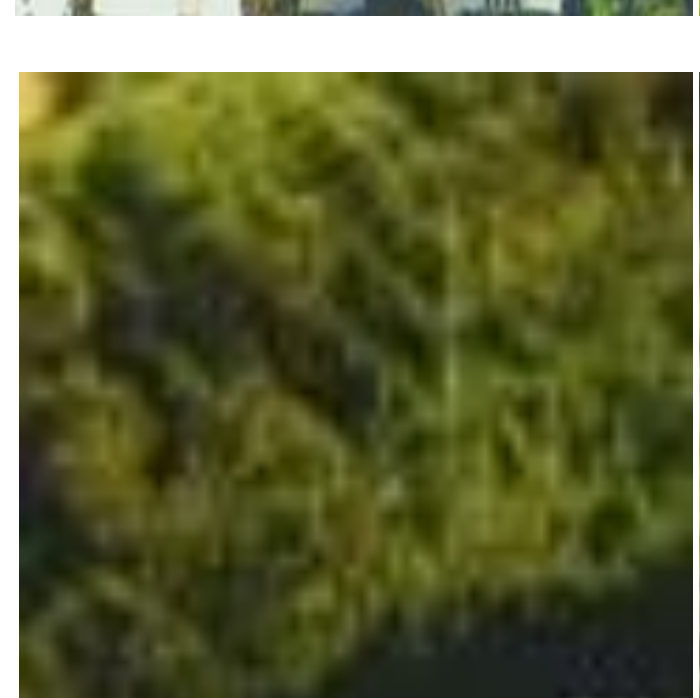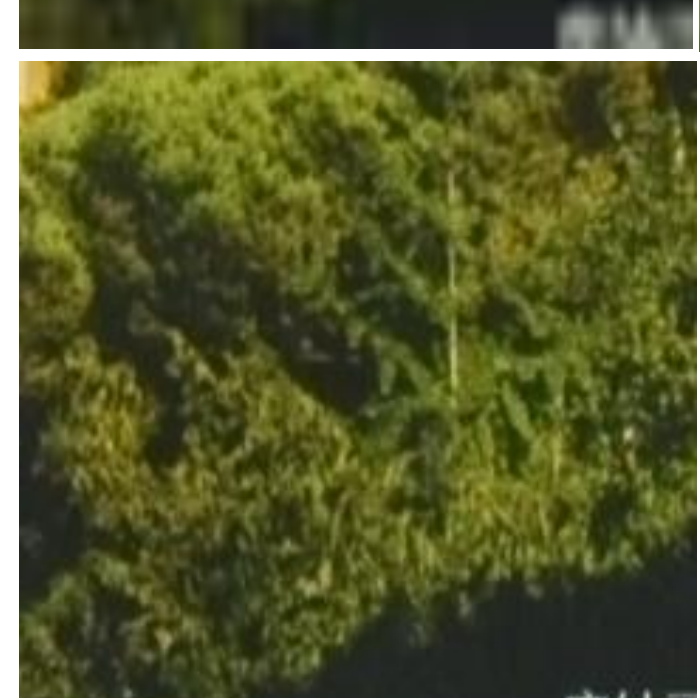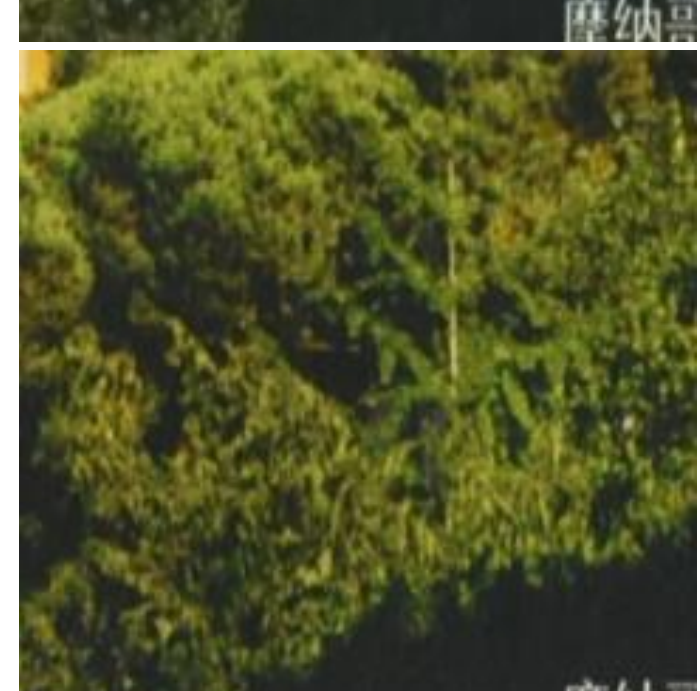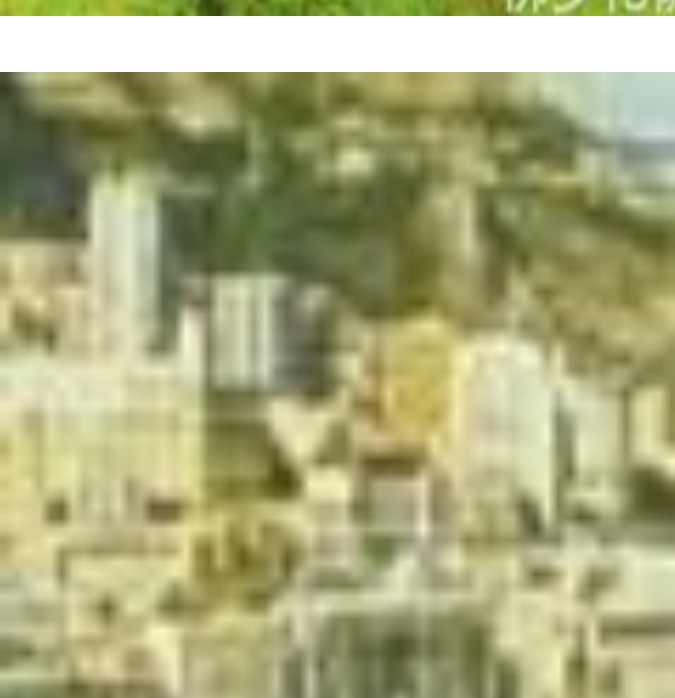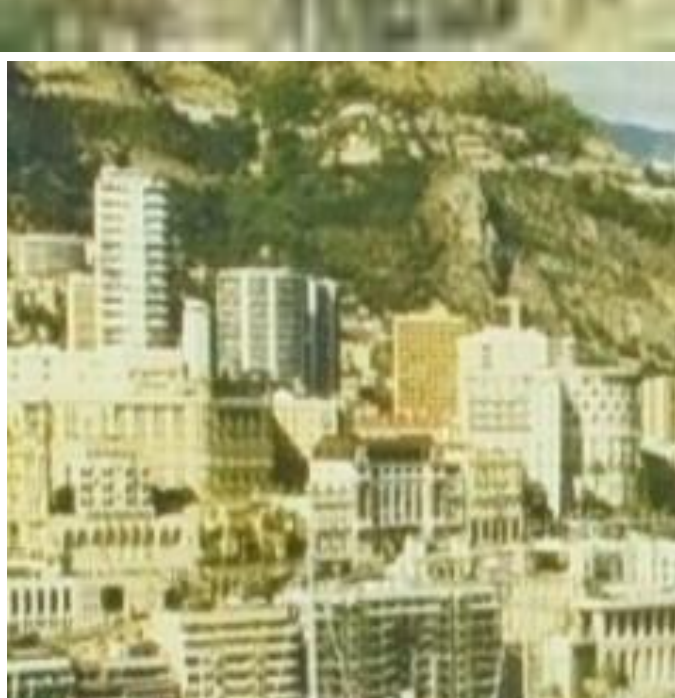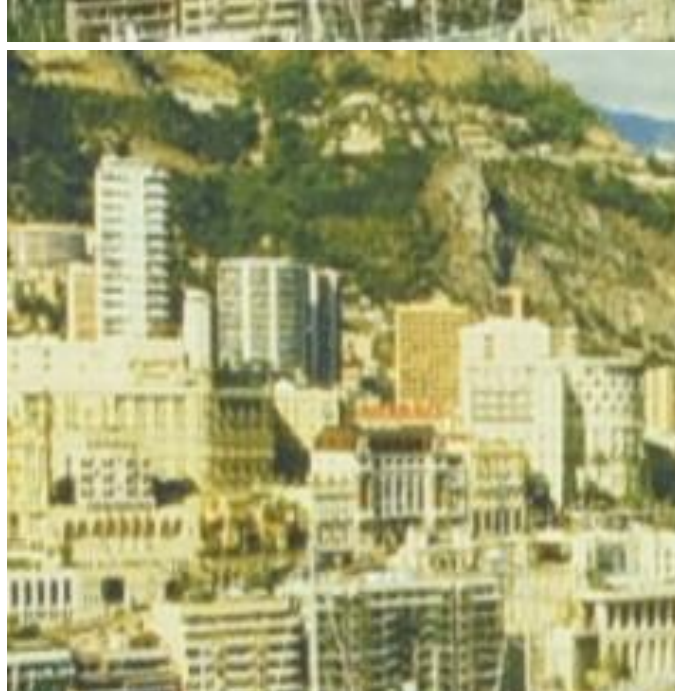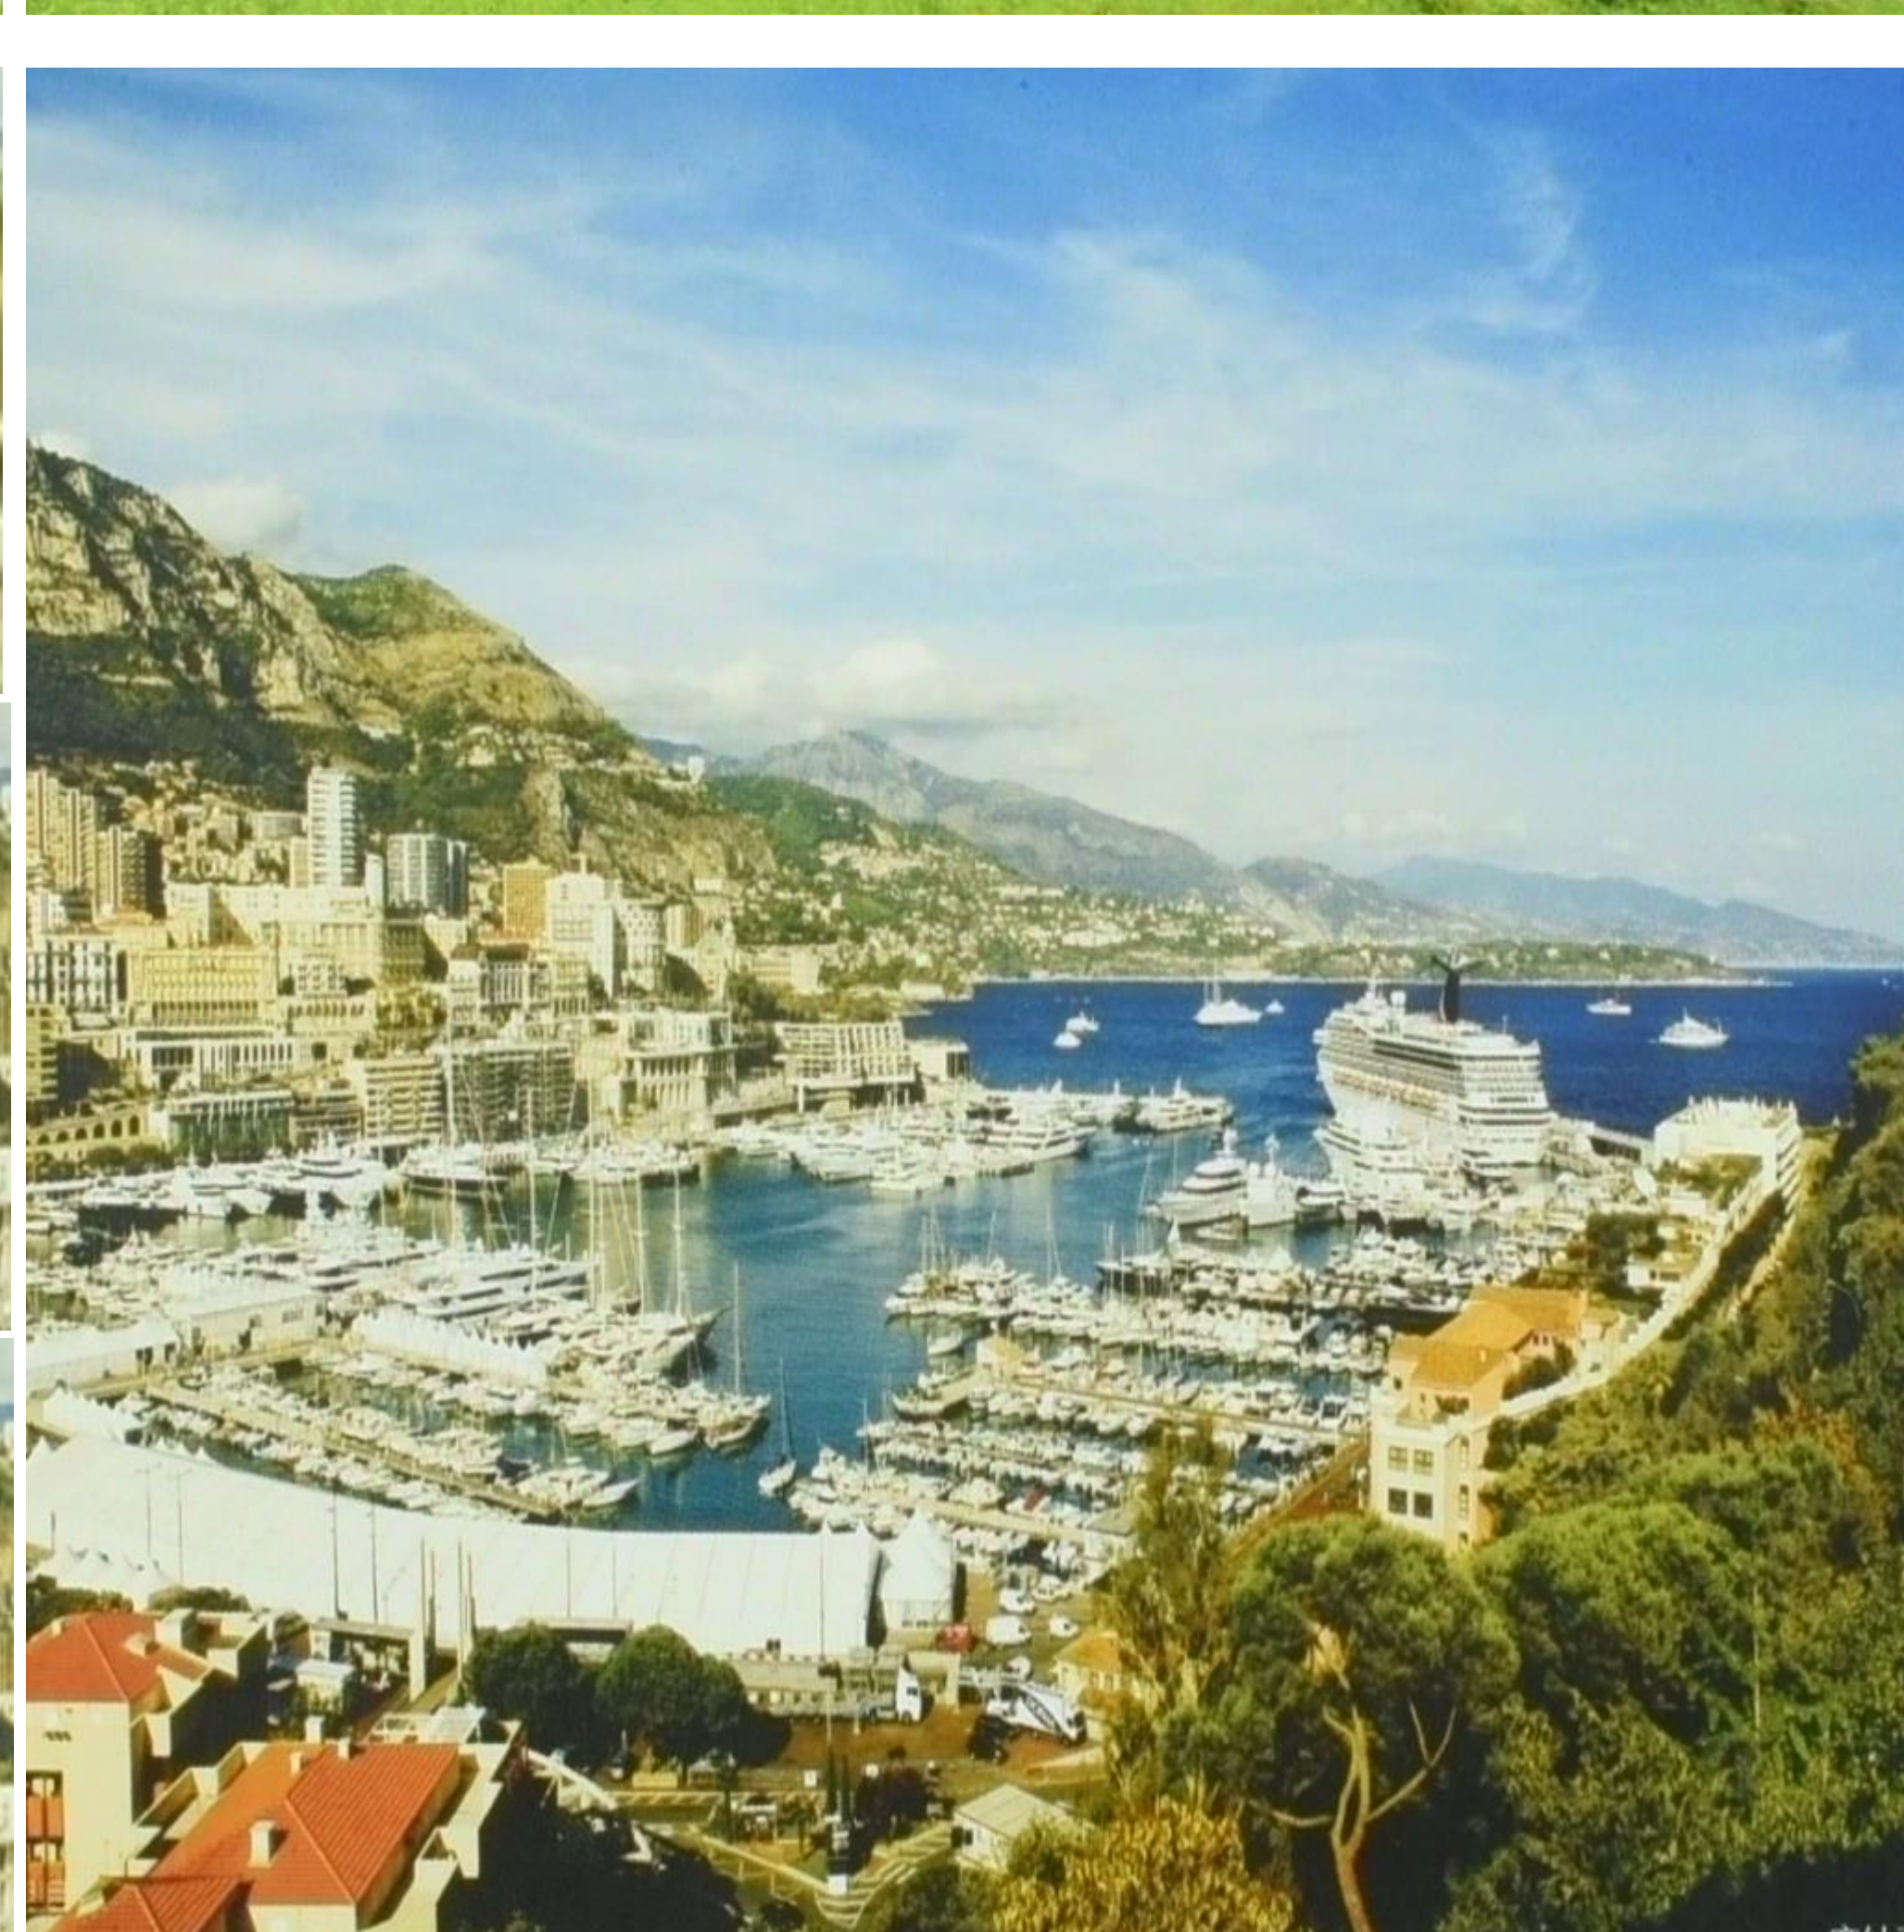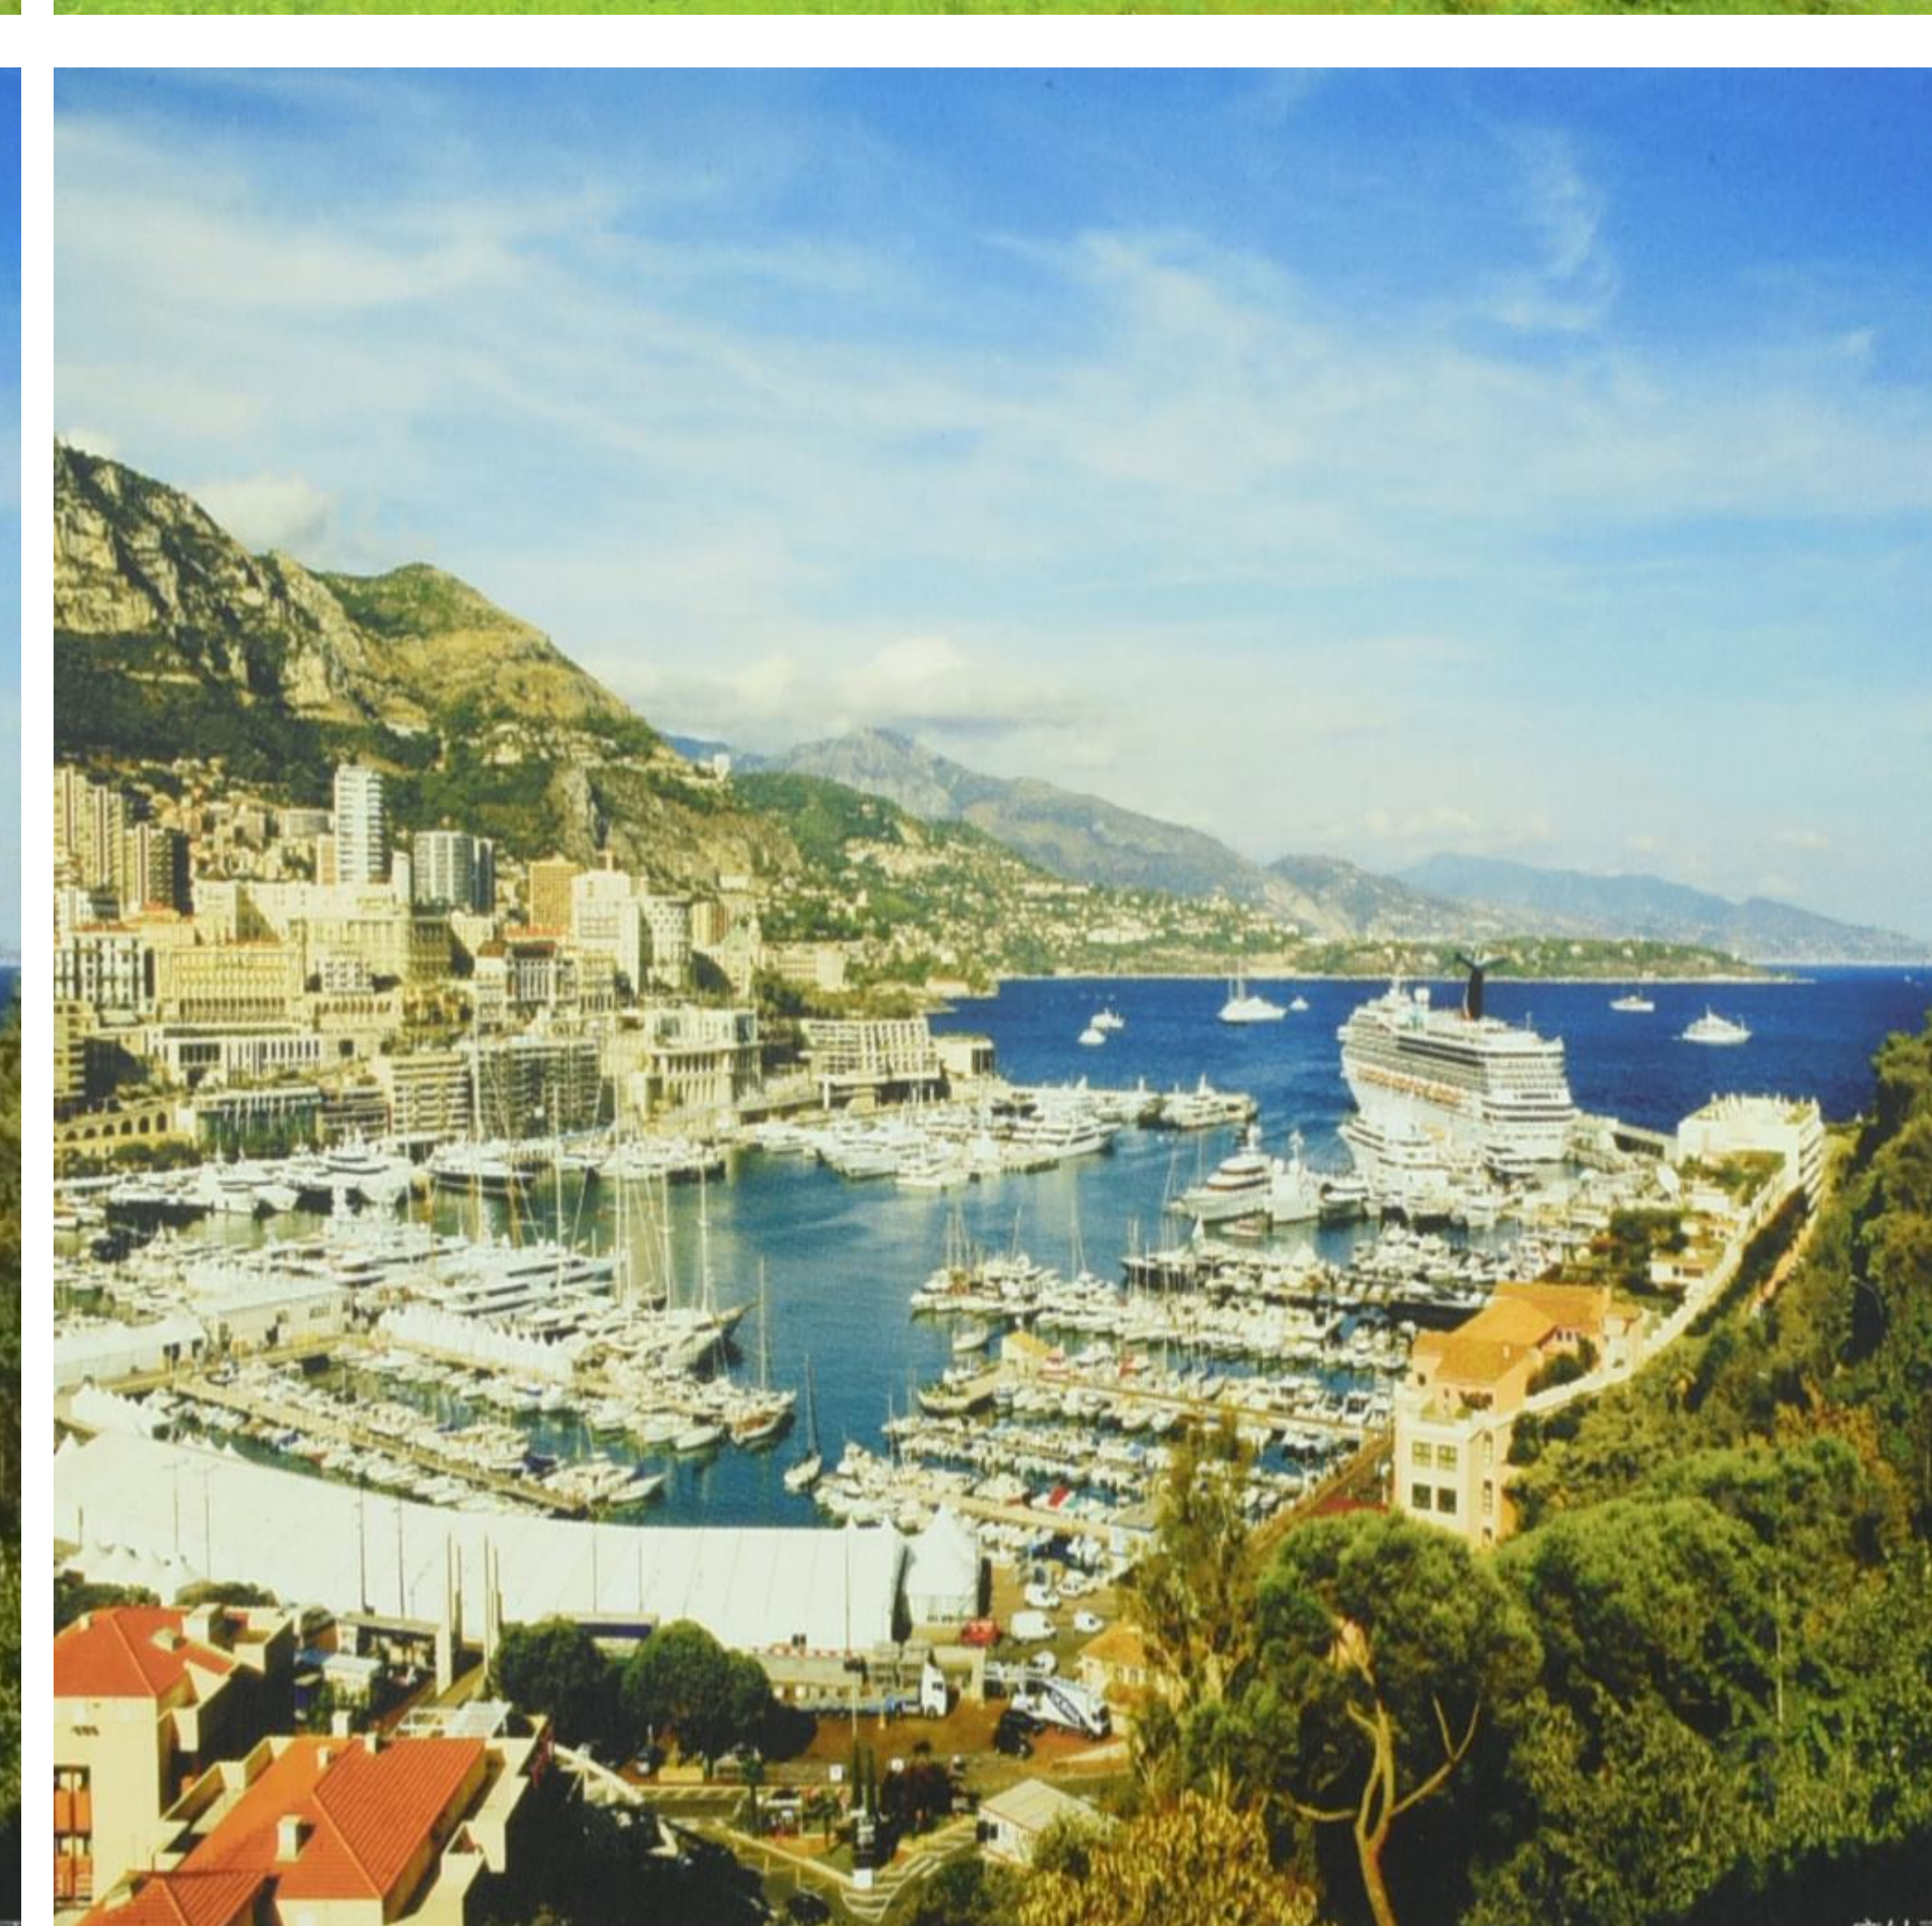

Supplement: Supplementary file 22 [file Guo_Low-light_Color_Imaging_ACCV_2020_supplemental.zip]

(a)

(b)

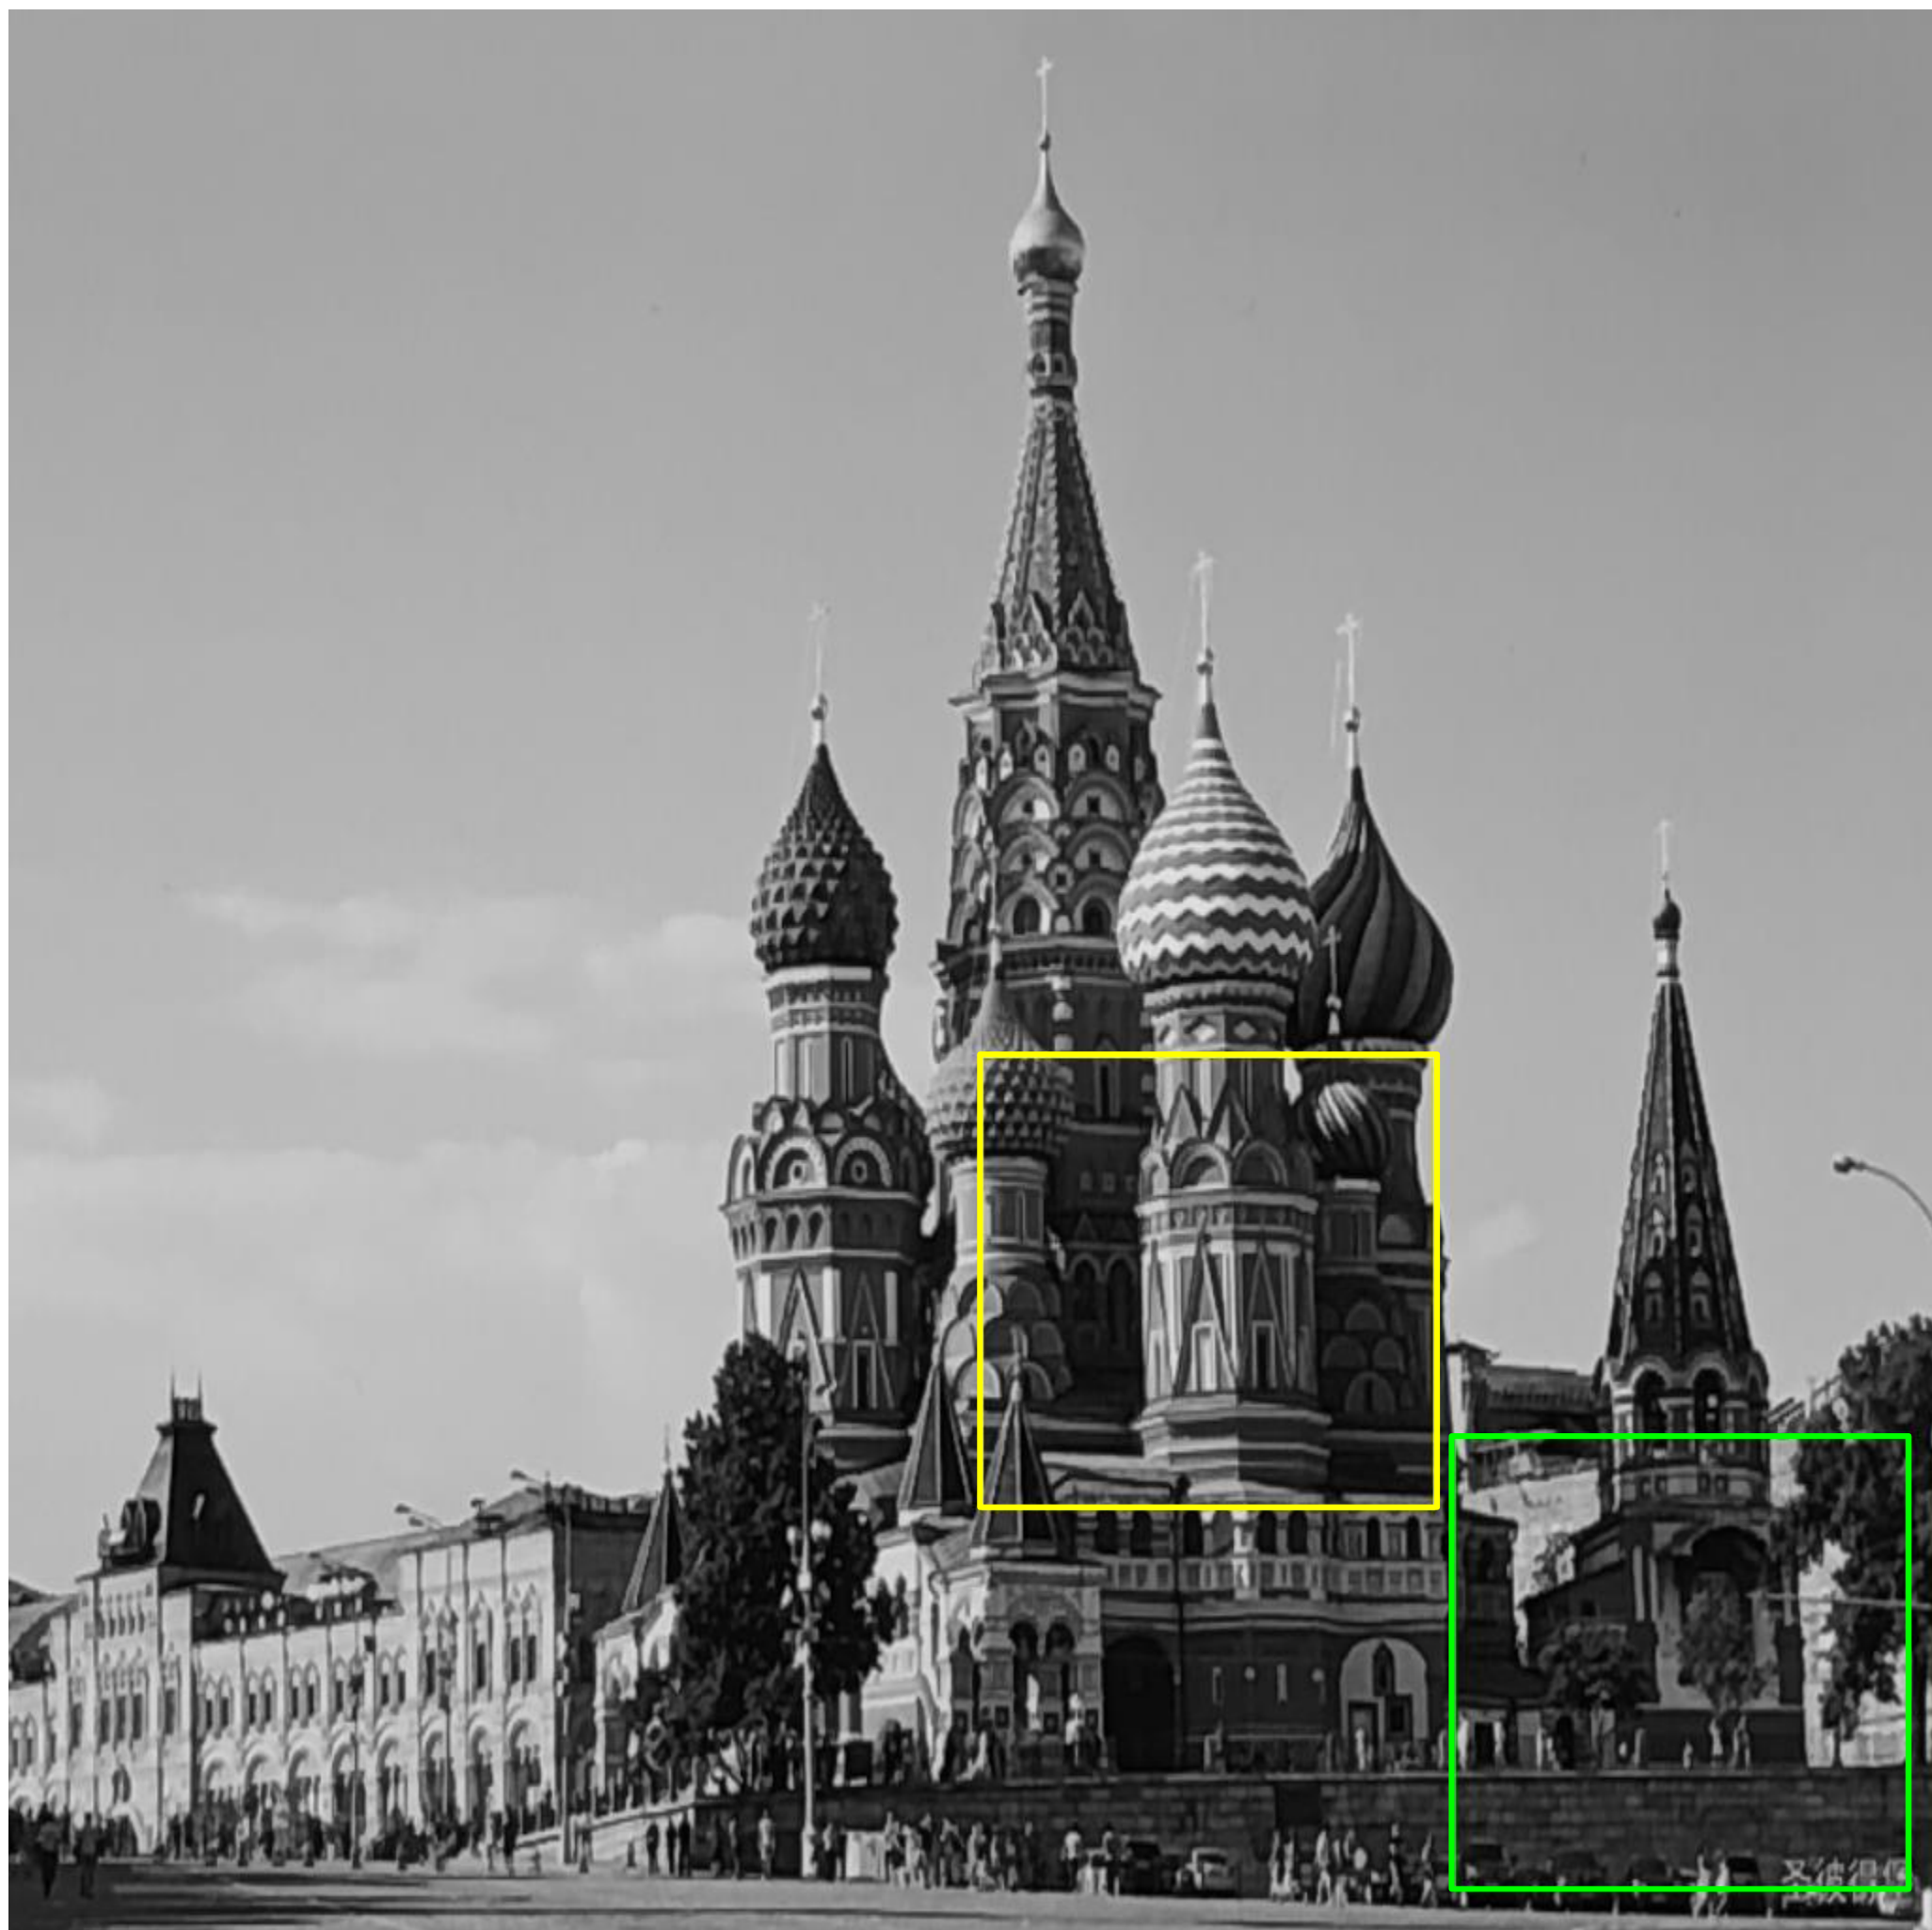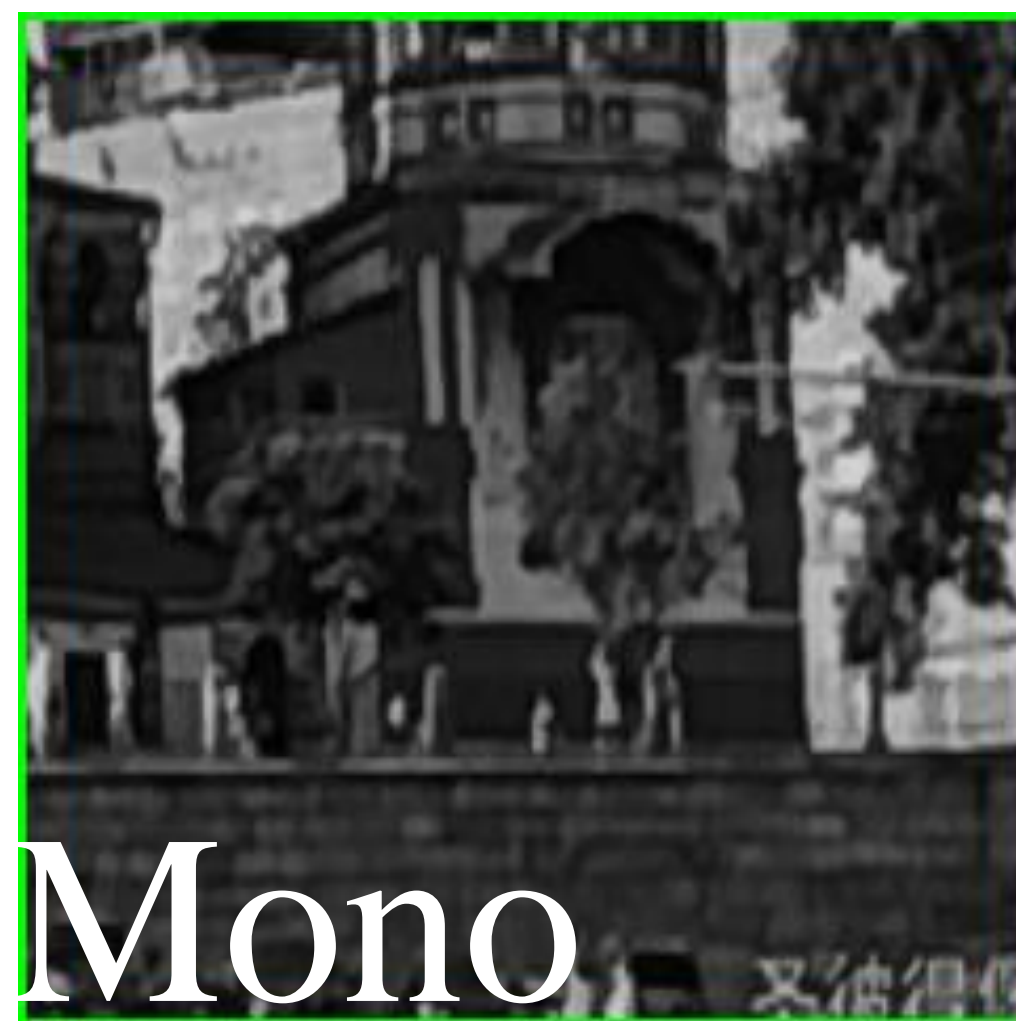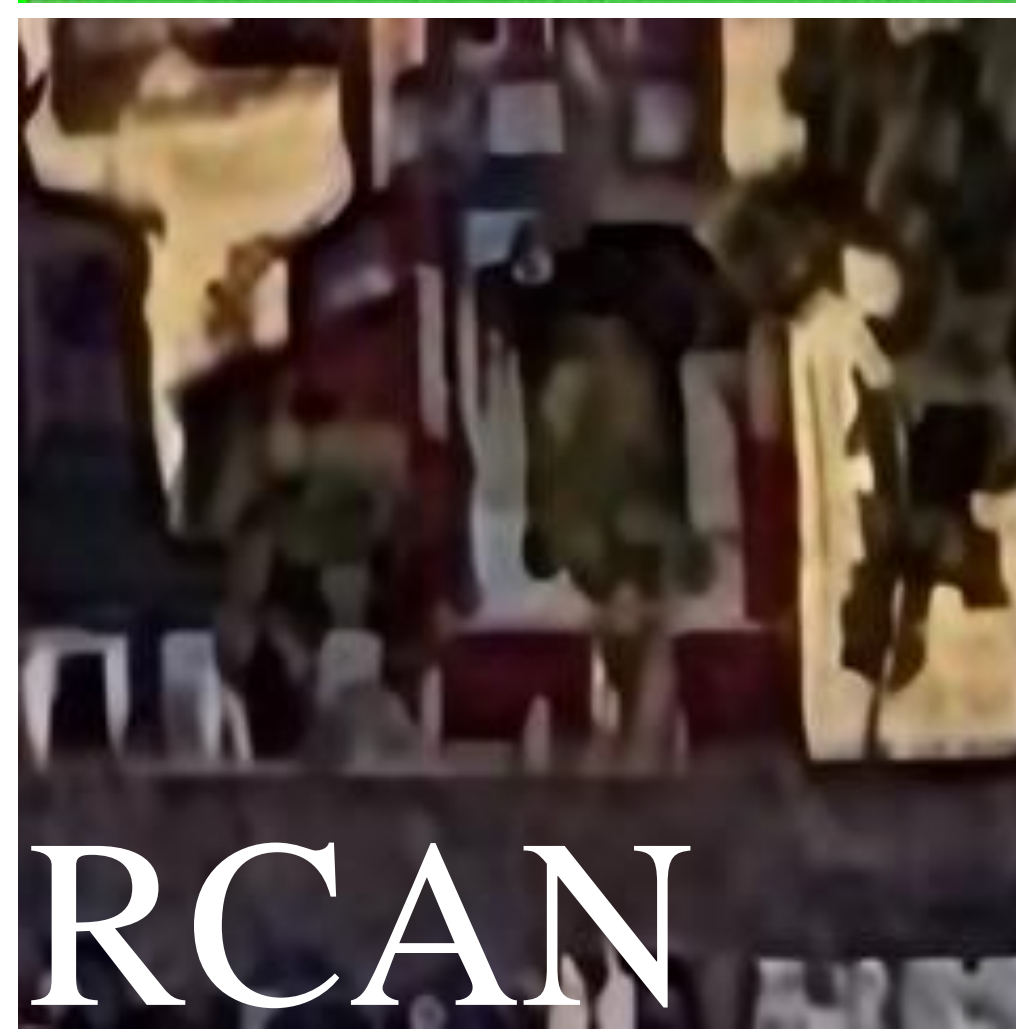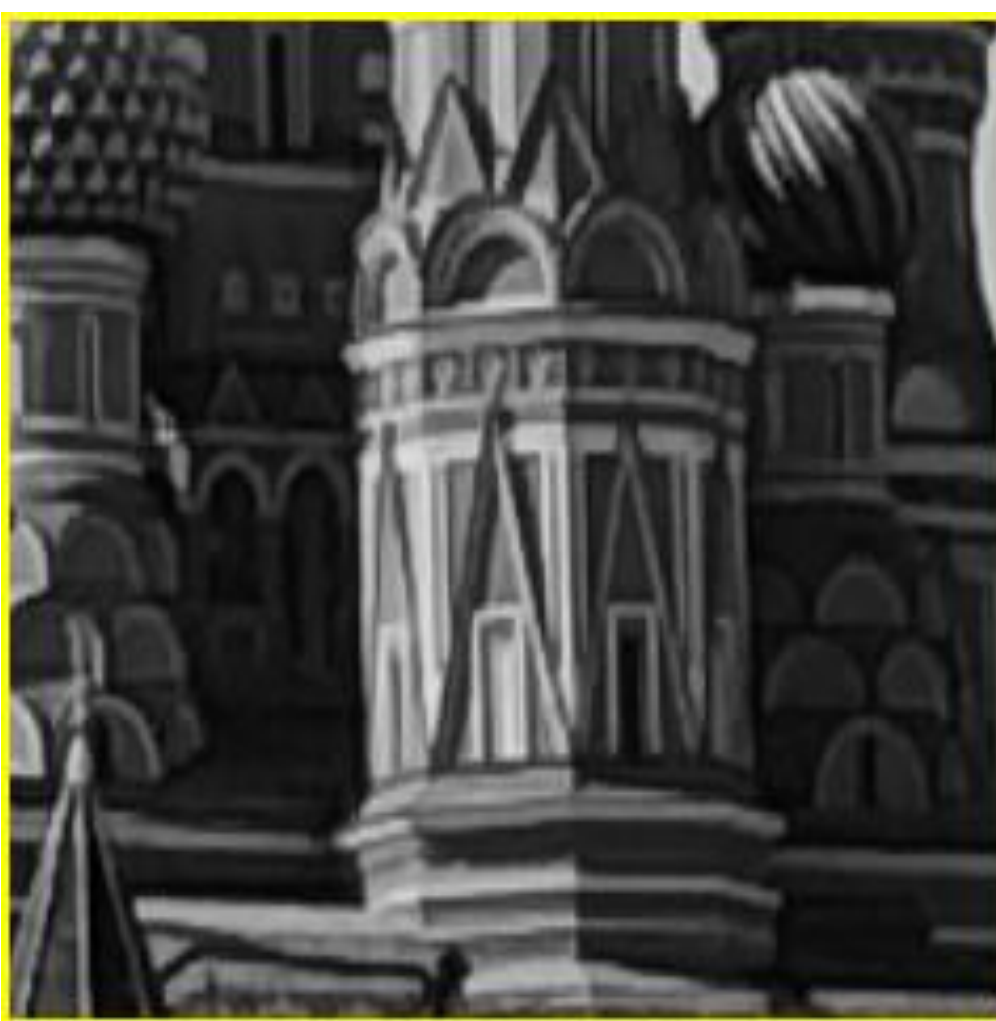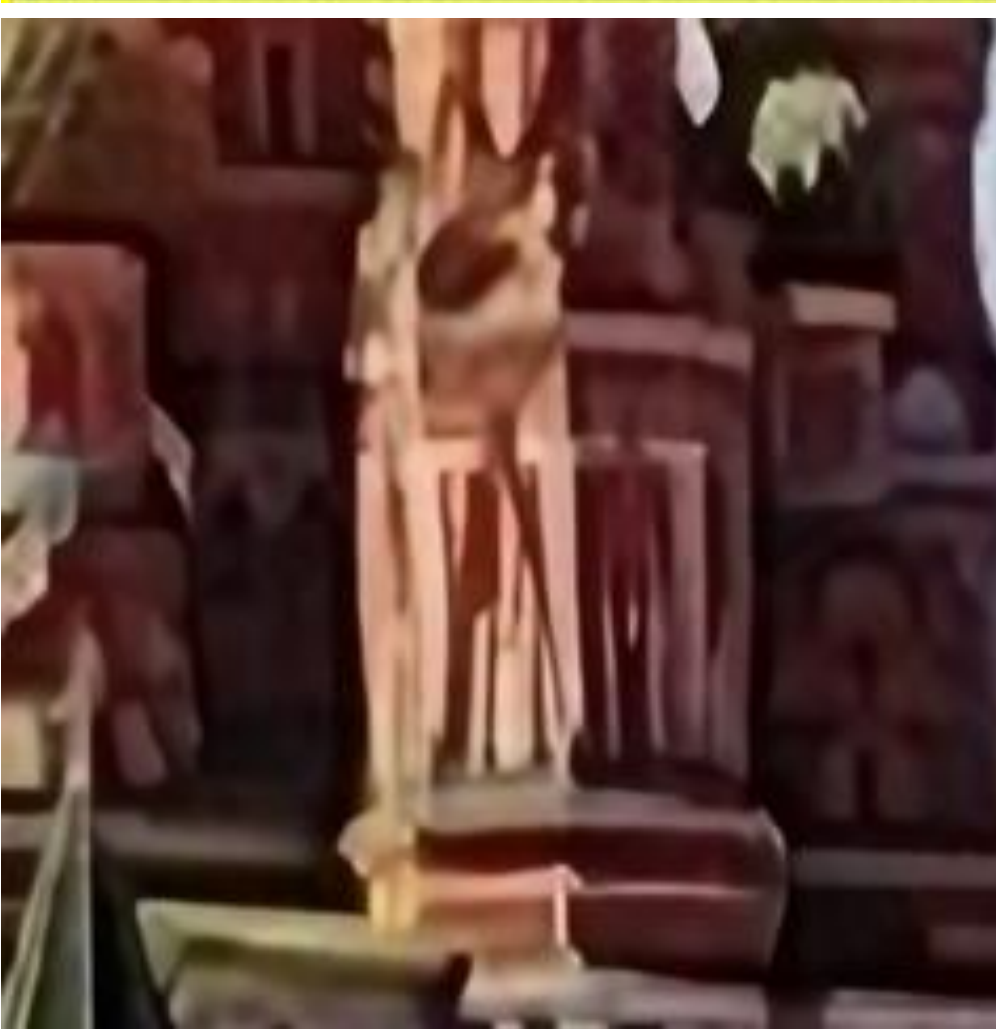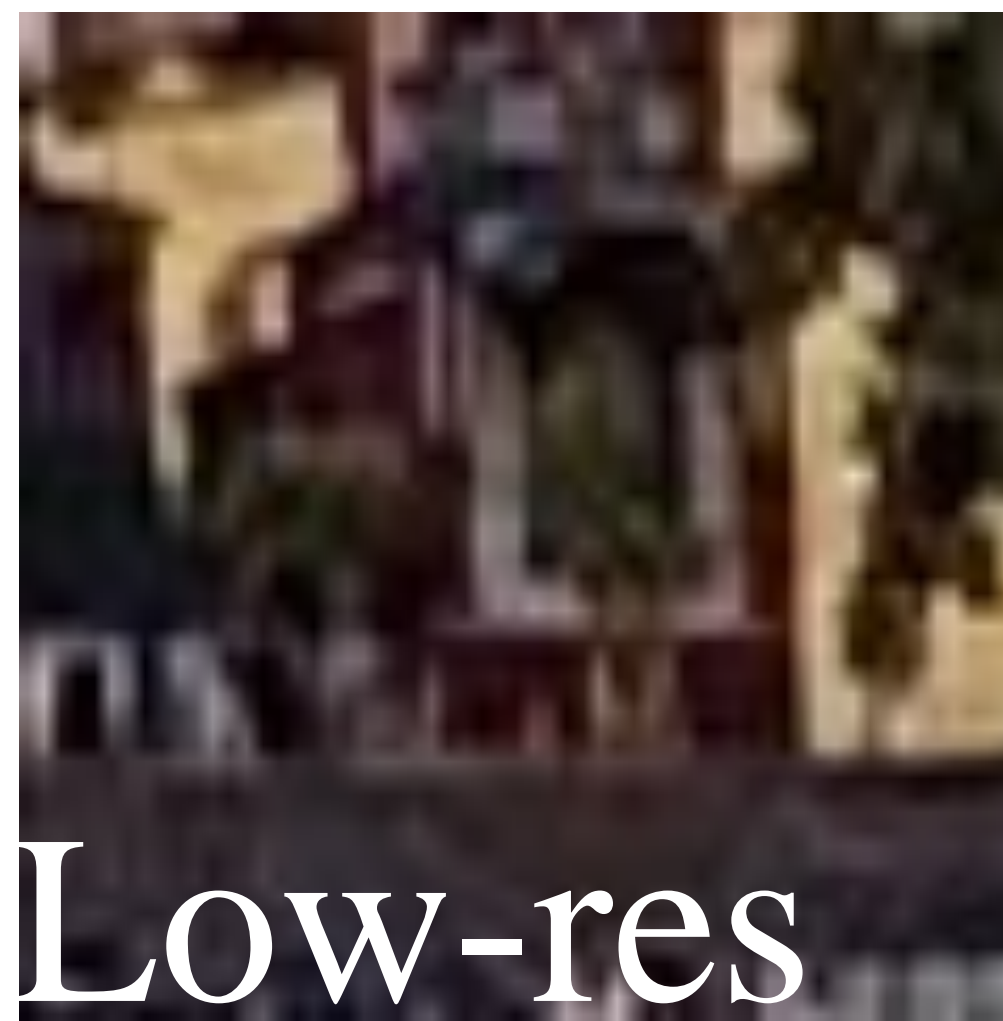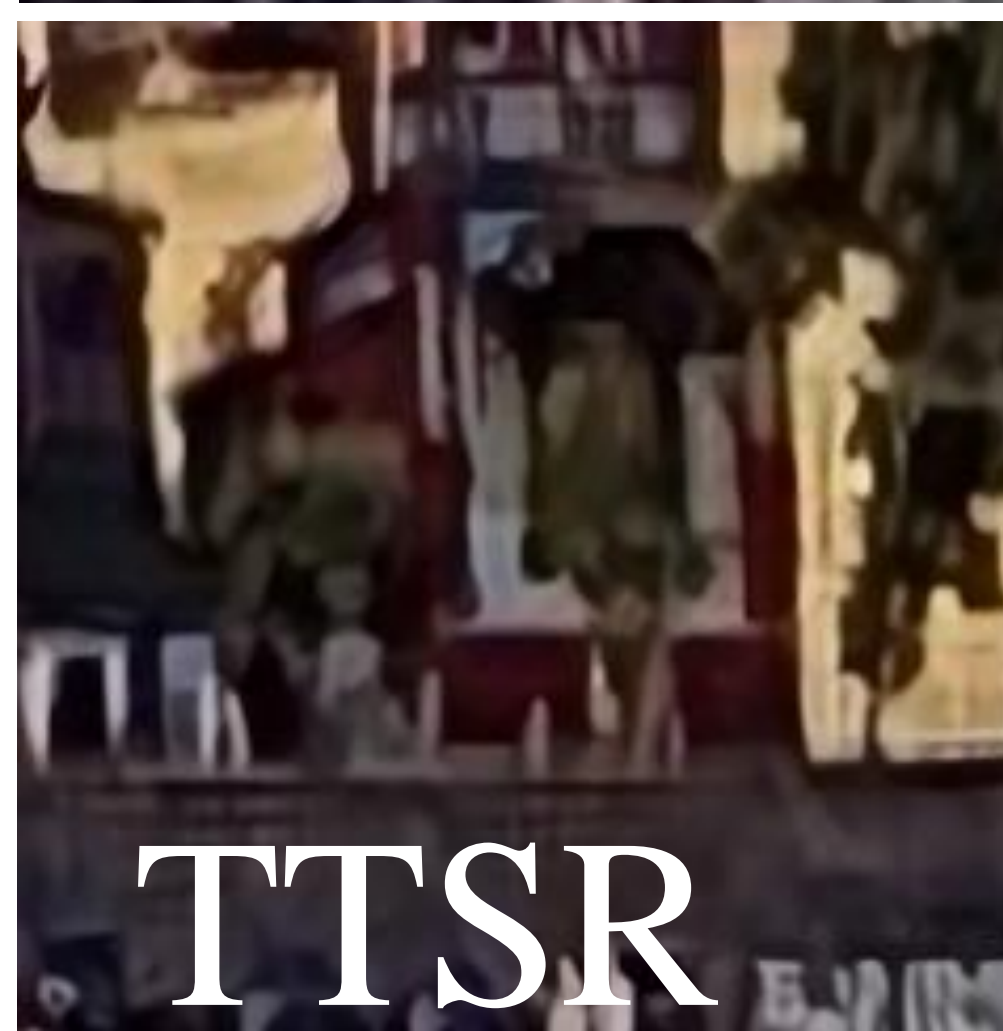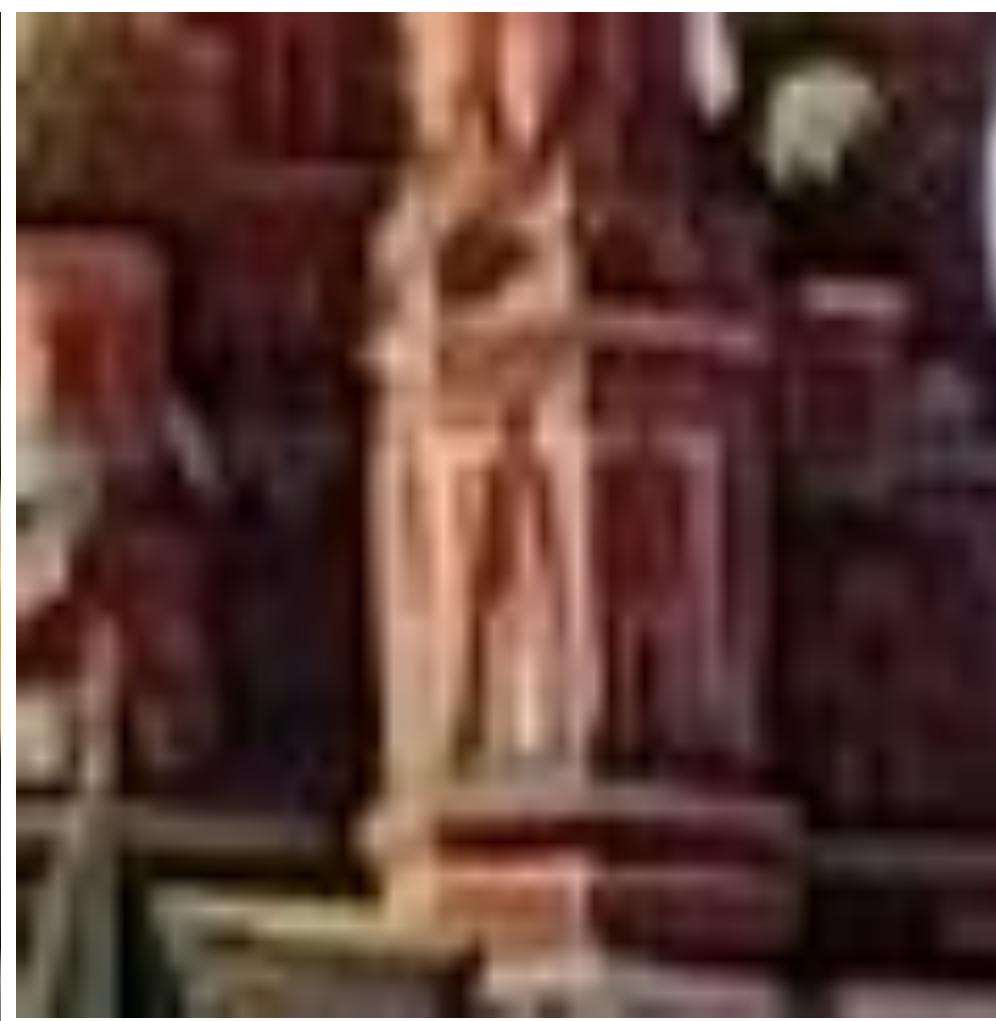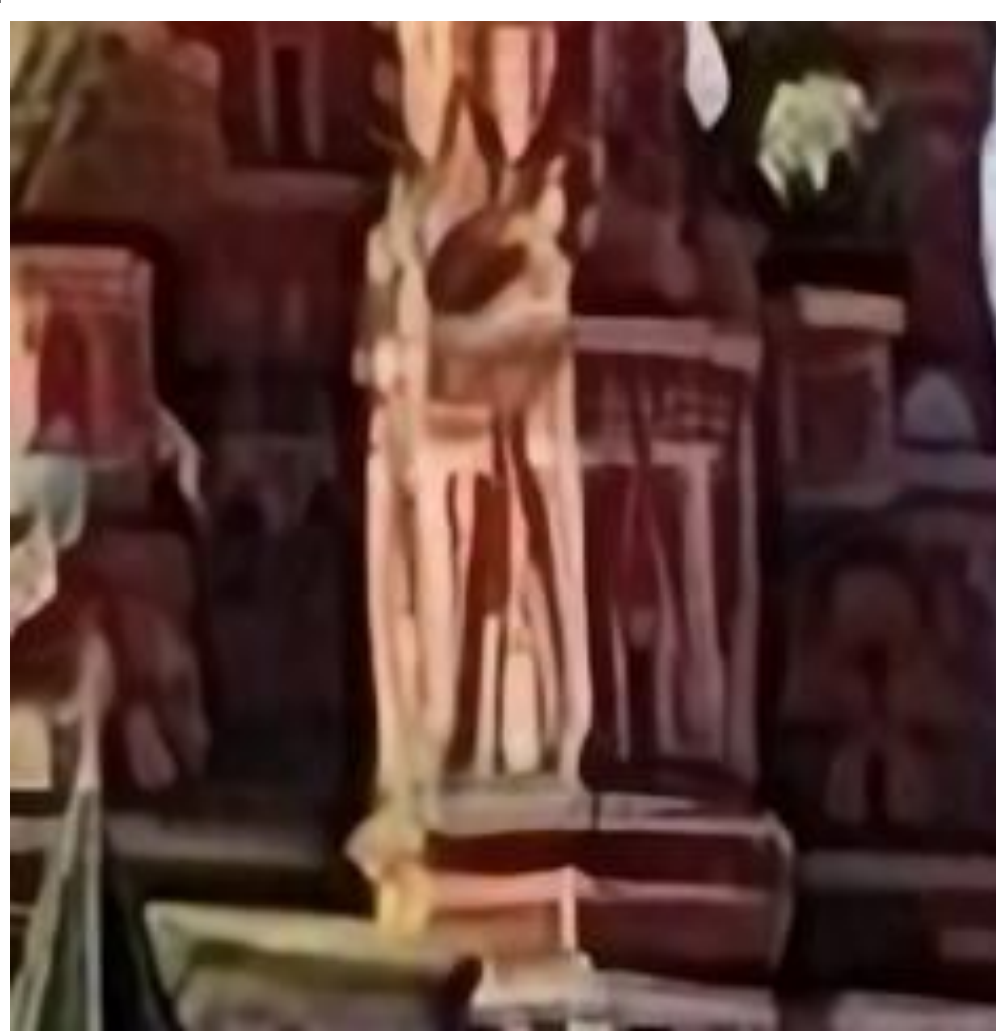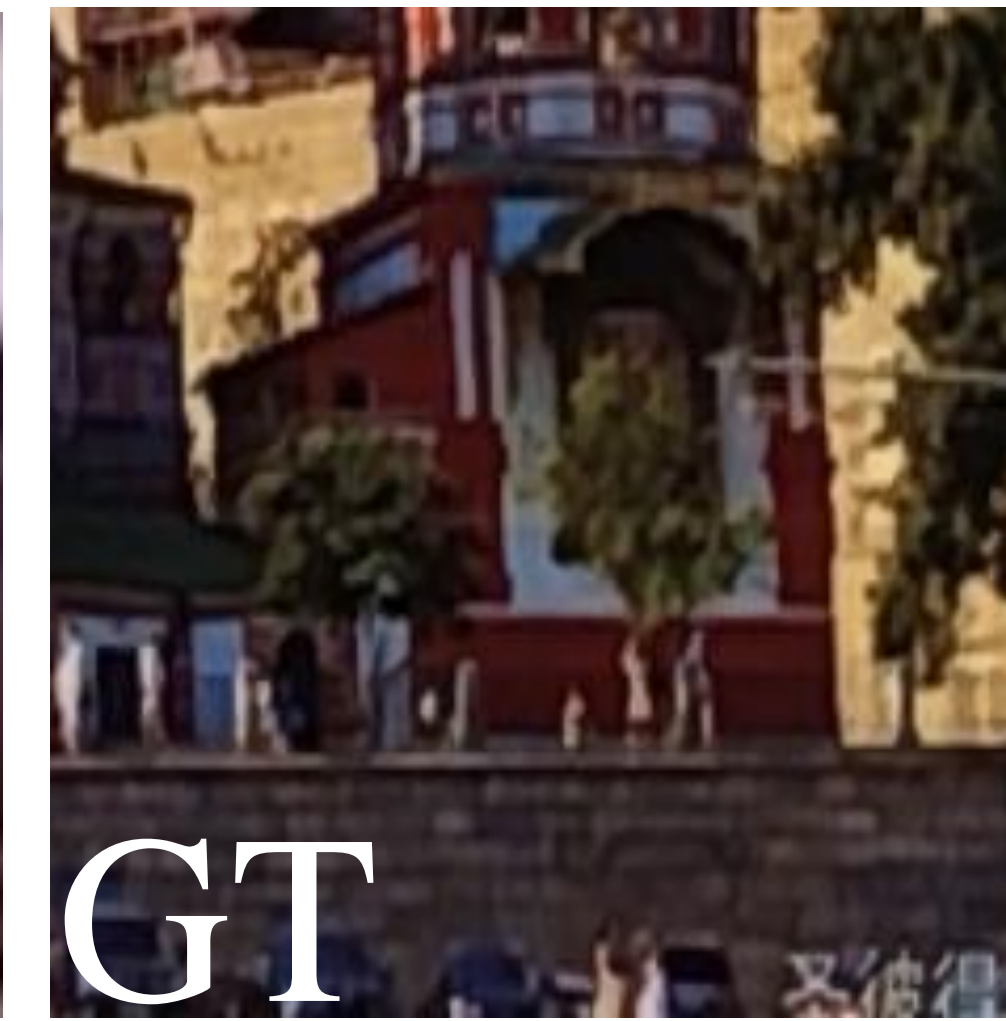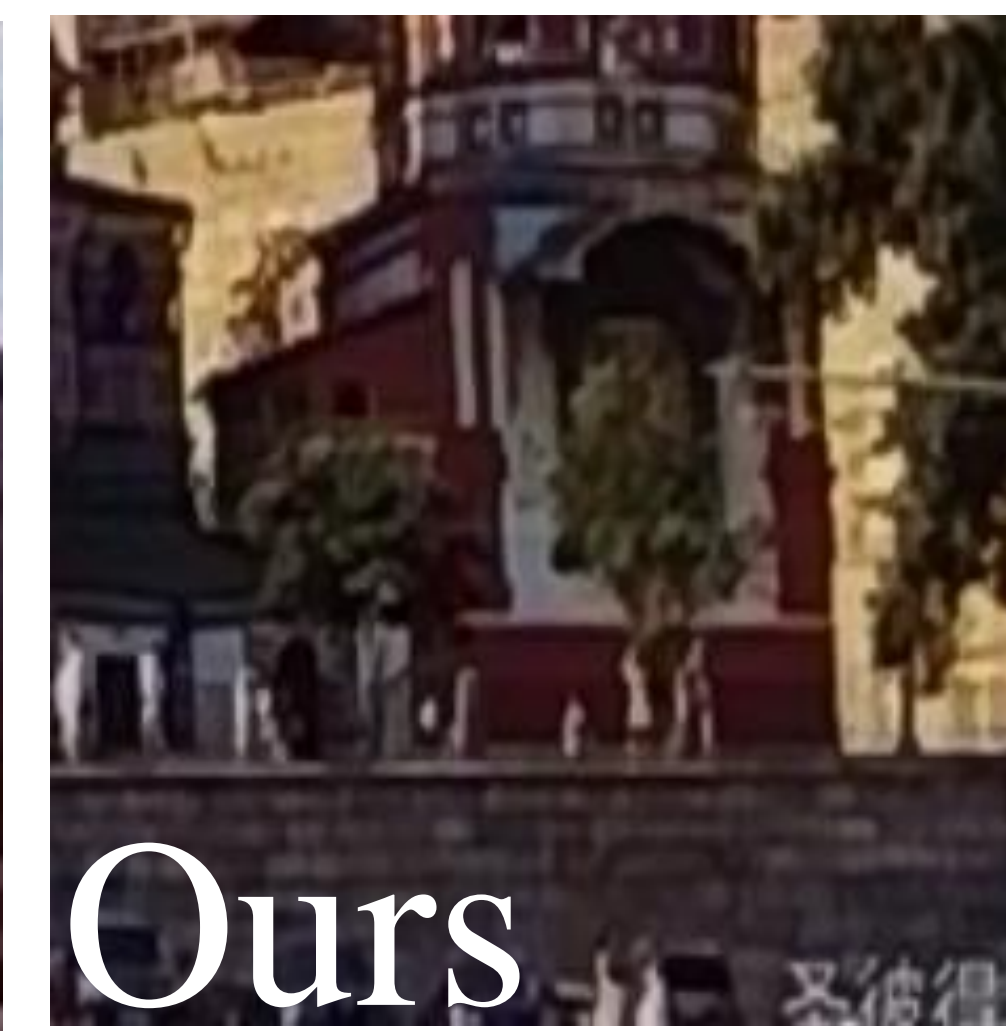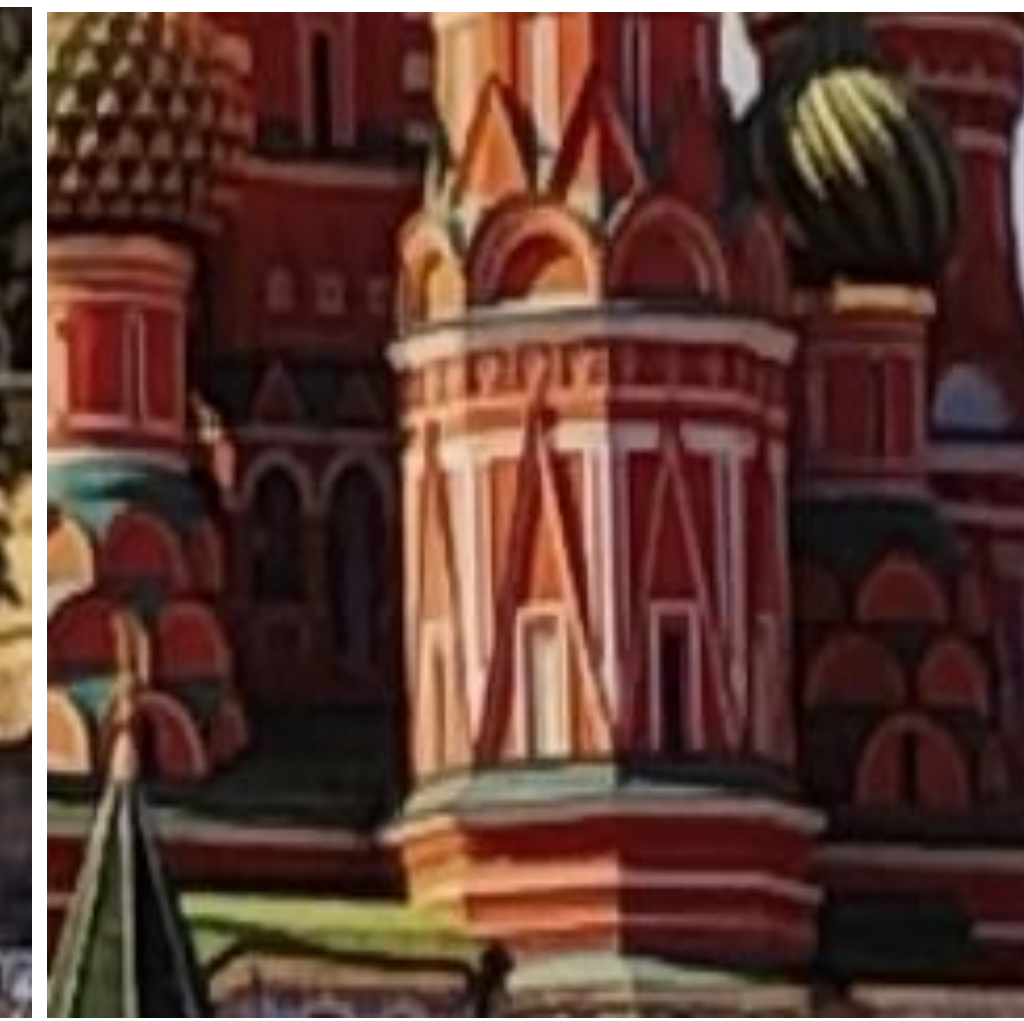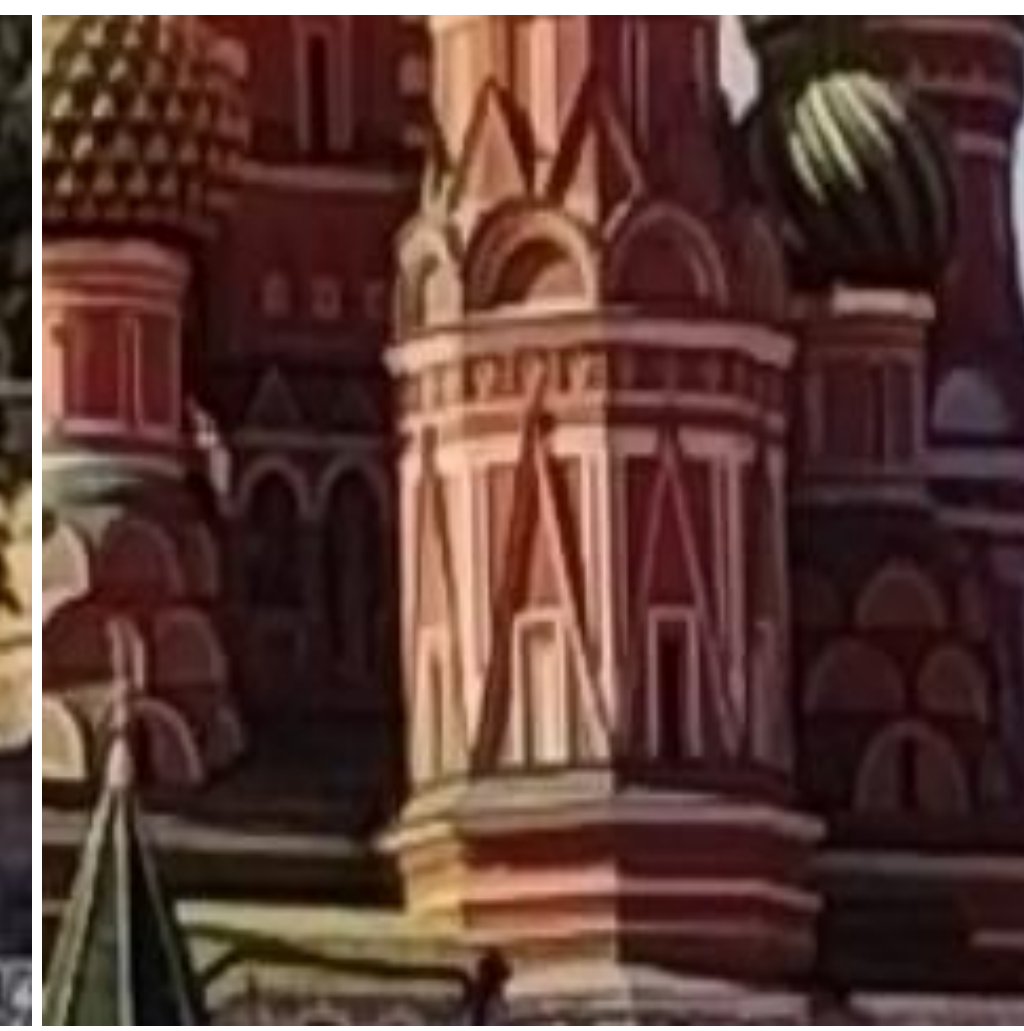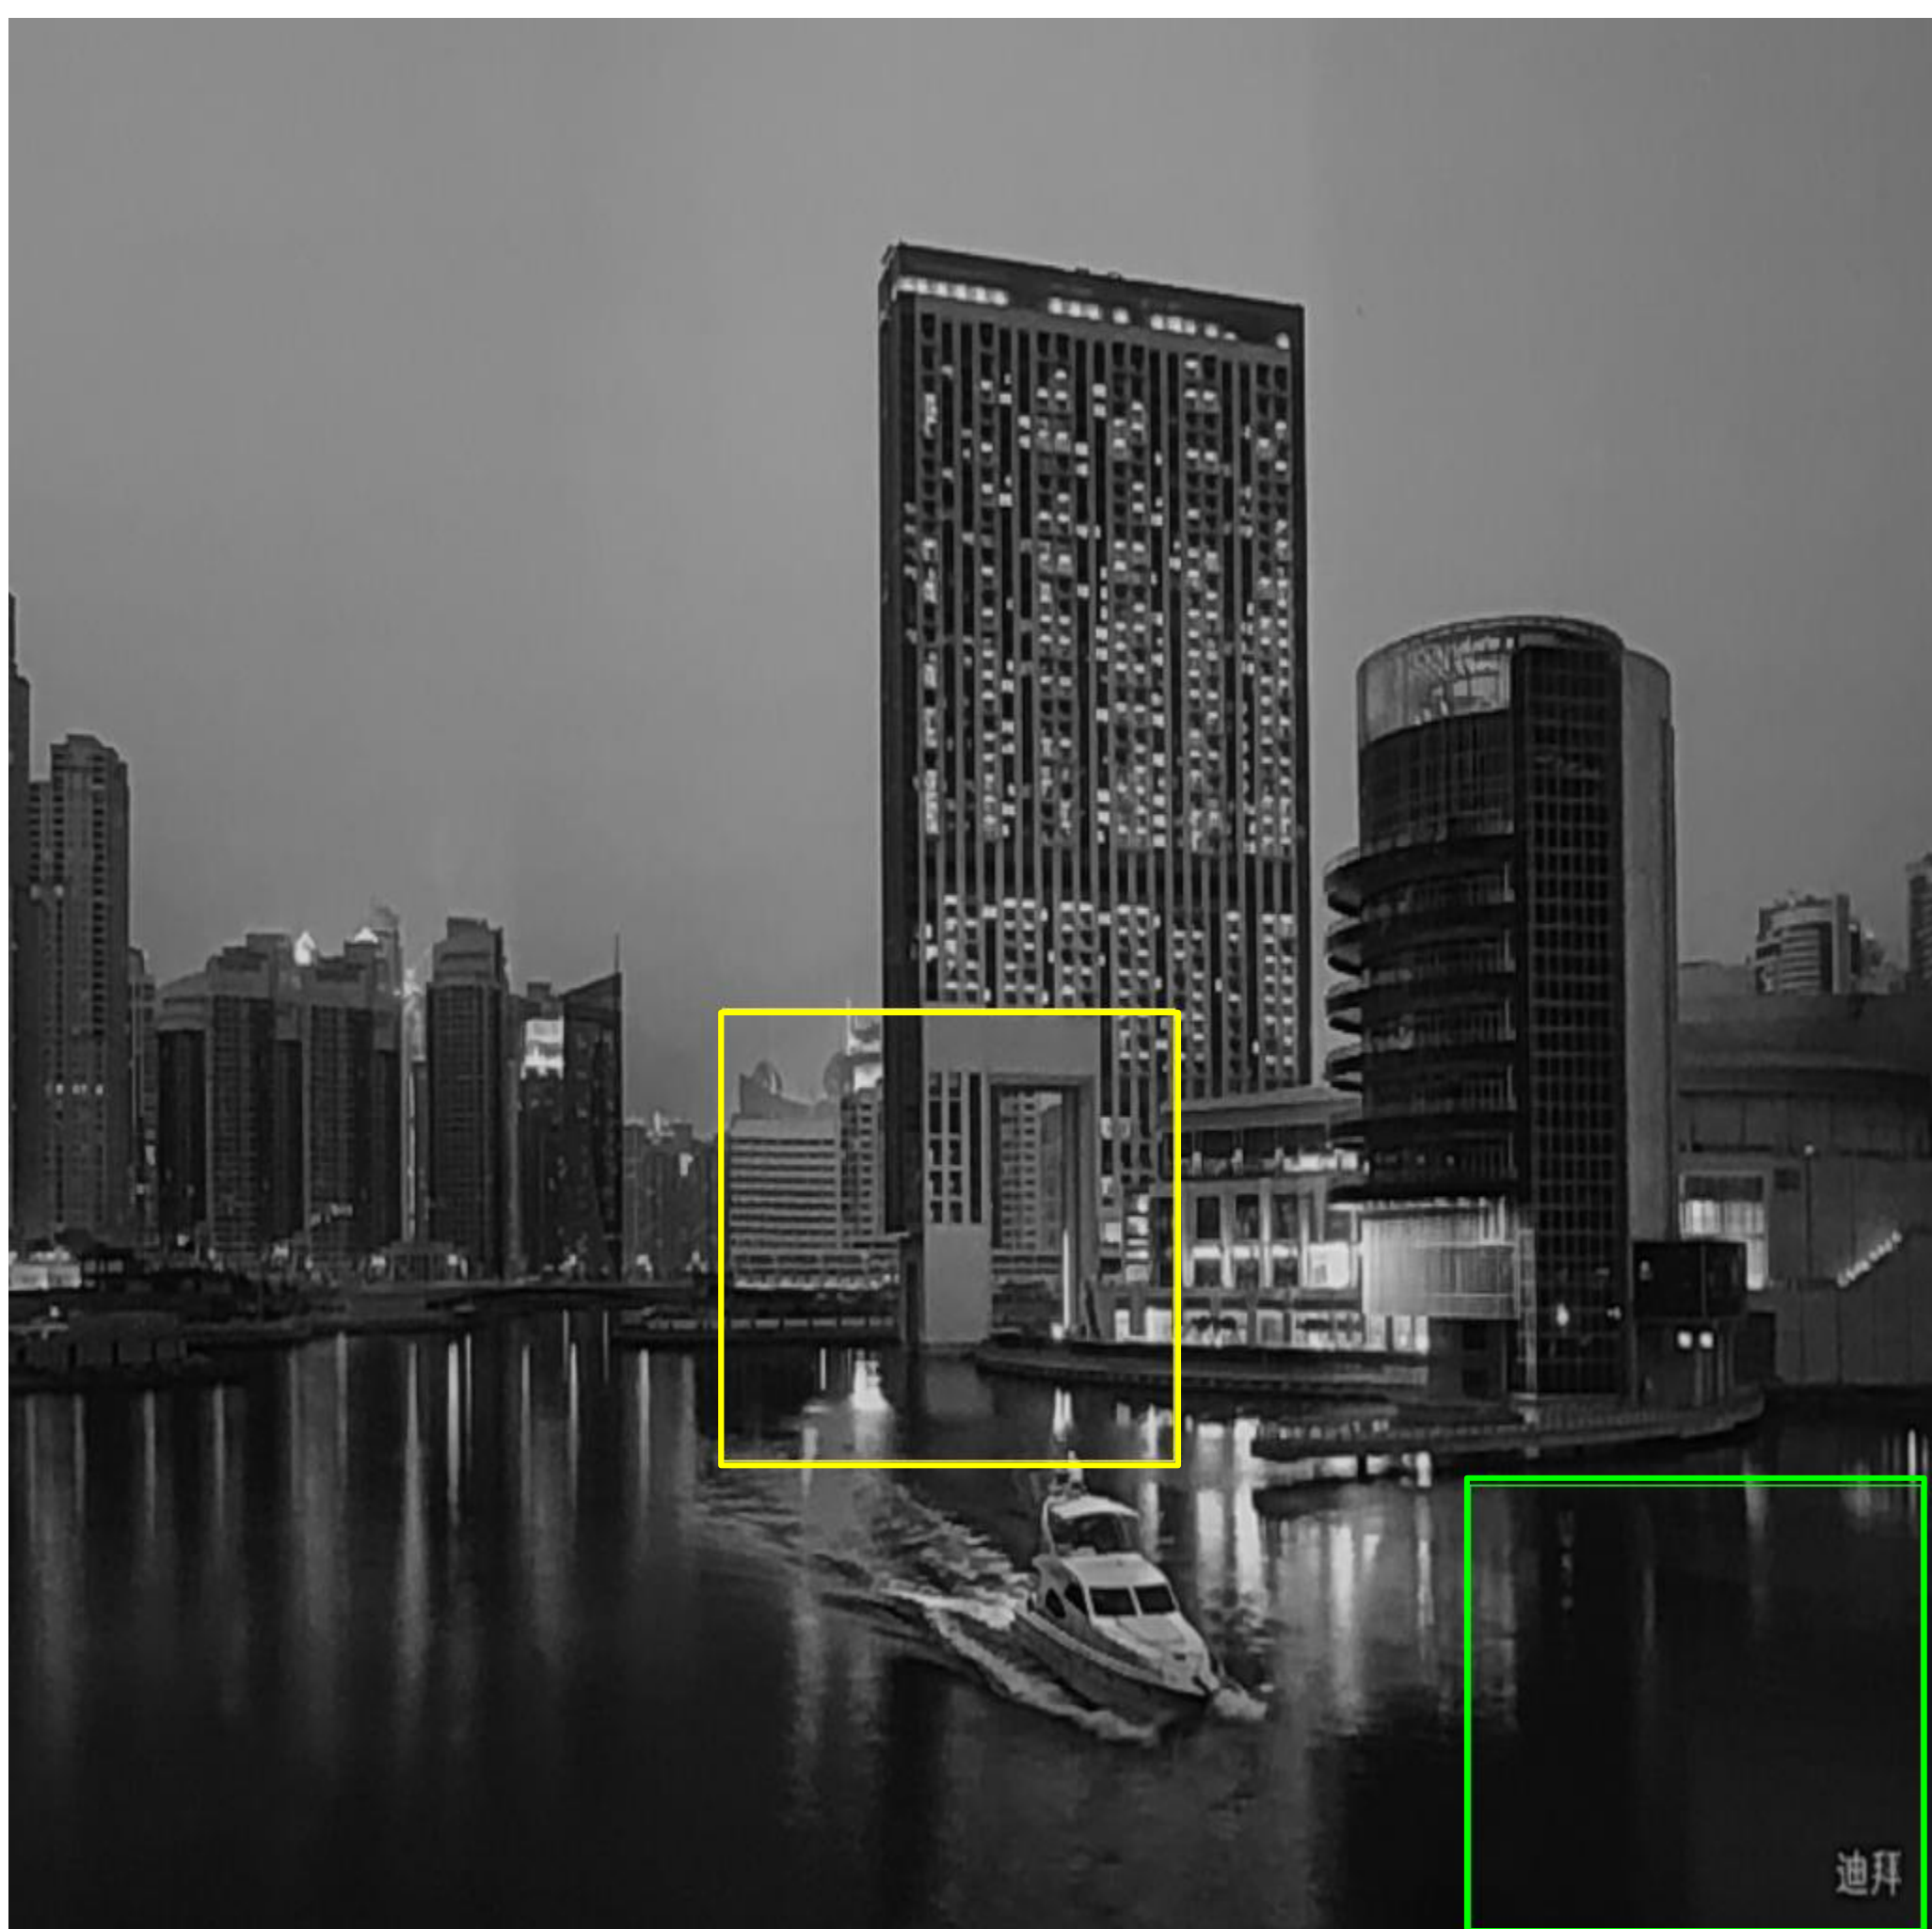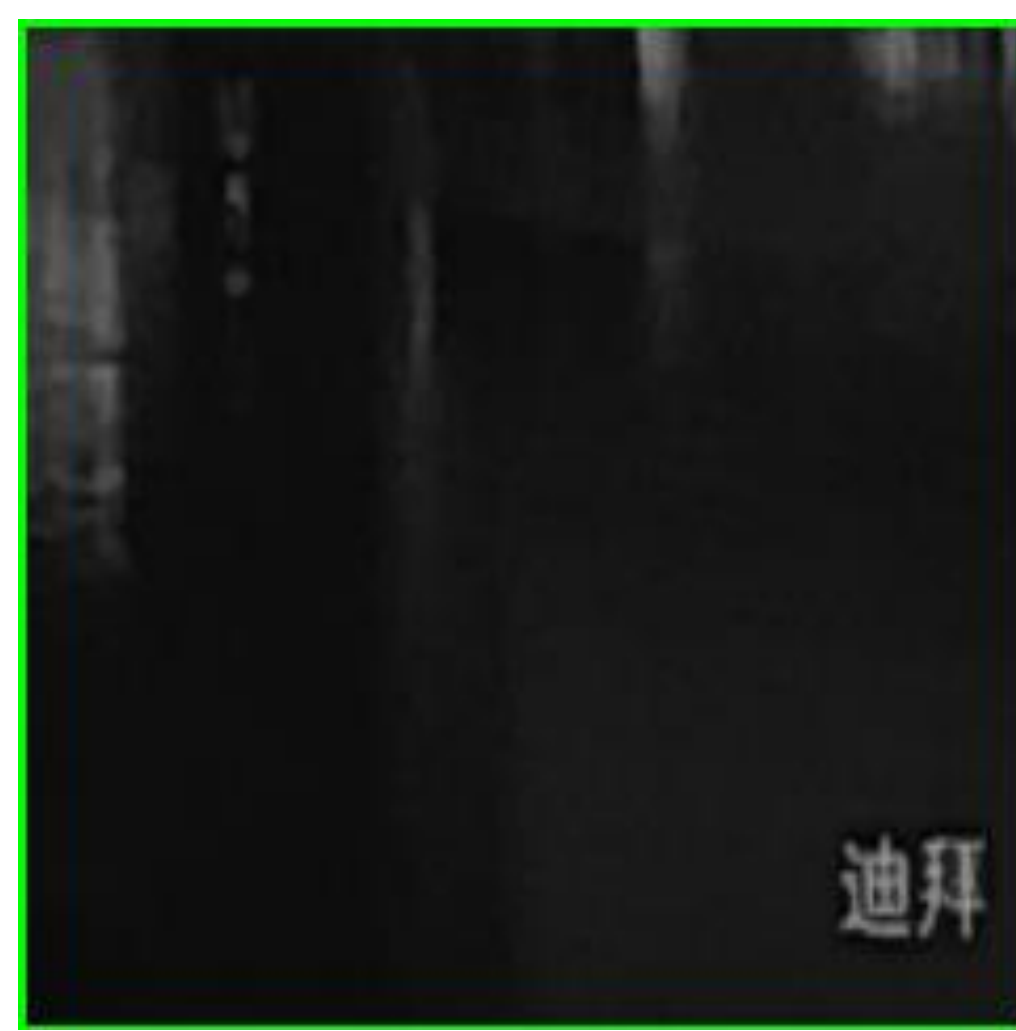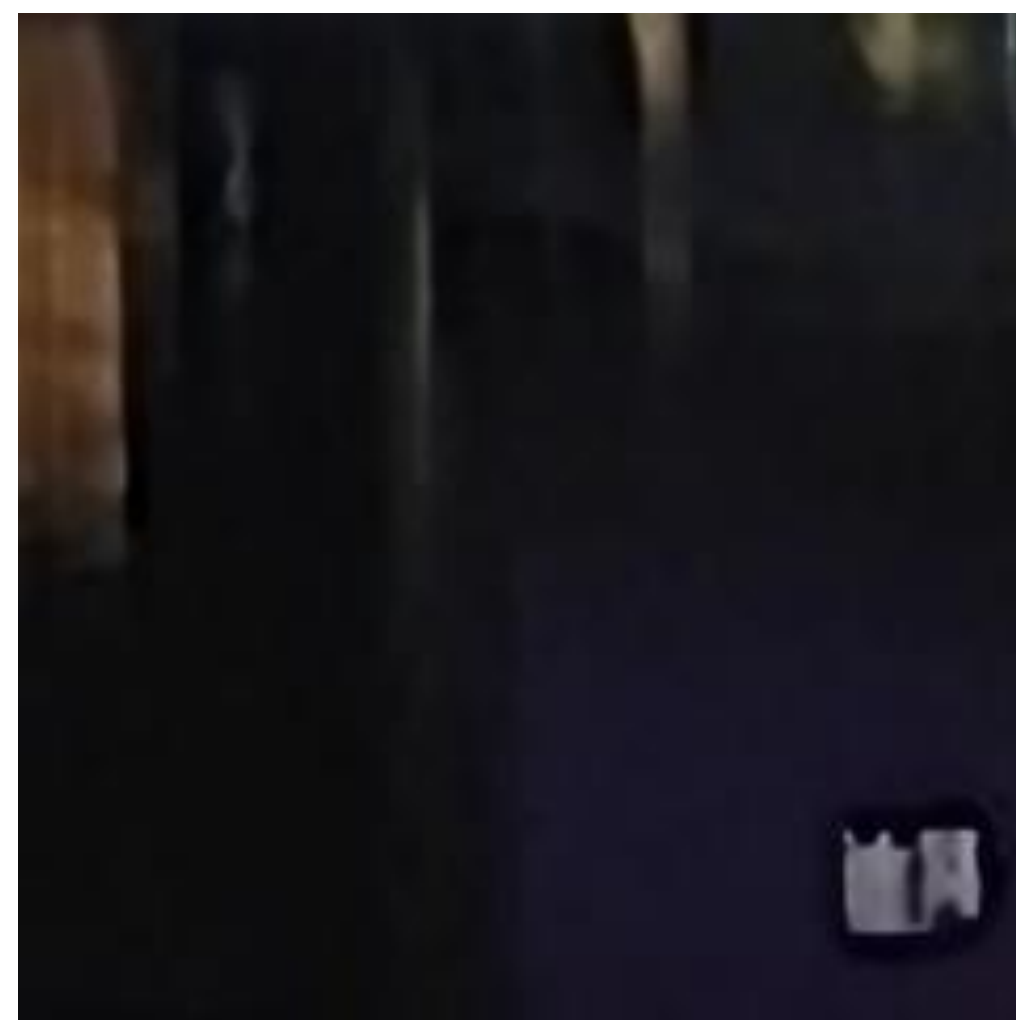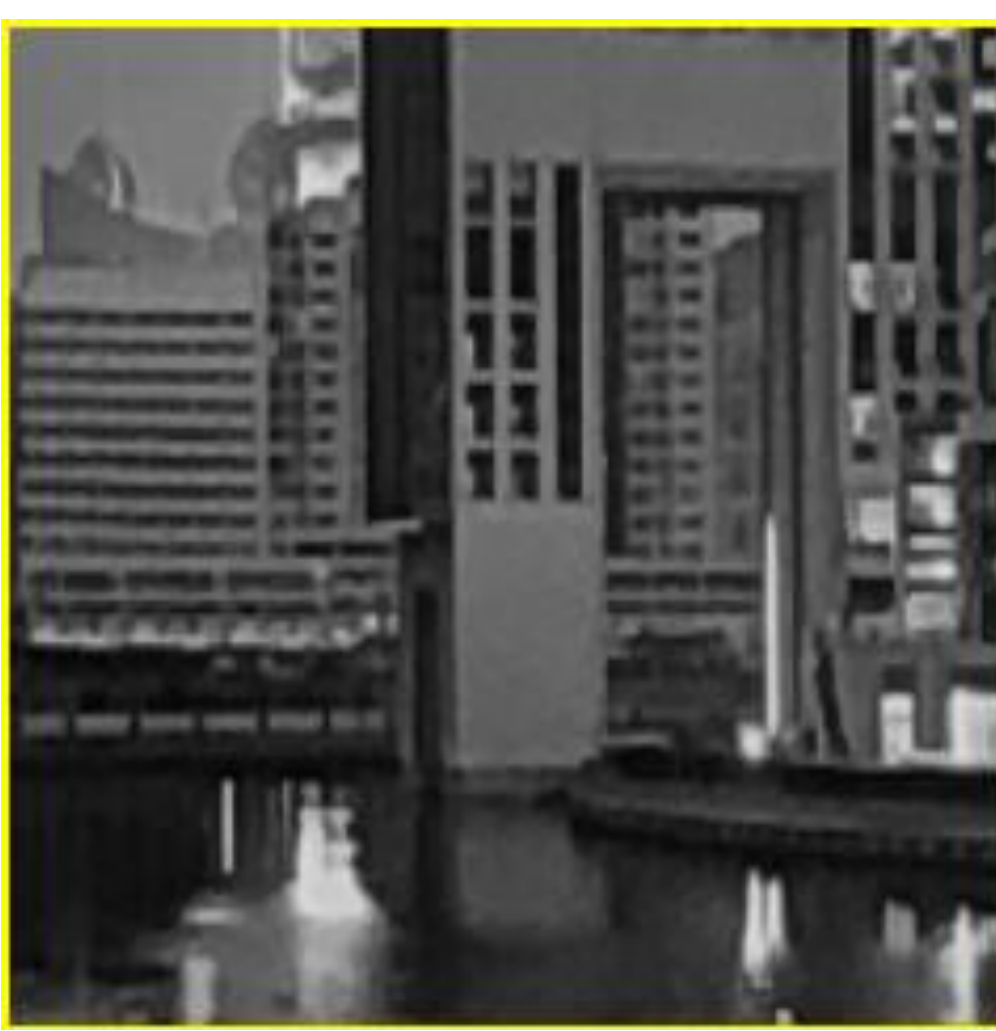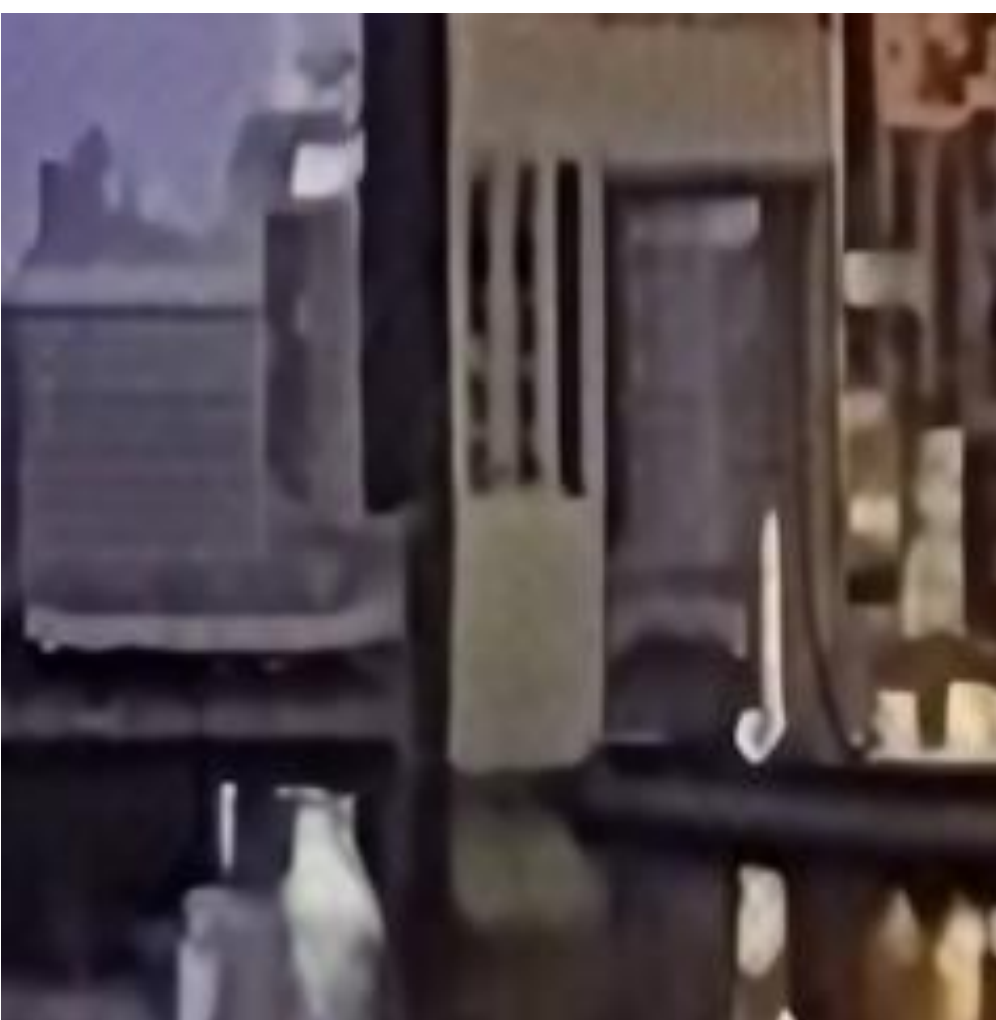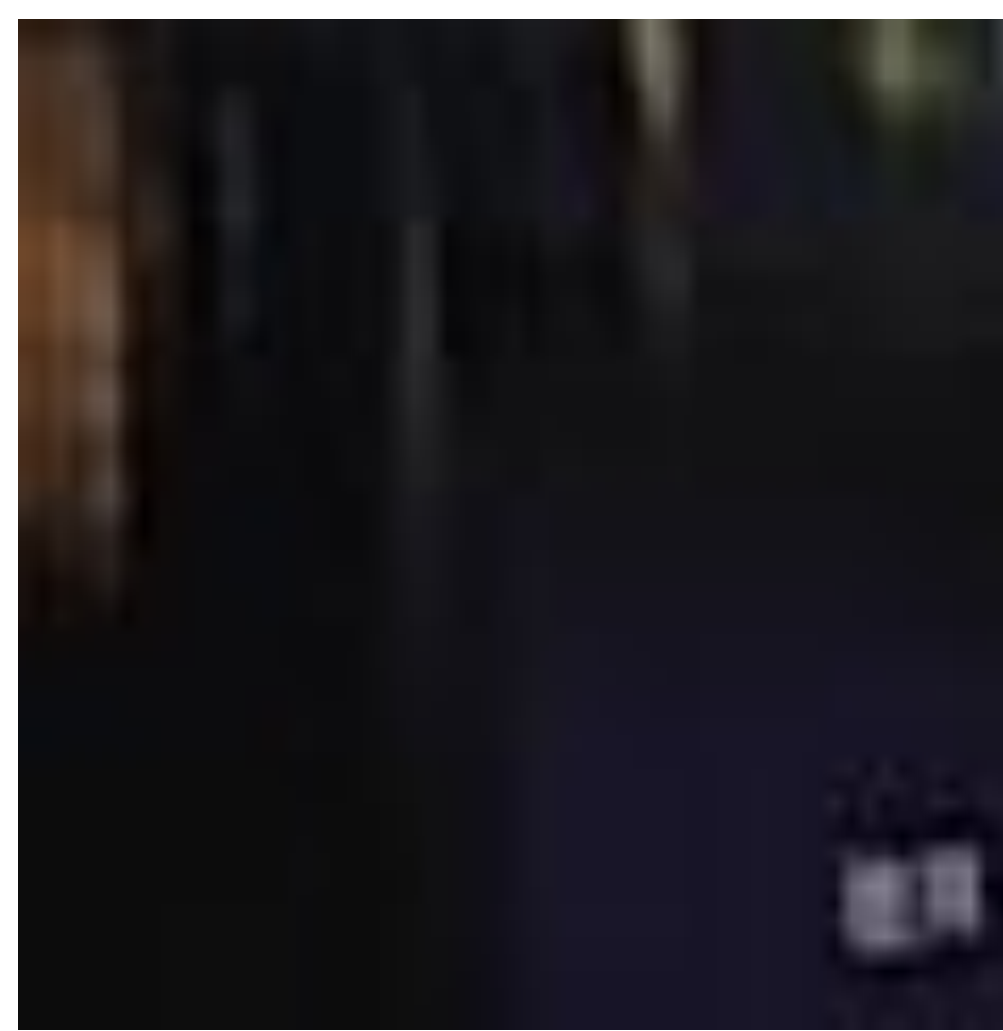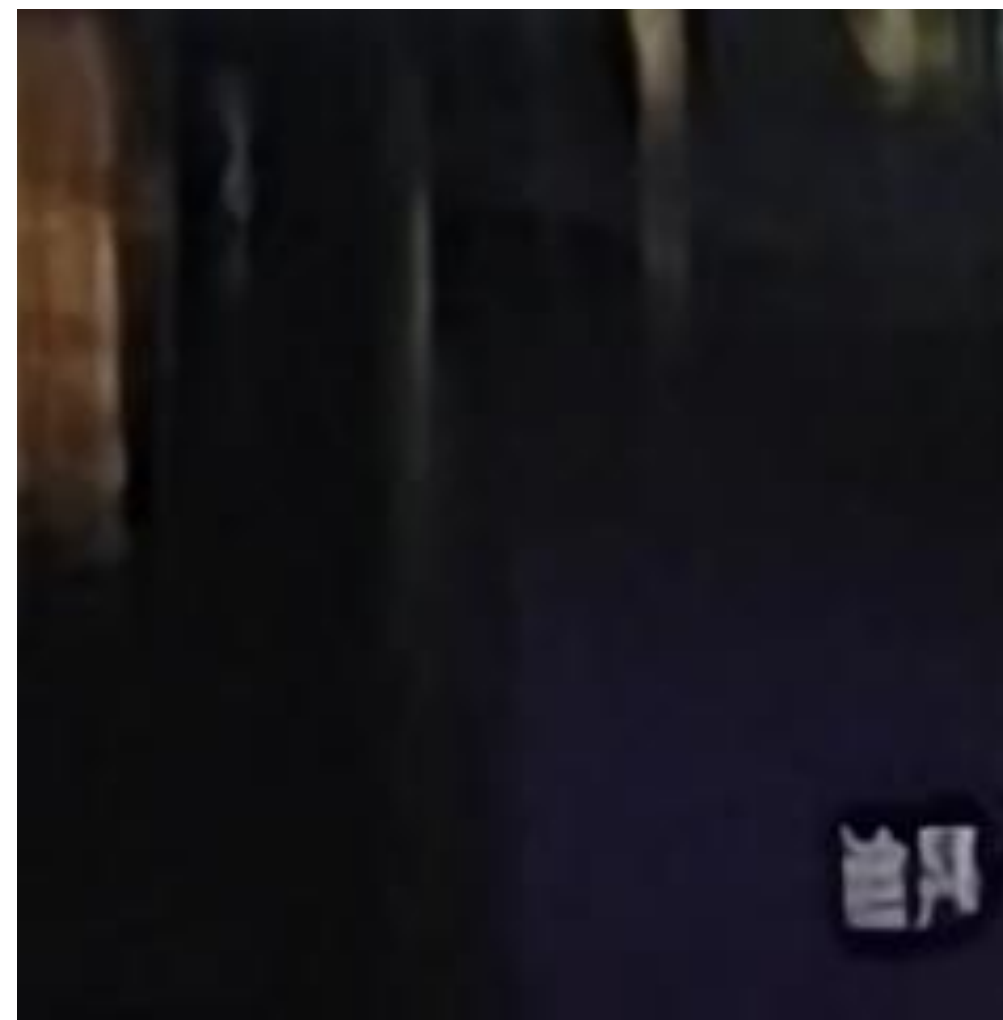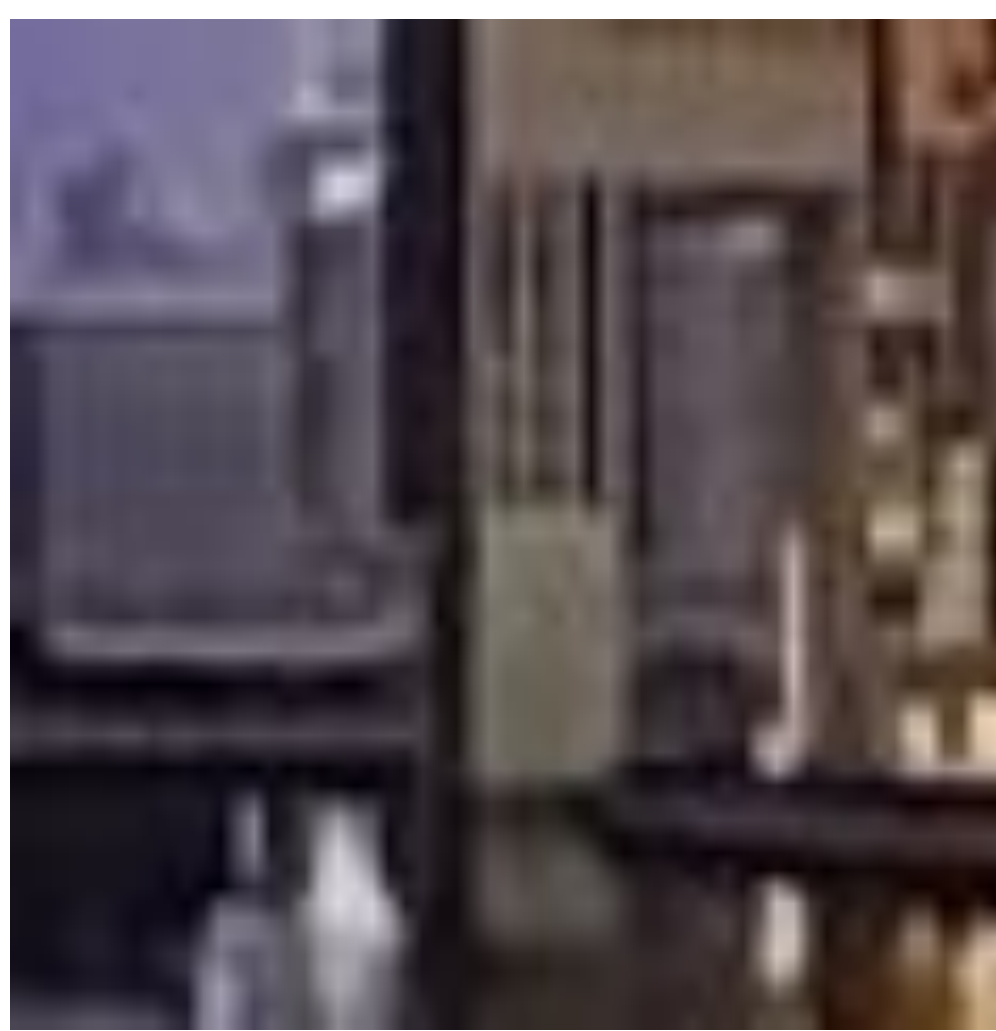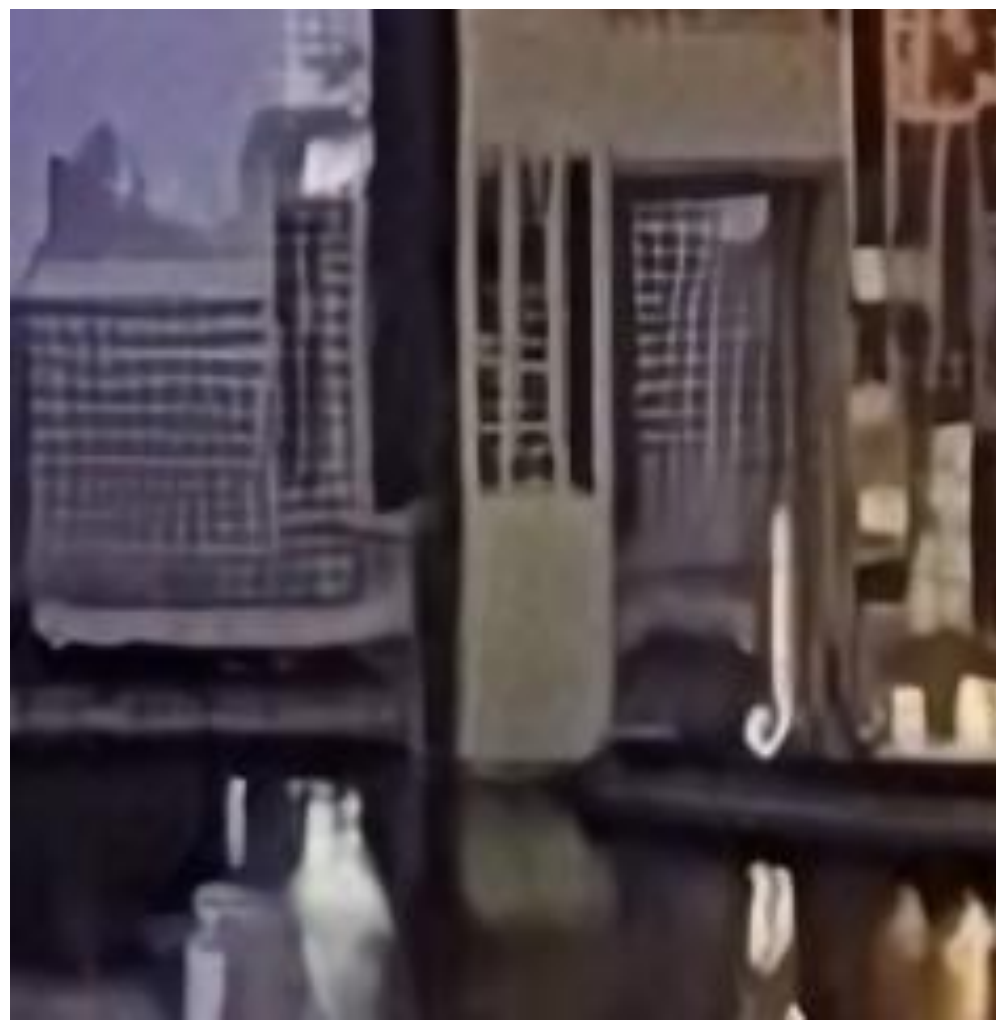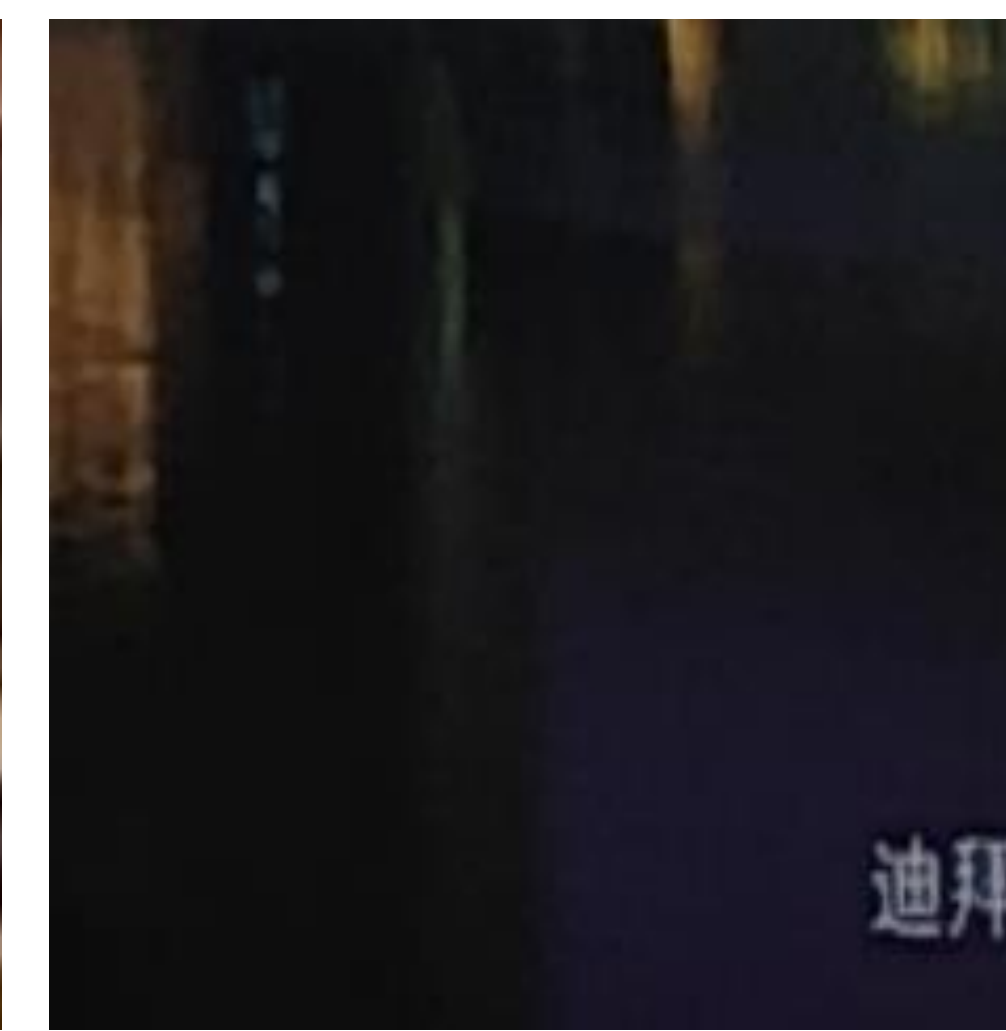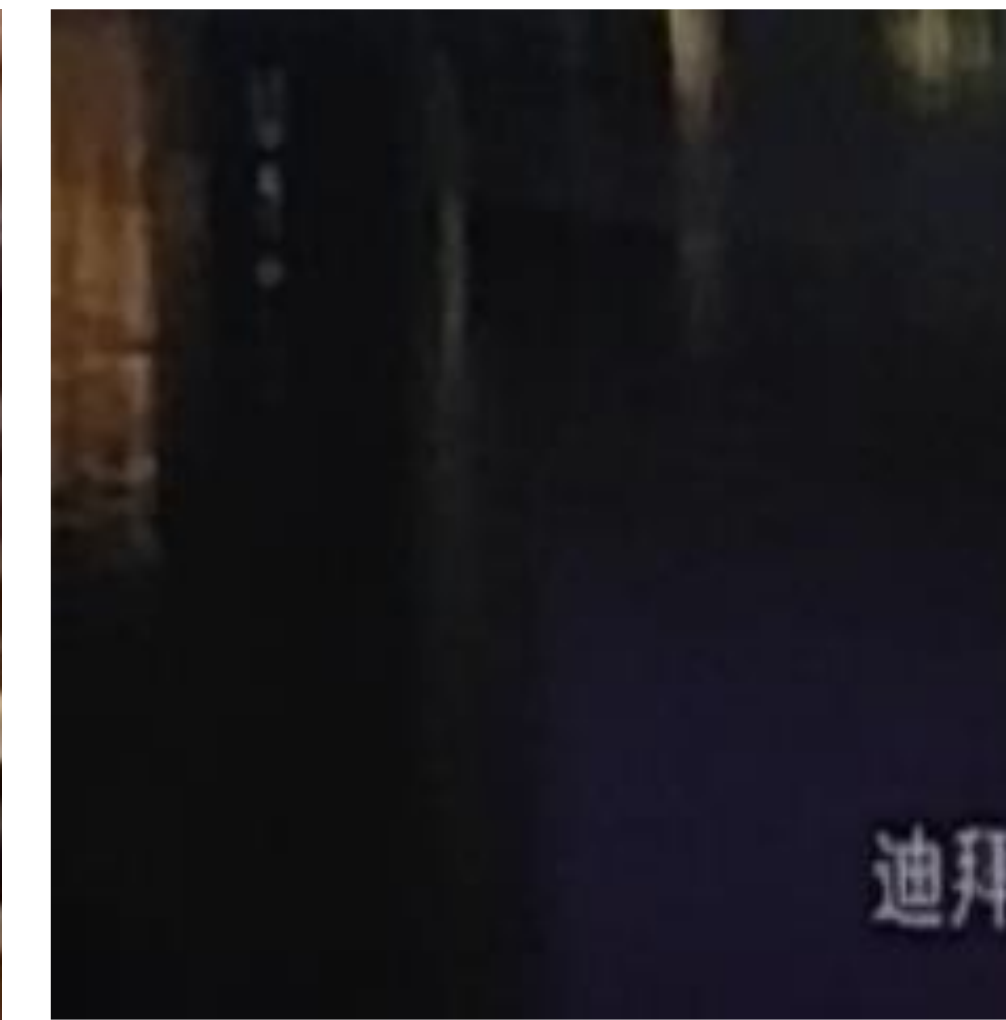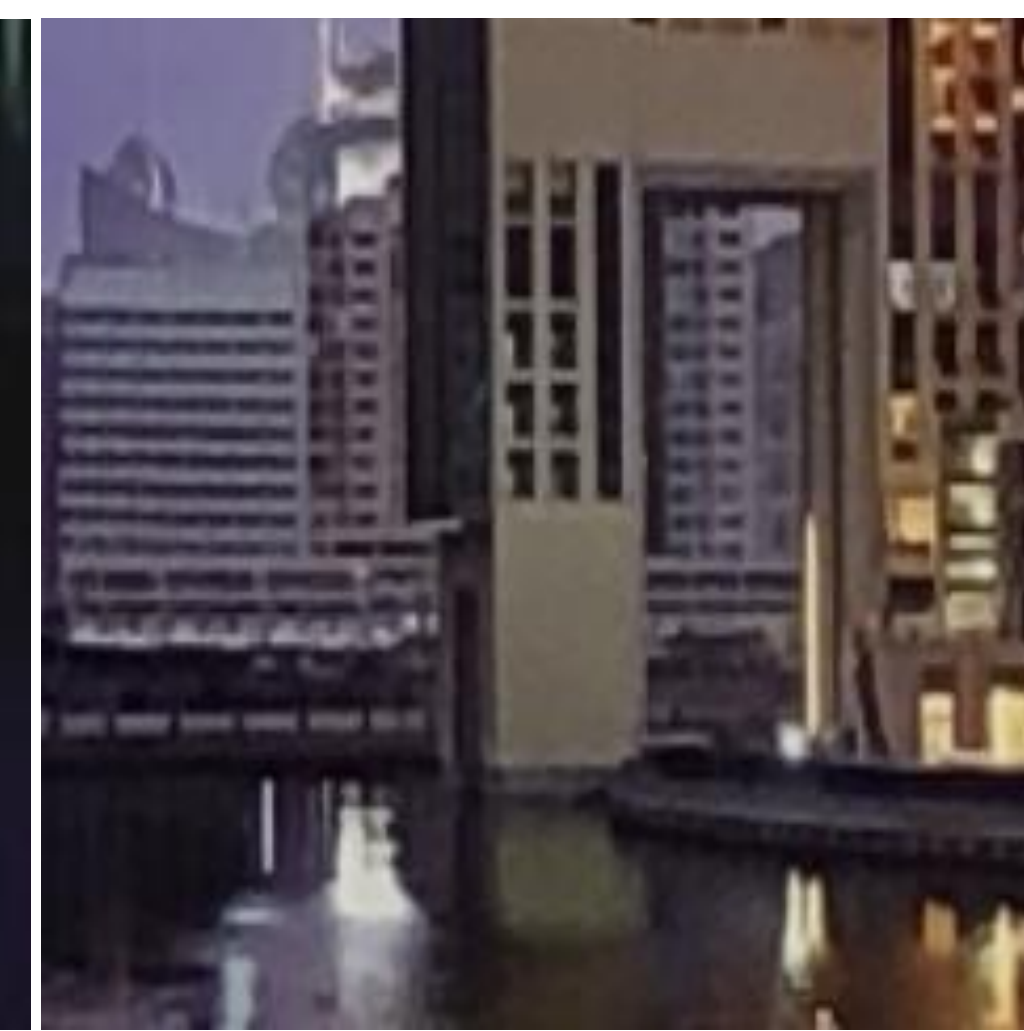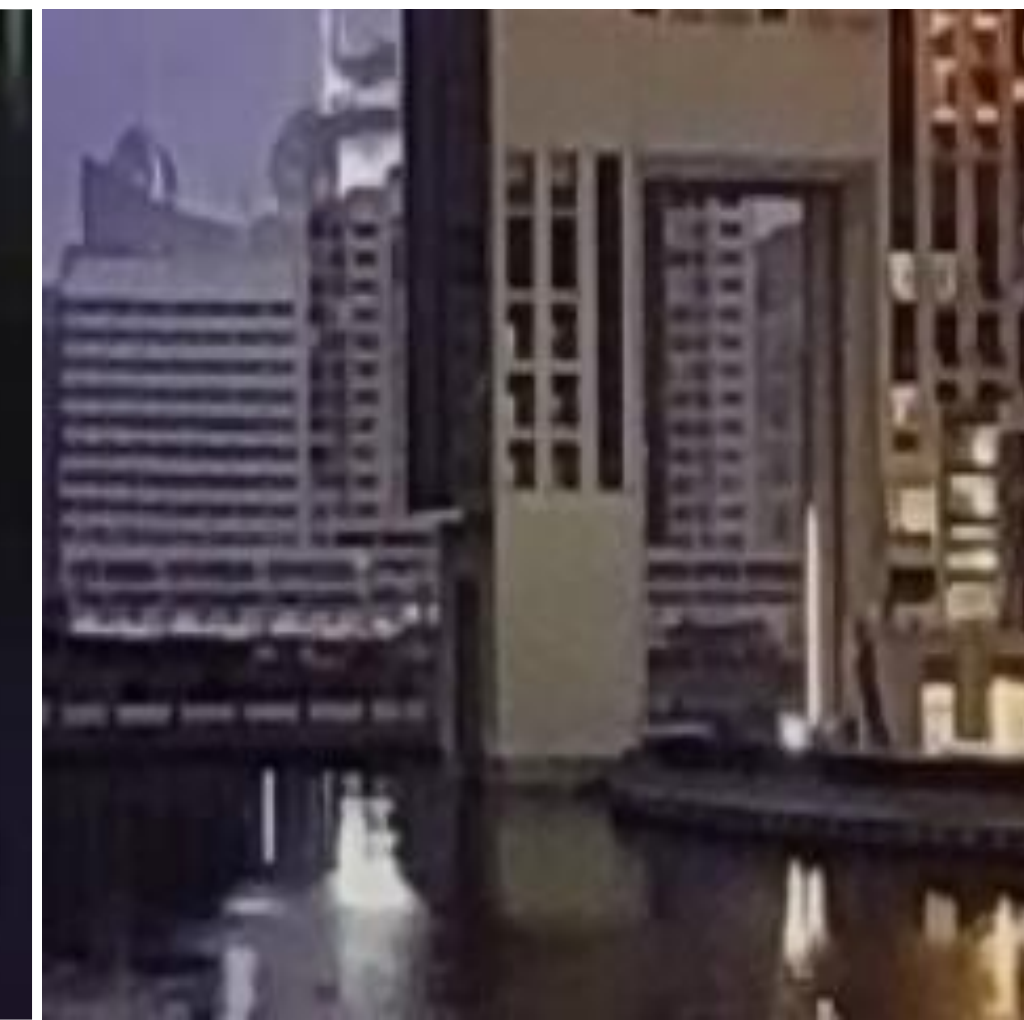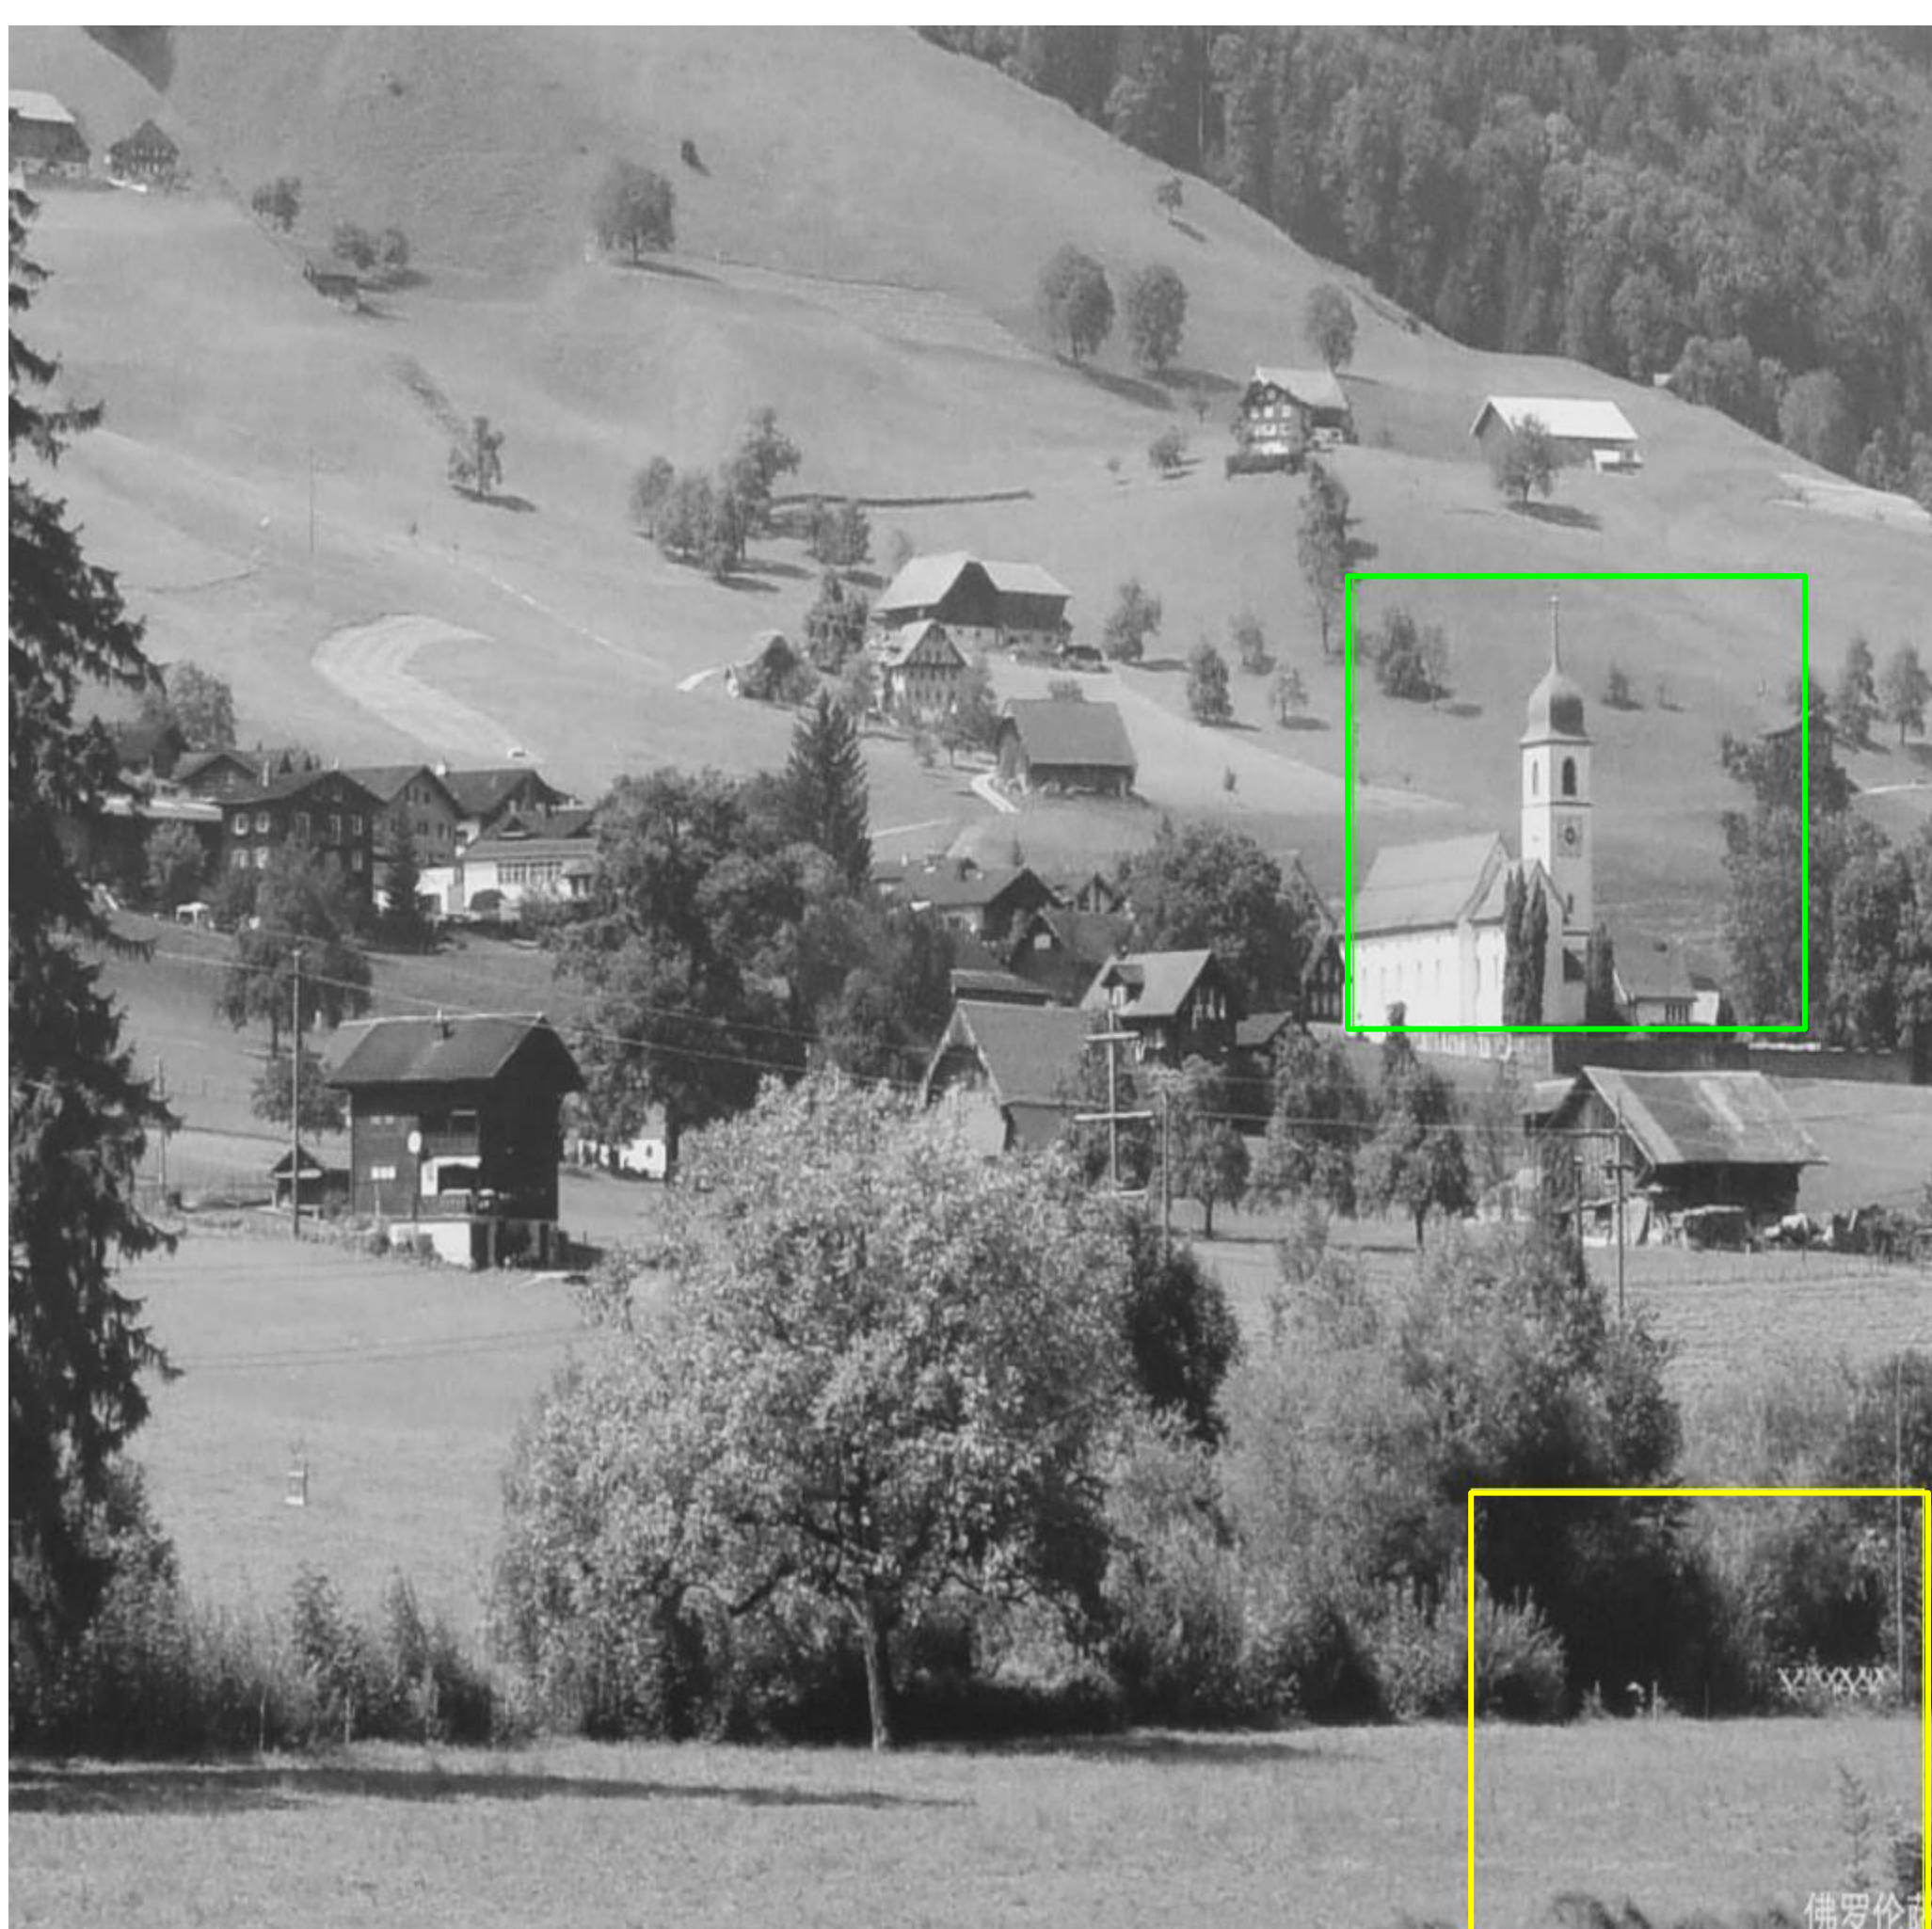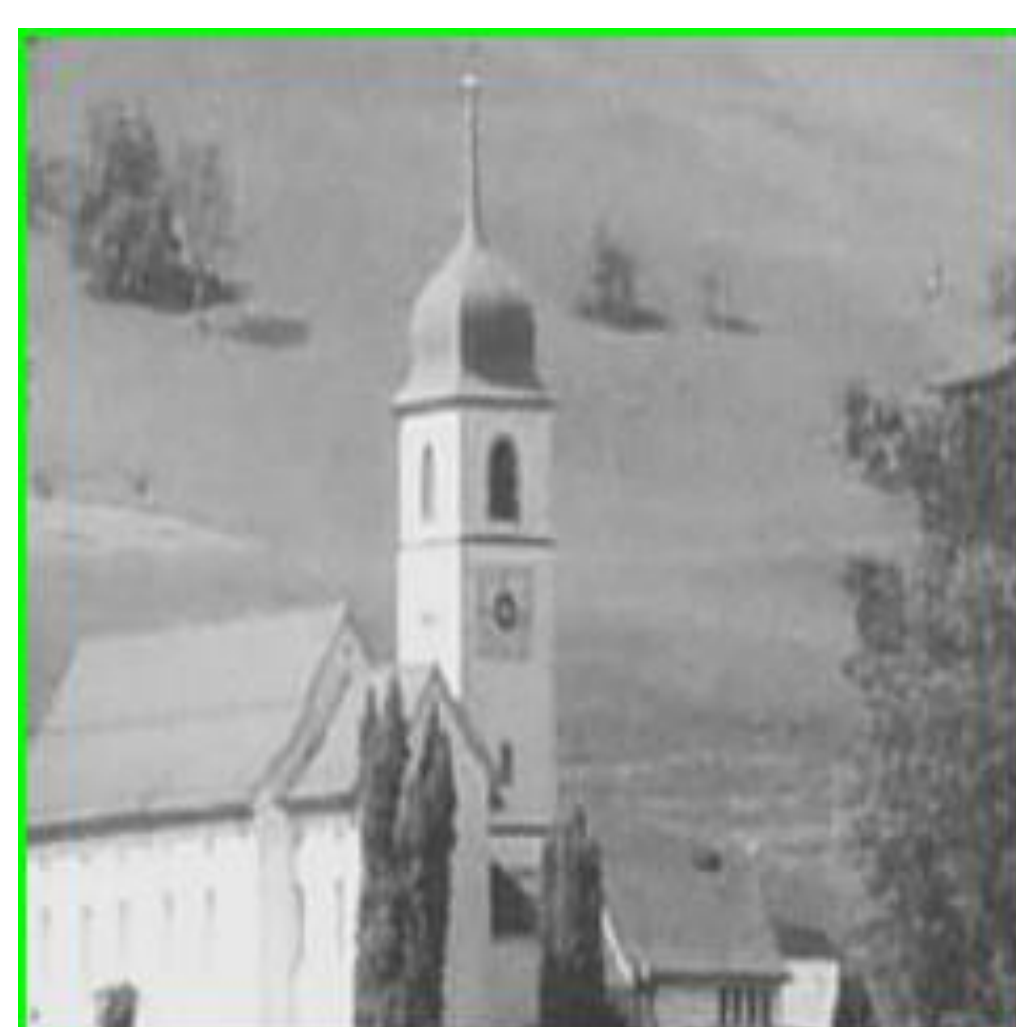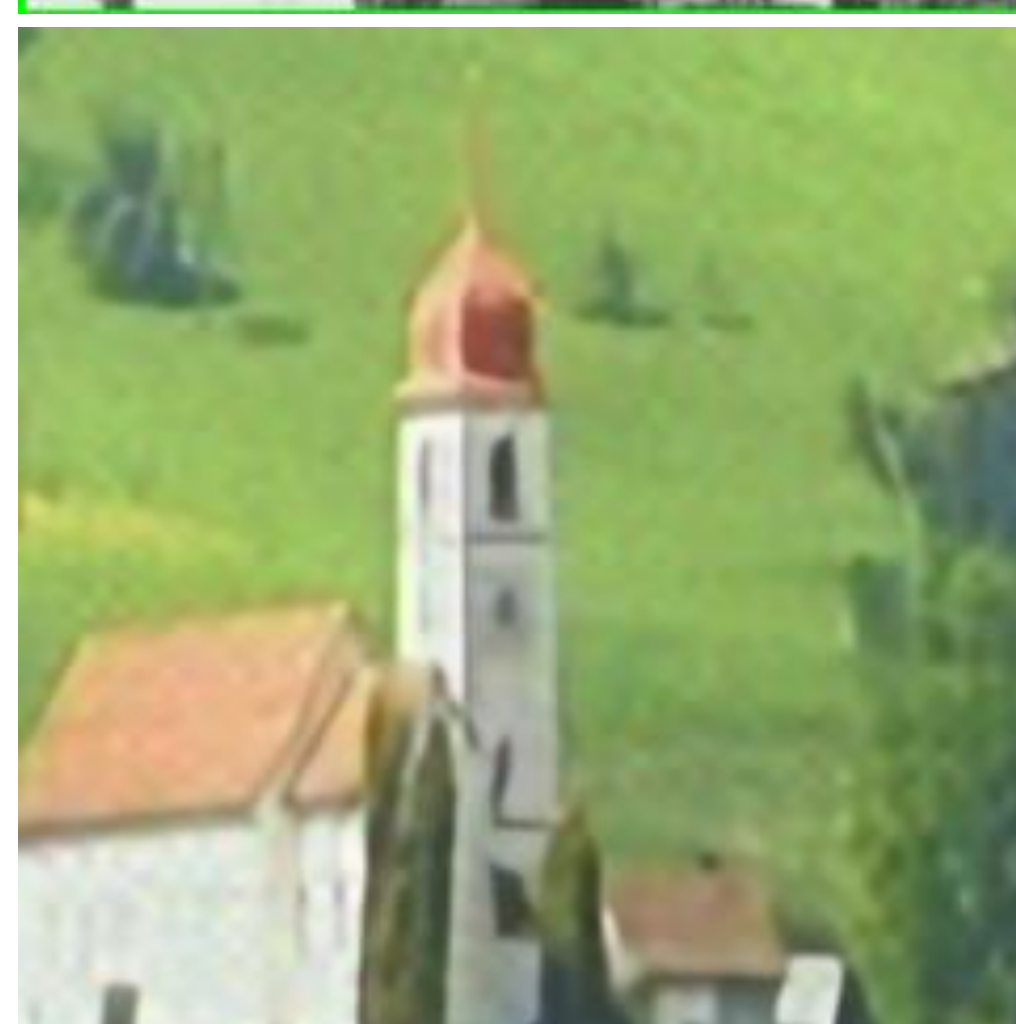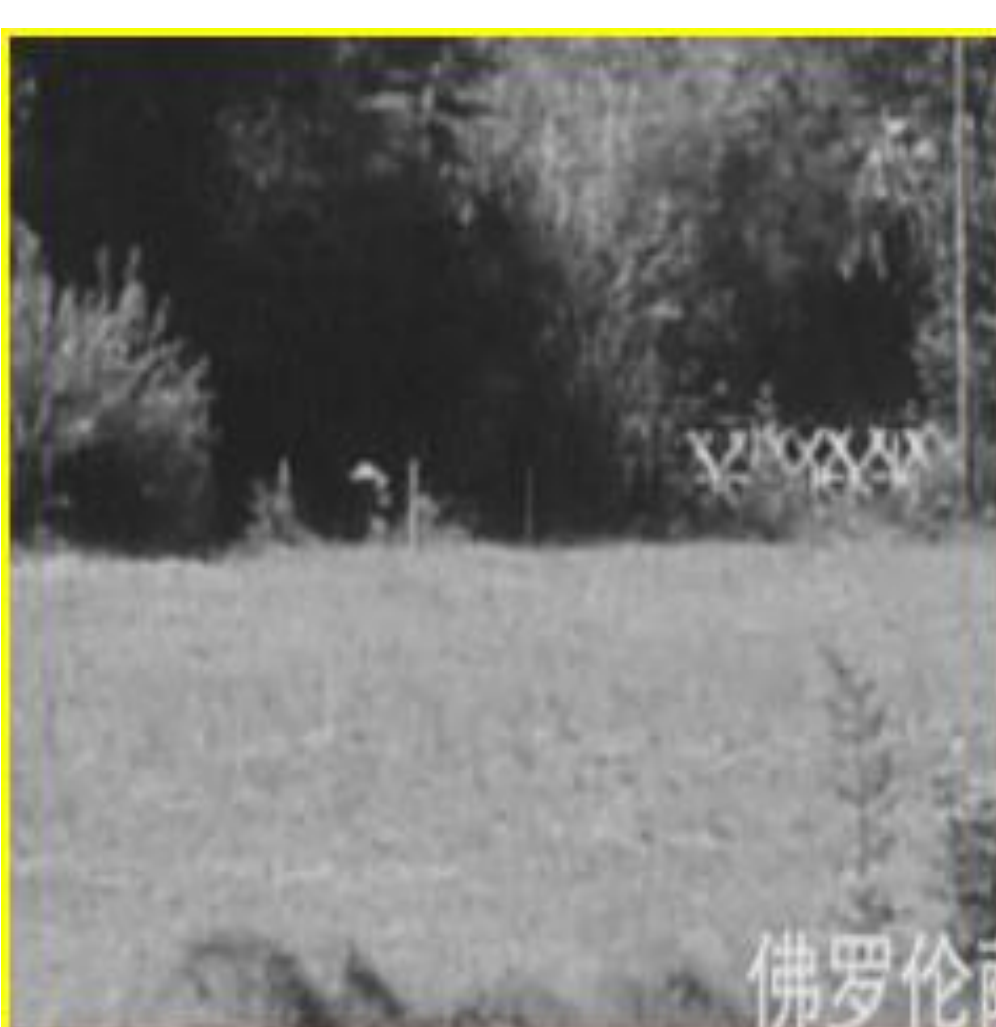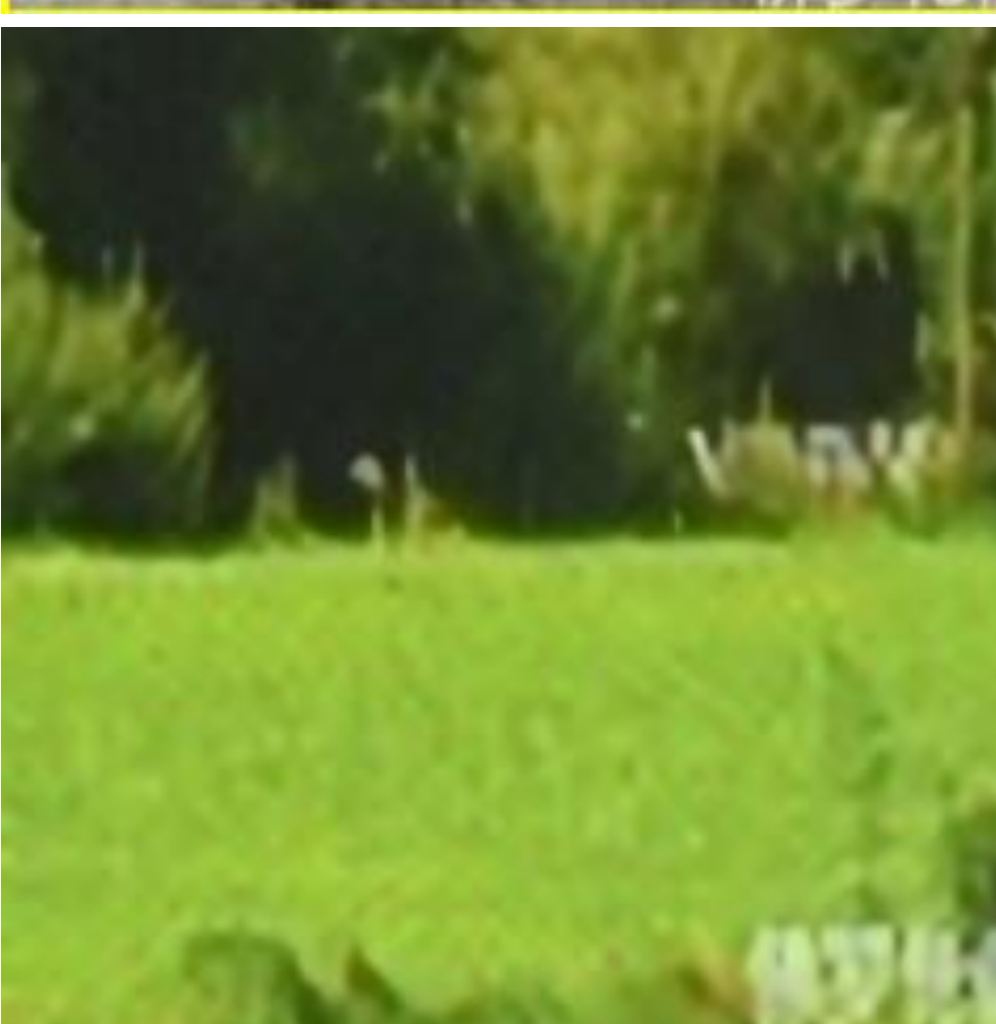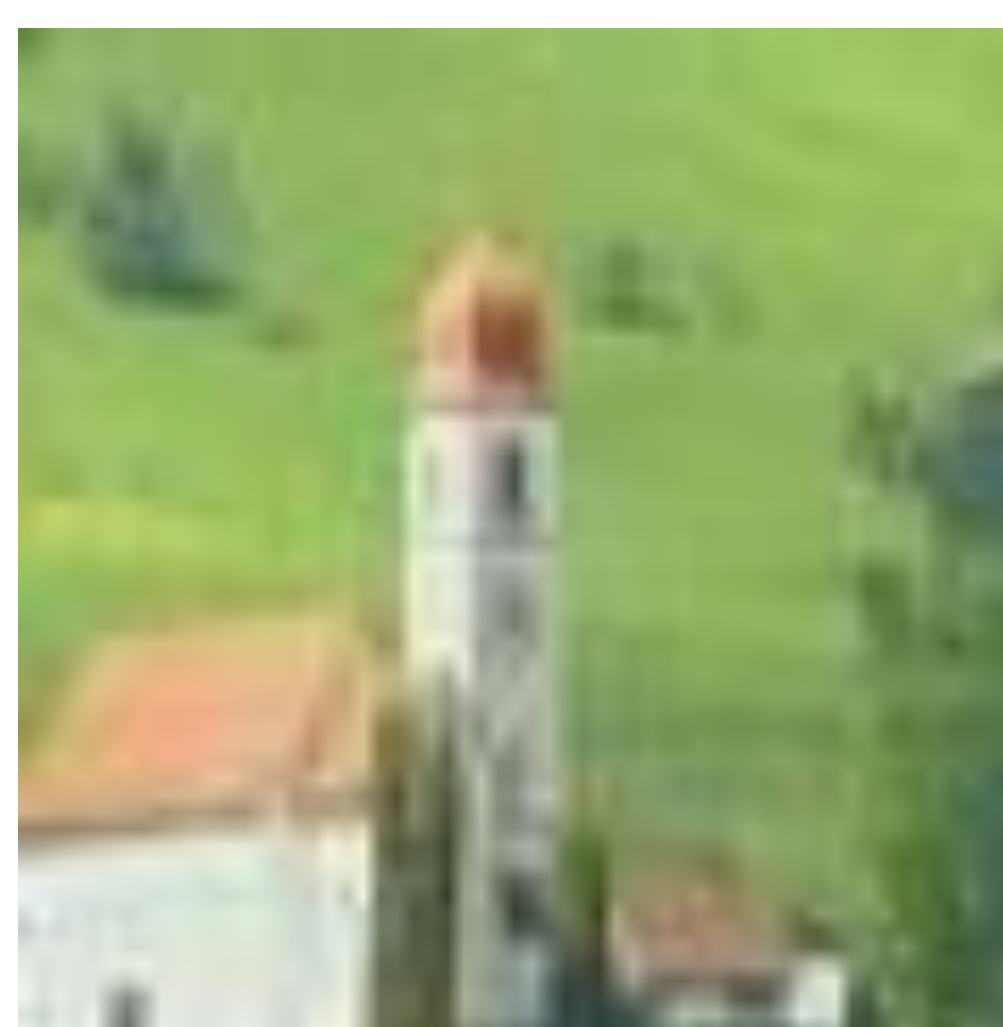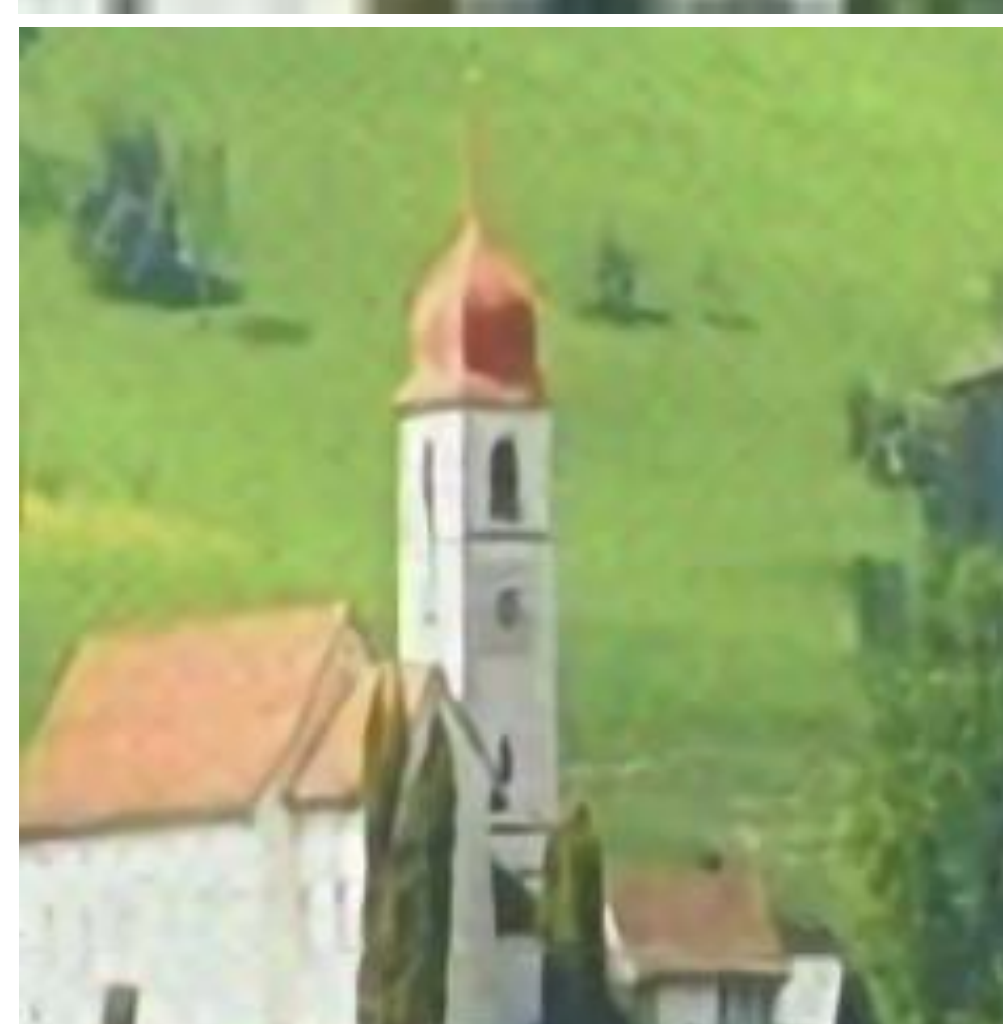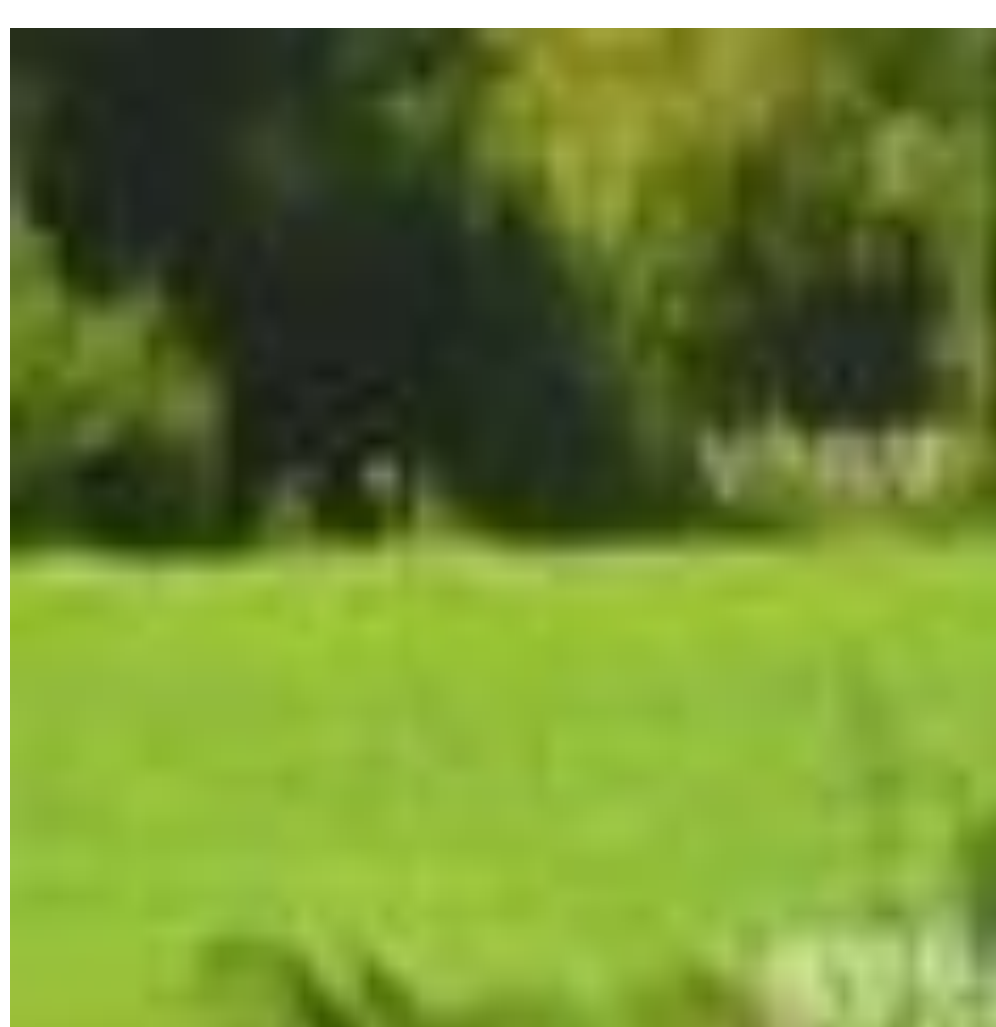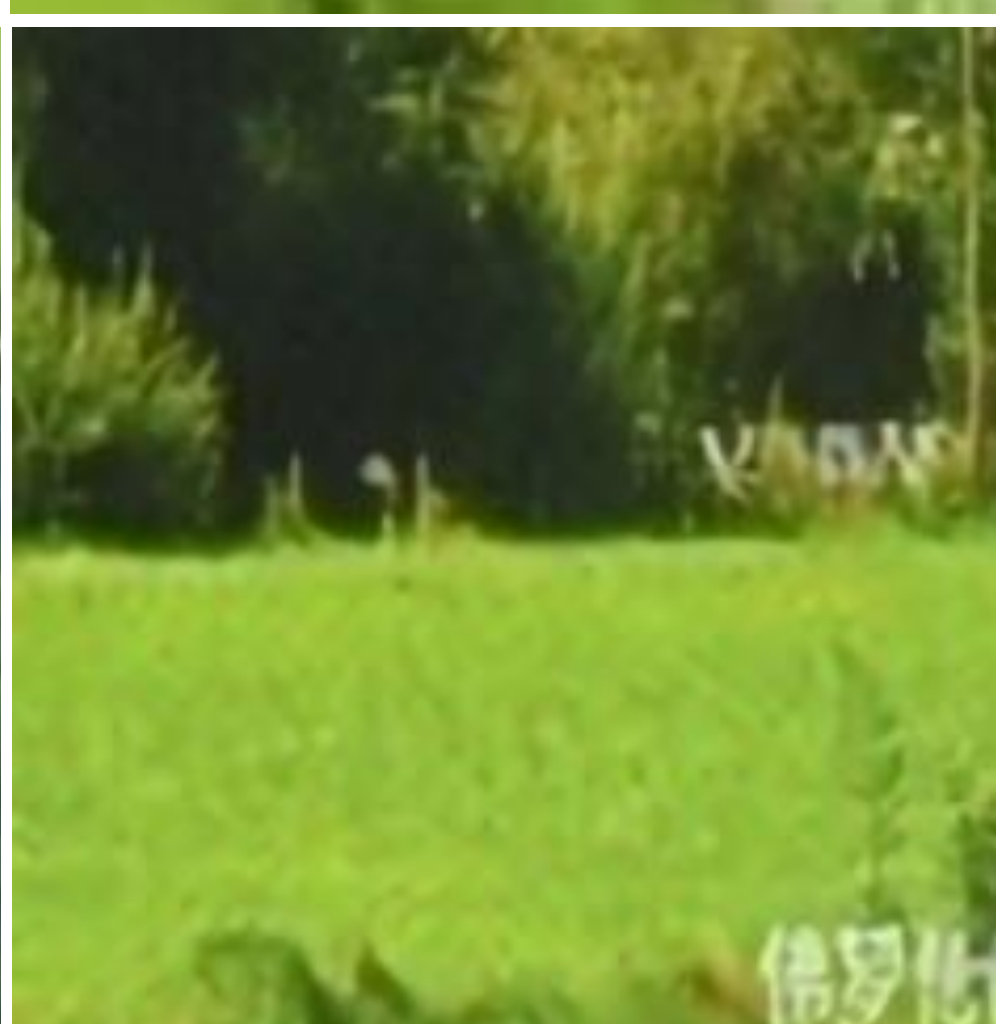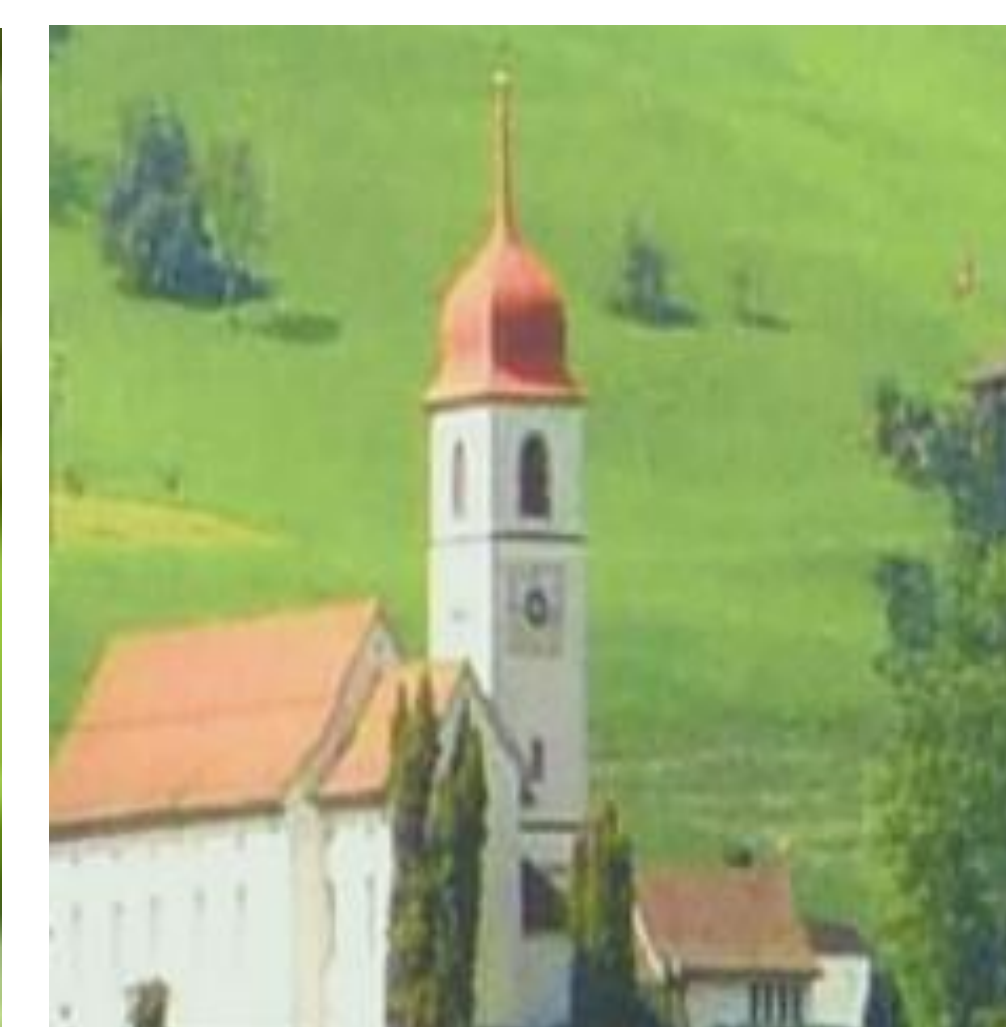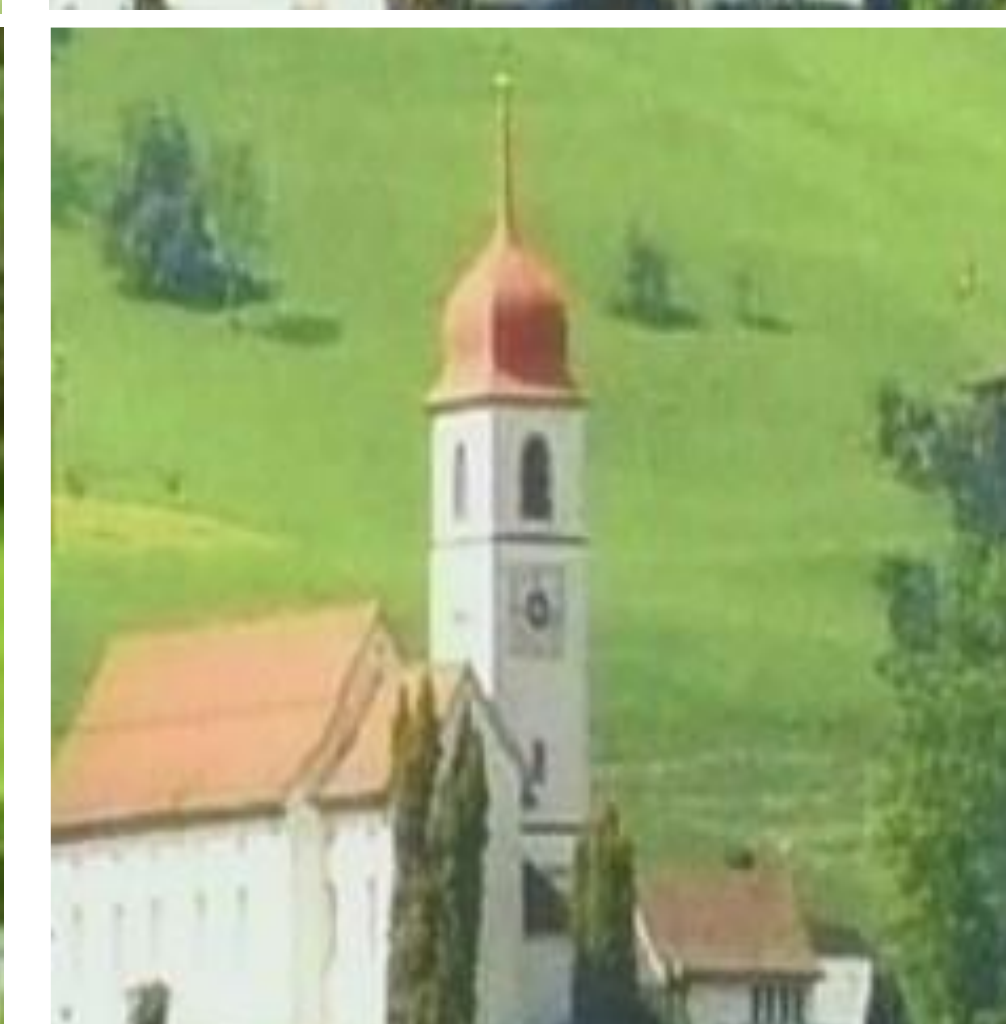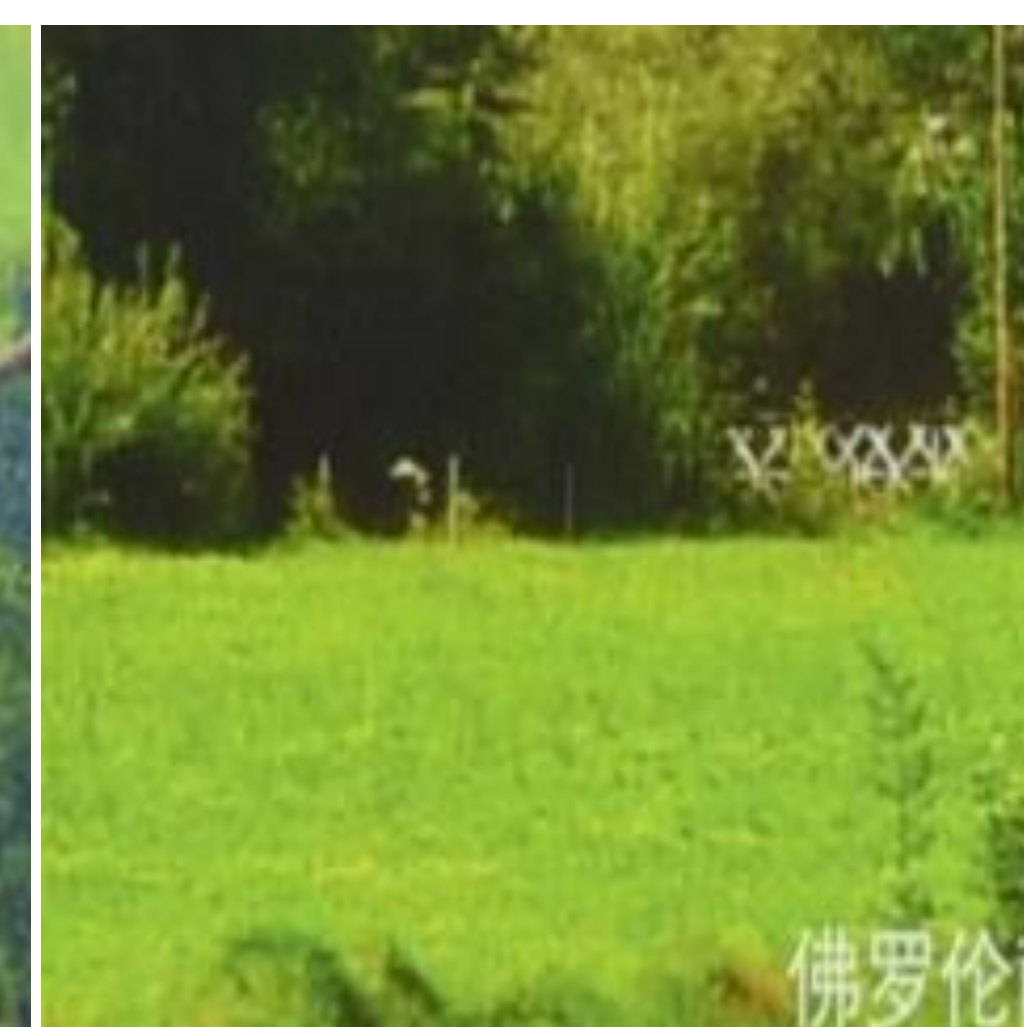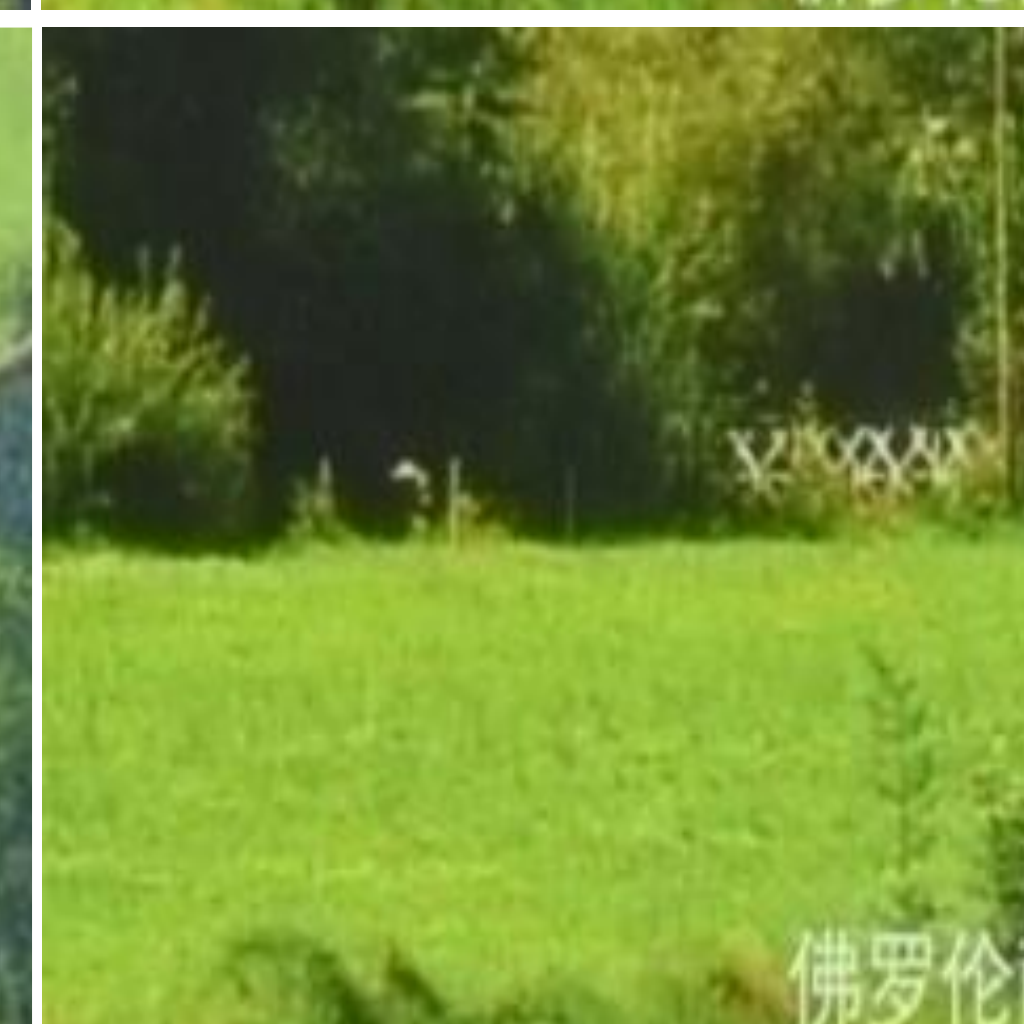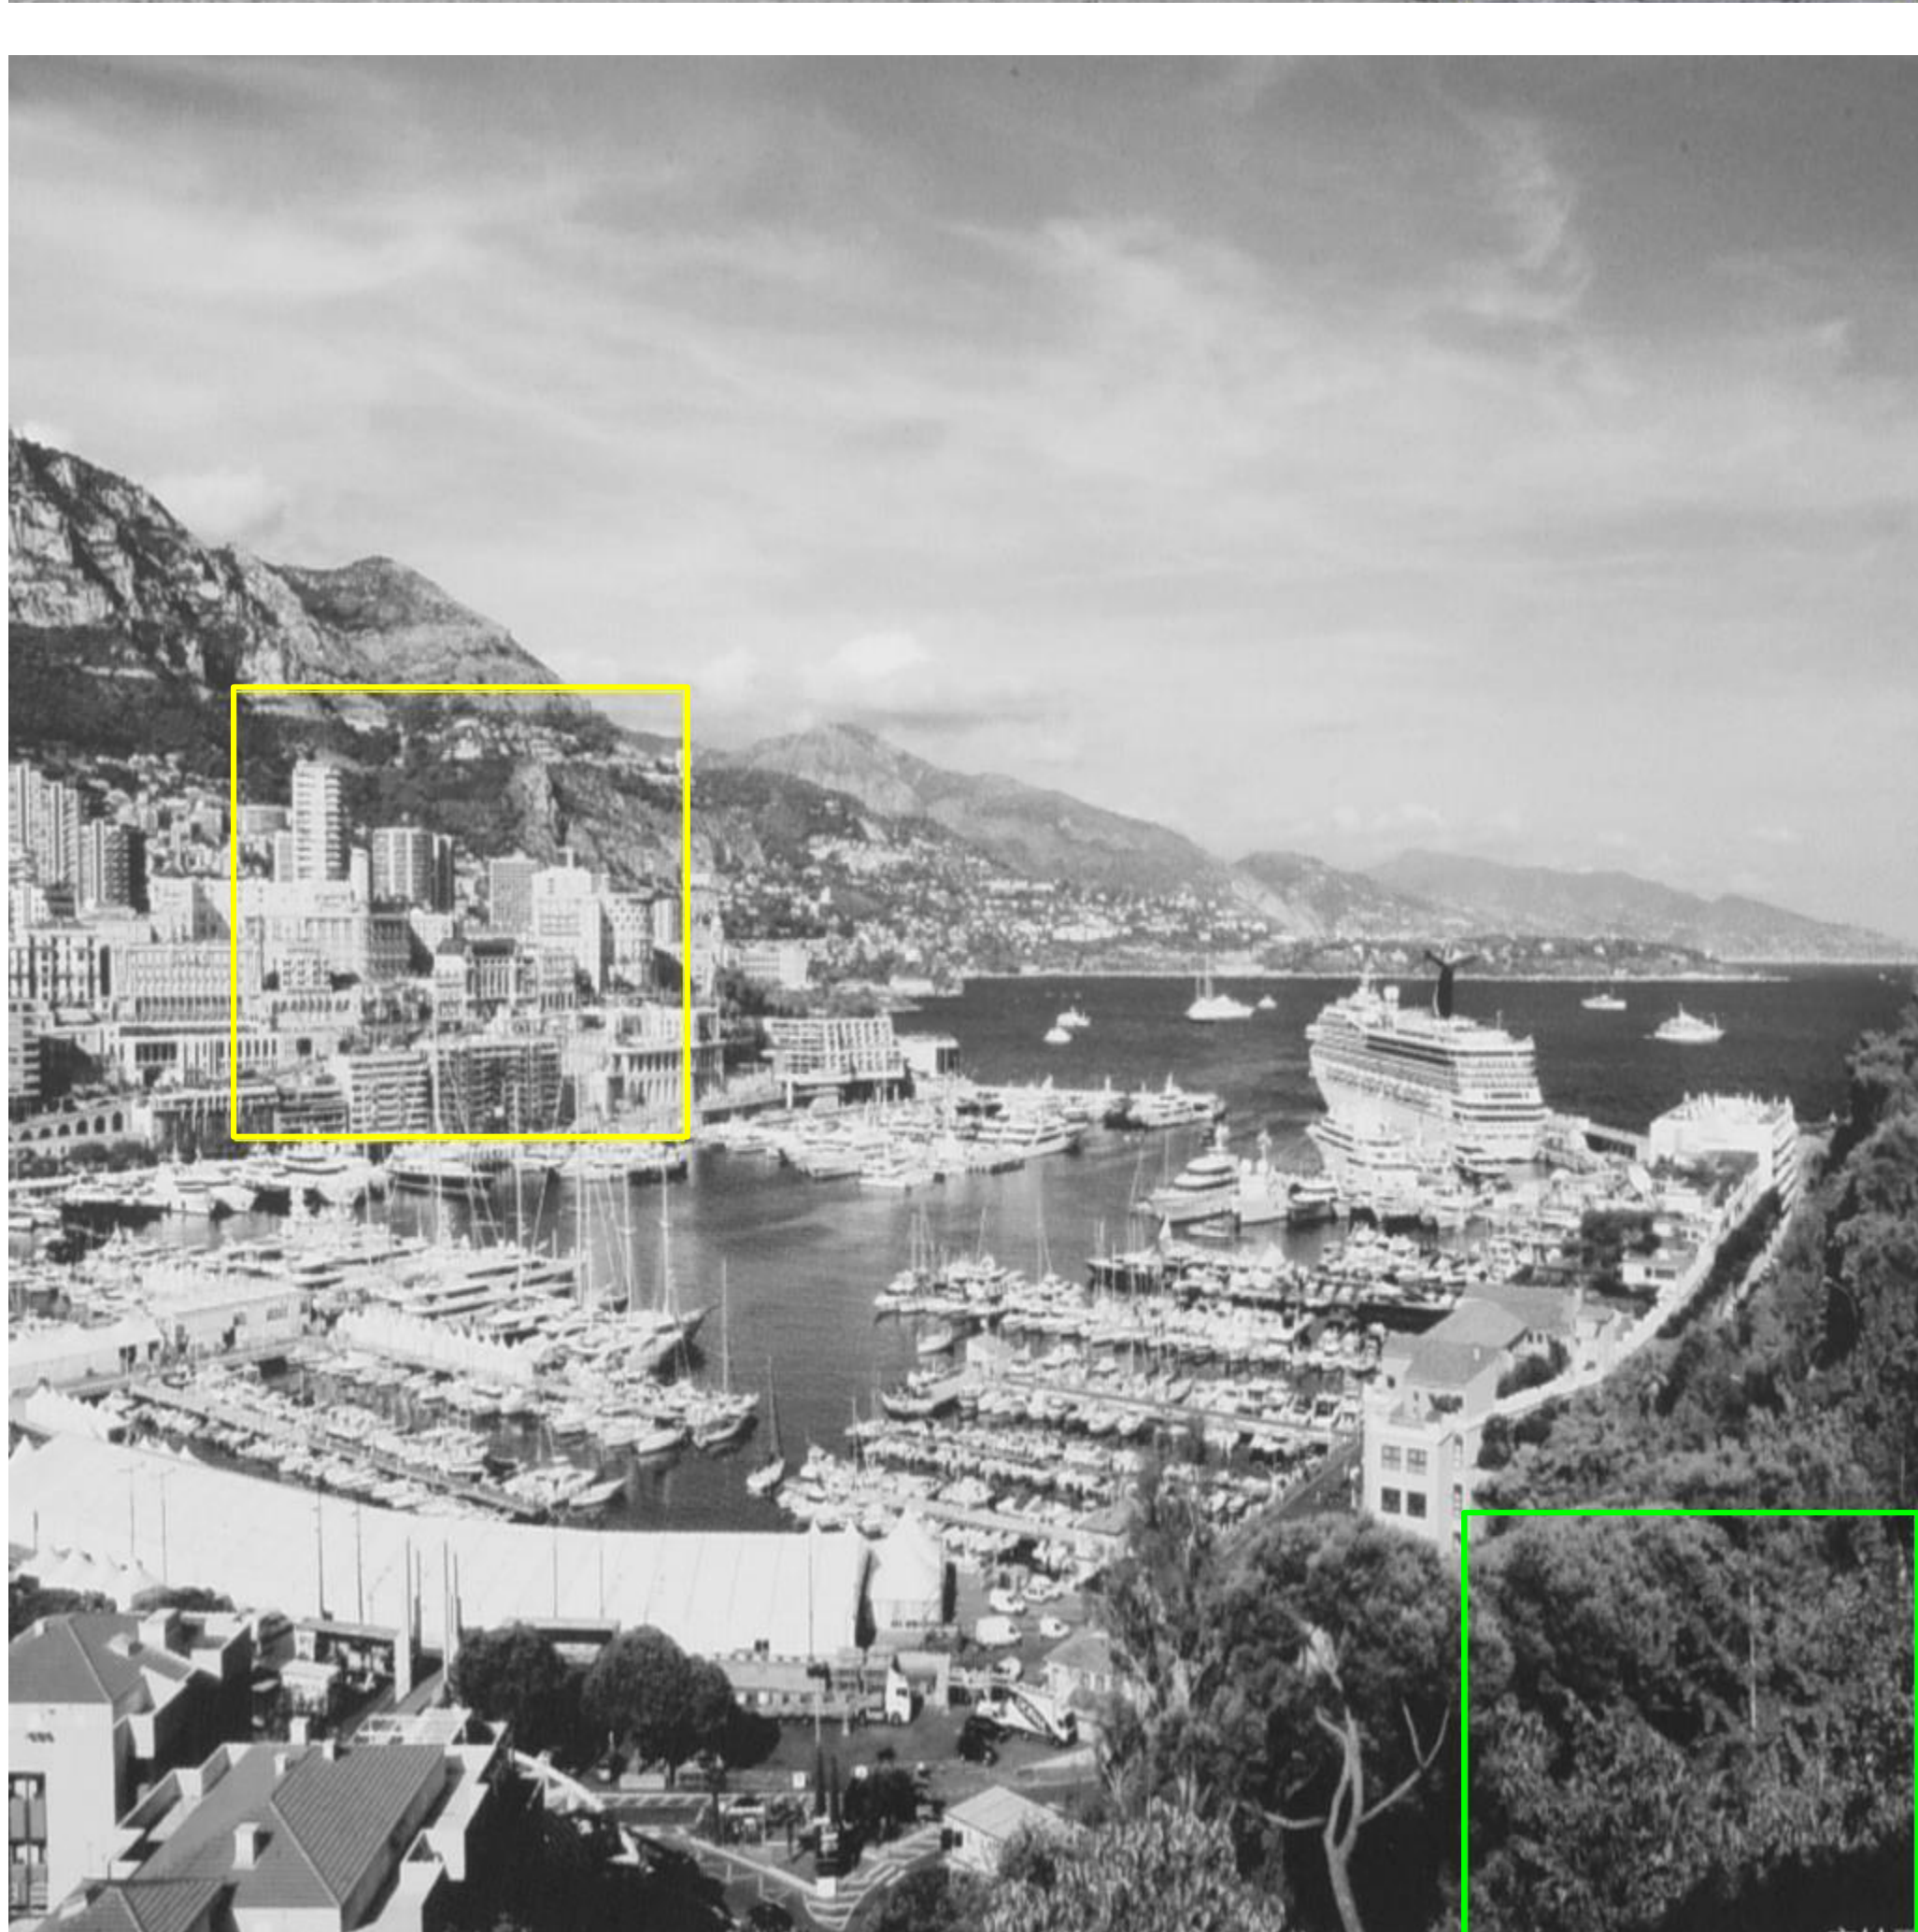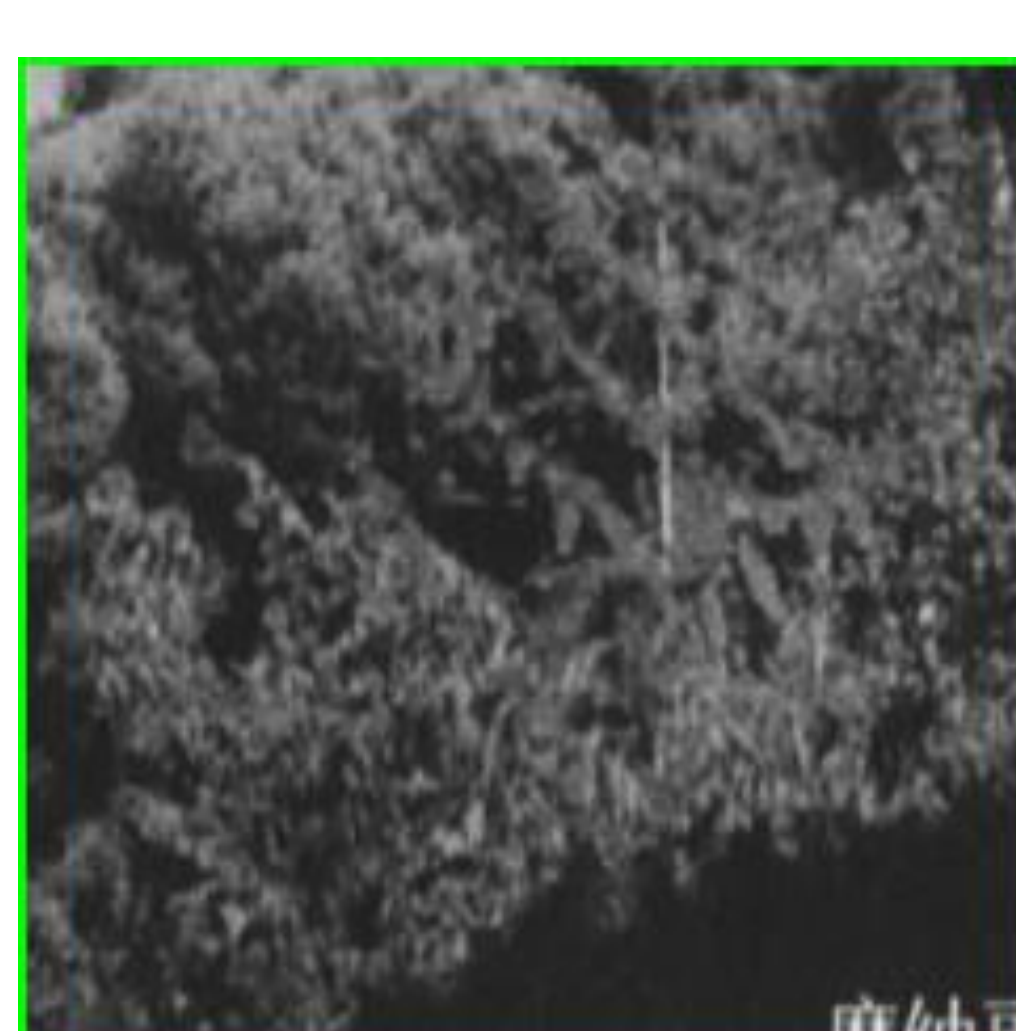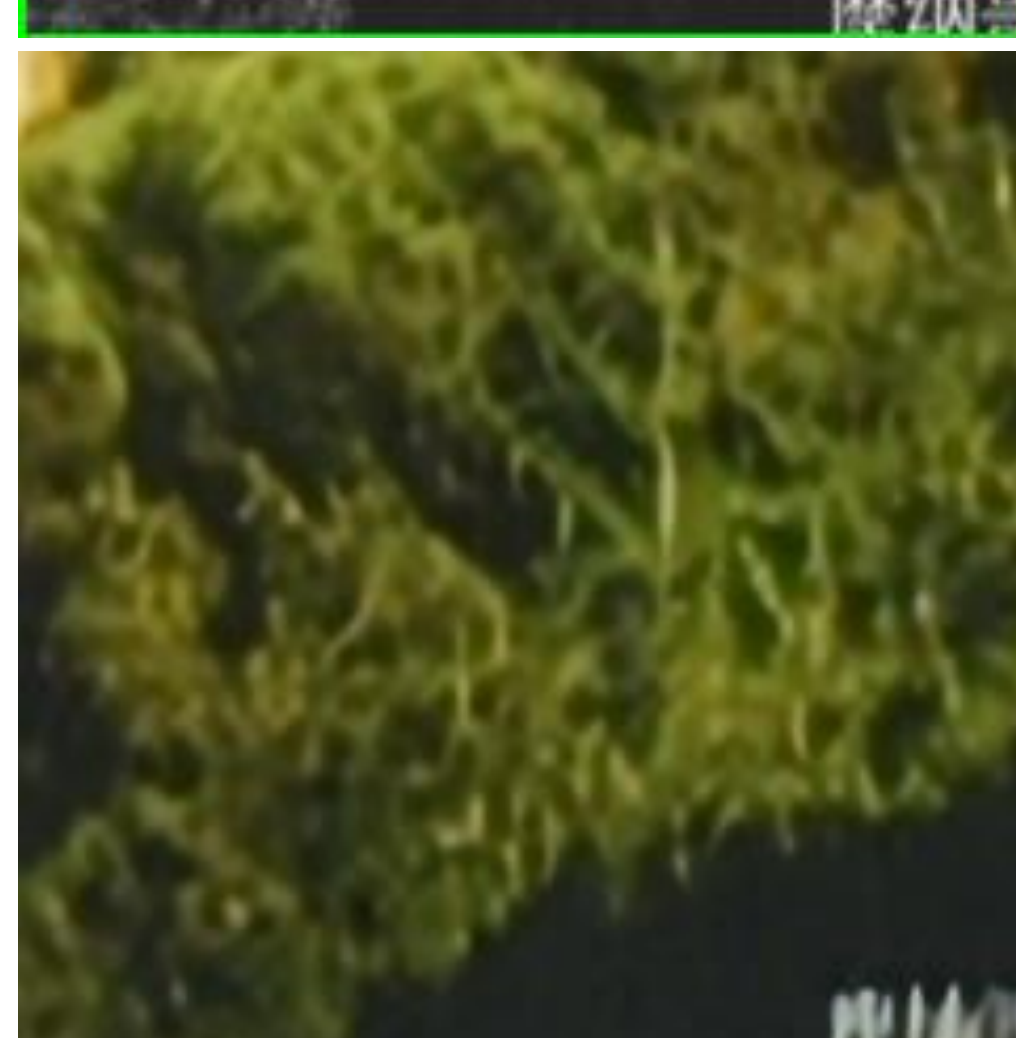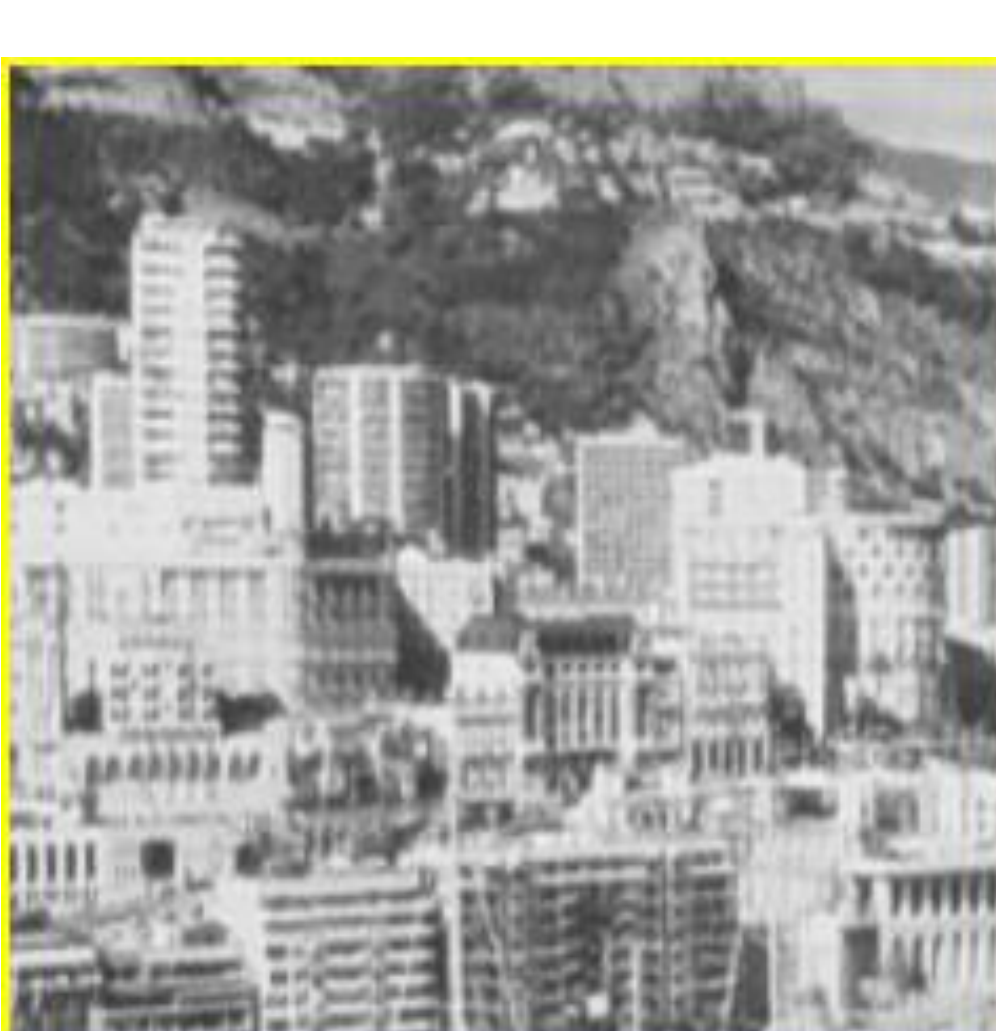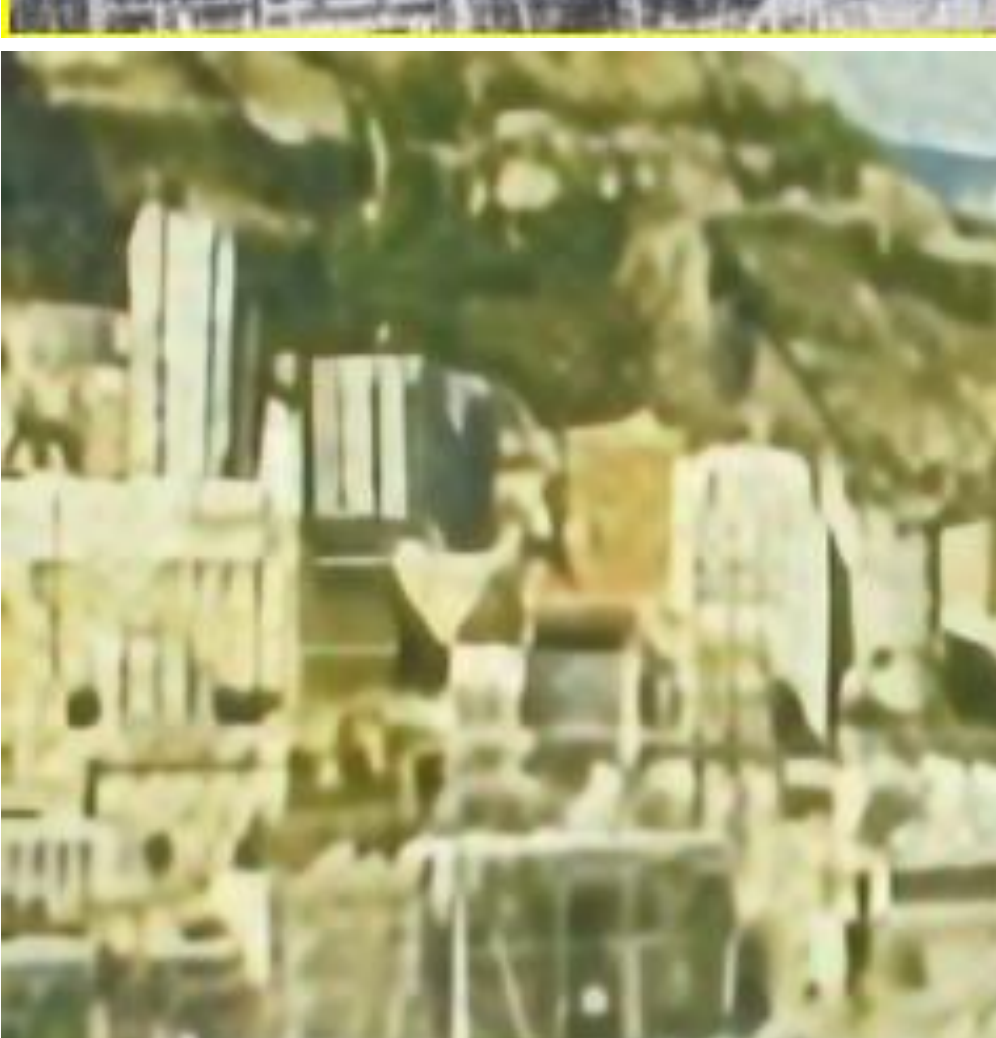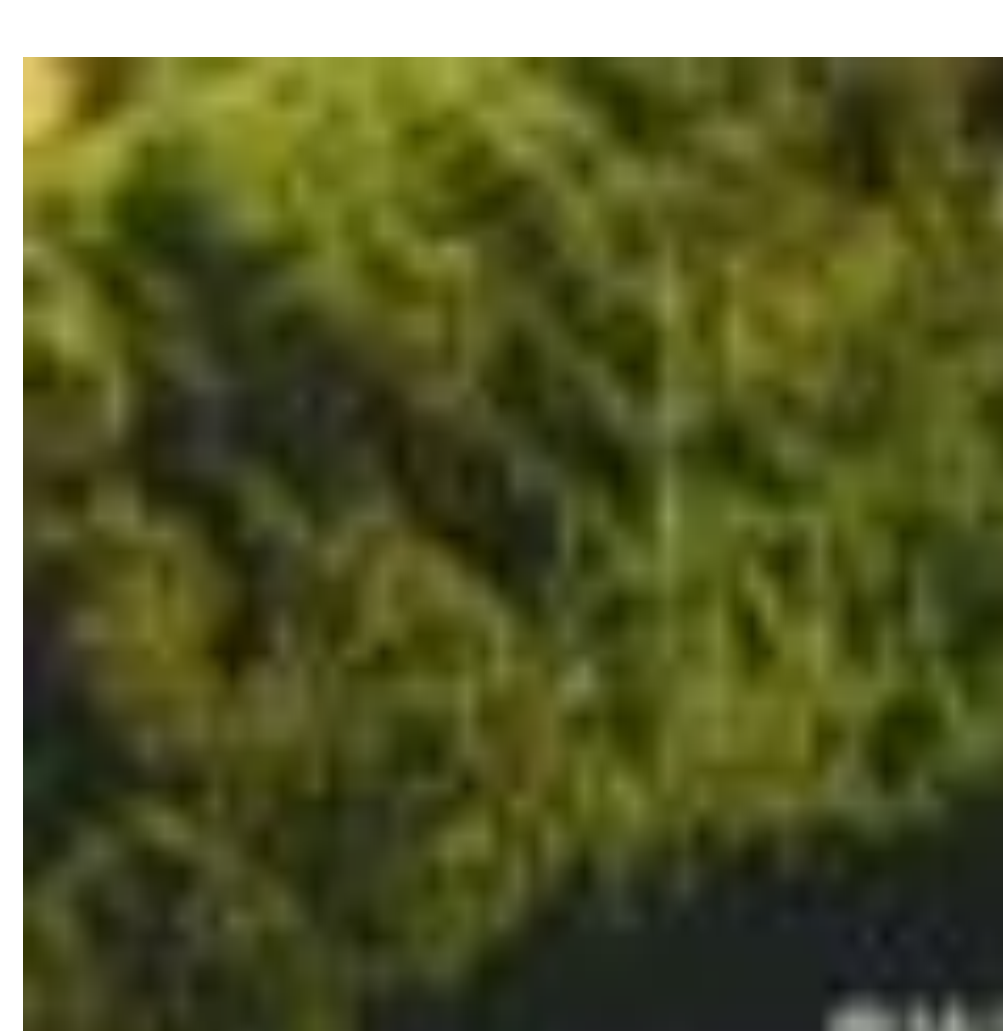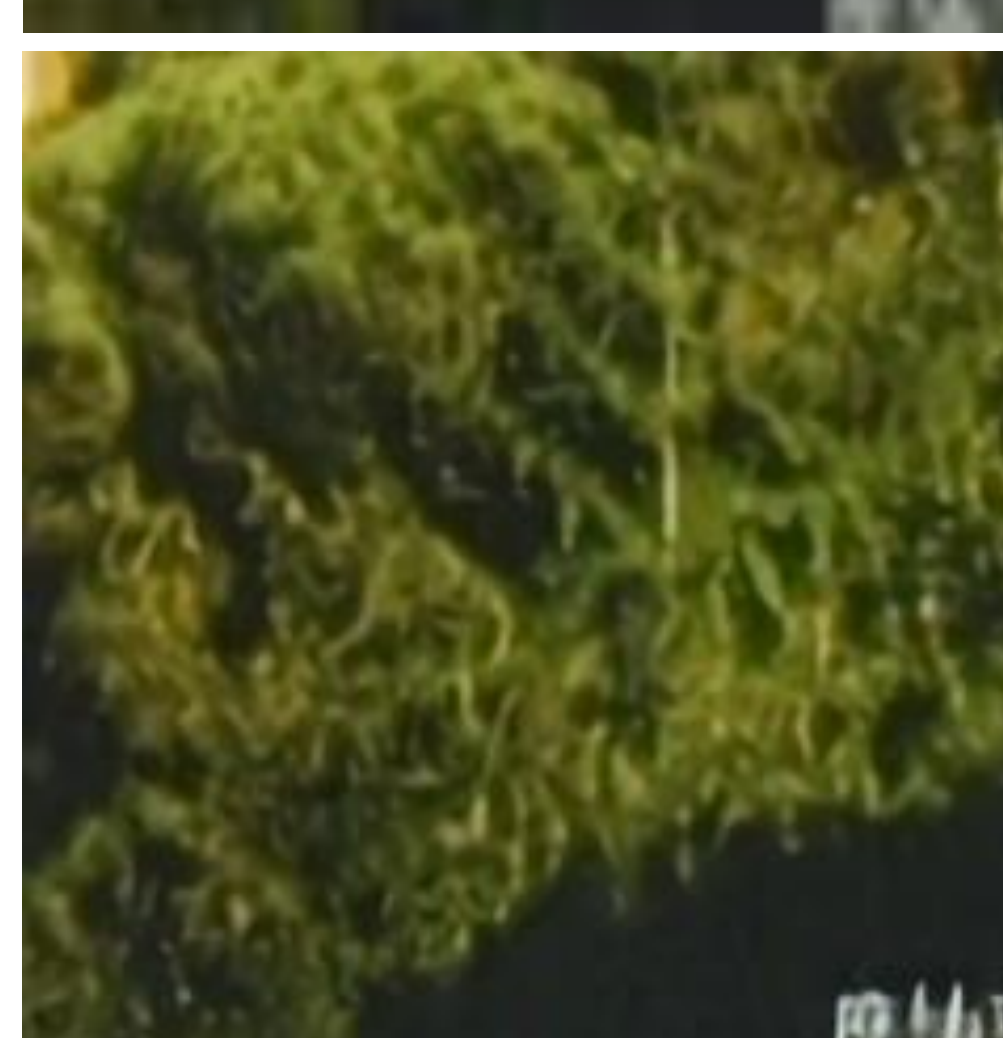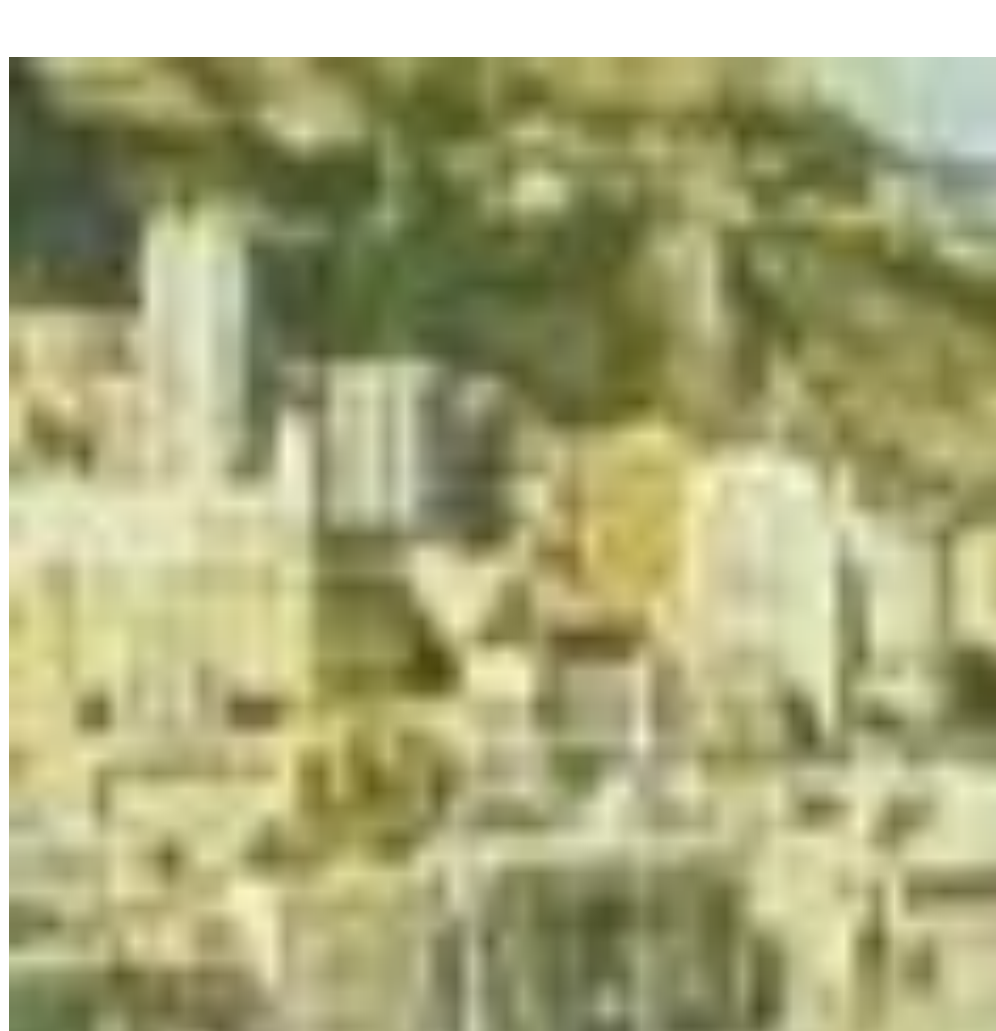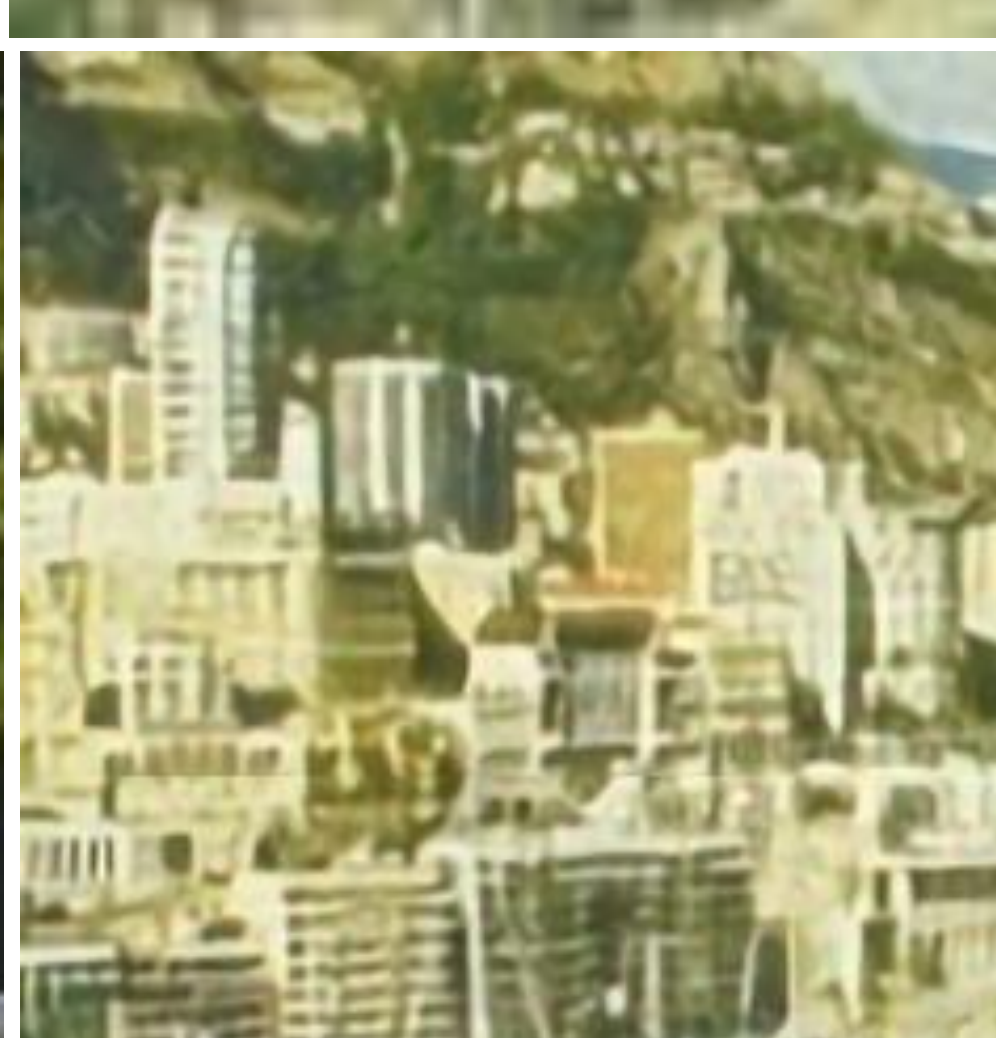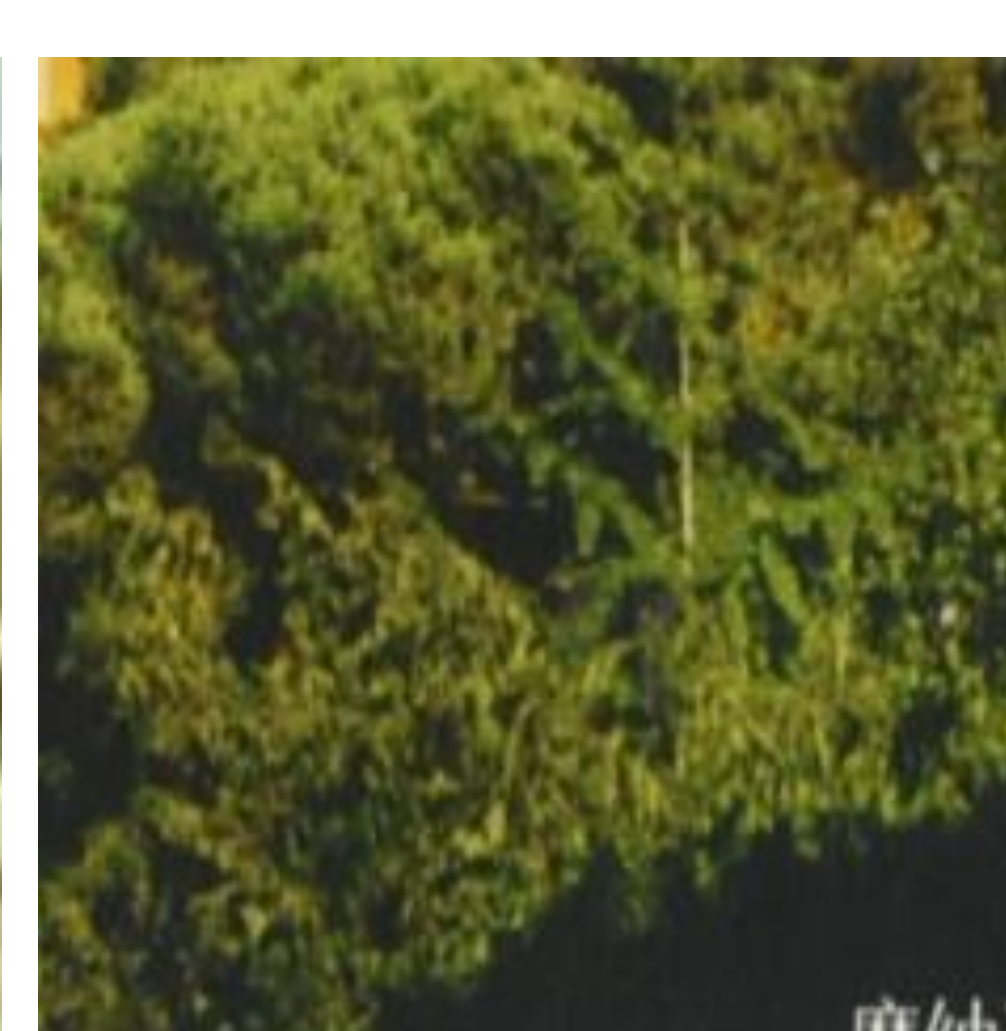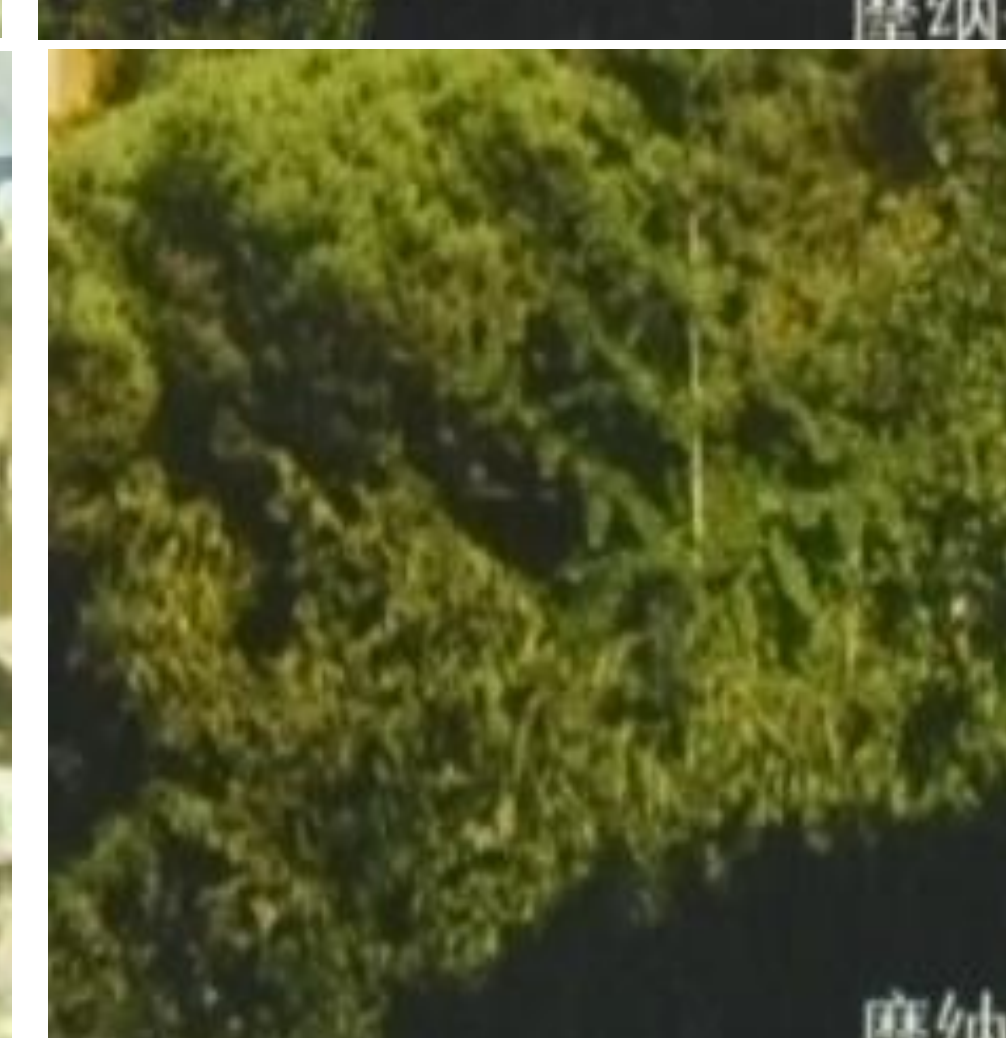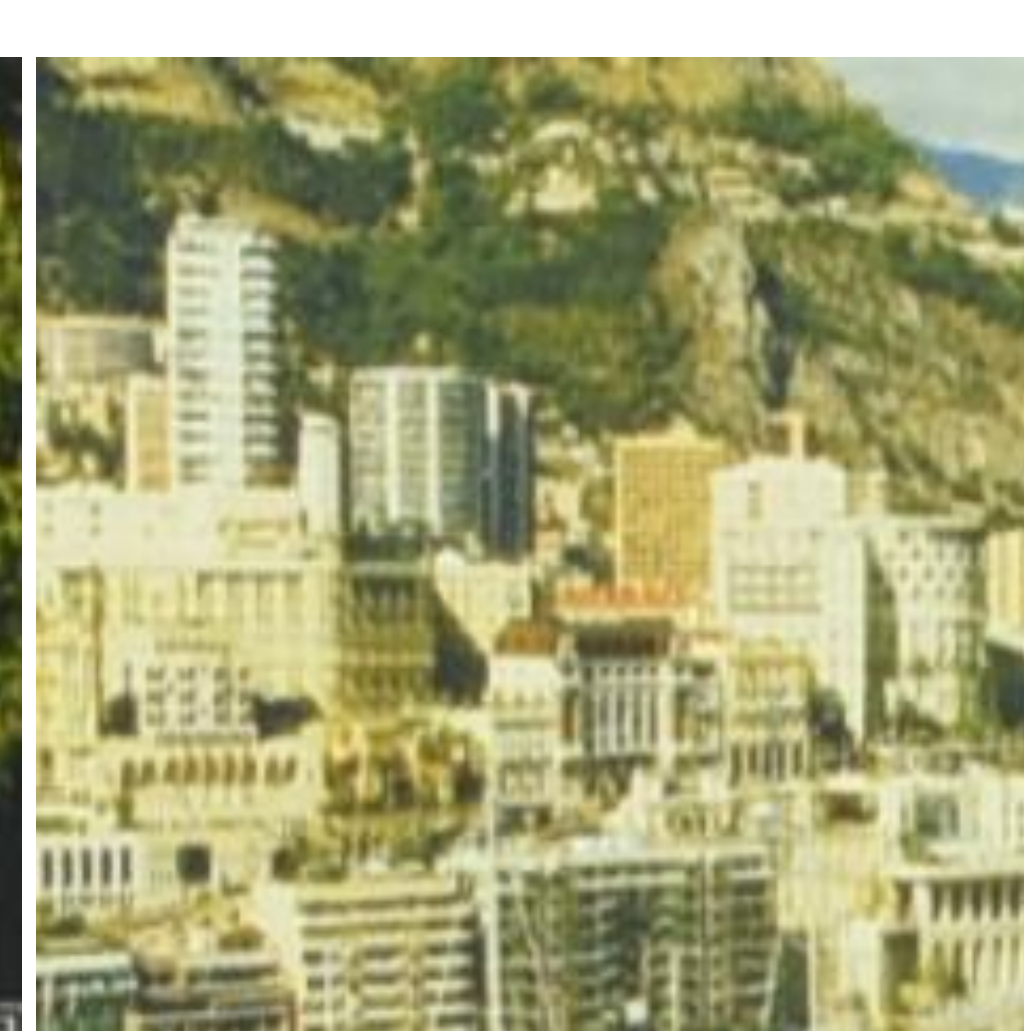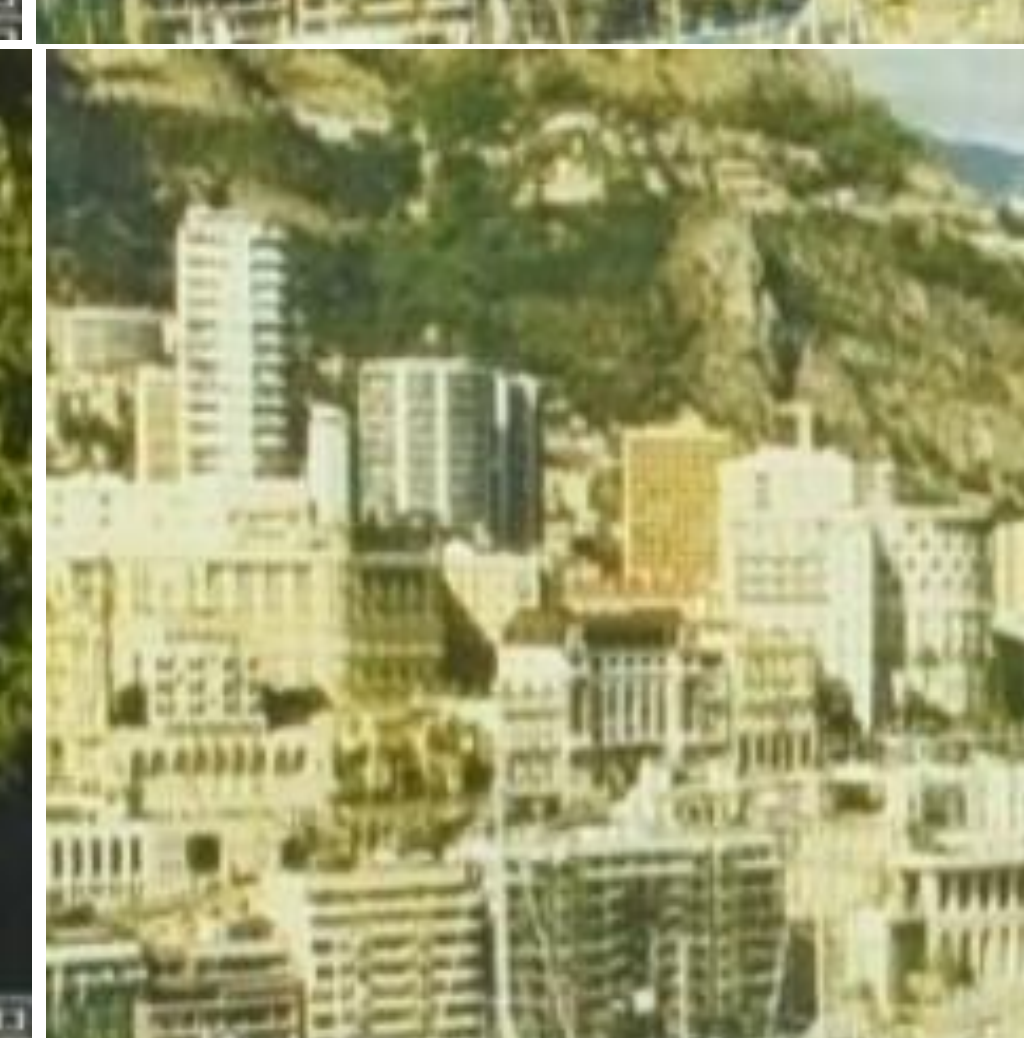

Supplement: Supplementary file 24 [file Guo_Low-light_Color_Imaging_ACCV_2020_supplemental.zip]
